# Supplementary material for: Native RNA sequencing in fission yeast reveals frequent alternative splicing isoforms
Source: HighWire-hosted journal article supplement (doi:10.1101/gr.276516.121), 2022-05-26
Supplement: Supplemental_Fig_S1.pdf [file Supplemental_Fig_S1.pdf]

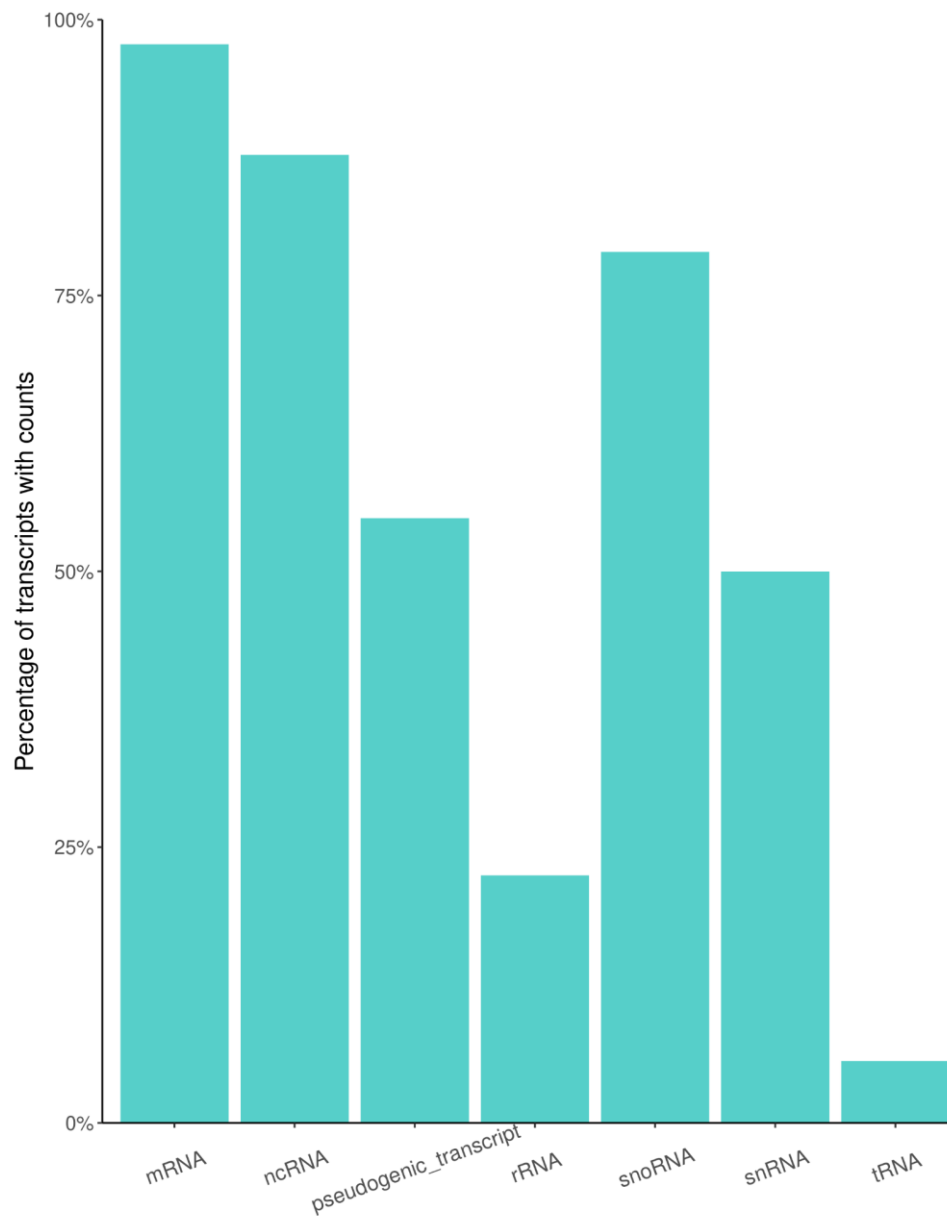

**Fig S1. Coverage of different transcript types by dRNA sequencing.** The plot shows the percentage of transcripts that have at least one mapped read or count, for different transcript classes. The numbers are as follows: mRNA 97.8, ncRNA 87.8, pseudogenes 54.8, rRNA 22.4, snoRNA 78.9, snRNA 50, tRNA 5.61.
