# Supplementary material for: Native RNA sequencing in fission yeast reveals frequent alternative splicing isoforms
Source: HighWire-hosted journal article supplement (doi:10.1101/gr.276516.121), 2022-05-26
Supplement: Supplemental_Fig_S2.pdf [file Supplemental_Fig_S2.pdf]

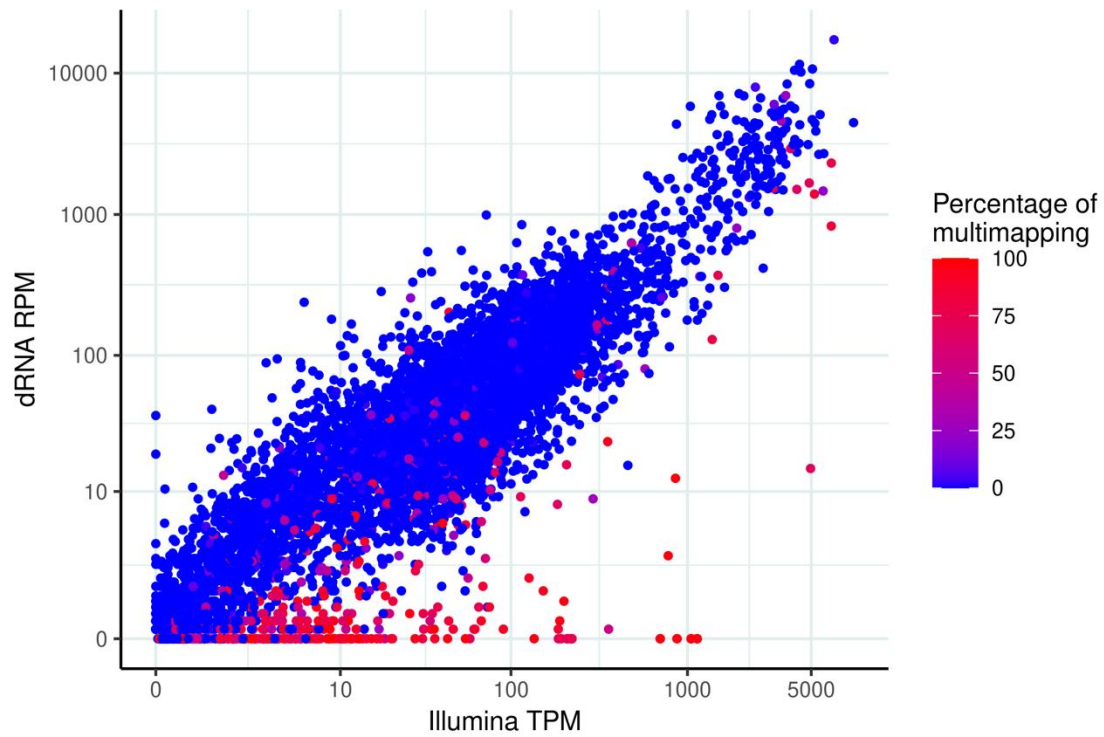

**Fig S2. Correlation between transcript abundances with ONT dRNA and Illumina RNA-Seq reads.** Transcripts with Illumina multimapping reads were taken into account. The percentage of multimapping is indicated with a color scale. Number of transcripts = 6,799 (expressed in at least one of the two datasets). Expression levels tend to be overestimated in the transcripts with multimapping reads.
