# Supplementary material for: Native RNA sequencing in fission yeast reveals frequent alternative splicing isoforms
Source: HighWire-hosted journal article supplement (doi:10.1101/gr.276516.121), 2022-05-26
Supplement: Supplemental_Fig_S3.pdf [file Supplemental_Fig_S3.pdf]

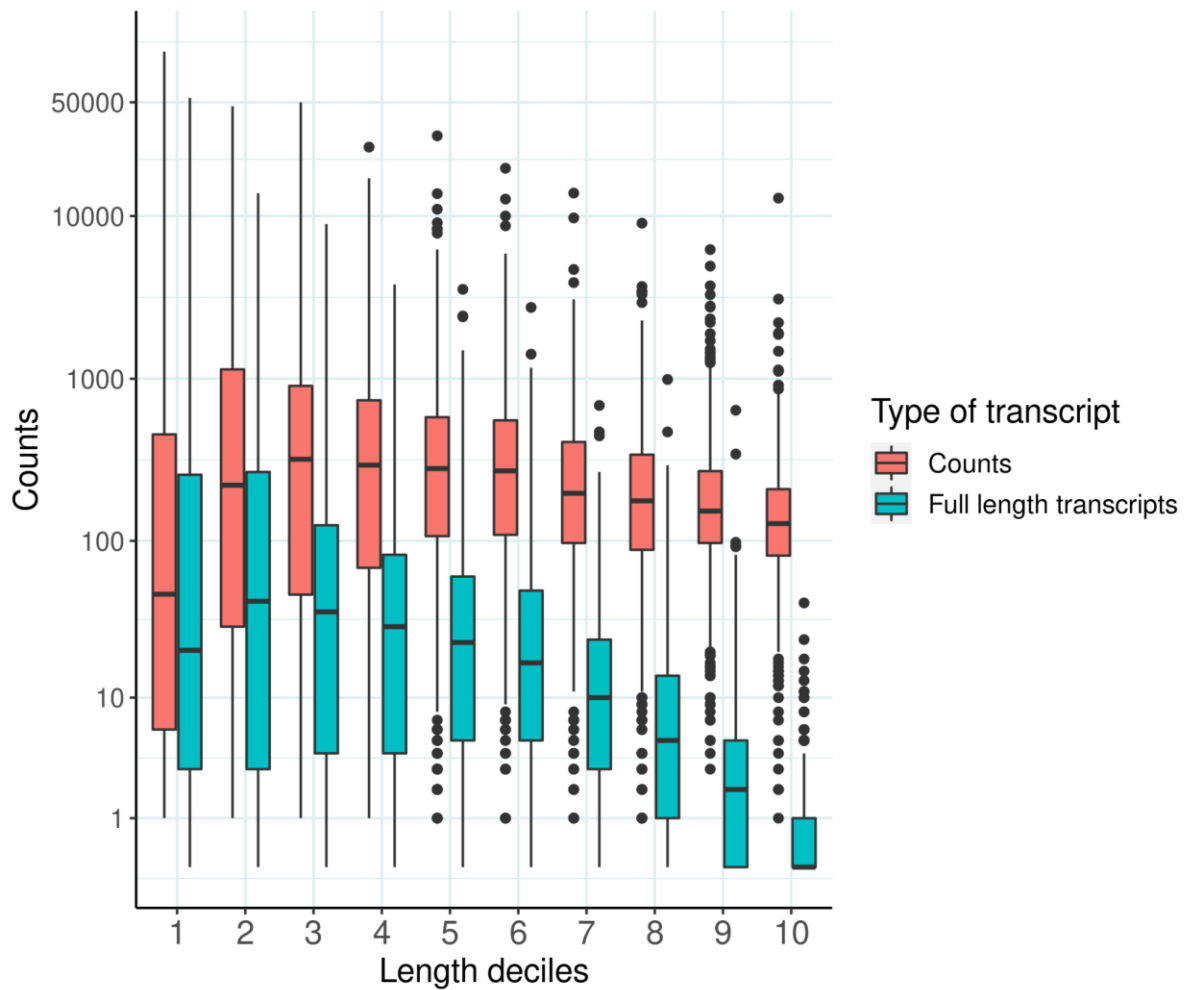

**Fig S3. Total and full length dRNA reads.** The plot shows the total number of dRNA reads mapped to annotated transcripts of different size (counts) and the estimated number of full length reads. Each dRNA read corresponds to a native transcript. Bins are the following: [71.0 - 633.2), [633.2 - 923.4), [923.4 - 1175.0), [1175.0 - 1395.0), [1395.0 - 1637.0), [1637.0 - 1911.2), [1911.2 - 2227.4), [2227.4 - 2695.0), [2695.0 - 3444.6), [3444.6 - 15022.0] nucleotides. Number of transcripts with mapped reads: N=6,453 (out of 7,006 annotated transcripts).
