# Supplementary material for: Native RNA sequencing in fission yeast reveals frequent alternative splicing isoforms
Source: HighWire-hosted journal article supplement (doi:10.1101/gr.276516.121), 2022-05-26
Supplement: Supplemental_Fig_S4.pdf [file Supplemental_Fig_S4.pdf]

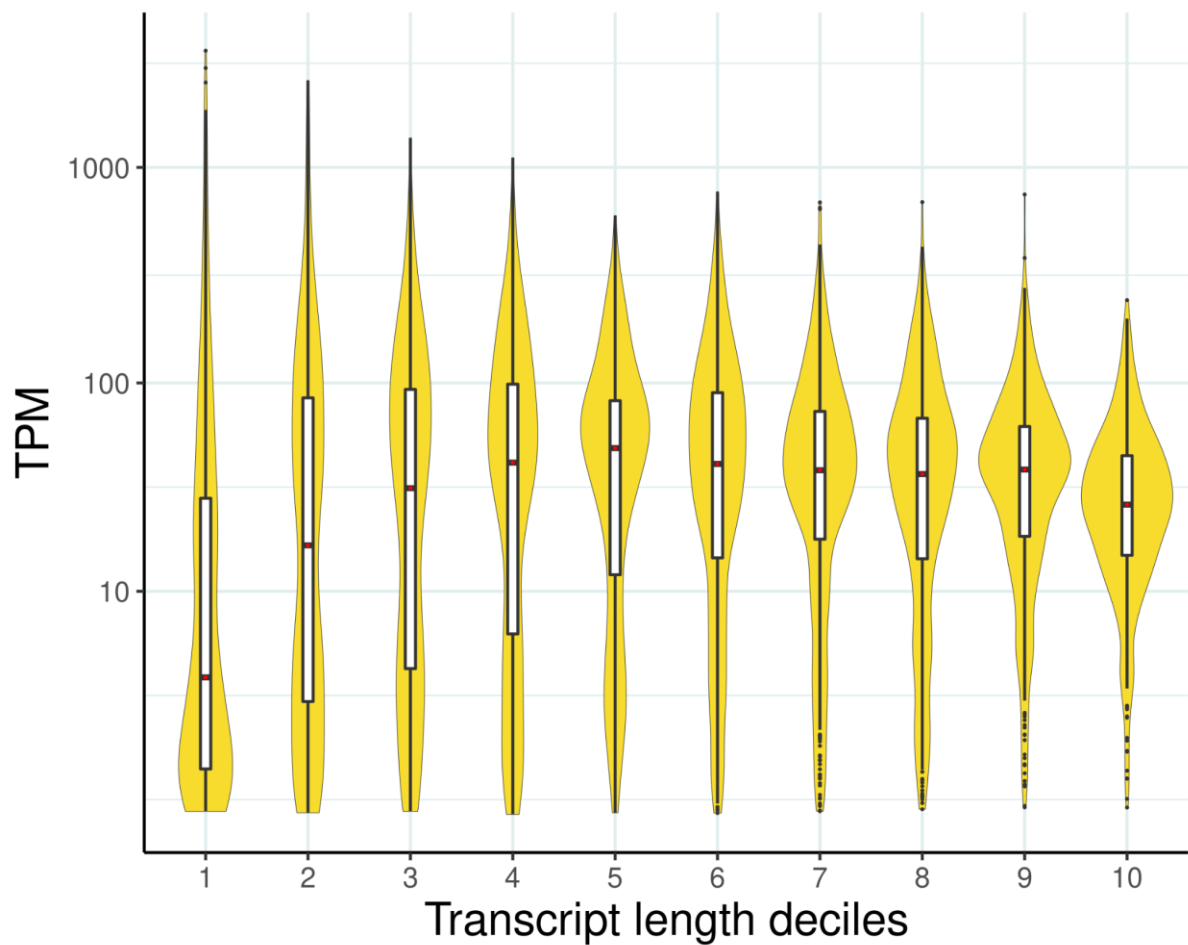

**Fig S4. Transcript abundance with respect to transcript length using Illumina reads.** The plot shows the total number of Illumina RNA-Seq reads mapped to annotated transcripts of different size. The data is shown for 10 length deciles. Deciles bins are [66.0, 575.7), [575.7, 877), [877, 1134.1), [1134.1, 1334.8), [1334.8, 1583.5), [1583.5, 1850.0), [1850.0, 2166.9), [2166.9, 2647.0), [2647.0, 3406.6), [3406.6, 15022.0] nucleotides. TPM: Transcript per Million. Number of transcripts with mapped reads: N=4,958 (out of 7,006 annotated transcripts). Only sequences without multimapping reads were considered.
