# Supplementary material for: Native RNA sequencing in fission yeast reveals frequent alternative splicing isoforms
Source: HighWire-hosted journal article supplement (doi:10.1101/gr.276516.121), 2022-05-26
Supplement: Supplemental_Fig_S6.pdf [file Supplemental_Fig_S6.pdf]

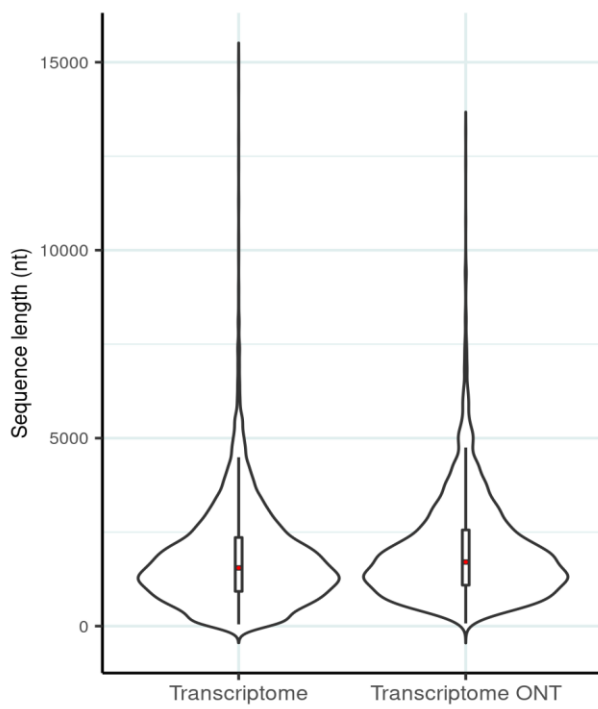

**Fig S6. The dRNA-derived transcriptome has a similar length distribution as the known transcriptome.** Violin plots of transcript lengths in the Pombase transcriptome (Transcriptome) and the Stringtie transcriptome derived from ONT dRNA reads (Transcriptome ONT).
