# Supplementary material for: Native RNA sequencing in fission yeast reveals frequent alternative splicing isoforms
Source: HighWire-hosted journal article supplement (doi:10.1101/gr.276516.121), 2022-05-26
Supplement: Supplemental_Fig_S7.pdf [file Supplemental_Fig_S7.pdf]

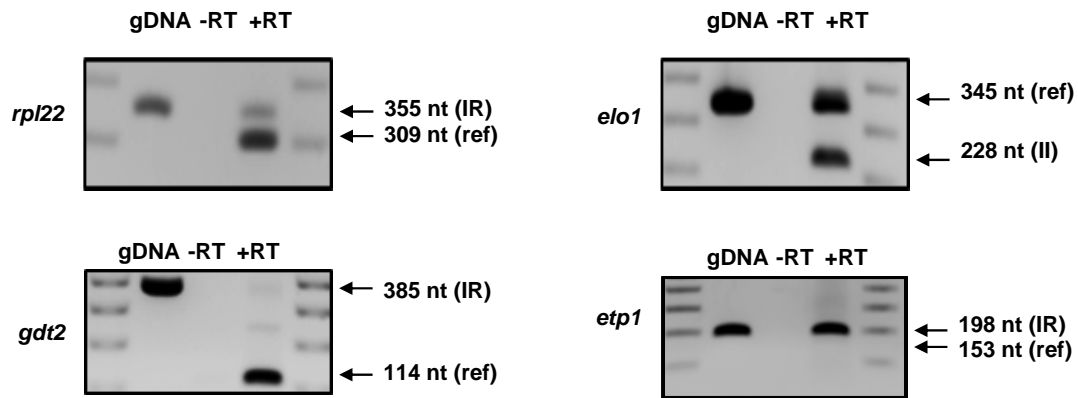

**Fig S7. Validation of alternative isoforms by RT-PCR.** IR: intron retention; II: intron inclusion; ref: reference. *rpl22*: 60S ribosomal protein 22 (first intron); *gdt2*: Golgi calcium ion transporter; *elo1*: fatty acid elongation (third intron), *etp1*: adaptation to high ethanol concentration. For each example, primers on the exons flanking the retained intron were used on PCR reactions using either genomic DNA (gDNA) or cDNA as template (+RT). Control reaction without reverse transcriptase (-RT) after the DNase treatment were also run. PCR from genomic DNA indicates the intron-containing product. The migration and size of spliced and intron retention (IR)/intron inclusion (II) products is indicated on the right of each panel. 100-bp DNA molecular weight markers were run at both sides of the PCR reaction products.
