# Supplementary material for: Native RNA sequencing in fission yeast reveals frequent alternative splicing isoforms
Source: HighWire-hosted journal article supplement (doi:10.1101/gr.276516.121), 2022-05-26
Supplement: Supplemental_Fig_S8.pdf [file Supplemental_Fig_S8.pdf]

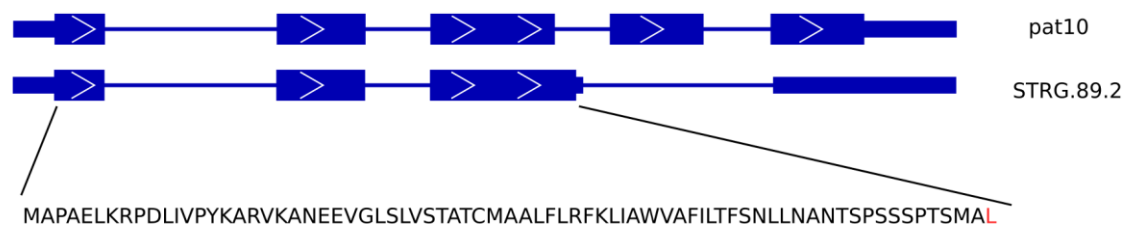

**Pat10 reference protein:**

MAPAELKRPD LIVPYKARVKANEEVGLSLVSTATCMAALFLRFKLIWVAFILTFSNLLNANTSPSSSPTSMAFMGIAALVSTYLPQFLNTPNKT

**Fig S8. Alternative splicing in *pat10*.** Alternative splicing involves the use of a downstream splice site in intron 3 and skipping of exon 4. The resulting protein is 74 amino acids long compared with 95 for the reference protein. The red part indicates the new amino acid included in the alternative isoform. The gene is also known as SPAC18B11.08c.
