# Supplementary material for: Native RNA sequencing in fission yeast reveals frequent alternative splicing isoforms
Source: HighWire-hosted journal article supplement (doi:10.1101/gr.276516.121), 2022-05-26
Supplement: Supplemental_Fig_S9.pdf [file Supplemental_Fig_S9.pdf]

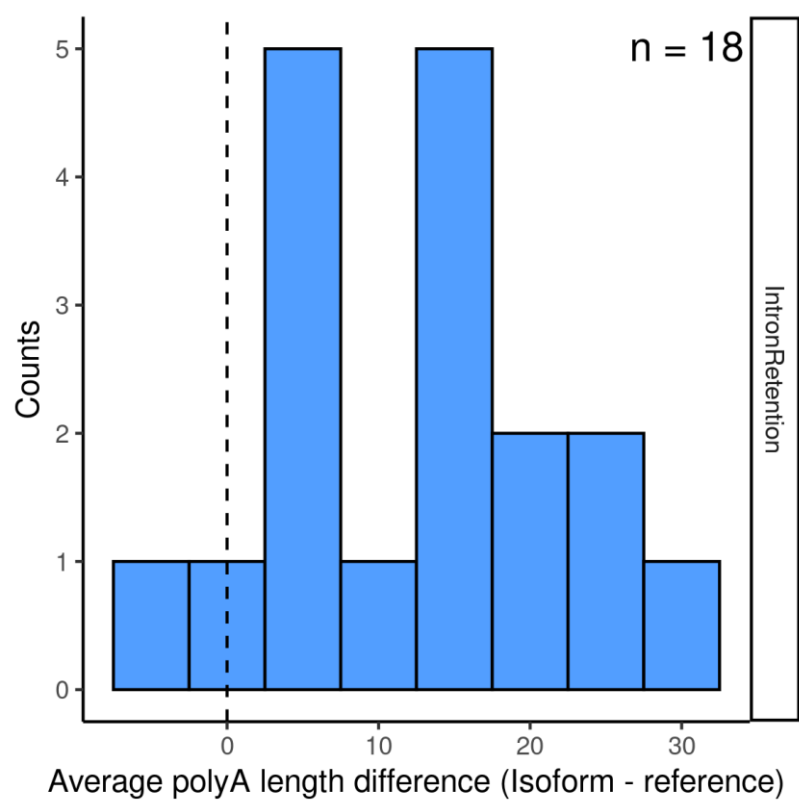

**Fig S9. Poly(A) length differences between the isoform and the reference transcript.** The plot is for intron retention isoforms with evidence of translation by ribosome profiling data.
