# Supplementary material for: Native RNA sequencing in fission yeast reveals frequent alternative splicing isoforms
Source: HighWire-hosted journal article supplement (doi:10.1101/gr.276516.121), 2022-05-26
Supplement: Supplemental_Fig_S11.pdf [file Supplemental_Fig_S11.pdf]

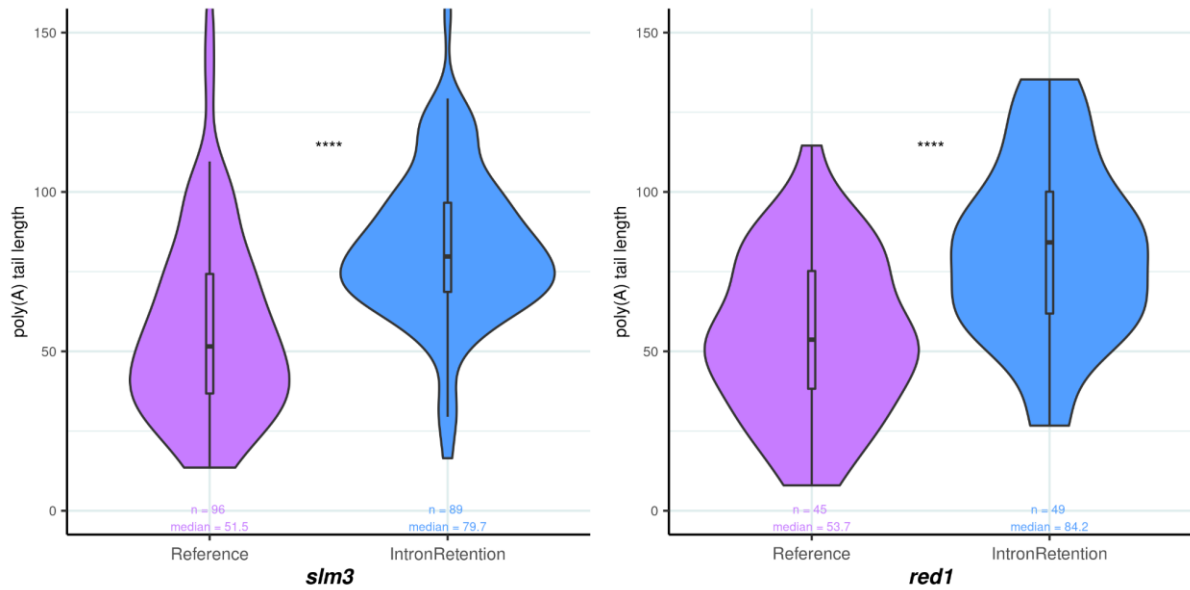

**Fig S11. poly(A) tail length in *slm3* and *red1*.** Violin plus boxplots of the distribution of the poly(A) tails of all the reads that map each isoform. n refers to the number of reads that mapped to a specific isoform and which had poly(A) tail length information according to nanopolish (v 0.13.3) polya script. Median is the median poly(A) tail length value. Analysis of significant differences was performed using a Wilcoxon test, \*\*\*\* p-value <  $10^{-5}$ .
