# Supplementary material for: Native RNA sequencing in fission yeast reveals frequent alternative splicing isoforms
Source: HighWire-hosted journal article supplement (doi:10.1101/gr.276516.121), 2022-05-26
Supplement: Supplemental_Fig_S14.pdf [file Supplemental_Fig_S14.pdf]

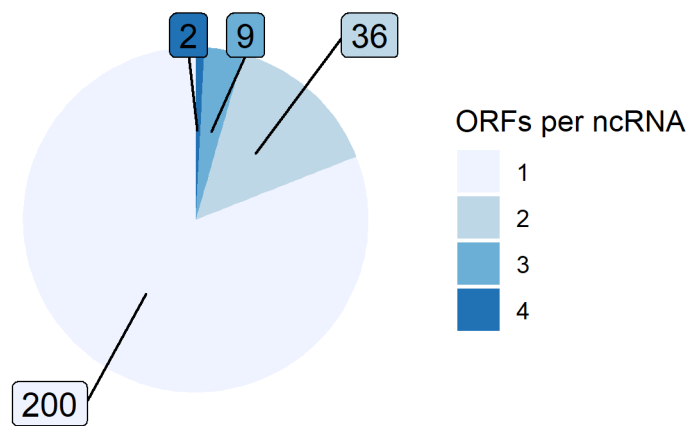

**Fig S14. Number of ORFs per ncRNA with evidence of translation.** We identified 247 ncRNAs containing a total of 307 ORFs predicted to be translated by RiboORF (10 or more Ribo-Seq mapped reads and RibORF score > 0.7). The number of translated ORFs in these ncRNAs was 307: 1 ORF in 200 cases, 2 ORFs in 36 cases, 3 ORFs in 9 cases and 4 ORFs in 2 cases. The average length of these ncRNAs was 1,636.267 nucleotides *versus* 1,176.715 for ncRNAs with no translation evidence and 1,250.895 for all ncRNAs. Difference in length between ncRNA without and with translated ORF is statistically significant (Wilcoxon test, p-value = 3.899 e-12).
