# Supplementary material for: Native RNA sequencing in fission yeast reveals frequent alternative splicing isoforms
Source: HighWire-hosted journal article supplement (doi:10.1101/gr.276516.121), 2022-05-26
Supplement: Supplemental_Table_S2.pdf [file Supplemental_Table_S2.pdf]

| Transcript type      | n            | Mean length      | Median length | Min length | Max length    |
|----------------------|--------------|------------------|---------------|------------|---------------|
| <b>Pombase</b>       | <b>7,006</b> | <b>1,792.125</b> | <b>1,548</b>  | <b>47</b>  | <b>15,022</b> |
| mRNA                 | 5,140        | 2,055.093        | 1,789         | 75         | 15,022        |
| ncRNA                | 1,527        | 1,250.895        | 1,036         | 56         | 5,317         |
| <b>Transcriptome</b> | <b>5,799</b> | <b>1,989.550</b> | <b>1710</b>   | <b>164</b> | <b>13,153</b> |
| <b>ONT dRNA</b>      |              |                  |               |            |               |
| Not novel            | 5,585        | 2,002.445        | 1,723         | 164        | 13,153        |
| Novel antisense      | 158          | 1,391.487        | 993.5         | 275        | 6,742         |
| Novel intergenic     | 56           | 667.035          | 570.5         | 227        | 1,549         |

**Table S2. Transcriptome features.** Number and length statistics of different collections of transcripts. n refers to the number of transcripts; length is in nucleotides. Pombase gene annotations were downloaded on Feb 1 2021 from <http://www.pombase.org>. mRNA and ncRNA refers to different transcripts types in Pombase. The ONT dRNA transcriptome was obtained by *de novo* transcript assembly of direct RNA ONT sequencing reads with Stringtie. The number of genome mapped reads employed was 5,054,233. Novel transcripts were subsequently defined as those not overlapping any annotated gene in the same orientation. Those that overlapped other genes in the opposite orientation were classified as antisense.
