# Supplementary material for: Native RNA sequencing in fission yeast reveals frequent alternative splicing isoforms
Source: HighWire-hosted journal article supplement (doi:10.1101/gr.276516.121), 2022-05-26
Supplement: Supplemental_Table_S4.pdf [file Supplemental_Table_S4.pdf]

| Transcript id      | Type       | Length (nt) | Other transcript ID | Distance (bp) |
|--------------------|------------|-------------|---------------------|---------------|
| <b>STRG.1411.1</b> | Antisense  | 2948        | SPAC4H3.02c         | 358           |
| <b>STRG.2665.1</b> | Intergenic | 639         | SPBC2F12.05c        | 123           |
| <b>STRG.2999.1</b> | Antisense  | 998         | SPBC6B1.07          | 198           |
| <b>STRG.4201.1</b> | Antisense  | 1675        | SPCC584.13          | 177           |

**Table S4. Novel transcripts predicted to have originated from bidirectional promoters.** The transcripts are located in antisense orientation to other transcripts and the distance between the two transcription start sites is less than 400 bp.
