# Supplementary material for: Native RNA sequencing in fission yeast reveals frequent alternative splicing isoforms
Source: HighWire-hosted journal article supplement (doi:10.1101/gr.276516.121), 2022-05-26
Supplement: Supplemental_Table_S5.pdf [file Supplemental_Table_S5.pdf]

| Ingredient                            | Amount  |
|---------------------------------------|---------|
| Yeast extract                         | 15g/L   |
| Peptone                               | 10g/L   |
| Dextrose*                             | 20g/L   |
| SC Amino Acid mix (Sunrise Science)** | 2g/L    |
| Adenine                               | 100mg/L |
| Tryptophan                            | 100mg/L |
| Uracil                                | 100mg/L |

**Table S5. Composition rich medium.** Described in Tsankov et al. (2010) "The Role of Nucleosome Positioning in the Evolution of Gene Regulation"; they grew a dozen different yeast species in 40 different media and determined that this 'ideal' mixture allowed for at least ~80% of maximal growth rate for all the species. \* Dextrose is the same as D-(+)-Glucose monohydrate. \*\* You can make the SC amino acid mix by adding back the missing amino acids to a dropout mixture (Sup Table 6).
