# Supplementary material for: Native RNA sequencing in fission yeast reveals frequent alternative splicing isoforms
Source: HighWire-hosted journal article supplement (doi:10.1101/gr.276516.121), 2022-05-26
Supplement: Supplemental_Table_S8.xlsx [file Supplemental_Table_S8.xlsx]

## Sheet: README
Sheet	Info
Transcriptome_statistics	Number and length of transcripts in gene annotations and transcript subsets.
Transcriptome_PomBase_data	Number of dRNA reads mapped to gene annotations (Counts); Illumina quantification (TPM, FPKM); average polyA length per transcript.
Isoforms_dRNA_Stringtie	Isoform_types; number of dRNA reads mapped to gene annotations (Counts); Illumina quantification (TPM, FPKM); Splicing signals (TranscriptClean); counts Ribo-Seq intron retention (only in retained intron); average polyA length per transcript; comparisons size isoform-reference.
Retained_intron_RiboSeq	Ribo-Seq reads >=5 in the retained intron
Novel antisense transcripts	Expression and length data for non-annotated transcripts in antisense configuration
Novel intergenic transcripts	Expression and length data for intergenic non-annotated transcripts
Novel transcripts translated	Subset of novel transcripts with translation evidence (RibORF score > 0.7), predicted peptides.
Missing Pombase 3'UTR	List of genes with 3'UTR information in the Stringtie transcriptome that was missing from Pombase
Missing Pombase 5'UTR	List of genes with 5'UTR information in the Stringtie transcriptome that was missing from Pombase

## Sheet: Transcriptome_statistics
Transcript_info
Transcriptome	n	mean_len(nt)	median_len(nt)	min_len	max_len	Observations
1.Pombase	7006	1792.12	1548	47	15022	Pombase database (Feb 1 2021)
2.Stringtie assembly	5799	1989.55	1710	164	13153	Stringtie for long reads
2.1Not novel	5585	2002.44	1723	164	13153	Overlap same orientation
2.2Novel_antisense	158	1391.49	993.5	275	6742	Overlap opposite orientation
2.3Novel_intergenic	56	667.035	570.5	227	1549	No overlap
1.1Pombase_coding	5140	2044.09	1789	75	15022	Pombase transcripts with “original_biotype = mrna”.
1.2Pombase_ncRNA	1527	1250.89	1036	56	5317	Pombase transcripts with “original_biotype = ncrna”.

## Sheet: Transcriptome_PomBase_data
Transcript	Gene	Gene_name	GO	Type	length_nt	Counts_dRNA	Estimated_FullLengthReads	Illumina_RPKM	Illumina_TPM	polyA_tail_mean_length	NReads_polyATail	CoefficientOfVariation_polyATails
SPAC1002.01.1	SPAC1002.01	mrx11	Other	mRNA	540	32	0	16.2007	21.9013	40.14	3	0.514963
SPAC1002.02.1	SPAC1002.02	pom34	Other	mRNA	993	201	104	80.1083	108.296	44.4482	34	0.425363
SPAC1002.03c.1	SPAC1002.03c	gls2	Other	mRNA	3227	268	9	53.4432	72.2484	41.2171	24	0.414551
SPAC1002.04c.1	SPAC1002.04c	taf11	Other	mRNA	868	449	315	59.5904	80.5586	49.2107	102	0.42005
SPAC1002.05c.1	SPAC1002.05c	jmj2	Other	mRNA	2250	86	6	13.1496	17.7766	52.7071	28	0.290796
SPAC1002.06c.1	SPAC1002.06c	bqt2	Reproduction	mRNA	357	5	5	2.79503	3.77852	41.465	4	0.751159
SPAC1002.07c.1	SPAC1002.07c	-	Other	mRNA	945	1288	150	84.4965	114.229	38.7545	892	0.636492
SPAC1002.08c.1	SPAC1002.08c	mtf1	Other	mRNA	1882	218	10	32.9337	44.5221	50.801	52	0.416096
SPAC1002.09c.1	SPAC1002.09c	dld1	Other	mRNA	2398	1209	36	143.751	194.332	43.9825	89	0.385425
SPAC1002.10c.1	SPAC1002.10c	sgt1	Other	mRNA	2057	112	4	20.8926	28.2441	43.2562	13	0.42197
SPAC1002.11.1	SPAC1002.11	gaa1	Other	mRNA	2069	107	21	41.2288	55.7361	53.7932	28	0.415004
SPAC1002.12c.1	SPAC1002.12c	-	Other	mRNA	1939	291	24	37.7818	51.0762	39.2473	26	0.420233
SPAC1002.13c.1	SPAC1002.13c	psu1	Other	mRNA	2013	1058	161	841.406	1137.47	51.9115	103	0.32231
SPAC1002.14.1	SPAC1002.14	itt1	Translation	mRNA	1679	194	19	39.2236	53.0253	48.62	24	0.403663
SPAC1002.15c.1	SPAC1002.15c	med6	Other	mRNA	2524	210	4	23.7293	32.079	47.2257	77	0.425574
SPAC1002.16c.1	SPAC1002.16c	-	Other	mRNA	2097	14	0	5.18992	7.0161	44.0617	12	0.32417
SPAC1002.17c.1	SPAC1002.17c	urg2	Other	mRNA	1343	22	1	4.63068	6.26009	41.7888	16	0.368582
SPAC1002.18.1	SPAC1002.18	urg3	Other	mRNA	1495	115	50	27.1944	36.7633	45.8528	40	0.408054
SPAC1002.19.1	SPAC1002.19	urg1	Other	mRNA	1791	32	0	3.6408	4.9219	40.8412	25	0.366305
SPAC1002.20.1	SPAC1002.20	-	Other	mRNA	749	0	0	0.464724	0.628248	0	0	0
SPAC1006.01.1	SPAC1006.01	psp3	Other	mRNA	1878	227	21	79.0436	106.857	52.5719	175	0.393718
SPAC1006.02.1	SPAC1006.02	asa1	Other	mRNA	1440	364	39	33.8732	45.7922	41.0596	263	0.477992
SPAC1006.03c.1	SPAC1006.03c	red1	Other	mRNA	2603	414	14	39.4748	53.3648	71.4276	198	0.446177
SPAC1006.04c.1	SPAC1006.04c	mcp3	Other	mRNA	4105	166	0	3.29	4.44766	50.11	58	0.399218
SPAC1006.05c.1	SPAC1006.05c	och1	Other	mRNA	2211	90	4	31.1922	42.1679	45.2112	24	0.470897
SPAC1006.06.1	SPAC1006.06	rgf2	Other	mRNA	4239	140	0	37.1864	50.2713	48.6271	103	0.4844
SPAC1006.07.1	SPAC1006.07	tif1	Translation	mRNA	1546	6230	1409	2125.04	2872.78	49.3331	1874	0.39302
SPAC1006.08.1	SPAC1006.08	etd1	Other	mRNA	1591	336	28	26.9245	36.3985	45.8932	250	0.437582
SPAC1006.09.1	SPAC1006.09	win1	Other	mRNA	5034	86	0	34.6511	46.8439	45.3085	41	0.425128
SPAC1039.01.1	SPAC1039.01	-	Other	mRNA	2927	37	0	5.34347	7.22368	48.2133	15	0.464592
SPAC1039.02.1	SPAC1039.02	-	Other	mRNA	2908	610	6	95.7655	129.463	47.0031	237	0.427097
SPAC1039.03.1	SPAC1039.03	-	Other	mRNA	1763	260	17	54.6896	73.9333	51.0826	121	0.345445
SPAC1039.04.1	SPAC1039.04	-	Other	mRNA	2074	55	0	5.00132	6.76115	59.4071	41	0.45526
SPAC1039.05c.1	SPAC1039.05c	klf1	Other	mRNA	2811	106	2	39.5752	53.5006	64.3664	55	0.32517
SPAC1039.06.1	SPAC1039.06	-	Other	mRNA	2157	131	3	21.8605	29.5526	47.4165	20	0.343634
SPAC1039.07c.1	SPAC1039.07c	-	Other	mRNA	1872	192	6	17.4163	23.5446	53.7648	25	0.410367
SPAC1039.08.1	SPAC1039.08	-	Other	mRNA	1310	44	6	2.7988	3.78362	59.9757	37	0.428716
SPAC1039.09.1	SPAC1039.09	isp5	Other	mRNA	3273	16	0	2.86432	3.87219	53.1446	13	0.243776
SPAC1039.10.1	SPAC1039.10	mmf2	Other	mRNA	985	16	0	1.10725	1.49687	55.843	10	0.405144
SPAC1039.11c.1	SPAC1039.11c	gto1	Other	mRNA	3672	40	0	7.94994	10.7473	33.824	5	0.315346
SPAC105.01c.1	SPAC105.01c	kha1	Other	mRNA	3171	158	1	31.5404	42.6386	44.3432	37	0.448251
SPAC105.02c.1	SPAC105.02c	-	Other	mRNA	1303	626	93	137.023	185.238	51.1226	280	0.374266
SPAC105.03c.1	SPAC105.03c	-	Other	mRNA	2775	91	2	33.7918	45.6823	53.7371	17	0.270127
SPAC1071.01c.1	SPAC1071.01c	pta1	Other	mRNA	2609	453	28	86.3103	116.681	46.1328	40	0.336476
SPAC1071.02.1	SPAC1071.02	mms19	Other	mRNA	3382	136	2	23.1984	31.3612	41.4738	72	0.492761
SPAC1071.03c.1	SPAC1071.03c	sil1	Other	mRNA	1829	772	60	79.3343	107.25	48.2798	88	0.38671
SPAC1071.04c.1	SPAC1071.04c	spc2	Other	mRNA	504	69	37	30.9864	41.8896	54.6265	20	0.293918
SPAC1071.05.1	SPAC1071.05	hpm1	Other	mRNA	1692	291	75	107.839	145.784	48.6431	134	0.306787
SPAC1071.06.1	SPAC1071.06	arp9	Other	mRNA	1875	186	19	56.6455	76.5775	49.3853	133	0.332941
SPAC1071.07c.1	SPAC1071.07c	rps1502	Translation	mRNA	767	23957	1185	1704.57	2304.36	35.6645	5099	0.519363
SPAC1071.08.1	SPAC1071.08	rpp203	Translation	mRNA	435	9091	5335	748.009	1011.21	38.77	7472	0.488327
SPAC1071.09c.1	SPAC1071.09c	-	Other	mRNA	2586	515	0	26.0678	35.2403	50.3287	85	0.389227
SPAC1071.10c.1	SPAC1071.10c	pma1	Other	mRNA	4535	1910	0	627.662	848.519	42.592	319	0.471058
SPAC1071.11.1	SPAC1071.11	-	Other	mRNA	2247	142	4	46.9681	63.4949	46.9662	13	0.761638
SPAC1071.12c.1	SPAC1071.12c	stp1	Other	mRNA	902	1156	139	60.6115	81.9389	39.4094	144	0.481201
SPAC1071.13.1	SPAC1071.13	-	Other	mRNA	3806	153	0	9.90765	13.3939	53.9752	105	0.519869
SPAC1093.01.1	SPAC1093.01	ppr5	Other	mRNA	5439	181	0	32.2587	43.6096	45.5931	124	0.30219
SPAC1093.02.1	SPAC1093.02	pdx3	Other	mRNA	1199	1299	101	111.188	150.312	45.496	643	0.366389
SPAC1093.03.1	SPAC1093.03	fig4	Other	mRNA	3509	128	2	17.1477	23.1815	47.5347	30	0.671761
SPAC1093.04c.1	SPAC1093.04c	cca1	Other	mRNA	4668	379	0	15.7734	21.3236	48.6747	154	0.399445
SPAC1093.05.1	SPAC1093.05	hca4	Other	mRNA	2749	579	21	97.0669	131.222	47.2417	368	0.460913
SPAC1093.06c.1	SPAC1093.06c	dhc1	Reproduction	mRNA	12946	69	0	2.15275	2.91024	47.8816	44	0.30669
SPAC1093.07.1	SPAC1093.07	-	Other	mRNA	1992	92	0	3.32003	4.48825	53.0513	55	0.520867
SPAC10F6.01c.1	SPAC10F6.01c	sir1	Other	mRNA	5175	456	2	80.6735	109.06	34.6982	28	0.523622
SPAC10F6.02c.1	SPAC10F6.02c	prp22	Other	mRNA	3766	114	4	20.8083	28.1302	42.637	10	0.318497
SPAC10F6.03c.1	SPAC10F6.03c	cts1	Other	mRNA	2139	1256	157	343.056	463.767	46.35	193	0.471349
SPAC10F6.04.1	SPAC10F6.04	ats1	Other	mRNA	2822	260	0	14.0613	19.0091	57.7159	34	1.01233
SPAC10F6.05c.1	SPAC10F6.05c	ubc6	Other	mRNA	2156	622	1	29.0819	39.315	55.5275	228	0.386245
SPAC10F6.06.1	SPAC10F6.06	vip1	Other	mRNA	1152	2881	184	394.59	533.435	39.7985	2089	0.444303
SPAC10F6.07c.1	SPAC10F6.07c	mug94	Other	mRNA	567	59	39	20.6269	27.8849	62.1195	19	0.291972
SPAC10F6.08c.1	SPAC10F6.08c	nht1	Other	mRNA	1076	113	68	33.1473	44.8109	58.9789	61	0.336221
SPAC10F6.09c.1	SPAC10F6.09c	psm3	Other	mRNA	3851	83	1	26.3868	35.6716	64.2393	14	0.607428
SPAC10F6.10.1	SPAC10F6.10	rio1	Other	mRNA	1715	288	38	61.9167	83.7035	48.4189	105	0.437278
SPAC10F6.11c.1	SPAC10F6.11c	atg17	Other	mRNA	2805	199	0	14.5519	19.6723	41.0245	66	0.718949
SPAC10F6.12c.1	SPAC10F6.12c	mam4	Reproduction	mRNA	1267	299	16	45.2566	61.1812	54.8164	33	0.672722
SPAC10F6.13c.1	SPAC10F6.13c	caa1	Other	mRNA	1516	1478	183	135.604	183.319	45.1927	134	0.443342
SPAC10F6.14c.1	SPAC10F6.14c	-	Other	mRNA	1815	328	88	46.4105	62.741	45.6298	50	0.33191
SPAC10F6.15.1	SPAC10F6.15	-	Other	mRNA	1435	11	5	2.95927	4.00056	61.2755	11	0.360536
SPAC10F6.16.1	SPAC10F6.16	igo1	Reproduction	mRNA	1181	250	28	86.3565	116.743	57.8145	102	0.297989
SPAC10F6.17c.1	SPAC10F6.17c	-	Other	mRNA	2000	236	8	36.3974	49.2047	39.0884	19	0.540107
SPAC110.01.1	SPAC110.01	ppk1	Other	mRNA	5993	39	0	9.59883	12.9764	63.56	26	0.360888
SPAC110.02.1	SPAC110.02	pds5	Reproduction	mRNA	4062	66	0	19.1435	25.8795	47.1107	30	0.436207
SPAC110.03.1	SPAC110.03	cdc42	Reproduction	mRNA	1010	2082	984	379.762	513.389	49.2989	966	0.403638
SPAC110.04c.1	SPAC110.04c	pss1	Other	mRNA	2696	2796	82	554.387	749.46	45.9225	909	0.606694
SPAC110.06.1	SPAC110.06	-	Other	mRNA	1915	34	0	1.38141	1.86749	40.7215	27	0.530604
SPAC1142.01.1	SPAC1142.01	rqc1	Translation	mRNA	2306	305	15	50.5061	68.2778	45.9051	172	0.520716
SPAC1142.02c.1	SPAC1142.02c	-	Other	mRNA	1260	981	94	161.479	218.299	47.1827	676	0.406486
SPAC1142.03c.1	SPAC1142.03c	swi2	Reproduction	mRNA	2490	122	5	28.7316	38.8415	49.1667	18	0.42572
SPAC1142.04.1	SPAC1142.04	noc201	Other	mRNA	2376	824	149	177.604	240.098	47.156	579	0.540457
SPAC1142.05.1	SPAC1142.05	ctr5	Other	mRNA	1280	1881	157	522.988	707.013	50.8566	1067	0.392755
SPAC1142.06.1	SPAC1142.06	get3	Other	mRNA	1706	933	53	177.861	240.446	44.8054	279	0.396821
SPAC1142.07c.1	SPAC1142.07c	vps32	Other	mRNA	1147	927	101	93.003	125.728	45.2436	124	0.633773
SPAC1142.08.1	SPAC1142.08	fhl1	Other	mRNA	2479	86	17	35.2244	47.6189	47.6255	31	0.363026
SPAC1142.09.1	SPAC1142.09	-	Other	mRNA	348	3	1	1.467	1.98319	60.68	3	0.241945
SPAC11D3.01c.1	SPAC11D3.01c	-	Other	mRNA	464	700	121	183.241	247.719	43.3728	102	0.628658
SPAC11D3.02c.1	SPAC11D3.02c	-	Other	mRNA	627	1607	1381	106.367	143.794	41.7522	355	0.394473
SPAC11D3.03c.1	SPAC11D3.03c	-	Other	mRNA	1501	49	0	3.47847	4.70244	63.7889	18	0.463414
SPAC11D3.04c.1	SPAC11D3.04c	-	Other	mRNA	1865	840	3	34.3661	46.4586	39.6204	83	0.587373
SPAC11D3.05.1	SPAC11D3.05	mfs2	Other	mRNA	2013	317	10	22.6519	30.6225	61.1604	168	0.31218
SPAC11D3.06.1	SPAC11D3.06	-	Other	mRNA	1859	182	31	17.3259	23.4224	51.9843	7	0.448414
SPAC11D3.07c.1	SPAC11D3.07c	toe4	Other	mRNA	4256	126	0	10.0214	13.5477	58.5388	16	0.414708
SPAC11D3.08c.1	SPAC11D3.08c	-	Other	mRNA	3465	110	0	14.2312	19.2388	63.2762	16	0.335629
SPAC11D3.09.1	SPAC11D3.09	-	Other	mRNA	1930	23	0	3.13812	4.24233	36.0159	17	0.411241
SPAC11D3.10.1	SPAC11D3.10	-	Other	mRNA	1980	88	1	7.50068	10.14	50.9409	64	0.255616
SPAC11D3.11c.1	SPAC11D3.11c	-	Other	mRNA	2279	108	11	20.2117	27.3236	54.231	30	0.344063
SPAC11D3.13.1	SPAC11D3.13	hsp3104	Other	mRNA	1121	879	60	57.775	78.1045	37.1152	365	0.481435
SPAC11D3.14c.1	SPAC11D3.14c	-	Other	mRNA	4547	77	0	11.498	15.5438	49.867	30	0.38009
SPAC11D3.15.1	SPAC11D3.15	-	Other	mRNA	4227	110	1	22.4861	30.3983	45.9749	70	0.448723
SPAC11D3.16c.1	SPAC11D3.16c	-	Other	mRNA	1273	87	4	41.2335	55.7424	66.8018	22	0.403732
SPAC11D3.17.1	SPAC11D3.17	-	Other	mRNA	3522	217	0	8.78268	11.8731	51.7736	148	0.575798
SPAC11D3.18c.1	SPAC11D3.18c	-	Other	mRNA	2075	37	3	5.51334	7.45333	59.6215	20	0.410884
SPAC11D3.19.1	SPAC11D3.19	-	Other	mRNA	1469	18	0	1.13736	1.53756	56.8256	16	0.621272
SPAC11D3.20.1	SPAC11D3.20	-	Other	mRNA	87	14	14	0.533454	0.721161	47.82	1	0
SPAC11E3.01c.1	SPAC11E3.01c	swr1	Other	mRNA	4026	161	2	26.531	35.8665	31.7961	18	0.412591
SPAC11E3.02c.1	SPAC11E3.02c	ync13	Other	mRNA	4082	180	2	21.2724	28.7576	44.541	52	0.500112
SPAC11E3.03.1	SPAC11E3.03	csm1	Reproduction	mRNA	1098	389	15	20.7537	28.0563	47.7285	299	0.435609
SPAC11E3.04c.1	SPAC11E3.04c	ubc13	Other	mRNA	707	1560	114	143.695	194.258	42.6632	1183	0.501364
SPAC11E3.05.1	SPAC11E3.05	sea3	Other	mRNA	4314	129	0	12.9366	17.4887	40.1811	93	0.406978
SPAC11E3.06.1	SPAC11E3.06	map1	Reproduction	mRNA	1751	19	2	1.60356	2.16781	46.0775	16	0.420755
SPAC11E3.07.1	SPAC11E3.07	vma4	Other	mRNA	1424	4251	191	231.026	312.317	45.4706	2500	0.383133
SPAC11E3.08c.1	SPAC11E3.08c	nse6	Other	mRNA	1746	159	26	19.5238	26.3936	46.4588	16	0.412197
SPAC11E3.09.1	SPAC11E3.09	pyp3	Other	mRNA	1429	301	23	60.3758	81.6204	65.6312	133	0.398002
SPAC11E3.10.1	SPAC11E3.10	-	Other	mRNA	915	1044	89	127.971	173.001	47.1723	708	0.456986
SPAC11E3.11c.1	SPAC11E3.11c	syt22	Other	mRNA	3506	111	1	42.3002	57.1845	50.9462	16	0.32345
SPAC11E3.12.1	SPAC11E3.12	-	Other	mRNA	2837	240	0	6.4618	8.73553	51.2966	135	0.443081
SPAC11E3.13c.1	SPAC11E3.13c	gas5	Other	mRNA	2322	94	2	340.643	460.506	53.6552	29	0.375368
SPAC11E3.14.1	SPAC11E3.14	-	Other	mRNA	3019	89	1	32.3751	43.767	63.88	37	0.475205
SPAC11E3.15.1	SPAC11E3.15	rpl22	Translation	mRNA	550	63506	8160	3756.46	5078.26	35.4877	50891	0.503601
SPAC11G7.01.1	SPAC11G7.01	mtl2	Other	mRNA	3188	121	2	79.0929	106.923	51.4273	66	0.285757
SPAC11G7.02.1	SPAC11G7.02	pub1	Other	mRNA	2871	243	8	137.922	186.453	52.5205	154	0.440364
SPAC11G7.03.1	SPAC11G7.03	idh1	Other	mRNA	1393	903	385	107.114	144.804	43.3959	565	0.397609
SPAC11G7.04.1	SPAC11G7.04	ubi1	Translation	mRNA	627	23106	1877	3925.13	5306.27	38.0005	14557	0.479458
SPAC11G7.05c.1	SPAC11G7.05c	mct1	Other	mRNA	1929	169	1	16.7573	22.6538	75.7971	24	0.940854
SPAC11G7.06c.1	SPAC11G7.06c	mug132	Other	mRNA	3136	176	0	8.57617	11.5939	60.9203	79	0.300913
SPAC11H11.01.1	SPAC11H11.01	sst6	Other	mRNA	1714	83	3	20.3757	27.5453	54.6844	18	0.399982
SPAC11H11.02c.1	SPAC11H11.02c	mug162	Other	mRNA	2910	529	0	11.3076	15.2864	46.2949	111	0.58021
SPAC11H11.03c.1	SPAC11H11.03c	-	Other	mRNA	817	688	451	71.4619	96.6074	57.2164	487	0.405604
SPAC11H11.04.1	SPAC11H11.04	mam2	Reproduction	mRNA	1699	31	4	3.30528	4.46831	58.117	10	0.24138
SPAC11H11.05c.1	SPAC11H11.05c	fta6	Other	mRNA	180	266	259	33.5187	45.313	72.6965	157	0.476723
SPAC11H11.06.1	SPAC11H11.06	arp2	Other	mRNA	1709	973	111	143.074	193.418	51.9618	82	0.441141
SPAC1250.01.1	SPAC1250.01	snf21	Other	mRNA	4006	146	0	29.4033	39.7496	49.0416	32	0.310147
SPAC1250.02.1	SPAC1250.02	mug95	Other	mRNA	837	19	1	3.63188	4.90984	37.63	7	0.201931
SPAC1250.03.1	SPAC1250.03	ubc14	Other	mRNA	965	668	259	81.6632	110.398	48.303	448	0.476333
SPAC1250.04c.1	SPAC1250.04c	atl1	Other	mRNA	890	355	29	19.6332	26.5416	41.3364	105	0.372917
SPAC1250.05.1	SPAC1250.05	rpl3002	Translation	mRNA	607	1766	238	168.018	227.139	62.546	425	0.618625
SPAC1250.07.1	SPAC1250.07	sfc7	Other	mRNA	363	0	0	43.0863	58.2472	0	0	0
SPAC1296.01c.1	SPAC1296.01c	-	Other	mRNA	2146	266	22	57.1588	77.2715	52.0452	75	0.458319
SPAC1296.02.1	SPAC1296.02	cox4	Other	mRNA	762	1475	181	221.089	298.884	44.6222	821	0.445869
SPAC1296.03c.1	SPAC1296.03c	sxa2	Reproduction	mRNA	1854	121	6	6.64616	8.98476	48.3301	67	0.433334
SPAC1296.04.1	SPAC1296.04	mug65	Reproduction	mRNA	1207	209	28	42.9499	58.0627	51.1159	150	0.422463
SPAC1296.05c.1	SPAC1296.05c	lcp1	Other	mRNA	1207	616	20	37.8743	51.2013	43.1566	442	0.474091
SPAC1296.06.1	SPAC1296.06	tah18	Other	mRNA	1961	197	13	30.6248	41.4008	53.2336	25	0.652291
SPAC12B10.01c.1	SPAC12B10.01c	-	Other	mRNA	5352	149	0	16.6148	22.4611	47.2167	36	0.53012
SPAC12B10.02c.1	SPAC12B10.02c	-	Other	mRNA	816	647	442	97.4279	131.71	48.3556	62	0.689852
SPAC12B10.03.1	SPAC12B10.03	bun62	Other	mRNA	2559	104	1	24.7468	33.4545	51.9625	28	0.359274
SPAC12B10.04.1	SPAC12B10.04	pby1	Other	mRNA	1516	764	49	42.446	57.3816	48.6358	488	0.454979
SPAC12B10.05.1	SPAC12B10.05	icp55	Other	mRNA	1718	465	31	39.5083	53.4102	57.1782	182	0.465631
SPAC12B10.06c.1	SPAC12B10.06c	emi5	Other	mRNA	698	951	109	46.0115	62.2017	45.8233	381	0.407212
SPAC12B10.07.1	SPAC12B10.07	acp1	Other	mRNA	1962	1783	10	77.339	104.552	46.8626	1338	0.402302
SPAC12B10.08c.1	SPAC12B10.08c	til1	Translation	mRNA	2352	179	3	9.3926	12.6976	48.7137	99	0.469922
SPAC12B10.09.1	SPAC12B10.09	pet801	Other	mRNA	1020	737	95	31.7138	42.873	47.6428	568	0.607197
SPAC12B10.10.1	SPAC12B10.10	nod1	Other	mRNA	1373	26	0	8.85619	11.9724	54.8483	6	0.198606
SPAC12B10.11.1	SPAC12B10.11	exg2	Other	mRNA	1713	169	13	16.3507	22.104	47.5971	52	0.351483
SPAC12B10.12c.1	SPAC12B10.12c	rhp41	Other	mRNA	2521	222	9	33.4594	45.2328	52.8326	23	0.513767
SPAC12B10.13.1	SPAC12B10.13	gid8	Other	mRNA	1039	457	209	53.1777	71.8895	55.1886	50	0.666646
SPAC12B10.14c.1	SPAC12B10.14c	tea5	Other	mRNA	2099	117	20	34.4817	46.6149	49.9616	19	0.322014
SPAC12B10.15c.1	SPAC12B10.15c	-	Other	mRNA	555	235	214	12.3761	16.7309	37.5753	36	0.550781
SPAC12B10.16c.1	SPAC12B10.16c	mug157	Other	mRNA	2036	257	18	45.681	61.7549	49.4971	119	0.385331
SPAC12G12.01c.1	SPAC12G12.01c	sea4	Other	mRNA	3357	362	6	37.4035	50.5647	46.252	152	0.374223
SPAC12G12.02.1	SPAC12G12.02	efg1	Other	mRNA	2274	1511	6	53.6149	72.4805	47.1697	1133	0.532047
SPAC12G12.03.1	SPAC12G12.03	cip2	Other	mRNA	3093	95	0	80.2092	108.433	57.4	16	0.324511
SPAC12G12.04.1	SPAC12G12.04	mcp60	Other	mRNA	2315	1589	244	464.245	627.6	48.0349	142	0.421634
SPAC12G12.05c.1	SPAC12G12.05c	taf9	Other	mRNA	1478	554	17	48.53	65.6064	42.0072	80	0.37728
SPAC12G12.06c.1	SPAC12G12.06c	rcl1	Other	mRNA	1850	857	50	135.619	183.339	47.4709	516	0.363411
SPAC12G12.07c.1	SPAC12G12.07c	-	Other	mRNA	1470	959	302	156.785	211.954	43.3858	589	0.452417
SPAC12G12.08.1	SPAC12G12.08	mrpl6	Translation	mRNA	1444	562	23	41.5091	56.115	38.5476	59	0.508041
SPAC12G12.09.1	SPAC12G12.09	eti1	Other	mRNA	3007	43	8	18.3821	24.8502	57.07	11	0.34433
SPAC12G12.10.1	SPAC12G12.10	wdr21	Other	mRNA	1350	420	160	55.5551	75.1033	45.0478	67	0.364432
SPAC12G12.11c.1	SPAC12G12.11c	miy1	Other	mRNA	1492	634	32	45.4928	61.5005	45.4864	508	0.485044
SPAC12G12.12.1	SPAC12G12.12	gms2	Other	mRNA	1364	327	32	67.5232	91.2827	44.7192	212	0.442675
SPAC12G12.13c.1	SPAC12G12.13c	cid14	Other	mRNA	2366	404	17	67.0657	90.6642	49.5322	254	0.585026
SPAC12G12.14c.1	SPAC12G12.14c	pfs2	Other	mRNA	2011	122	10	30.4057	41.1046	43.5208	50	0.311344
SPAC12G12.15.1	SPAC12G12.15	sif3	Other	mRNA	2098	159	9	32.5404	43.9905	51.3959	37	0.345725
SPAC12G12.16c.1	SPAC12G12.16c	-	Other	mRNA	2192	150	2	14.842	20.0645	48.9216	76	0.301948
SPAC12G12.17.1	SPAC12G12.17	-	Other	mRNA	690	521	53	31.1421	42.1001	42.4423	60	0.453232
SPAC1327.01c.1	SPAC1327.01c	-	Other	mRNA	3596	126	2	38.0667	51.4613	45.0426	23	0.401459
SPAC139.01c.1	SPAC139.01c	mkt1	Other	mRNA	2828	280	17	83.5733	112.98	49.8408	99	0.542769
SPAC139.02c.1	SPAC139.02c	oac1	Other	mRNA	1591	393	53	94.4107	127.631	49.711	51	0.386151
SPAC139.03.1	SPAC139.03	toe2	Other	mRNA	2361	88	14	25.9867	35.1307	55.7035	60	0.367087
SPAC139.04c.1	SPAC139.04c	fap2	Other	mRNA	1902	177	8	26.9752	36.467	47.7934	41	0.335251
SPAC139.05.1	SPAC139.05	-	Other	mRNA	2183	33	0	4.73034	6.39481	62.954	15	1.18764
SPAC139.06.1	SPAC139.06	hat1	Other	mRNA	1490	593	48	50.6155	68.4256	47.5242	461	0.481439
SPAC1399.01c.1	SPAC1399.01c	-	Other	mRNA	3157	49	0	3.89572	5.26651	53.8837	38	0.338054
SPAC1399.02.1	SPAC1399.02	-	Other	mRNA	2694	67	0	18.2782	24.7098	57.6265	17	0.307444
SPAC1399.03.1	SPAC1399.03	fur4	Other	mRNA	2088	51	11	49.3	66.6473	78.85	6	0.529833
SPAC1399.04c.1	SPAC1399.04c	uck2	Other	mRNA	663	63	50	22.1552	29.951	51.511	39	0.344347
SPAC1399.05c.1	SPAC1399.05c	toe1	Other	mRNA	1662	53	22	18.3743	24.8397	46.4891	32	0.432376
SPAC1399.06.1	SPAC1399.06	-	Other	mRNA	2544	55	0	4.63375	6.26424	44.505	40	0.487575
SPAC13A11.01c.1	SPAC13A11.01c	rga8	Other	mRNA	3621	273	2	56.1322	75.8835	54.1145	98	0.329397
SPAC13A11.02c.1	SPAC13A11.02c	erg11	Other	mRNA	2520	256	9	249.742	337.619	41.1529	24	0.549725
SPAC13A11.03.1	SPAC13A11.03	mcp7	Reproduction	mRNA	1463	306	10	6.89971	9.32753	83.0594	192	0.533489
SPAC13A11.04c.1	SPAC13A11.04c	ubp8	Other	mRNA	1880	217	25	18.9468	25.6137	54.4053	142	0.519942
SPAC13A11.05.1	SPAC13A11.05	ysp2	Other	mRNA	2130	348	23	114.643	154.982	52.578	235	0.36404
SPAC13A11.06.1	SPAC13A11.06	pdc202	Other	mRNA	2141	39	4	4.66056	6.30048	54.1864	25	0.249223
SPAC13C5.01c.1	SPAC13C5.01c	pre9	Other	mRNA	1331	1902	146	183.846	248.536	39.2616	184	0.405462
SPAC13C5.02.1	SPAC13C5.02	dre4	Other	mRNA	1708	261	15	43.4079	58.682	49.3957	60	0.441601
SPAC13C5.03.1	SPAC13C5.03	tht1	Reproduction	mRNA	2668	164	13	21.2918	28.7837	49.7615	41	0.338789
SPAC13C5.04.1	SPAC13C5.04	-	Other	mRNA	977	209	49	22.6352	30.5999	46.3045	42	0.410967
SPAC13C5.05c.1	SPAC13C5.05c	-	Other	mRNA	1823	297	27	37.2455	50.3511	49.4127	165	0.404819
SPAC13C5.06c.1	SPAC13C5.06c	mug121	Other	mRNA	1034	262	78	20.8712	28.2153	57.5231	64	0.319637
SPAC13C5.07.1	SPAC13C5.07	mre11	Reproduction	mRNA	4605	798	0	19.3352	26.1387	74.7156	317	0.488967
SPAC13D1.01c.1	SPAC13D1.01c	Tf2-7	Other	mRNA	4643	47	0	136.038	183.906	50.287	10	0.362864
SPAC13D6.01.1	SPAC13D6.01	pof14	Other	mRNA	1632	119	2	12.7259	17.2038	43.2383	12	0.311355
SPAC13D6.02c.1	SPAC13D6.02c	byr3	Translation	mRNA	1307	1966	407	698.927	944.86	52.9064	170	0.352634
SPAC13D6.03c.1	SPAC13D6.03c	trm9	Other	mRNA	1442	694	31	42.3391	57.237	45.5685	521	0.41018
SPAC13D6.04c.1	SPAC13D6.04c	btb3	Other	mRNA	1826	269	18	29.7627	40.2353	55.441	67	0.412722
SPAC13D6.05.1	SPAC13D6.05	alp11	Other	mRNA	1082	905	60	85.2717	115.276	40.6516	699	0.466347
SPAC13F5.01c.1	SPAC13F5.01c	msh1	Other	mRNA	3190	72	0	11.057	14.9477	54.2039	18	0.71595
SPAC13F5.02c.1	SPAC13F5.02c	taf7	Other	mRNA	1346	694	49	67.0642	90.6622	53.6447	146	0.383208
SPAC13F5.03c.1	SPAC13F5.03c	gld1	Other	mRNA	2410	10	0	4.74696	6.41729	61.0686	7	0.184375
SPAC13F5.04c.1	SPAC13F5.04c	vta1	Other	mRNA	1943	0	0	1.00321	1.35621	0	0	0
SPAC13F5.05.1	SPAC13F5.05	mpd1	Other	mRNA	2333	134	1	26.5473	35.8885	53.6842	97	0.347053
SPAC13F5.06c.1	SPAC13F5.06c	sec10	Other	mRNA	2698	175	17	33.5607	45.3698	59.6561	67	0.367893
SPAC13F5.07c.1	SPAC13F5.07c	hpz2	Other	mRNA	1148	18	6	2.16286	2.92391	84.7044	9	0.406402
SPAC13G6.01c.1	SPAC13G6.01c	rad8	Other	mRNA	4213	243	4	31.6821	42.8301	43.8605	38	0.552783
SPAC13G6.02c.1	SPAC13G6.02c	rps101	Translation	mRNA	1791	19662	133	1239.09	1675.09	39.224	4237	0.468723
SPAC13G6.03.1	SPAC13G6.03	gpi7	Other	mRNA	4139	78	0	18.7032	25.2844	77.7781	32	0.576013
SPAC13G6.04.1	SPAC13G6.04	tim8	Other	mRNA	573	3746	298	79.7807	107.853	38.0094	2881	0.567207
SPAC13G6.05c.1	SPAC13G6.05c	trs33	Other	mRNA	996	355	105	42.9157	58.0166	56.8621	116	0.479745
SPAC13G6.06c.1	SPAC13G6.06c	gcv2	Other	mRNA	4022	85	0	76.17	102.972	37.29	6	0.269307
SPAC13G6.07c.1	SPAC13G6.07c	rps601	Translation	mRNA	1370	14541	455	1846.65	2496.43	41.1327	1821	0.460932
SPAC13G6.08.1	SPAC13G6.08	fzr2	Other	mRNA	2331	18	0	1.51317	2.04561	78.9731	13	0.920777
SPAC13G6.09.1	SPAC13G6.09	trs402	Other	mRNA	1611	901	24	60.5554	81.8632	47.5531	202	0.491119
SPAC13G6.10c.1	SPAC13G6.10c	asl1	Other	mRNA	2126	1313	129	808.789	1093.38	54.4581	182	0.491222
SPAC13G6.11c.1	SPAC13G6.11c	erg12	Other	mRNA	1279	496	202	76.619	103.579	45.4113	320	0.404616
SPAC13G6.12c.1	SPAC13G6.12c	chs1	Reproduction	mRNA	3066	148	6	20.0946	27.1653	45.528	25	0.429502
SPAC13G6.13.1	SPAC13G6.13	-	Other	mRNA	348	9	8	0.200045	0.270435	43.19	8	0.200103
SPAC13G6.14.1	SPAC13G6.14	aps1	Other	mRNA	1397	178	21	109.016	147.376	50.318	112	0.303367
SPAC13G6.15c.1	SPAC13G6.15c	-	Other	mRNA	1618	115	1	11.4879	15.5301	58.6273	70	0.643091
SPAC13G7.01c.1	SPAC13G7.01c	erg7	Other	mRNA	2435	364	55	69.4156	93.841	46.5828	104	0.691823
SPAC13G7.02c.1	SPAC13G7.02c	ssa1	Translation	mRNA	2402	168	1	27.6878	37.4304	47.7563	54	0.407566
SPAC13G7.03.1	SPAC13G7.03	upf3	Translation	mRNA	1085	290	40	31.7388	42.9068	68.1555	51	0.354667
SPAC13G7.04c.1	SPAC13G7.04c	mac1	Other	mRNA	3184	193	0	74.3603	100.526	62.2114	29	0.519214
SPAC13G7.05.1	SPAC13G7.05	are1	Other	mRNA	2224	42	3	23.9461	32.372	52.7863	27	0.333379
SPAC13G7.06.1	SPAC13G7.06	met16	Other	mRNA	1441	1271	67	112.5	152.085	43.5607	481	0.419346
SPAC13G7.07.1	SPAC13G7.07	arb2	Other	mRNA	1208	146	11	17.2887	23.3721	66.9313	103	0.458929
SPAC13G7.08c.1	SPAC13G7.08c	crb3	Other	mRNA	1538	571	133	115.951	156.751	47.5222	271	0.452161
SPAC13G7.09c.1	SPAC13G7.09c	-	Other	mRNA	881	548	94	41.5903	56.2248	45.7803	69	0.577062
SPAC13G7.10.1	SPAC13G7.10	teb1	Other	mRNA	1371	50	19	34.2578	46.3121	36.6877	13	0.509712
SPAC13G7.11.1	SPAC13G7.11	mba1	Other	mRNA	1138	333	38	42.0264	56.8143	47.07	43	0.537122
SPAC13G7.12c.1	SPAC13G7.12c	eki1	Other	mRNA	2864	123	1	57.7052	78.0101	50.2123	13	0.365865
SPAC13G7.13c.1	SPAC13G7.13c	msa1	Reproduction	mRNA	4173	49	0	16.8993	22.8457	56.002	25	0.413158
SPAC140.01.1	SPAC140.01	sdh2	Other	mRNA	1317	530	86	213.217	288.242	50.5923	275	0.4363
SPAC140.02.1	SPAC140.02	gar2	Other	mRNA	2044	4697	267	661.656	894.474	50.7185	2681	0.438671
SPAC140.03.1	SPAC140.03	arb1	Other	mRNA	1522	149	15	12.0143	16.2418	54.1909	113	0.42615
SPAC140.04.1	SPAC140.04	ctr1	Other	mRNA	1767	178	5	16.0086	21.6416	56.1307	14	0.421843
SPAC1420.01c.1	SPAC1420.01c	-	Other	mRNA	2651	431	35	101.898	137.753	57.7971	101	0.400933
SPAC1420.02c.1	SPAC1420.02c	cct5	Other	mRNA	2001	1262	197	236.656	319.929	39.3385	87	0.416768
SPAC1420.03.1	SPAC1420.03	rpn501	Other	mRNA	1540	1311	152	190.177	257.096	47.8887	679	0.443629
SPAC1420.04c.1	SPAC1420.04c	cox1101	Translation	mRNA	2431	33	1	27.978	37.8227	0	0	0
SPAC144.01.1	SPAC144.01	-	Other	mRNA	539	1612	183	98.9344	133.747	39.4506	272	0.462568
SPAC144.02.1	SPAC144.02	iec1	Other	mRNA	1451	460	26	44.6833	60.4061	55.5509	68	0.613614
SPAC144.03.1	SPAC144.03	ade2	Other	mRNA	1373	2330	1376	302.716	409.233	49.9264	812	0.495491
SPAC144.04c.1	SPAC144.04c	spe1	Other	mRNA	1788	756	250	167.628	226.612	37.5214	66	0.434625
SPAC144.05.1	SPAC144.05	-	Other	mRNA	4847	285	0	19.4087	26.2381	56.7775	108	0.401683
SPAC144.06.1	SPAC144.06	apl5	Other	mRNA	3935	236	1	23.3291	31.5379	46.304	136	0.50223
SPAC144.07c.1	SPAC144.07c	gpn2	Other	mRNA	1651	441	28	24.9621	33.7456	47.2217	247	0.33764
SPAC144.08.1	SPAC144.08	jac1	Other	mRNA	2869	299	1	16.0957	21.7593	48.5125	73	0.399971
SPAC144.09c.1	SPAC144.09c	sfc2	Other	mRNA	1785	451	15	24.5703	33.2158	47.5347	95	0.284396
SPAC144.10c.1	SPAC144.10c	gwt1	Other	mRNA	1668	271	60	78.0742	105.546	50.8335	109	0.363284
SPAC144.11.1	SPAC144.11	rps1102	Translation	mRNA	595	6240	2109	1248.44	1687.73	35.5813	4647	0.556889
SPAC144.12.1	SPAC144.12	rki1	Other	mRNA	3059	492	1	130.781	176.799	44.6093	326	0.453713
SPAC144.13c.1	SPAC144.13c	srw1	Other	mRNA	3538	91	0	13.9572	18.8684	43.3153	32	0.39381
SPAC144.14.1	SPAC144.14	klp8	Other	mRNA	1929	133	16	19.5843	26.4755	54.13	7	0.534495
SPAC144.15c.1	SPAC144.15c	cog1	Other	mRNA	4208	174	1	19.1741	25.9209	60.6845	11	0.32461
SPAC144.16.1	SPAC144.16	cia2	Other	mRNA	2425	434	0	27.1095	36.6485	45.1695	204	0.399344
SPAC144.17c.1	SPAC144.17c	-	Other	mRNA	2801	230	0	16.8509	22.7803	48.1577	117	0.445608
SPAC144.18.1	SPAC144.18	vrg4	Other	mRNA	2588	253	3	78.7705	106.488	49.1657	118	0.335085
SPAC144.19.1	SPAC144.19	prl46	Other	mRNA	261	3	3	0	0	43.96	1	0
SPAC1486.01.1	SPAC1486.01	sod2	Other	mRNA	1148	490	45	102.463	138.517	48.0824	270	0.528067
SPAC1486.02c.1	SPAC1486.02c	dsc2	Other	mRNA	1584	220	15	57.3246	77.4955	51.9976	128	0.392459
SPAC1486.03c.1	SPAC1486.03c	ntr1	Other	mRNA	2653	156	17	31.9695	43.2187	53.2606	18	0.465648
SPAC1486.04c.1	SPAC1486.04c	alm1	Other	mRNA	5497	197	0	24.497	33.1168	29.0381	16	0.544206
SPAC1486.05.1	SPAC1486.05	nup189	Other	mRNA	5453	178	1	48.9595	66.187	50.4175	109	0.397423
SPAC1486.06.1	SPAC1486.06	npt1	Other	mRNA	1815	327	69	95.2885	128.818	53.9865	103	0.319706
SPAC1486.07c.1	SPAC1486.07c	mrpl19	Translation	mRNA	665	513	65	73.4891	99.3478	48.1154	99	0.414848
SPAC1486.08.1	SPAC1486.08	cox16	Other	mRNA	2124	684	1	17.5678	23.7494	49.3524	272	0.480319
SPAC1486.09.1	SPAC1486.09	nob1	Other	mRNA	1464	903	80	160.059	216.379	49.0521	459	0.316083
SPAC1486.10.1	SPAC1486.10	thi1	Other	mRNA	2687	114	8	52.663	71.1937	47.9294	65	0.325444
SPAC1486.11.1	SPAC1486.11	fmc1	Other	mRNA	315	355	329	18.0485	24.3993	47.4053	207	0.394445
SPAC14C4.01c.1	SPAC14C4.01c	atg43	Other	mRNA	4252	791	0	20.602	27.8513	48.6389	73	0.437928
SPAC14C4.02c.1	SPAC14C4.02c	smc5	Other	mRNA	3964	144	0	26.7469	36.1584	62.1133	40	0.294143
SPAC14C4.03.1	SPAC14C4.03	mek1	Reproduction	mRNA	1338	18	3	2.15056	2.90728	124.514	17	0.292808
SPAC14C4.04.1	SPAC14C4.04	-	Other	mRNA	1708	506	15	69.901	94.4972	50.5542	185	0.397793
SPAC14C4.05c.1	SPAC14C4.05c	man1	Reproduction	mRNA	3233	100	1	28.7464	38.8614	37.906	15	0.468051
SPAC14C4.06c.1	SPAC14C4.06c	nab2	Other	mRNA	1956	196	4	35.7807	48.3709	55.5909	43	0.436634
SPAC14C4.07.1	SPAC14C4.07	-	Other	mRNA	2566	126	5	34.5999	46.7746	51.7942	60	0.623675
SPAC14C4.08.1	SPAC14C4.08	mug5	Reproduction	mRNA	1163	22	0	7.58211	10.25	59.9962	13	0.217653
SPAC14C4.09.1	SPAC14C4.09	agn1	Other	mRNA	2014	526	39	145.315	196.447	56.2401	232	0.261525
SPAC14C4.10c.1	SPAC14C4.10c	-	Other	mRNA	1619	62	4	11.7531	15.8887	56.277	23	0.427978
SPAC14C4.11.1	SPAC14C4.11	vtc2	Other	mRNA	2729	703	37	188.754	255.171	50.8086	338	0.37947
SPAC14C4.12c.1	SPAC14C4.12c	laf1	Other	mRNA	1806	146	5	52.064	70.3839	57.061	39	0.318906
SPAC14C4.13.1	SPAC14C4.13	rad17	Other	mRNA	2558	144	4	19.8397	26.8207	56.3505	62	0.349694
SPAC14C4.14.1	SPAC14C4.14	atp1	Other	mRNA	4799	1111	0	149.444	202.029	43.8041	536	0.46584
SPAC14C4.15c.1	SPAC14C4.15c	dpp1	Other	mRNA	2696	113	9	23.4979	31.7661	57.9736	14	0.434617
SPAC14C4.16.1	SPAC14C4.16	dad3	Reproduction	mRNA	1066	657	244	26.1658	35.3728	49.5475	488	0.483108
SPAC1527.01.1	SPAC1527.01	mok11	Other	mRNA	7475	42	0	7.85718	10.6219	44.1172	36	0.347878
SPAC1527.02.1	SPAC1527.02	sft2	Other	mRNA	952	531	165	63.9363	86.4337	59.0879	251	0.367323
SPAC1527.03.1	SPAC1527.03	slr1	Translation	mRNA	2501	353	9	70.2281	94.9394	48.7051	231	0.365104
SPAC1556.01c.1	SPAC1556.01c	rad50	Reproduction	mRNA	4103	127	2	11.0059	14.8786	54.618	60	0.474963
SPAC1556.02c.1	SPAC1556.02c	sdh1	Other	mRNA	2126	949	87	294.421	398.019	41.8374	356	0.418614
SPAC1556.03.1	SPAC1556.03	azr1	Other	mRNA	2551	430	3	32.9931	44.6025	49.3215	179	0.289591
SPAC1556.04c.1	SPAC1556.04c	cdd1	Other	mRNA	1795	560	1	2.8441	3.84485	44.618	276	0.492987
SPAC1556.05c.1	SPAC1556.05c	cgr1	Other	mRNA	2981	2333	0	25.8675	34.9695	38.1619	1811	0.511836
SPAC1556.06.1	SPAC1556.06	meu1	Other	mRNA	2331	57	1	3.43449	4.643	87.323	43	0.605829
SPAC1556.07.1	SPAC1556.07	pmm1	Other	mRNA	944	6896	3575	475.019	642.165	38.189	2909	0.481278
SPAC1556.08c.1	SPAC1556.08c	cbs2	Other	mRNA	1389	985	92	134.103	181.289	46.5427	726	0.429247
SPAC1565.01.1	SPAC1565.01	rcf2	Other	mRNA	2923	182	0	36.6616	49.5618	48.7011	57	0.332971
SPAC1565.02c.1	SPAC1565.02c	-	Other	mRNA	1460	221	31	38.3045	51.7828	46.7636	119	0.368076
SPAC1565.03.1	SPAC1565.03	-	Other	mRNA	1036	35	3	6.69726	9.05385	65.7977	30	0.466243
SPAC1565.04c.1	SPAC1565.04c	ste4	Reproduction	mRNA	1161	97	10	5.47652	7.40355	57.9348	50	0.354157
SPAC1565.05.1	SPAC1565.05	utp8	Other	mRNA	2663	363	22	83.2443	112.536	51.5488	84	0.586214
SPAC1565.06c.1	SPAC1565.06c	spg1	Other	mRNA	1194	437	28	65.7287	88.8568	55.7134	318	0.433807
SPAC1565.07c.1	SPAC1565.07c	knd1	Other	mRNA	4643	171	0	13.4244	18.148	42.6124	91	0.663111
SPAC1565.08.1	SPAC1565.08	cdc48	Other	mRNA	3043	899	23	204.569	276.551	48.5481	462	0.432441
SPAC15A10.01.1	SPAC15A10.01	atm1	Other	mRNA	4217	122	0	15.3913	20.807	46.3914	74	0.386263
SPAC15A10.02.1	SPAC15A10.02	taf12	Other	mRNA	2071	340	41	65.4587	88.4918	43.9836	180	0.424182
SPAC15A10.03c.1	SPAC15A10.03c	rad54	Reproduction	mRNA	2909	72	4	21.4503	28.998	40.997	10	0.367149
SPAC15A10.04c.1	SPAC15A10.04c	zpr1	Translation	mRNA	1789	1486	114	220.223	297.713	56.3497	132	0.330765
SPAC15A10.05c.1	SPAC15A10.05c	mug182	Other	mRNA	966	63	15	8.64791	11.6909	61.0135	40	0.37111
SPAC15A10.06.1	SPAC15A10.06	-	Other	mRNA	2026	221	14	50.0299	67.634	46.1685	66	0.352961
SPAC15A10.07.1	SPAC15A10.07	-	Other	mRNA	1266	508	48	50.113	67.7464	50.7069	291	0.35715
SPAC15A10.08.1	SPAC15A10.08	ain1	Other	mRNA	2032	188	31	38.4051	51.9188	56.1327	30	0.381003
SPAC15A10.09c.1	SPAC15A10.09c	pun1	Other	mRNA	1544	201	15	50.9644	68.8973	62.6984	50	0.328445
SPAC15A10.10.1	SPAC15A10.10	mde6	Other	mRNA	3252	165	0	3.77478	5.10301	57.4933	121	0.449243
SPAC15A10.11.1	SPAC15A10.11	ubr11	Other	mRNA	6634	152	0	31.0756	42.0102	36.8955	20	0.505108
SPAC15A10.12c.1	SPAC15A10.12c	tca17	Other	mRNA	1109	1153	32	38.5429	52.105	42.0469	179	0.590371
SPAC15A10.13.1	SPAC15A10.13	ppk3	Other	mRNA	3100	266	2	32.2553	43.605	56.184	196	0.465556
SPAC15A10.15.1	SPAC15A10.15	sgo2	Reproduction	mRNA	2319	213	7	32.3012	43.6671	50.6376	68	0.412826
SPAC15A10.16.1	SPAC15A10.16	bud6	Other	mRNA	4321	43	1	14.8007	20.0086	50.3714	14	0.390226
SPAC15A10.17.1	SPAC15A10.17	coa2	Other	mRNA	261	243	235	198.623	268.512	51.8571	154	0.33588
SPAC15E1.02c.1	SPAC15E1.02c	-	Other	mRNA	560	123	94	28.675	38.765	34.7823	13	0.461086
SPAC15E1.03.1	SPAC15E1.03	rpl42	Translation	mRNA	471	60438	8760	3234.05	4372.02	37.1577	48770	0.461135
SPAC15E1.04.1	SPAC15E1.04	hal3	Other	mRNA	2163	269	6	41.8939	56.6352	49.9238	148	0.314445
SPAC15E1.05c.1	SPAC15E1.05c	ect1	Other	mRNA	1309	420	147	32.7072	44.2159	45.1575	182	0.377714
SPAC15E1.06.1	SPAC15E1.06	vps29	Other	mRNA	1030	1237	98	67.2501	90.9136	43.4801	676	0.532894
SPAC15E1.07c.1	SPAC15E1.07c	moa1	Reproduction	mRNA	519	3	2	0.402403	0.543997	94.6367	3	0.700528
SPAC15E1.08.1	SPAC15E1.08	naa10	Other	mRNA	626	2193	1209	142.16	192.182	41.3963	1738	0.53808
SPAC15E1.09.1	SPAC15E1.09	grx2	Other	mRNA	886	949	80	50.0772	67.698	55.453	366	0.54505
SPAC15E1.10.1	SPAC15E1.10	fub1	Other	mRNA	1090	126	24	18.8622	25.4993	53.0751	81	0.419001
SPAC15F9.01c.1	SPAC15F9.01c	glm1	Other	mRNA	1048	15	2	1.52783	2.06543	50.9927	11	0.571784
SPAC15F9.02.1	SPAC15F9.02	seh1	Other	mRNA	1639	820	23	53.5462	72.3876	42.4209	618	0.420244
SPAC15F9.03c.1	SPAC15F9.03c	nxt2	Other	mRNA	725	1989	68	291.81	394.49	44.1578	1599	0.494466
SPAC16.01.1	SPAC16.01	rho2	Other	mRNA	1375	350	57	57.1608	77.2741	65.305	248	0.34047
SPAC16.02c.1	SPAC16.02c	srp2	Other	mRNA	1781	1769	46	156.352	211.368	49.6645	1278	0.445372
SPAC16.03c.1	SPAC16.03c	ura2	Other	mRNA	1579	467	24	55.6397	75.2177	44.8536	285	0.693028
SPAC16.04.1	SPAC16.04	dus3	Other	mRNA	2063	377	35	91.6286	123.87	50.1376	139	0.368245
SPAC16.05c.1	SPAC16.05c	sfp1	Other	mRNA	2144	87	12	79.5732	107.573	49.5819	16	0.426236
SPAC1610.01.1	SPAC1610.01	saf5	Other	mRNA	1038	739	44	39.972	54.0371	41.7766	517	0.423335
SPAC1610.02c.1	SPAC1610.02c	mrpl1	Translation	mRNA	1095	712	111	90.8925	122.875	48.0616	73	0.38537
SPAC1610.03c.1	SPAC1610.03c	crp79	Other	mRNA	2315	25	0	0.721718	0.97567	45.3375	12	0.26177
SPAC1610.04.1	SPAC1610.04	mug99	Other	mRNA	2092	169	4	24.381	32.96	51.2976	108	0.399431
SPAC1635.01.1	SPAC1635.01	por1	Other	mRNA	1491	951	46	296.921	401.399	44.0677	607	0.55349
SPAC1639.01c.1	SPAC1639.01c	elo1	Other	mRNA	2537	889	4	173.202	234.147	47.5478	472	0.371708
SPAC1639.02c.1	SPAC1639.02c	trk2	Other	mRNA	2851	380	27	37.5793	50.8024	74.871	221	0.432904
SPAC167.01.1	SPAC167.01	ire1	Other	mRNA	3462	137	3	31.9055	43.1322	61.9027	33	0.414052
SPAC167.02.1	SPAC167.02	ptb1	Other	mRNA	3408	221	0	10.2408	13.8443	48.6014	137	0.474068
SPAC167.03c.1	SPAC167.03c	snu66	Other	mRNA	2937	154	0	39.3312	53.1707	46.2203	71	0.469789
SPAC167.04.1	SPAC167.04	pam17	Other	mRNA	1158	1616	79	88.8131	120.064	42.6423	330	0.593869
SPAC167.05.1	SPAC167.05	dbs2	Other	mRNA	3385	137	2	38.3486	51.8424	44.2579	14	0.316835
SPAC167.06c.1	SPAC167.06c	mug143	Other	mRNA	840	150	14	13.343	18.038	46.4273	78	0.455033
SPAC167.07c.1	SPAC167.07c	hul5	Other	mRNA	3694	233	0	17.8845	24.1775	48.3005	179	0.467241
SPAC167.08.1	SPAC167.08	Tf2-2	Other	mRNA	4423	95	0	153.203	207.111	49.1404	23	0.500328
SPAC167.09.1	SPAC167.09	pga1	Other	mRNA	1479	322	2	19.0004	25.6861	46.3247	165	0.523469
SPAC1687.01.1	SPAC1687.01	rpc19	Other	mRNA	622	2145	1209	175.979	237.901	46.6099	1259	0.405351
SPAC1687.02.1	SPAC1687.02	rce1	Other	mRNA	2271	242	2	22.398	30.2792	45.7886	57	0.485122
SPAC1687.03c.1	SPAC1687.03c	rfc4	Other	mRNA	1191	680	122	69.1871	93.5321	49.491	463	0.449592
SPAC1687.04.1	SPAC1687.04	mcb1	Other	mRNA	1978	95	5	24.8711	33.6226	58.3819	31	0.509773
SPAC1687.05.1	SPAC1687.05	pli1	Reproduction	mRNA	3067	100	1	29.1371	39.3896	49.303	33	0.359878
SPAC1687.06c.1	SPAC1687.06c	rpl44	Translation	mRNA	494	14621	6250	2131.78	2881.9	37.5383	1593	0.513761
SPAC1687.07.1	SPAC1687.07	-	Other	mRNA	375	105	82	33.9725	45.9264	52.8459	73	0.313308
SPAC1687.08.1	SPAC1687.08	-	Other	mRNA	291	123	114	21.9293	29.6457	49.863	94	0.364883
SPAC1687.09.1	SPAC1687.09	irs4	Other	mRNA	4836	83	0	26.353	35.6259	45.694	40	0.783459
SPAC1687.10.1	SPAC1687.10	mcp1	Other	mRNA	2321	267	6	31.0636	41.994	49.6683	127	0.420238
SPAC1687.11.1	SPAC1687.11	spb1	Other	mRNA	2625	662	44	162.905	220.227	47.131	371	0.381375
SPAC1687.12c.1	SPAC1687.12c	coq4	Other	mRNA	964	796	301	61.7924	83.5354	41.3293	593	0.497541
SPAC1687.13c.1	SPAC1687.13c	csn5	Other	mRNA	1107	393	86	48.0455	64.9514	51.6092	194	0.504058
SPAC1687.14c.1	SPAC1687.14c	-	Other	mRNA	1211	118	12	19.7752	26.7336	50.6063	51	0.417024
SPAC1687.15.1	SPAC1687.15	gsk3	Other	mRNA	1826	295	51	106.559	144.054	53.8535	139	0.355148
SPAC1687.16c.1	SPAC1687.16c	erg31	Other	mRNA	1597	158	11	74.0475	100.103	49.6357	21	0.503804
SPAC1687.17c.1	SPAC1687.17c	-	Other	mRNA	973	274	49	46.7444	63.1924	49.1029	181	0.434234
SPAC1687.18c.1	SPAC1687.18c	ssl3	Other	mRNA	1813	380	92	47.1016	63.6754	43.982	218	0.479651
SPAC1687.19c.1	SPAC1687.19c	qtr1	Other	mRNA	1424	261	31	60.4738	81.7528	45.4311	166	0.356005
SPAC1687.20c.1	SPAC1687.20c	mis6	Other	mRNA	2175	1	0	10.3597	14.005	39.27	1	0
SPAC1687.21.1	SPAC1687.21	-	Other	mRNA	872	2129	395	173.081	233.984	41.7244	1539	0.633327
SPAC1687.22c.1	SPAC1687.22c	puf3	Other	mRNA	3541	69	0	18.7818	25.3905	59.2745	33	0.382914
SPAC1687.23c.1	SPAC1687.23c	-	Other	mRNA	499	0	0	0.093007	0.125734	0	0	0
SPAC16A10.01.1	SPAC16A10.01	-	Other	mRNA	3432	50	1	24.8618	33.61	53.4579	39	0.332809
SPAC16A10.02.1	SPAC16A10.02	sub1	Other	mRNA	2515	804	2	33.2532	44.954	37.2152	60	0.462274
SPAC16A10.03c.1	SPAC16A10.03c	-	Other	mRNA	4043	142	0	14.9058	20.1507	58.8965	51	0.500304
SPAC16A10.04.1	SPAC16A10.04	rho4	Other	mRNA	1287	268	20	52.4687	70.931	57.5324	185	0.339225
SPAC16A10.05c.1	SPAC16A10.05c	dad1	Reproduction	mRNA	734	587	151	24.0588	32.5245	45.1867	156	0.46747
SPAC16A10.06c.1	SPAC16A10.06c	nse2	Other	mRNA	1043	449	26	30.1023	40.6944	46.1763	345	0.458993
SPAC16A10.07c.1	SPAC16A10.07c	taz1	Reproduction	mRNA	2550	240	7	33.8068	45.7025	50.1148	33	0.47433
SPAC16A10.08c.1	SPAC16A10.08c	mug74	Other	mRNA	1123	45	11	8.86469	11.9839	60.8194	16	0.298052
SPAC16C9.01c.1	SPAC16C9.01c	-	Other	mRNA	1831	251	7	26.1201	35.3111	45.2946	155	0.514812
SPAC16C9.02c.1	SPAC16C9.02c	mta1	Other	mRNA	1269	1844	164	117.123	158.336	43.2653	1243	0.471386
SPAC16C9.03.1	SPAC16C9.03	nmd3	Other	mRNA	1956	583	38	173.399	234.413	49.0105	394	0.357392
SPAC16C9.04c.1	SPAC16C9.04c	mot2	Other	mRNA	1820	364	25	63.0749	85.2692	45.7522	82	0.468535
SPAC16C9.05.1	SPAC16C9.05	cph1	Other	mRNA	1641	329	68	44.954	60.772	50.3864	189	0.899375
SPAC16C9.06c.1	SPAC16C9.06c	upf1	Other	mRNA	2983	159	19	61.2453	82.7959	42.9945	20	0.280117
SPAC16C9.07.1	SPAC16C9.07	pom2	Reproduction	mRNA	3149	152	4	33.6399	45.4768	44.5089	37	0.583478
SPAC16E8.01.1	SPAC16E8.01	shd1	Other	mRNA	4782	118	1	40.5388	54.8033	50.8741	58	0.3476
SPAC16E8.02.1	SPAC16E8.02	mpo1	Other	mRNA	896	52	44	17.5852	23.773	60.45	6	0.26168
SPAC16E8.03.1	SPAC16E8.03	gna1	Other	mRNA	448	72	48	16.4198	22.1974	56.0333	6	0.288438
SPAC16E8.04c.1	SPAC16E8.04c	aro7	Other	mRNA	1396	487	39	72.774	98.3812	45.9983	48	0.375509
SPAC16E8.05c.1	SPAC16E8.05c	-	Other	mRNA	1037	81	17	8.99567	12.161	47.99	11	0.390823
SPAC16E8.06c.1	SPAC16E8.06c	nop12	Other	mRNA	1519	812	284	163.598	221.163	43.0102	452	0.399516
SPAC16E8.07c.1	SPAC16E8.07c	vph1	Other	mRNA	2597	483	74	131.502	177.774	51.7586	109	0.494977
SPAC16E8.08.1	SPAC16E8.08	pos1	Other	mRNA	1389	114	10	51.105	69.0874	67.7302	48	0.293064
SPAC16E8.09.1	SPAC16E8.09	scd1	Reproduction	mRNA	3025	118	7	31.7739	42.9543	40.4772	43	0.411328
SPAC16E8.10c.1	SPAC16E8.10c	rsm7	Translation	mRNA	1012	847	177	77.8247	105.209	43.2928	117	0.586524
SPAC16E8.11c.1	SPAC16E8.11c	tfb1	Other	mRNA	1996	379	58	50.9678	68.902	53.1213	219	0.392562
SPAC16E8.12c.1	SPAC16E8.12c	png3	Other	mRNA	835	713	350	75.7297	102.377	50.314	149	0.416005
SPAC16E8.13.1	SPAC16E8.13	-	Other	mRNA	2649	275	5	30.2045	40.8326	50.4056	144	0.512545
SPAC16E8.14c.1	SPAC16E8.14c	tae1	Translation	mRNA	922	735	76	36.1921	48.9271	40.4871	549	0.644244
SPAC16E8.15.1	SPAC16E8.15	tif45	Translation	mRNA	1296	4370	184	263.691	356.477	43.579	1738	0.50088
SPAC16E8.16.1	SPAC16E8.16	sua7	Other	mRNA	2030	523	19	31.2985	42.3116	69.2211	157	0.307722
SPAC16E8.17c.1	SPAC16E8.17c	-	Other	mRNA	1461	613	56	66.3597	89.7098	47.1611	73	0.44552
SPAC16E8.18.1	SPAC16E8.18	-	Other	mRNA	324	396	272	72.0508	97.4035	54.4208	101	0.37756
SPAC16E8.18c.1	SPAC16E8.18c	tam5	Other	mRNA	632	254	204	54.6718	73.9093	55.4281	103	0.450799
SPAC1705.02.1	SPAC1705.02	-	Other	mRNA	363	1293	1060	53.0588	71.7287	31.956	711	0.73486
SPAC1705.03c.1	SPAC1705.03c	ecm33	Other	mRNA	1955	3901	445	1542.29	2084.98	52.8514	1103	0.343967
SPAC1751.01c.1	SPAC1751.01c	gti1	Other	mRNA	6908	48	0	2.28089	3.08347	42.2121	34	0.455759
SPAC1751.02c.1	SPAC1751.02c	rsm19	Translation	mRNA	1197	1105	51	75.9938	102.734	45.8745	797	0.538194
SPAC1751.03.1	SPAC1751.03	tif313	Translation	mRNA	1357	2781	571	457.829	618.926	42.1526	1736	0.464152
SPAC1751.04.1	SPAC1751.04	loc1	Other	mRNA	1265	1549	13	73.7615	99.7161	46.588	348	0.461082
SPAC1782.01.1	SPAC1782.01	ecm29	Other	mRNA	5365	134	0	21.4881	29.0492	35.4058	12	0.55221
SPAC1782.02c.1	SPAC1782.02c	-	Other	mRNA	1087	1276	55	77.2156	104.386	40.9506	473	0.493073
SPAC1782.03.1	SPAC1782.03	saf3	Other	mRNA	1804	248	11	20.0023	27.0405	48.8823	127	0.402172
SPAC1782.04.1	SPAC1782.04	cox24	Other	mRNA	1161	611	53	108.031	146.044	53.2876	272	0.406578
SPAC1782.05.1	SPAC1782.05	ypa2	Other	mRNA	1386	301	34	28.8475	38.9981	39.94	39	0.427901
SPAC1782.06c.1	SPAC1782.06c	phb1	Other	mRNA	1260	1991	310	147.095	198.854	43.8095	206	0.374095
SPAC1782.07.1	SPAC1782.07	qcr8	Other	mRNA	608	6064	722	360.903	487.894	36.7705	4636	0.499635
SPAC1782.08c.1	SPAC1782.08c	rex3	Other	mRNA	1623	372	172	66.8705	90.4004	41.2058	33	0.457707
SPAC1782.09c.1	SPAC1782.09c	clp1	Other	mRNA	1663	20	5	25.6193	34.634	53.8436	11	0.330423
SPAC1782.10c.1	SPAC1782.10c	nhp2	Other	mRNA	1216	11133	500	441.09	596.298	39.5945	1490	0.505303
SPAC1782.11.1	SPAC1782.11	met14	Other	mRNA	920	4061	411	284.113	384.084	37.889	2060	0.505306
SPAC1782.12c.1	SPAC1782.12c	-	Other	mRNA	1682	442	4	16.8038	22.7166	36.5231	329	0.47317
SPAC1783.01.1	SPAC1783.01	-	Other	mRNA	3632	134	0	31.7858	42.9703	44.4515	59	0.438881
SPAC1783.02c.1	SPAC1783.02c	vps66	Other	mRNA	1288	531	62	37.204	50.2951	47.6579	334	0.473023
SPAC1783.03.1	SPAC1783.03	fta2	Other	mRNA	3030	90	0	9.88712	13.3661	43.8577	26	0.615437
SPAC1783.04c.1	SPAC1783.04c	hst4	Other	mRNA	1495	291	30	64.3848	87.0401	46.7805	57	0.412789
SPAC1783.05.1	SPAC1783.05	hrp1	Other	mRNA	4652	221	0	36.005	48.6742	38.5745	145	0.439319
SPAC1783.06c.1	SPAC1783.06c	atg12	Other	mRNA	724	205	43	16.6667	22.5313	38.8096	23	0.612835
SPAC1783.07c.1	SPAC1783.07c	pap1	Other	mRNA	2783	164	4	79.9968	108.145	42.0671	14	0.547116
SPAC1783.08c.1	SPAC1783.08c	rpl1502	Translation	mRNA	866	7236	454	1097.61	1483.83	46.5138	1324	0.428626
SPAC1786.01c.1	SPAC1786.01c	ptl2	Other	mRNA	2313	395	9	109.997	148.701	46.7513	144	0.437131
SPAC1786.02.1	SPAC1786.02	-	Other	mRNA	3422	352	5	245.94	332.48	51.6218	238	0.329562
SPAC1786.03.1	SPAC1786.03	cut11	Other	mRNA	1929	76	30	41.3219	55.862	54.0996	28	0.252928
SPAC1786.04.1	SPAC1786.04	-	Other	mRNA	461	1	0	0.251684	0.340244	0	0	0
SPAC17A2.01.1	SPAC17A2.01	bsu1	Other	mRNA	2386	42	8	16.6016	22.4432	33.7775	12	0.318124
SPAC17A2.02c.1	SPAC17A2.02c	-	Other	mRNA	1849	842	113	272.74	368.71	46.0949	81	0.484228
SPAC17A2.03c.1	SPAC17A2.03c	vma6	Other	mRNA	2146	1006	26	103.764	140.276	46.398	530	0.403563
SPAC17A2.04c.1	SPAC17A2.04c	cns1	Other	mRNA	1607	481	24	45.443	61.4331	46.9682	55	0.328269
SPAC17A2.05.1	SPAC17A2.05	osm1	Other	mRNA	2109	170	16	47.9179	64.7788	52.4064	50	0.350015
SPAC17A2.06c.1	SPAC17A2.06c	vps8	Other	mRNA	3882	129	1	23.4443	31.6938	59.5871	31	0.451264
SPAC17A2.07c.1	SPAC17A2.07c	-	Other	mRNA	537	48	26	9.63644	13.0272	47.8326	38	0.454239
SPAC17A2.08c.1	SPAC17A2.08c	ntr2	Other	mRNA	1534	265	12	37.2887	50.4096	43.1184	165	0.44355
SPAC17A2.09c.1	SPAC17A2.09c	csx1	Other	mRNA	2339	54	2	62.8992	85.0317	58.5125	8	0.215423
SPAC17A2.10c.1	SPAC17A2.10c	-	Other	mRNA	693	0	0	0.602733	0.814819	0	0	0
SPAC17A2.11.1	SPAC17A2.11	-	Other	mRNA	2014	0	0	0.967845	1.3084	0	0	0
SPAC17A2.12.1	SPAC17A2.12	rrp1	Other	mRNA	4235	169	0	10.5917	14.3186	46.8624	108	0.419504
SPAC17A2.13c.1	SPAC17A2.13c	rad25	Other	mRNA	1055	2111	514	559.543	756.431	45.0569	1434	0.485137
SPAC17A2.14.1	SPAC17A2.14	mnr2	Other	mRNA	2611	172	2	70.2467	94.9646	43.1103	61	0.460408
SPAC17A5.01.1	SPAC17A5.01	pex6	Other	mRNA	3252	122	1	19.8015	26.7691	51.649	31	0.40226
SPAC17A5.02c.1	SPAC17A5.02c	dbr1	Other	mRNA	1773	455	26	45.0362	60.8832	49.7982	141	0.522984
SPAC17A5.03.1	SPAC17A5.03	rpl301	Translation	mRNA	1315	8939	1309	3068.28	4147.92	39.1341	5337	0.455108
SPAC17A5.04c.1	SPAC17A5.04c	mde10	Reproduction	mRNA	1682	109	22	20.3356	27.4912	54.1204	26	0.43531
SPAC17A5.05c.1	SPAC17A5.05c	-	Other	mRNA	744	25	15	16.0316	21.6726	46.8754	13	0.550699
SPAC17A5.06.1	SPAC17A5.06	ptr8	Other	mRNA	2768	128	15	40.3996	54.6151	45.9465	20	0.600666
SPAC17A5.07c.1	SPAC17A5.07c	ulp2	Translation	mRNA	2067	277	17	50.6316	68.4475	54.2614	133	0.473243
SPAC17A5.08.1	SPAC17A5.08	erp2	Other	mRNA	1201	2140	80	152.872	206.664	40.5497	1451	0.43656
SPAC17A5.09c.1	SPAC17A5.09c	glc8	Other	mRNA	1405	126	34	68.1623	92.1467	73.5933	9	0.0679352
SPAC17A5.10.1	SPAC17A5.10	hua1	Other	mRNA	1905	65	2	22.2429	30.0696	53.4253	38	0.254078
SPAC17A5.11.1	SPAC17A5.11	rec12	Reproduction	mRNA	1038	36	13	0.871873	1.17866	67.6924	21	0.34051
SPAC17A5.12.1	SPAC17A5.12	ucp7	Other	mRNA	2094	108	29	29.9762	40.524	48.0712	33	0.450646
SPAC17A5.13.1	SPAC17A5.13	fol2	Other	mRNA	708	280	159	103.604	140.06	61.1822	120	0.395819
SPAC17A5.14.1	SPAC17A5.14	exo2	Other	mRNA	4208	209	4	49.9618	67.542	48.7316	94	0.426589
SPAC17A5.15c.1	SPAC17A5.15c	gus1	Translation	mRNA	2234	862	234	278.515	376.516	39.2683	71	0.415439
SPAC17A5.16.1	SPAC17A5.16	ftp105	Other	mRNA	3500	143	3	34.3968	46.5001	50.8959	75	0.443502
SPAC17A5.18c.1	SPAC17A5.18c	rec25	Reproduction	mRNA	2606	50	0	3.60634	4.87531	69.6004	27	0.970586
SPAC17A5.19.1	SPAC17A5.19	-	Other	mRNA	628	16	2	9.31166	12.5882	32.24	2	0.359695
SPAC17C9.01c.1	SPAC17C9.01c	nuc2	Other	mRNA	2357	309	13	32.7945	44.334	54.9904	187	0.377578
SPAC17C9.02c.1	SPAC17C9.02c	lys7	Other	mRNA	1365	138	39	26.4353	35.7371	53.5284	38	0.364997
SPAC17C9.03.1	SPAC17C9.03	tif471	Translation	mRNA	4686	696	1	251.098	339.452	45.4677	111	0.441444
SPAC17C9.05c.1	SPAC17C9.05c	pmc3	Other	mRNA	1242	198	44	36.041	48.7228	59.7222	115	0.392106
SPAC17C9.06.1	SPAC17C9.06	sam50	Other	mRNA	1949	475	14	55.483	75.0059	49.429	247	0.352464
SPAC17C9.07.1	SPAC17C9.07	alg8	Other	mRNA	2062	129	6	49.359	66.727	55.3917	18	0.233019
SPAC17C9.08.1	SPAC17C9.08	pnu1	Other	mRNA	1286	692	40	44.4617	60.1065	42.8199	136	0.531959
SPAC17C9.09c.1	SPAC17C9.09c	tim13	Other	mRNA	819	2674	92	147.278	199.101	42.7222	1939	0.42771
SPAC17C9.10.1	SPAC17C9.10	stm1	Reproduction	mRNA	2046	501	17	107.316	145.077	49.0698	49	0.52587
SPAC17C9.11c.1	SPAC17C9.11c	-	Other	mRNA	1493	442	5	26.1273	35.3207	49.3636	239	0.453393
SPAC17C9.12.1	SPAC17C9.12	scs22	Other	mRNA	1726	355	6	95.1603	128.645	42.2522	167	0.393984
SPAC17C9.13c.1	SPAC17C9.13c	cut8	Other	mRNA	1529	947	71	125.557	169.737	42.1763	102	0.399452
SPAC17C9.14.1	SPAC17C9.14	pex19	Other	mRNA	1036	416	50	66.5919	90.0237	47.9595	186	0.411987
SPAC17C9.15c.1	SPAC17C9.15c	dhm2	Other	mRNA	1511	341	12	43.6154	58.9624	45.6237	65	0.44974
SPAC17C9.16c.1	SPAC17C9.16c	mfs1	Other	mRNA	2220	179	6	25.8603	34.9598	61.0517	71	0.512503
SPAC17D4.01.1	SPAC17D4.01	pex7	Other	mRNA	1384	385	162	19.4662	26.3159	52.2643	271	0.488905
SPAC17D4.02.1	SPAC17D4.02	cdc45	Other	mRNA	2064	431	58	47.0626	63.6226	41.3514	86	0.360715
SPAC17D4.03c.1	SPAC17D4.03c	cis4	Other	mRNA	2628	212	14	52.2206	70.5956	51.422	25	0.331663
SPAC17D4.04.1	SPAC17D4.04	trm401	Other	mRNA	2285	320	10	74.2161	100.331	44.9615	241	0.444081
SPAC17G6.02c.1	SPAC17G6.02c	tco1	Other	mRNA	2010	1	0	66.9488	90.5063	61.69	1	0
SPAC17G6.02c.2	SPAC17G6.02c	tco1	Other	mRNA	2741	8	2	51.1684	69.1731	61.69	1	0
SPAC17G6.03.1	SPAC17G6.03	-	Other	mRNA	4628	82	0	8.7847	11.8758	46.3995	43	0.395905
SPAC17G6.04c.1	SPAC17G6.04c	cpp1	Other	mRNA	3460	271	0	22.8766	30.9262	49.1014	36	0.295729
SPAC17G6.05c.1	SPAC17G6.05c	bro1	Other	mRNA	2477	33	5	13.3685	18.0726	42.5936	11	0.258449
SPAC17G6.06.1	SPAC17G6.06	rps2401	Translation	mRNA	681	30287	4042	1192.36	1611.92	38.0302	18393	0.504422
SPAC17G6.07c.1	SPAC17G6.07c	use1	Other	mRNA	1219	512	29	50.1035	67.7335	39.5766	50	0.463134
SPAC17G6.08.1	SPAC17G6.08	pep7	Other	mRNA	2231	241	9	29.1028	39.3432	42.05	46	0.365423
SPAC17G6.09.1	SPAC17G6.09	sec62	Other	mRNA	1501	450	74	111.605	150.875	49.5169	182	0.48389
SPAC17G6.10.1	SPAC17G6.10	ssr1	Other	mRNA	1834	256	35	85.4064	115.459	45.5132	38	0.327411
SPAC17G6.11c.1	SPAC17G6.11c	-	Other	mRNA	3728	212	1	45.2527	61.1759	45.1021	28	0.558007
SPAC17G6.12.1	SPAC17G6.12	cul1	Other	mRNA	2346	73	9	33.1758	44.8494	44.5019	26	0.308108
SPAC17G6.13.1	SPAC17G6.13	slt1	Other	mRNA	1516	169	61	42.5072	57.4643	40.9814	28	0.344421
SPAC17G6.14c.1	SPAC17G6.14c	uap56	Other	mRNA	1862	1822	134	370.598	501.002	42.0371	145	0.446156
SPAC17G6.15c.1	SPAC17G6.15c	fsf1	Other	mRNA	1602	653	26	152.833	206.611	53.9257	453	0.44209
SPAC17G6.16c.1	SPAC17G6.16c	ysh1	Other	mRNA	2660	276	6	65.2713	88.2384	49.4908	115	0.346186
SPAC17G6.17.1	SPAC17G6.17	pof8	Other	mRNA	1630	209	10	29.6401	40.0696	46.4222	69	0.383148
SPAC17G8.01c.1	SPAC17G8.01c	trl1	Other	mRNA	2697	222	32	46.4105	62.741	53.4687	23	0.43639
SPAC17G8.02.1	SPAC17G8.02	urh2	Other	mRNA	1980	295	7	28.5026	38.5319	50.027	202	0.349898
SPAC17G8.03c.1	SPAC17G8.03c	bur6	Other	mRNA	1388	312	19	57.8292	78.1777	49.1693	164	0.350004
SPAC17G8.04c.1	SPAC17G8.04c	arc5	Other	mRNA	1196	1552	55	129.006	174.4	47.497	1132	0.55624
SPAC17G8.05.1	SPAC17G8.05	med20	Other	mRNA	1120	330	10	23.4124	31.6506	44.3038	45	0.629554
SPAC17G8.06c.1	SPAC17G8.06c	-	Other	mRNA	2323	1656	124	291.169	393.624	44.7847	163	0.347291
SPAC17G8.07.1	SPAC17G8.07	yaf9	Other	mRNA	1085	316	41	41.8122	56.5247	45.2421	210	0.410761
SPAC17G8.08c.1	SPAC17G8.08c	gdt2	Other	mRNA	1053	2520	640	190.6	257.667	46.7742	1168	0.519651
SPAC17G8.09.1	SPAC17G8.09	shg1	Other	mRNA	915	508	130	37.4581	50.6385	44.3555	58	0.591767
SPAC17G8.10c.1	SPAC17G8.10c	dma1	Other	mRNA	1844	90	9	23.3185	31.5236	45.0929	34	0.318797
SPAC17G8.11c.1	SPAC17G8.11c	imt3	Other	mRNA	2048	58	2	30.049	40.6224	69.6404	24	0.452893
SPAC17G8.12.1	SPAC17G8.12	sec3	Other	mRNA	3740	164	0	23.3293	31.5383	41.3965	101	0.548398
SPAC17G8.13c.1	SPAC17G8.13c	mst2	Reproduction	mRNA	3447	354	0	18.3245	24.7724	52.9739	129	0.540516
SPAC17G8.14c.1	SPAC17G8.14c	pck1	Other	mRNA	3328	96	0	40.0862	54.1914	50.1755	38	0.368827
SPAC17G8.15.1	SPAC17G8.15	wip1	Other	mRNA	222	482	446	24.7732	33.4901	39.5377	186	0.544916
SPAC17H9.01.1	SPAC17H9.01	cid16	Other	mRNA	4156	81	0	8.52608	11.5262	50.813	10	0.157721
SPAC17H9.02.1	SPAC17H9.02	mtl1	Other	mRNA	3364	136	10	33.9111	45.8435	42.7264	96	0.448113
SPAC17H9.03c.1	SPAC17H9.03c	rdl1	Reproduction	mRNA	1236	302	9	21.0086	28.401	45.8445	62	0.442868
SPAC17H9.04c.1	SPAC17H9.04c	nrp1	Other	mRNA	2559	724	26	187.582	253.588	42.9921	67	0.457429
SPAC17H9.05.1	SPAC17H9.05	ebp2	Other	mRNA	3346	2759	2	100.595	135.992	38.5645	1176	0.452088
SPAC17H9.06c.1	SPAC17H9.06c	-	Other	mRNA	2743	171	3	17.5033	23.6623	41.9256	43	0.481547
SPAC17H9.07.1	SPAC17H9.07	srp21	Other	mRNA	1077	1381	25	72.5891	98.1312	50.5254	847	0.464227
SPAC17H9.08.1	SPAC17H9.08	-	Other	mRNA	2677	265	3	26.2132	35.4368	36.2302	55	0.470882
SPAC17H9.09c.1	SPAC17H9.09c	ras1	Reproduction	mRNA	1137	1053	140	81.8408	110.638	46.7951	635	0.400577
SPAC17H9.10c.1	SPAC17H9.10c	ddb1	Other	mRNA	4032	192	1	35.1647	47.5382	47.6808	24	0.382551
SPAC17H9.11.1	SPAC17H9.11	gmf1	Other	mRNA	999	312	18	75.9803	102.716	50.8795	212	0.68223
SPAC17H9.12c.1	SPAC17H9.12c	cyc2	Other	mRNA	1136	707	95	119.438	161.464	53.1524	51	0.450113
SPAC17H9.13c.1	SPAC17H9.13c	pro2	Other	mRNA	1593	549	44	70.5043	95.3128	45.8951	340	0.444608
SPAC17H9.14c.1	SPAC17H9.14c	pdi2	Other	mRNA	1219	3021	1670	286.667	387.538	39.5777	206	0.478063
SPAC17H9.16.1	SPAC17H9.16	tom22	Other	mRNA	1087	4326	225	170.037	229.868	36.044	2821	0.513777
SPAC17H9.17c.1	SPAC17H9.17c	mdm10	Other	mRNA	1193	331	79	24.3334	32.8957	49.7629	151	0.496188
SPAC17H9.18c.1	SPAC17H9.18c	-	Other	mRNA	318	0	0	1.16756	1.57839	0	0	0
SPAC17H9.19c.1	SPAC17H9.19c	cdt2	Reproduction	mRNA	1906	71	13	32.0442	43.3196	50.2367	3	0.045051
SPAC17H9.20.1	SPAC17H9.20	psc3	Other	mRNA	3989	136	0	15.2879	20.6673	52.742	55	0.470522
SPAC1805.01c.1	SPAC1805.01c	ppk6	Other	mRNA	2704	192	10	49.8432	67.3816	52.9204	48	0.470345
SPAC1805.02c.1	SPAC1805.02c	etf2	Other	mRNA	1137	1488	199	158.763	214.627	43.8912	1028	0.494239
SPAC1805.03c.1	SPAC1805.03c	trm13	Other	mRNA	1886	137	5	11.5903	15.6686	51.3649	35	0.351538
SPAC1805.04.1	SPAC1805.04	nup132	Other	mRNA	5862	230	0	22.5996	30.5517	47.8108	114	0.528769
SPAC1805.05.1	SPAC1805.05	cki3	Other	mRNA	1781	493	166	223.14	301.657	51.8133	118	0.399184
SPAC1805.06c.1	SPAC1805.06c	hem2	Other	mRNA	1540	1414	182	112.802	152.493	42.4651	150	0.501014
SPAC1805.07c.1	SPAC1805.07c	dad2	Reproduction	mRNA	858	187	22	15.0104	20.2921	38.0441	122	0.402594
SPAC1805.08.1	SPAC1805.08	dlc1	Reproduction	mRNA	588	846	602	171.592	231.971	45.5562	473	0.461302
SPAC1805.09c.1	SPAC1805.09c	fmt1	Translation	mRNA	1174	107	11	5.87049	7.93615	43.8541	68	0.456291
SPAC1805.10.1	SPAC1805.10	-	Other	mRNA	3796	172	0	9.98877	13.5035	39.4494	35	0.391312
SPAC1805.11c.1	SPAC1805.11c	rps2602	Translation	mRNA	606	11075	2892	1573.71	2127.45	38.0039	8430	0.503664
SPAC1805.12c.1	SPAC1805.12c	uep1	Translation	mRNA	745	16191	2281	1285.01	1737.17	37.3841	5764	0.513771
SPAC1805.13.1	SPAC1805.13	rpl14	Translation	mRNA	607	26906	1882	2712.22	3666.58	35.6479	17626	0.502329
SPAC1805.14.1	SPAC1805.14	-	Other	mRNA	1992	253	29	39.9219	53.9693	43.3353	184	0.436381
SPAC1805.15c.1	SPAC1805.15c	pub2	Other	mRNA	2343	114	8	31.485	42.5637	52.685	20	0.482482
SPAC1805.16c.1	SPAC1805.16c	-	Other	mRNA	1550	177	12	56.3962	76.2405	53.4587	23	0.337533
SPAC1805.17.1	SPAC1805.17	crm1	Other	mRNA	4102	396	1	67.9016	91.7943	51.2937	254	0.535263
SPAC1805.18.1	SPAC1805.18	pop6	Other	mRNA	288	559	498	88.8728	120.145	50.4803	162	0.464931
SPAC1834.01.1	SPAC1834.01	erf1	Translation	mRNA	1936	1907	129	269.833	364.779	43.171	1137	0.436707
SPAC1834.02.1	SPAC1834.02	aro1	Other	mRNA	4926	219	0	54.871	74.1786	45.7774	100	0.32091
SPAC1834.03c.1	SPAC1834.03c	hhf1	Other	mRNA	772	9466	3514	1086.38	1468.64	50.0352	3250	0.398945
SPAC1834.04.1	SPAC1834.04	hht1	Other	mRNA	870	9680	3383	1083.58	1464.86	46.485	2099	0.457205
SPAC1834.05.1	SPAC1834.05	alg9	Other	mRNA	2488	259	14	80.1737	108.385	54.596	62	0.928754
SPAC1834.06c.1	SPAC1834.06c	pmo25	Other	mRNA	1404	892	51	91.9615	124.32	51.1734	575	0.427886
SPAC1834.07.1	SPAC1834.07	klp3	Other	mRNA	2081	235	15	22.3801	30.255	48.2886	169	0.417117
SPAC1834.08.1	SPAC1834.08	mak1	Other	mRNA	5435	72	0	28.9692	39.1626	54.8294	52	0.574569
SPAC1834.09.1	SPAC1834.09	mug51	Other	mRNA	1212	142	22	20.7162	28.0057	50.671	96	0.375642
SPAC1834.10c.1	SPAC1834.10c	-	Other	mRNA	718	800	276	66.9009	90.4415	39.0318	161	0.822216
SPAC1834.11c.1	SPAC1834.11c	sec18	Other	mRNA	3085	262	4	55.5271	75.0655	39.0728	18	0.41967
SPAC1834.13.1	SPAC1834.13	-	Other	mRNA	1131	12	1	1.45674	1.96932	32.37	5	0.159441
SPAC1851.02.1	SPAC1851.02	slc1	Other	mRNA	1085	1867	539	163.677	221.271	44.9885	928	0.451885
SPAC1851.03.1	SPAC1851.03	ckb1	Other	mRNA	3057	741	4	57.5159	77.7541	49.4358	134	0.381498
SPAC1851.04c.1	SPAC1851.04c	ric1	Other	mRNA	3443	100	3	20.5834	27.8262	42.68	6	0.430511
SPAC186.01.1	SPAC186.01	pfl9	Other	mRNA	1498	25	5	2.66442	3.60195	51.707	23	0.200178
SPAC186.02c.1	SPAC186.02c	-	Other	mRNA	1294	2	0	0.0358659	0.0484861	0	0	0
SPAC186.03.1	SPAC186.03	-	Other	mRNA	1372	3	0	8.69351	11.7525	61.39	3	0.214358
SPAC186.04c.1	SPAC186.04c	-	Other	mRNA	1037	79	10	10.2264	13.8248	28.9236	14	0.501893
SPAC186.05c.1	SPAC186.05c	gdt1	Other	mRNA	1471	337	72	75.3263	101.832	42.0209	55	0.334384
SPAC186.06.1	SPAC186.06	-	Other	mRNA	742	34	16	3.4714	4.69289	43.0054	26	0.475033
SPAC186.07c.1	SPAC186.07c	-	Other	mRNA	999	5	0	0.534255	0.722244	31.966	5	0.0529457
SPAC186.08c.1	SPAC186.08c	-	Other	mRNA	993	7	4	1.35539	1.83232	31.22	6	0.441858
SPAC186.09.1	SPAC186.09	pdc102	Other	mRNA	1719	22	1	2.96984	4.01484	56.5965	17	0.333755
SPAC18B11.02c.1	SPAC18B11.02c	pus9	Other	mRNA	1362	937	133	100.846	136.33	45.2048	279	0.630425
SPAC18B11.03c.1	SPAC18B11.03c	-	Other	mRNA	2060	177	7	18.8345	25.4619	57.5135	37	0.502057
SPAC18B11.04.1	SPAC18B11.04	ncs1	Other	mRNA	1353	722	40	81.124	109.669	58.23	465	0.440869
SPAC18B11.05.1	SPAC18B11.05	gpi18	Other	mRNA	1817	305	16	53.7284	72.6339	54.5351	181	0.390684
SPAC18B11.06.1	SPAC18B11.06	lcp5	Other	mRNA	1268	1019	165	154.512	208.881	48.4072	76	0.382892
SPAC18B11.07c.1	SPAC18B11.07c	rhp6	Other	mRNA	748	1862	595	149.903	202.65	46.9718	1305	0.584678
SPAC18B11.08c.1	SPAC18B11.08c	-	Other	mRNA	535	936	66	146.432	197.957	52.442	712	0.527237
SPAC18B11.09c.1	SPAC18B11.09c	-	Other	mRNA	923	148	24	17.2468	23.3155	57.3972	92	0.496549
SPAC18B11.10.1	SPAC18B11.10	tup11	Other	mRNA	2321	337	14	58.428	78.9872	47.5482	137	0.343941
SPAC18B11.11.1	SPAC18B11.11	-	Other	mRNA	4564	85	0	12.8178	17.328	55.2695	37	0.247139
SPAC18G6.01c.1	SPAC18G6.01c	-	Other	mRNA	1800	200	3	16.7851	22.6913	33.1341	17	0.574105
SPAC18G6.02c.1	SPAC18G6.02c	chp1	Other	mRNA	3855	126	1	23.4219	31.6635	44.1018	22	0.58748
SPAC18G6.03.1	SPAC18G6.03	ypt3	Reproduction	mRNA	1146	2179	232	389.974	527.194	44.6069	476	0.474353
SPAC18G6.04c.1	SPAC18G6.04c	shm2	Other	mRNA	1901	637	28	76.4882	103.402	42.91	318	0.487293
SPAC18G6.05c.1	SPAC18G6.05c	gcn1	Translation	mRNA	8171	197	0	27.0505	36.5689	31.1452	23	0.694372
SPAC18G6.06.1	SPAC18G6.06	utp11	Other	mRNA	1137	1198	153	121.598	164.385	49.0863	941	0.362749
SPAC18G6.07c.1	SPAC18G6.07c	mra1	Other	mRNA	1534	1299	89	204.006	275.791	45.4287	86	0.459258
SPAC18G6.09c.1	SPAC18G6.09c	edc1	Reproduction	mRNA	2554	12	0	39.3689	53.2218	63.06	2	0
SPAC18G6.10.1	SPAC18G6.10	lem2	Reproduction	mRNA	2512	165	15	46.8631	63.353	46.6345	110	0.410447
SPAC18G6.11c.1	SPAC18G6.11c	rrn3	Other	mRNA	2454	322	18	106.92	144.542	56.3046	106	0.324864
SPAC18G6.12c.1	SPAC18G6.12c	-	Other	mRNA	1295	193	17	31.3047	42.3199	50.1283	24	0.409215
SPAC18G6.13.1	SPAC18G6.13	-	Other	mRNA	345	129	110	14.9993	20.2772	41.7046	103	0.757215
SPAC18G6.14c.1	SPAC18G6.14c	rps7	Translation	mRNA	807	16010	1523	4352.06	5883.43	39.7472	4959	0.441943
SPAC18G6.15.1	SPAC18G6.15	mal3	Reproduction	mRNA	1603	573	58	97.931	132.39	48.5637	373	0.449022
SPAC1952.01.1	SPAC1952.01	gab1	Other	mRNA	1723	98	27	28.2557	38.1981	44.9463	43	0.353319
SPAC1952.02.1	SPAC1952.02	tma23	Other	mRNA	771	1577	1121	224.498	303.492	46.074	1079	0.466503
SPAC1952.03.1	SPAC1952.03	otu2	Other	mRNA	1440	1639	24	46.4266	62.7628	45.7179	1072	0.472267
SPAC1952.04c.1	SPAC1952.04c	-	Other	mRNA	550	289	173	63.3714	85.67	63.4686	203	0.297669
SPAC1952.05.1	SPAC1952.05	gcn5	Reproduction	mRNA	2098	159	13	27.2645	36.8581	46.1326	92	0.310366
SPAC1952.06c.1	SPAC1952.06c	-	Other	mRNA	2519	305	11	38.1012	51.5079	42.8207	41	0.524561
SPAC1952.07.1	SPAC1952.07	rad1	Reproduction	mRNA	1543	468	24	18.0468	24.397	50.1011	110	0.571916
SPAC1952.08c.1	SPAC1952.08c	-	Other	mRNA	2661	431	1	51.6864	69.8734	56.1248	64	0.434329
SPAC1952.09c.1	SPAC1952.09c	-	Other	mRNA	2821	98	1	28.6261	38.6988	49.9095	22	0.289379
SPAC1952.10c.1	SPAC1952.10c	-	Other	mRNA	2194	182	6	21.4072	28.9398	64.2203	37	0.629034
SPAC1952.11c.1	SPAC1952.11c	ure2	Other	mRNA	3130	134	2	34.793	47.0357	47.2717	12	0.425637
SPAC1952.12c.1	SPAC1952.12c	csn71	Other	mRNA	1286	287	27	41.2317	55.74	50.9136	44	0.306755
SPAC1952.13.1	SPAC1952.13	ned1	Other	mRNA	2306	158	10	41.7714	56.4696	51.0077	112	0.29468
SPAC1952.14c.1	SPAC1952.14c	mrpl25	Translation	mRNA	799	1002	218	75.6276	102.239	46.4162	145	0.367382
SPAC1952.15c.1	SPAC1952.15c	rec24	Reproduction	mRNA	2291	94	0	3.61601	4.88838	44.587	47	0.41133
SPAC1952.16.1	SPAC1952.16	rga9	Other	mRNA	5037	274	0	21.9291	29.6454	53.3079	131	0.345304
SPAC1952.17c.1	SPAC1952.17c	tbc13	Other	mRNA	2311	180	7	18.2449	24.6647	48.1269	29	0.498805
SPAC19A8.01c.1	SPAC19A8.01c	sec73	Other	mRNA	4280	59	0	17.3389	23.4399	53.9505	40	0.3527
SPAC19A8.02.1	SPAC19A8.02	sip3	Other	mRNA	3901	86	5	30.1829	40.8034	57.7875	32	0.403282
SPAC19A8.03.1	SPAC19A8.03	ymr1	Other	mRNA	2440	76	8	31.679	42.8259	57.7722	27	0.288233
SPAC19A8.04.1	SPAC19A8.04	erg5	Other	mRNA	1814	1135	409	314.243	424.816	42.1859	571	0.414022
SPAC19A8.05c.1	SPAC19A8.05c	sst4	Reproduction	mRNA	2168	98	19	30.2482	40.8916	47.8155	66	0.37904
SPAC19A8.06.1	SPAC19A8.06	pbr1	Other	mRNA	1235	522	208	52.1037	70.4376	47.4579	28	0.800419
SPAC19A8.07c.1	SPAC19A8.07c	imp4	Other	mRNA	1146	1763	318	191.129	258.382	44.3148	833	0.40521
SPAC19A8.08.1	SPAC19A8.08	upf2	Other	mRNA	3486	157	5	28.9832	39.1816	56.4107	14	0.349681
SPAC19A8.09.1	SPAC19A8.09	yos1	Other	mRNA	484	710	563	46.2666	62.5466	43.779	543	0.510243
SPAC19A8.10.1	SPAC19A8.10	rfp1	Other	mRNA	1978	573	9	28.7895	38.9197	46.336	92	0.432791
SPAC19A8.11c.1	SPAC19A8.11c	irc6	Other	mRNA	5053	307	0	6.70027	9.0579	47.0302	108	0.444054
SPAC19A8.12.1	SPAC19A8.12	dcp2	Other	mRNA	2886	98	2	41.6665	56.3278	38.2863	8	0.484557
SPAC19A8.13.1	SPAC19A8.13	usp101	Other	mRNA	1118	454	75	61.3133	82.8877	37.9065	43	0.435495
SPAC19A8.14.1	SPAC19A8.14	pth2	Translation	mRNA	858	1431	475	65.7752	88.9197	41.0185	103	0.517709
SPAC19A8.15.1	SPAC19A8.15	trp2	Other	mRNA	2323	593	54	146.913	198.608	39.4657	53	0.412883
SPAC19A8.16.1	SPAC19A8.16	prl65	Other	mRNA	418	151	94	15.9883	21.6141	44.4412	103	0.478301
SPAC19B12.01.1	SPAC19B12.01	-	Other	mRNA	2703	430	93	56.6094	76.5287	41.3575	51	0.391685
SPAC19B12.02c.1	SPAC19B12.02c	gas1	Other	mRNA	2220	1058	41	737.278	996.706	49.4176	125	0.343477
SPAC19B12.03.1	SPAC19B12.03	bgs3	Other	mRNA	7102	135	0	41.8394	56.5615	48.1404	84	0.482105
SPAC19B12.04.1	SPAC19B12.04	rps3001	Translation	mRNA	592	14670	601	784.431	1060.45	34.7844	4252	0.525131
SPAC19B12.05c.1	SPAC19B12.05c	fcp1	Other	mRNA	2775	351	14	51.2104	69.2299	46.8488	111	0.557554
SPAC19B12.06c.1	SPAC19B12.06c	rbd4	Other	mRNA	1207	2577	148	175.414	237.137	42.2991	672	0.448938
SPAC19B12.07c.1	SPAC19B12.07c	-	Other	mRNA	1533	360	18	22.6906	30.6748	49.887	93	0.490057
SPAC19B12.08.1	SPAC19B12.08	atg4	Other	mRNA	1894	59	5	31.3405	42.3684	61.5309	34	0.348627
SPAC19B12.09.1	SPAC19B12.09	srp14	Other	mRNA	761	2663	65	110.354	149.185	36.381	1869	0.548202
SPAC19B12.10.1	SPAC19B12.10	sst2	Other	mRNA	2442	100	4	21.4283	28.9683	50.5273	41	0.567787
SPAC19B12.11c.1	SPAC19B12.11c	bud20	Other	mRNA	807	1668	303	163.156	220.565	42.9927	1262	0.448461
SPAC19B12.12c.1	SPAC19B12.12c	yip11	Other	mRNA	1995	157	4	13.6323	18.4292	46.8297	92	0.404507
SPAC19B12.13.1	SPAC19B12.13	cox1102	Translation	mRNA	2403	1	0	25.6967	34.7386	35.41	1	0
SPAC19D5.01.1	SPAC19D5.01	pyp2	Other	mRNA	2837	50	0	10.4943	14.1869	50.3364	36	0.399826
SPAC19D5.02c.1	SPAC19D5.02c	pex22	Other	mRNA	1134	856	78	86.8662	117.432	50.7666	187	0.579879
SPAC19D5.03.1	SPAC19D5.03	cid1	Other	mRNA	1623	233	70	31.9269	43.161	55.2946	182	0.446011
SPAC19D5.04.1	SPAC19D5.04	ptr1	Other	mRNA	10097	309	0	14.4605	19.5487	42.1958	59	0.516689
SPAC19D5.05c.1	SPAC19D5.05c	imp3	Other	mRNA	740	1244	566	154.973	209.504	48.8385	875	0.393568
SPAC19D5.06c.1	SPAC19D5.06c	din1	Other	mRNA	1164	123	73	38.6156	52.2033	48.4527	22	0.427781
SPAC19D5.07.1	SPAC19D5.07	uga1	Other	mRNA	2349	55	2	10.511	14.2095	44.757	37	0.364097
SPAC19D5.09c.1	SPAC19D5.09c	Tf2-8	Other	mRNA	4002	0	0	137.573	185.981	0	0	0
SPAC19D5.10c.1	SPAC19D5.10c	-	Other	mRNA	264	23	1	12.8332	17.3488	53.17	7	0.429899
SPAC19D5.11c.1	SPAC19D5.11c	ctf8	Other	mRNA	516	206	85	29.0515	39.2739	49.1687	126	0.343564
SPAC19E9.01c.1	SPAC19E9.01c	nup40	Other	mRNA	2019	645	20	77.5807	104.879	49.1966	122	0.856372
SPAC19E9.02.1	SPAC19E9.02	fin1	Other	mRNA	2667	186	25	58.1654	78.6321	55.5794	132	0.360594
SPAC19E9.03.1	SPAC19E9.03	pas1	Other	mRNA	3109	148	2	59.7111	80.7218	46.2595	115	0.392099
SPAC19G12.01c.1	SPAC19G12.01c	cut20	Other	mRNA	2579	235	3	16.6369	22.4909	56.1101	108	0.585576
SPAC19G12.02c.1	SPAC19G12.02c	pms1	Reproduction	mRNA	4301	309	0	14.8641	20.0943	51.8767	61	0.383743
SPAC19G12.03.1	SPAC19G12.03	cda1	Reproduction	mRNA	2099	256	0	15.1238	20.4454	58.3004	82	0.315976
SPAC19G12.04.1	SPAC19G12.04	dal1	Other	mRNA	1665	321	9	13.9371	18.8411	41.2496	196	0.482834
SPAC19G12.05.1	SPAC19G12.05	mce1	Other	mRNA	1270	320	139	128.743	174.045	54.0946	98	0.347068
SPAC19G12.06c.1	SPAC19G12.06c	hta2	Other	mRNA	952	7137	2797	1270.41	1717.44	46.816	1571	0.398846
SPAC19G12.07c.1	SPAC19G12.07c	rsd1	Other	mRNA	2673	192	6	36.0449	48.7282	62.409	89	0.483681
SPAC19G12.08.1	SPAC19G12.08	scs7	Other	mRNA	1734	286	59	280.939	379.793	53.3219	205	0.33767
SPAC19G12.09.1	SPAC19G12.09	-	Other	mRNA	1213	453	54	86.5844	117.051	37.8423	117	0.476063
SPAC19G12.10c.1	SPAC19G12.10c	cpy1	Other	mRNA	3576	475	3	425.54	575.275	45.4425	57	0.463997
SPAC19G12.11.1	SPAC19G12.11	coq9	Other	mRNA	1494	549	28	77.1023	104.232	46.7277	237	0.408444
SPAC19G12.12.1	SPAC19G12.12	dlp1	Other	mRNA	1432	380	16	36.4121	49.2245	42.8878	193	0.407486
SPAC19G12.13c.1	SPAC19G12.13c	poz1	Other	mRNA	2235	217	2	10.8395	14.6536	51.7724	63	0.438268
SPAC19G12.14.1	SPAC19G12.14	its3	Reproduction	mRNA	2751	155	9	64.6811	87.4406	59.9652	27	0.550815
SPAC19G12.15c.1	SPAC19G12.15c	tpp1	Other	mRNA	2917	315	17	100.959	136.484	50.2219	37	0.2969
SPAC19G12.16c.1	SPAC19G12.16c	adg2	Other	mRNA	2741	510	13	299.585	405.001	56.2835	144	0.319646
SPAC19G12.17.1	SPAC19G12.17	erh1	Other	mRNA	315	671	610	82.9495	112.137	46.5193	363	0.486863
SPAC1A6.01c.1	SPAC1A6.01c	-	Other	mRNA	3761	252	0	19.1701	25.9155	51.1679	39	0.415471
SPAC1A6.02.1	SPAC1A6.02	wdr55	Other	mRNA	1568	839	45	50.3471	68.0628	36.0256	94	0.441727
SPAC1A6.03c.1	SPAC1A6.03c	-	Other	mRNA	2421	381	97	175.664	237.475	53.2654	79	0.370428
SPAC1A6.04c.1	SPAC1A6.04c	plb1	Other	mRNA	3184	3284	72	1221.45	1651.24	42.7806	364	0.548141
SPAC1A6.05c.1	SPAC1A6.05c	ptl3	Other	mRNA	1990	357	29	55.5293	75.0685	48.6358	205	0.475972
SPAC1A6.06c.1	SPAC1A6.06c	meu31	Other	mRNA	1650	120	1	2.27833	3.08001	43.5272	39	0.418184
SPAC1A6.07.1	SPAC1A6.07	sle1	Other	mRNA	2359	264	6	80.9478	109.431	56.0197	63	0.371905
SPAC1A6.08c.1	SPAC1A6.08c	mug125	Other	mRNA	1264	100	10	17.5508	23.7264	45.7042	12	0.212101
SPAC1A6.09c.1	SPAC1A6.09c	lag1	Other	mRNA	1969	748	153	132.325	178.887	46.961	132	0.356098
SPAC1A6.10.1	SPAC1A6.10	tcd1	Other	mRNA	1626	551	61	93.9484	127.006	40.694	393	0.389866
SPAC1A6.11.1	SPAC1A6.11	-	Other	mRNA	905	15	0	1.38462	1.87183	46.5079	14	0.399316
SPAC1B1.01.1	SPAC1B1.01	deb1	Other	mRNA	1891	217	22	87.3847	118.133	49.1996	110	0.351958
SPAC1B1.02c.1	SPAC1B1.02c	-	Other	mRNA	2169	95	12	30.9189	41.7984	57.6475	12	0.956852
SPAC1B1.03c.1	SPAC1B1.03c	kap95	Other	mRNA	2905	449	60	97.1105	131.281	45.807	56	0.488371
SPAC1B1.04c.1	SPAC1B1.04c	pan3	Other	mRNA	2959	174	0	40.5758	54.8533	63.49	86	0.372249
SPAC1B2.02c.1	SPAC1B2.02c	ugo1	Other	mRNA	1705	422	76	78.3806	105.961	47.4079	33	0.36869
SPAC1B2.03c.1	SPAC1B2.03c	elo2	Other	mRNA	2210	434	7	121.801	164.66	50.1868	99	0.378982
SPAC1B2.04.1	SPAC1B2.04	cox6	Other	mRNA	988	2125	72	186.746	252.456	44.1937	1569	0.473766
SPAC1B2.05.1	SPAC1B2.05	mcm5	Other	mRNA	4968	182	0	22.925	30.9916	41.8972	65	0.487255
SPAC1B2.06.1	SPAC1B2.06	-	Other	mRNA	869	291	21	18.8793	25.5224	45.0948	223	0.576046
SPAC1B3.01c.1	SPAC1B3.01c	-	Other	mRNA	1886	2525	31	80.0002	108.15	41.0842	1821	0.49025
SPAC1B3.02c.1	SPAC1B3.02c	-	Other	mRNA	1252	2545	157	105.74	142.946	43.6828	1844	0.537523
SPAC1B3.03c.1	SPAC1B3.03c	wis2	Other	mRNA	1377	2514	370	219.818	297.166	38.0476	234	0.46372
SPAC1B3.04c.1	SPAC1B3.04c	guf1	Translation	mRNA	2292	93	15	19.4491	26.2927	45.9969	16	0.363367
SPAC1B3.05.1	SPAC1B3.05	not3	Translation	mRNA	2302	585	28	82.3574	111.337	44.2773	327	0.434767
SPAC1B3.06c.1	SPAC1B3.06c	-	Other	mRNA	1428	643	19	40.2517	54.4151	38.9476	204	0.481942
SPAC1B3.07c.1	SPAC1B3.07c	vps28	Other	mRNA	1261	462	43	39.1048	52.8647	42.8024	37	0.371942
SPAC1B3.08.1	SPAC1B3.08	-	Other	mRNA	2031	468	28	85.0973	115.041	48.6433	312	0.3808
SPAC1B3.09c.1	SPAC1B3.09c	noc202	Other	mRNA	1683	571	172	114.427	154.69	36.529	51	0.360302
SPAC1B3.10c.1	SPAC1B3.10c	-	Other	mRNA	1995	12	0	11.3409	15.3315	48.02	6	0.209061
SPAC1B3.11c.1	SPAC1B3.11c	ypt4	Other	mRNA	1650	249	8	13.2481	17.9097	47.3423	172	0.461972
SPAC1B3.12c.1	SPAC1B3.12c	rpb10	Other	mRNA	761	2702	179	287.001	387.989	42.5187	2091	0.414855
SPAC1B3.13.1	SPAC1B3.13	nan1	Other	mRNA	2692	567	45	138.749	187.57	46.4592	329	0.381688
SPAC1B3.14.1	SPAC1B3.14	vma3	Other	mRNA	810	3959	964	431.904	583.879	45.364	2771	0.493069
SPAC1B3.15c.1	SPAC1B3.15c	-	Other	mRNA	3121	110	0	55.8755	75.5365	43.991	21	0.414157
SPAC1B3.16c.1	SPAC1B3.16c	vht1	Other	mRNA	2336	246	11	238.966	323.052	40.7996	23	0.327525
SPAC1B3.17.1	SPAC1B3.17	clr2	Other	mRNA	2455	88	14	26.4568	35.7662	55.7256	9	0.480042
SPAC1B3.18c.1	SPAC1B3.18c	mrps18	Translation	mRNA	1409	468	10	29.513	39.8978	44.2593	71	0.396586
SPAC1B3.20.1	SPAC1B3.20	-	Other	mRNA	513	907	129	24.4266	33.0216	39.4358	301	0.515163
SPAC1B3.21.1	SPAC1B3.21	coa3	Other	mRNA	210	0	0	10.1661	13.7433	0	0	0
SPAC1B9.02c.1	SPAC1B9.02c	sck1	Reproduction	mRNA	2585	121	2	38.9956	52.717	52.4468	25	0.463806
SPAC1B9.03c.1	SPAC1B9.03c	-	Other	mRNA	1306	1560	380	186.21	251.733	46.1269	889	0.437673
SPAC1D4.01.1	SPAC1D4.01	tls1	Other	mRNA	1876	497	25	20.8427	28.1766	44.7398	111	0.379126
SPAC1D4.02c.1	SPAC1D4.02c	grh1	Other	mRNA	1945	170	4	27.9895	37.8382	57.0567	85	0.430942
SPAC1D4.03c.1	SPAC1D4.03c	aut12	Other	mRNA	1845	95	6	17.4951	23.6512	34.3073	11	0.366888
SPAC1D4.04.1	SPAC1D4.04	cct2	Other	mRNA	1798	1904	196	181.434	245.276	44.4908	428	0.85954
SPAC1D4.05c.1	SPAC1D4.05c	erd101	Other	mRNA	3423	203	0	40.5397	54.8045	50.3289	126	0.352323
SPAC1D4.06c.1	SPAC1D4.06c	csk1	Reproduction	mRNA	921	244	167	36.9621	49.968	43.2258	38	0.331415
SPAC1D4.08.1	SPAC1D4.08	pis1	Other	mRNA	1113	638	297	193.982	262.238	53.4838	307	0.372158
SPAC1D4.09c.1	SPAC1D4.09c	rtf2	Reproduction	mRNA	944	591	49	99.0647	133.923	46.8597	342	0.477044
SPAC1D4.10.1	SPAC1D4.10	trz1	Other	mRNA	3172	135	2	39.841	53.86	47.9238	50	0.372595
SPAC1D4.11c.1	SPAC1D4.11c	lkh1	Other	mRNA	4306	84	0	19.2766	26.0595	45.7653	17	0.488843
SPAC1D4.12.1	SPAC1D4.12	rad15	Other	mRNA	3338	171	2	25.5897	34.594	50.7076	41	0.30264
SPAC1D4.13.1	SPAC1D4.13	byr1	Reproduction	mRNA	1928	120	6	8.89454	12.0243	47.3275	24	0.365579
SPAC1D4.14.1	SPAC1D4.14	tho2	Other	mRNA	5187	125	0	15.3628	20.7685	40.6468	41	0.467073
SPAC1F12.02c.1	SPAC1F12.02c	tma19	Translation	mRNA	755	39375	7582	2561.67	3463.06	37.4119	9349	0.492326
SPAC1F12.04c.1	SPAC1F12.04c	-	Other	mRNA	830	548	332	65.1704	88.102	42.2086	94	0.467496
SPAC1F12.05.1	SPAC1F12.05	any2	Other	mRNA	3231	139	0	41.6416	56.2941	45.04	20	0.464632
SPAC1F12.06c.1	SPAC1F12.06c	-	Other	mRNA	2659	240	2	9.26813	12.5293	51.6655	76	0.392954
SPAC1F12.07.1	SPAC1F12.07	ser1	Other	mRNA	1485	562	66	158.718	214.566	44.549	159	0.381159
SPAC1F12.08.1	SPAC1F12.08	cab4	Other	mRNA	1296	456	28	27.1623	36.72	48.6164	97	0.383117
SPAC1F12.09.1	SPAC1F12.09	gpi17	Other	mRNA	1771	109	13	26.9265	36.4011	56.1174	78	0.356663
SPAC1F12.10c.1	SPAC1F12.10c	-	Other	mRNA	796	785	53	73.0265	98.7225	53.3548	126	0.633174
SPAC1F3.01.1	SPAC1F3.01	rrp6	Other	mRNA	2439	401	60	80.1004	108.286	43.1267	121	0.426093
SPAC1F3.02c.1	SPAC1F3.02c	mkh1	Other	mRNA	3956	55	0	20.2489	27.3739	41.6555	11	0.338898
SPAC1F3.03.1	SPAC1F3.03	sro7	Other	mRNA	4750	138	0	15.3252	20.7177	48.2576	59	0.388666
SPAC1F3.04c.1	SPAC1F3.04c	tsr3	Other	mRNA	1078	806	103	48.1756	65.1273	44.1006	361	0.486985
SPAC1F3.05.1	SPAC1F3.05	gga21	Other	mRNA	2035	142	8	58.4521	79.0198	58.785	20	0.70584
SPAC1F3.06c.1	SPAC1F3.06c	spo15	Reproduction	mRNA	6229	278	0	38.5649	52.1348	44.6477	39	0.439009
SPAC1F3.07c.1	SPAC1F3.07c	rsc58	Other	mRNA	1518	217	51	89.626	121.163	46.32	33	0.57053
SPAC1F3.08c.1	SPAC1F3.08c	-	Other	mRNA	327	1	1	0.851568	1.15121	46.58	1	0
SPAC1F3.09.1	SPAC1F3.09	mug161	Other	mRNA	2971	596	0	65.9057	89.0961	49.5357	303	0.410987
SPAC1F3.10c.1	SPAC1F3.10c	oct1	Other	mRNA	4533	99	0	8.52855	11.5295	56.8618	17	0.221963
SPAC1F5.02.1	SPAC1F5.02	pdi1	Other	mRNA	1793	1611	434	382.802	517.5	43.3779	210	0.442214
SPAC1F5.03c.1	SPAC1F5.03c	-	Other	mRNA	1937	591	33	164.617	222.541	52.4174	202	0.358202
SPAC1F5.04c.1	SPAC1F5.04c	cdc12	Other	mRNA	5914	64	0	17.0292	23.0213	44.7068	41	0.446516
SPAC1F5.05c.1	SPAC1F5.05c	mso1	Other	mRNA	972	471	52	55.4586	74.9729	45.9335	369	0.398011
SPAC1F5.06.1	SPAC1F5.06	lsh1	Other	mRNA	4691	304	0	52.7176	71.2674	41.7283	42	0.519031
SPAC1F5.07c.1	SPAC1F5.07c	hem14	Other	mRNA	1851	309	18	39.9541	54.0129	40.3832	202	0.434252
SPAC1F5.08c.1	SPAC1F5.08c	yam8	Other	mRNA	1573	138	54	37.4116	50.5757	53.0742	105	0.475172
SPAC1F5.09c.1	SPAC1F5.09c	shk2	Reproduction	mRNA	1770	54	2	9.29521	12.5659	55.4544	18	0.50246
SPAC1F5.10.1	SPAC1F5.10	fal1	Other	mRNA	1599	1364	76	82.4736	111.494	47.4007	815	0.424292
SPAC1F5.11c.1	SPAC1F5.11c	tra2	Other	mRNA	11390	103	0	6.84137	9.24866	36.1096	55	0.431365
SPAC1F7.01c.1	SPAC1F7.01c	spt6	Other	mRNA	4413	182	0	38.8331	52.4974	46.4256	27	0.286096
SPAC1F7.02c.1	SPAC1F7.02c	has1	Other	mRNA	2183	1119	56	201.215	272.017	49.9161	142	0.407576
SPAC1F7.03.1	SPAC1F7.03	pkd2	Other	mRNA	3026	129	1	92.9667	125.679	49.2575	52	0.391942
SPAC1F7.04.1	SPAC1F7.04	rho1	Other	mRNA	1716	2122	72	464.51	627.959	48.6462	1043	0.362104
SPAC1F7.05.1	SPAC1F7.05	cdc22	Other	mRNA	2716	613	98	163.163	220.575	51.3945	376	0.335862
SPAC1F7.06.1	SPAC1F7.06	hsp3105	Other	mRNA	1943	4	0	0.979326	1.32392	47.6967	3	0.075775
SPAC1F7.07c.1	SPAC1F7.07c	fip1	Other	mRNA	1763	200	17	160.278	216.675	46.9915	60	0.373946
SPAC1F7.08.1	SPAC1F7.08	fio1	Other	mRNA	2795	89	1	37.0952	50.1479	46.4496	70	0.343558
SPAC1F7.09c.1	SPAC1F7.09c	dal2	Other	mRNA	1635	24	2	22.2969	30.1426	56.5667	3	0.251116
SPAC1F7.10.1	SPAC1F7.10	-	Other	mRNA	1403	143	3	9.75844	13.1922	48.0475	106	0.385737
SPAC1F7.11c.1	SPAC1F7.11c	-	Other	mRNA	3025	46	0	31.4134	42.4669	51.6662	16	0.402709
SPAC1F7.12.1	SPAC1F7.12	yak3	Other	mRNA	1455	404	31	54.1615	73.2194	47.4725	204	0.410762
SPAC1F7.13c.1	SPAC1F7.13c	rpl801	Translation	mRNA	874	21262	3249	2152.03	2909.27	41.5551	4935	0.474777
SPAC1F7.14c.1	SPAC1F7.14c	tam6	Other	mRNA	246	447	426	19.8093	26.7797	38.3561	62	0.506616
SPAC1F8.01.1	SPAC1F8.01	ght3	Other	mRNA	2041	15	1	2.10337	2.84348	49.6558	12	0.434162
SPAC1F8.02c.1	SPAC1F8.02c	shu1	Other	mRNA	759	4	2	0.0305734	0.0413314	46.48	2	0
SPAC1F8.03c.1	SPAC1F8.03c	str3	Other	mRNA	2100	85	3	10.7518	14.535	60.6359	32	0.269576
SPAC1F8.04c.1	SPAC1F8.04c	-	Other	mRNA	1545	8	1	0.720939	0.974618	48.1775	4	0.456039
SPAC1F8.05.1	SPAC1F8.05	isp3	Reproduction	mRNA	1006	400	17	17.0003	22.9822	42.432	141	0.440073
SPAC1F8.06.1	SPAC1F8.06	pfl8	Other	mRNA	1561	94	17	24.7067	33.4003	54.7589	71	0.348536
SPAC1F8.07c.1	SPAC1F8.07c	pdc101	Other	mRNA	1878	10002	2744	2215.47	2995.03	39.3277	1088	0.443425
SPAC1F8.08.1	SPAC1F8.08	-	Other	mRNA	1013	197	8	12.5762	17.0014	55.2934	121	0.519405
SPAC20G4.01.1	SPAC20G4.01	caf16	Other	mRNA	1072	780	286	93.8167	126.828	44.6937	585	0.491902
SPAC20G4.02c.1	SPAC20G4.02c	fus1	Reproduction	mRNA	4680	91	0	4.62617	6.25399	50.7008	61	0.421222
SPAC20G4.03c.1	SPAC20G4.03c	hri1	Translation	mRNA	2738	67	3	22.1713	29.9727	60.9129	17	0.330918
SPAC20G4.04c.1	SPAC20G4.04c	hus1	Reproduction	mRNA	1496	363	61	29.4719	39.8422	57.4006	226	0.423997
SPAC20G4.05c.1	SPAC20G4.05c	-	Other	mRNA	1999	90	8	18.0395	24.3871	0	0	0
SPAC20G4.06c.1	SPAC20G4.06c	adf1	Other	mRNA	629	15027	7799	697.153	942.462	36.7872	11618	0.52082
SPAC20G4.07c.1	SPAC20G4.07c	erg4	Other	mRNA	1541	300	106	115.861	156.629	40.66	24	0.617481
SPAC20G4.08.1	SPAC20G4.08	pdc1	Other	mRNA	3500	117	5	31.9238	43.1569	60.5676	46	0.478492
SPAC20G4.09.1	SPAC20G4.09	-	Other	mRNA	75	62	62	6.18806	8.36547	27.6219	48	0.473292
SPAC20G8.01.1	SPAC20G8.01	cdc17	Other	mRNA	2623	94	9	27.4783	37.1471	41.7078	41	0.453706
SPAC20G8.02.1	SPAC20G8.02	-	Other	mRNA	2445	107	5	28.5961	38.6582	34.5977	13	0.320133
SPAC20G8.03.1	SPAC20G8.03	itr2	Other	mRNA	2213	606	102	155.82	210.649	47.9038	437	0.381048
SPAC20G8.04c.1	SPAC20G8.04c	-	Other	mRNA	2503	177	18	65.7775	88.9228	47.0017	23	0.362247
SPAC20G8.05c.1	SPAC20G8.05c	cdc15	Other	mRNA	3461	82	2	58.6199	79.2466	51.3737	30	0.349855
SPAC20G8.06.1	SPAC20G8.06	not1	Translation	mRNA	6610	156	0	32.1433	43.4536	42.0191	66	0.428117
SPAC20G8.07c.1	SPAC20G8.07c	erg2	Other	mRNA	1151	1515	144	145.038	196.073	45.8567	198	0.354059
SPAC20G8.08c.1	SPAC20G8.08c	fft1	Other	mRNA	3376	201	7	27.6731	37.4105	50.4747	60	0.397501
SPAC20G8.09c.1	SPAC20G8.09c	nat10	Other	mRNA	3267	485	41	122.334	165.379	46.5022	97	0.533629
SPAC20G8.10c.1	SPAC20G8.10c	atg6	Other	mRNA	1598	138	37	18.6165	25.1671	55.3848	21	0.253602
SPAC20H4.01.1	SPAC20H4.01	utp5	Other	mRNA	2474	373	9	89.7538	121.336	48.2827	243	0.373944
SPAC20H4.02.1	SPAC20H4.02	dsc3	Other	mRNA	1120	829	70	61.4732	83.1039	44.0871	273	0.50404
SPAC20H4.03c.1	SPAC20H4.03c	tfs1	Other	mRNA	1179	740	191	129.607	175.212	55.5851	509	0.497308
SPAC20H4.04.1	SPAC20H4.04	fml2	Other	mRNA	3745	167	1	12.9441	17.4988	53.5994	80	0.530654
SPAC20H4.05c.1	SPAC20H4.05c	mde1	Other	mRNA	3276	992	0	8.64884	11.6921	40.5644	766	0.551919
SPAC20H4.06c.1	SPAC20H4.06c	gpl1	Other	mRNA	2036	205	8	19.0908	25.8083	44.2425	16	0.360591
SPAC20H4.07.1	SPAC20H4.07	rad57	Reproduction	mRNA	1922	455	16	29.7128	40.168	49.7344	278	0.441031
SPAC20H4.08.1	SPAC20H4.08	whi2	Other	mRNA	1295	1026	58	77.9839	105.424	47.0295	542	0.454077
SPAC20H4.09.1	SPAC20H4.09	-	Other	mRNA	1944	192	22	24.5302	33.1617	49.44	86	0.457462
SPAC20H4.10.1	SPAC20H4.10	ufd2	Other	mRNA	3153	132	9	39.2642	53.0801	49.1516	67	0.482358
SPAC20H4.11c.1	SPAC20H4.11c	rho5	Other	mRNA	1264	45	16	11.0886	14.9903	46.8767	27	0.493569
SPAC212.01c.1	SPAC212.01c	-	Other	mRNA	862	0	0	8.80291	11.9004	0	0	0
SPAC212.02.1	SPAC212.02	-	Other	mRNA	411	0	0	5.53312	7.48007	0	0	0
SPAC212.03.1	SPAC212.03	-	Other	mRNA	466	0	0	1.99187	2.69275	0	0	0
SPAC212.04c.1	SPAC212.04c	-	Other	mRNA	1615	136	4	29.7429	40.2086	53.816	91	0.354819
SPAC212.05c.1	SPAC212.05c	-	Other	pseudogenic_transcript	192	0	0	0	0	0	0	0
SPAC212.06c.1	SPAC212.06c	-	Other	mRNA	891	2	1	6.5631	8.87247	50.97	1	0
SPAC212.07c.1	SPAC212.07c	-	Other	pseudogenic_transcript	891	0	0	0	0	0	0	0
SPAC212.08c.1	SPAC212.08c	-	Other	mRNA	1211	1	0	0.0574861	0.0777139	54.3	1	0
SPAC212.09c.1	SPAC212.09c	-	Other	pseudogenic_transcript	1656	0	0	1.56944	2.12168	0	0	0
SPAC212.10.1	SPAC212.10	-	Other	pseudogenic_transcript	606	0	0	0.0382925	0.0517665	0	0	0
SPAC212.11.1	SPAC212.11	tlh1	Other	mRNA	5662	1	0	23.2995	31.4979	36.29	1	0
SPAC212.12.1	SPAC212.12	-	Other	mRNA	372	0	0	0	0	0	0	0
SPAC21E11.03c.1	SPAC21E11.03c	pcr1	Reproduction	mRNA	1481	59	27	54.3701	73.5015	40.8162	8	0.518809
SPAC21E11.04.1	SPAC21E11.04	aca1	Other	mRNA	1024	293	31	43.6684	59.0342	42.9272	47	0.474684
SPAC21E11.05c.1	SPAC21E11.05c	cyp8	Other	mRNA	2472	328	5	41.4728	56.0659	47.4801	87	0.432793
SPAC21E11.06.1	SPAC21E11.06	tif224	Translation	mRNA	2097	666	27	114.909	155.342	45.805	358	0.413047
SPAC21E11.07.1	SPAC21E11.07	iba57	Other	mRNA	1199	187	28	41.6881	56.357	45.7718	114	0.376509
SPAC21E11.08.1	SPAC21E11.08	lcb2	Other	mRNA	2432	384	24	125.482	169.636	47.7064	80	0.510357
SPAC222.03c.1	SPAC222.03c	tim10	Other	mRNA	577	3555	755	210.576	284.672	37.8639	2656	0.511848
SPAC222.04c.1	SPAC222.04c	ies6	Other	mRNA	694	1435	122	85.2642	115.266	43.2267	142	0.556862
SPAC222.05c.1	SPAC222.05c	mss1	Translation	mRNA	2036	381	45	37.9877	51.3546	49.2623	80	0.469493
SPAC222.06.1	SPAC222.06	mak16	Other	mRNA	1178	1289	85	207.252	280.178	44.3164	968	0.435103
SPAC222.07c.1	SPAC222.07c	hri2	Translation	mRNA	2229	127	14	18.7807	25.3891	59.7584	44	0.549095
SPAC222.08c.1	SPAC222.08c	sno1	Other	mRNA	1408	744	47	84.0201	113.584	50.6314	138	0.377353
SPAC222.09.1	SPAC222.09	seb1	Other	mRNA	2171	534	17	98.8708	133.661	72.3109	149	0.514531
SPAC222.10c.1	SPAC222.10c	byr4	Other	mRNA	2554	112	0	28.2751	38.2244	46.5527	11	0.166218
SPAC222.11.1	SPAC222.11	hem13	Other	mRNA	1428	854	131	164.549	222.449	50.1085	543	0.389273
SPAC222.12c.1	SPAC222.12c	atp2	Other	mRNA	1906	2944	513	773.857	1046.16	46.8702	261	0.491133
SPAC222.13c.1	SPAC222.13c	-	Other	mRNA	2469	137	1	38.8634	52.5383	55.8237	35	0.48338
SPAC222.14c.1	SPAC222.14c	sey1	Other	mRNA	2662	256	8	47.9011	64.7562	50.1691	88	0.324495
SPAC222.15.1	SPAC222.15	meu13	Reproduction	mRNA	651	43	10	1.46147	1.97572	61.8308	40	0.50113
SPAC222.16c.1	SPAC222.16c	csn3	Other	mRNA	1299	610	66	28.618	38.6879	42.576	445	0.599681
SPAC222.17.1	SPAC222.17	-	Other	mRNA	649	695	53	45.4808	61.4843	42.5022	306	0.493657
SPAC222.18.1	SPAC222.18	-	Other	mRNA	786	703	51	34.1288	46.1378	53.9798	477	0.46058
SPAC222.19.1	SPAC222.19	lam3	Other	mRNA	354	467	455	54.4733	73.641	39.5282	60	0.493483
SPAC227.01c.1	SPAC227.01c	erd1	Other	mRNA	1797	133	14	50.2845	67.9782	57.8743	7	0.396587
SPAC227.02c.1	SPAC227.02c	rrp15	Other	mRNA	694	673	559	99.5083	134.523	55.5293	56	0.512947
SPAC227.03c.1	SPAC227.03c	yea6	Other	mRNA	1748	158	16	28.2499	38.1902	52.5009	22	0.398691
SPAC227.04.1	SPAC227.04	atg10	Other	mRNA	941	262	48	16.7689	22.6694	47.6573	169	0.475249
SPAC227.05.1	SPAC227.05	pfd4	Other	mRNA	454	1357	1231	126.044	170.396	38.6615	708	0.543333
SPAC227.06.1	SPAC227.06	yip5	Other	mRNA	1086	520	94	121.09	163.699	54.1521	373	0.318456
SPAC227.07c.1	SPAC227.07c	pab1	Reproduction	mRNA	2275	462	16	110.457	149.324	58.3458	113	0.442071
SPAC227.08c.1	SPAC227.08c	yth1	Other	mRNA	869	408	47	27.9851	37.8323	54.2167	303	0.433492
SPAC227.09.1	SPAC227.09	fol3	Other	mRNA	1880	356	26	30.7963	41.6327	40.5714	238	0.40899
SPAC227.10.1	SPAC227.10	pfd2	Other	mRNA	932	1575	222	81.3677	109.999	43.5283	309	0.493091
SPAC227.11c.1	SPAC227.11c	yos9	Other	mRNA	3096	219	0	24.8992	33.6605	46.6602	126	0.349177
SPAC227.12.1	SPAC227.12	rna4	Other	mRNA	1782	296	28	31.1356	42.0914	50.2632	184	0.401169
SPAC227.13c.1	SPAC227.13c	isu1	Other	mRNA	1602	236	20	151.167	204.359	57.6491	22	0.261206
SPAC227.14.1	SPAC227.14	yfh7	Other	mRNA	2407	52	1	6.71959	9.08402	54.3597	36	0.328748
SPAC227.15.1	SPAC227.15	reg1	Other	mRNA	3316	55	4	26.9841	36.4791	44.1	37	0.409963
SPAC227.16c.1	SPAC227.16c	psf3	Other	mRNA	857	331	47	29.9204	40.4486	46.691	259	0.49133
SPAC227.17c.1	SPAC227.17c	-	Other	mRNA	1109	1355	136	75.1188	101.551	41.9441	216	0.489941
SPAC227.18.1	SPAC227.18	lys3	Other	mRNA	1721	1631	108	372.376	503.405	44.5819	1009	0.378458
SPAC227.19c.1	SPAC227.19c	-	Other	mRNA	252	283	161	30.4799	41.2049	56.3568	25	0.309081
SPAC22A12.01c.1	SPAC22A12.01c	pso2	Other	mRNA	3108	95	1	17.1277	23.1544	66.0609	35	0.477254
SPAC22A12.02c.1	SPAC22A12.02c	mug103	Other	mRNA	375	4	3	2.53711	3.42984	38.355	2	0.62221
SPAC22A12.03c.1	SPAC22A12.03c	csn4	Other	mRNA	1478	602	25	41.2764	55.8005	40.2624	54	0.31052
SPAC22A12.04c.1	SPAC22A12.04c	rps2201	Translation	mRNA	699	18231	909	1728.97	2337.35	35.5713	4150	0.515377
SPAC22A12.05.1	SPAC22A12.05	rpc11	Other	mRNA	466	1550	1385	118.665	160.42	42.185	561	0.395248
SPAC22A12.06c.1	SPAC22A12.06c	fsh2	Other	mRNA	1837	403	44	168.475	227.756	48.7645	71	0.360877
SPAC22A12.07c.1	SPAC22A12.07c	ogm1	Other	mRNA	3182	265	9	79.4243	107.372	41.0448	21	0.498207
SPAC22A12.08c.1	SPAC22A12.08c	crd1	Other	mRNA	1758	542	77	44.8793	60.6711	51.4395	373	0.614912
SPAC22A12.09c.1	SPAC22A12.09c	sap114	Other	mRNA	1907	150	8	37.7222	50.9956	57.8968	102	0.592104
SPAC22A12.10.1	SPAC22A12.10	ept1	Other	mRNA	4543	446	0	58.9095	79.6382	52.1691	159	0.373909
SPAC22A12.11.1	SPAC22A12.11	dak1	Other	mRNA	2195	302	18	83.1371	112.391	43.2449	106	0.341679
SPAC22A12.12c.1	SPAC22A12.12c	rrp40	Other	mRNA	1217	1050	66	73.2767	99.0607	42.5887	75	0.371505
SPAC22A12.13.1	SPAC22A12.13	mug84	Other	mRNA	974	254	20	31.6153	42.7399	43.4078	37	0.46173
SPAC22A12.14c.1	SPAC22A12.14c	-	Other	mRNA	1431	553	39	57.9239	78.3057	44.1189	360	0.457119
SPAC22A12.15c.1	SPAC22A12.15c	bip1	Other	mRNA	2805	1893	58	637.759	862.169	43.9399	182	0.497866
SPAC22A12.16.1	SPAC22A12.16	acl2	Other	mRNA	1665	1808	285	258.087	348.9	42.8569	1092	0.462075
SPAC22A12.17c.1	SPAC22A12.17c	-	Other	mRNA	3670	113	0	7.06274	9.54792	46.1518	17	0.526163
SPAC22E12.01.1	SPAC22E12.01	pet3	Other	mRNA	2015	66	1	44.0612	59.5651	55.3006	32	0.302973
SPAC22E12.02.1	SPAC22E12.02	-	Other	mRNA	1966	195	1	21.6826	29.3121	50.663	44	0.416577
SPAC22E12.03c.1	SPAC22E12.03c	sdj1	Other	mRNA	1023	245	99	48.9283	66.1449	48.3611	28	0.317731
SPAC22E12.04.1	SPAC22E12.04	ccs1	Other	mRNA	1094	850	321	105.93	143.203	48.7953	120	0.317198
SPAC22E12.05c.1	SPAC22E12.05c	rer1	Other	mRNA	1280	1264	228	164.92	222.951	51.8075	715	0.397758
SPAC22E12.06c.1	SPAC22E12.06c	gmh3	Other	mRNA	2827	146	0	40.8041	55.1619	51.7112	42	0.557675
SPAC22E12.07.1	SPAC22E12.07	rna1	Other	mRNA	2823	761	2	77.5234	104.802	47.4883	294	0.459842
SPAC22E12.08.1	SPAC22E12.08	rrn10	Other	mRNA	1162	356	17	37.1643	50.2414	47.2343	21	0.469073
SPAC22E12.09c.1	SPAC22E12.09c	krp1	Reproduction	mRNA	2435	183	12	64.9556	87.8117	52.9721	24	0.935324
SPAC22E12.10c.1	SPAC22E12.10c	etp1	Other	mRNA	2152	446	41	128.481	173.689	60.9071	45	0.399694
SPAC22E12.11c.1	SPAC22E12.11c	set3	Other	mRNA	3895	117	0	28.454	38.4661	47.0429	56	0.331505
SPAC22E12.13c.1	SPAC22E12.13c	rlp24	Translation	mRNA	1086	3299	603	426.989	577.235	44.6117	2417	0.378865
SPAC22E12.14c.1	SPAC22E12.14c	sck2	Reproduction	mRNA	3406	68	0	20.9569	28.3311	50.5164	28	0.318513
SPAC22E12.16c.1	SPAC22E12.16c	pik1	Other	mRNA	2980	163	3	59.3213	80.1948	53.3735	46	0.464502
SPAC22E12.17c.1	SPAC22E12.17c	glo3	Other	mRNA	2102	580	25	123.301	166.688	49.2922	272	0.344576
SPAC22E12.18.1	SPAC22E12.18	-	Other	mRNA	1134	1147	253	90.5905	122.467	46.1089	492	0.430504
SPAC22E12.19.1	SPAC22E12.19	snt1	Other	mRNA	2454	128	7	28.8694	39.0278	58.7953	111	0.201622
SPAC22F3.02.1	SPAC22F3.02	atf31	Reproduction	mRNA	2973	113	1	11.8875	16.0704	50.5347	30	0.371651
SPAC22F3.03c.1	SPAC22F3.03c	rdh54	Reproduction	mRNA	3718	166	0	7.09638	9.5934	56.7939	23	0.345672
SPAC22F3.04.1	SPAC22F3.04	mug62	Other	mRNA	4537	15	0	0.15344	0.207431	38.872	10	0.397571
SPAC22F3.05c.1	SPAC22F3.05c	alp41	Other	mRNA	5579	104	0	11.5049	15.5531	53.26	45	0.420972
SPAC22F3.06c.1	SPAC22F3.06c	lon1	Other	mRNA	3617	408	5	87.0662	117.702	41.3746	247	0.437982
SPAC22F3.07c.1	SPAC22F3.07c	atp20	Other	mRNA	508	2528	1508	286.411	387.191	41.1465	1278	0.51957
SPAC22F3.08c.1	SPAC22F3.08c	rok1	Other	mRNA	1778	626	46	87.3786	118.125	46.9728	299	0.371291
SPAC22F3.09c.1	SPAC22F3.09c	res2	Reproduction	mRNA	2473	122	5	19.1422	25.8778	56.6294	83	0.311666
SPAC22F3.10c.1	SPAC22F3.10c	gcs1	Other	mRNA	2107	509	165	110.222	149.006	45.2245	341	0.38061
SPAC22F3.11c.1	SPAC22F3.11c	snu23	Other	mRNA	775	318	166	28.2954	38.2518	46.9002	204	0.434552
SPAC22F3.12c.1	SPAC22F3.12c	rgs1	Reproduction	mRNA	2829	74	2	9.76933	13.2069	66.0309	57	0.51803
SPAC22F3.13.1	SPAC22F3.13	tsc1	Other	mRNA	4324	126	0	19.9423	26.9595	36.564	10	0.238767
SPAC22F3.15.1	SPAC22F3.15	aim41	Other	mRNA	372	374	353	41.732	56.4163	46.0712	120	0.465533
SPAC22F8.02c.1	SPAC22F8.02c	pvg5	Other	mRNA	1119	45	22	53.3783	72.1606	40.7767	6	0.297074
SPAC22F8.03c.1	SPAC22F8.03c	-	Other	mRNA	402	0	0	0.115449	0.156072	0	0	0
SPAC22F8.04.1	SPAC22F8.04	pet1	Other	mRNA	1815	483	72	277.875	375.651	48.1991	348	0.323999
SPAC22F8.05.1	SPAC22F8.05	-	Other	mRNA	3372	154	1	61.8118	83.5617	39.89	83	0.455297
SPAC22F8.06.1	SPAC22F8.06	pam1	Other	mRNA	1073	2239	214	128.332	173.488	44.8569	907	0.466695
SPAC22F8.07c.1	SPAC22F8.07c	rtf1	Reproduction	mRNA	1891	244	8	24.7637	33.4774	55.005	161	0.377049
SPAC22F8.08.1	SPAC22F8.08	sec24	Other	mRNA	3112	416	7	127.122	171.852	44.2708	216	0.420596
SPAC22F8.09.1	SPAC22F8.09	rrp16	Other	mRNA	1498	1375	87	171.669	232.075	45.9775	655	0.386308
SPAC22F8.10c.1	SPAC22F8.10c	sap145	Other	mRNA	1941	405	31	51.4556	69.5614	46.2491	46	0.352966
SPAC22F8.11.1	SPAC22F8.11	plc1	Other	mRNA	4062	218	0	17.6981	23.9256	45.1771	129	0.37432
SPAC22F8.12c.1	SPAC22F8.12c	shf1	Other	mRNA	3425	318	0	12.1209	16.3859	50.4927	74	0.416669
SPAC22G7.01c.1	SPAC22G7.01c	fra1	Other	mRNA	2179	355	32	80.8083	109.243	47.738	51	0.490866
SPAC22G7.02.1	SPAC22G7.02	kap111	Other	mRNA	3219	260	2	35.3233	47.7526	56.926	104	0.433005
SPAC22G7.03.1	SPAC22G7.03	-	Other	mRNA	827	185	62	10.859	14.68	45.8252	141	0.547831
SPAC22G7.04.1	SPAC22G7.04	pan2	Other	mRNA	3459	153	6	45.2499	61.172	53.1328	105	0.388968
SPAC22G7.05.1	SPAC22G7.05	kri1	Other	mRNA	1934	585	58	117.778	159.221	41.1505	417	0.389658
SPAC22G7.06c.1	SPAC22G7.06c	ura1	Other	mRNA	6951	238	0	105.827	143.065	45.1096	28	0.41206
SPAC22G7.07c.1	SPAC22G7.07c	ime4	Other	mRNA	2435	164	0	12.0743	16.323	56.3395	42	0.293629
SPAC22G7.08.1	SPAC22G7.08	ppk8	Other	mRNA	2207	140	13	15.1197	20.4399	47.7317	47	0.576294
SPAC22G7.09c.1	SPAC22G7.09c	nup45	Other	mRNA	1586	369	36	72.4249	97.9092	49.4099	157	0.515279
SPAC22G7.10.1	SPAC22G7.10	iss1	Other	mRNA	1961	443	19	83.8631	113.372	43.8302	46	0.423561
SPAC22G7.11c.1	SPAC22G7.11c	cum1	Other	mRNA	706	68	28	23.5668	31.8593	52.9593	14	0.348792
SPAC22H10.02.1	SPAC22H10.02	-	Other	mRNA	971	502	192	103.551	139.988	61.3088	169	0.271771
SPAC22H10.03c.1	SPAC22H10.03c	kap114	Other	mRNA	3261	343	24	50.5235	68.3013	53.2384	162	0.415823
SPAC22H10.04.1	SPAC22H10.04	ppa3	Other	mRNA	1840	267	3	34.4421	46.5613	48.9781	42	0.586093
SPAC22H10.05c.1	SPAC22H10.05c	-	Other	mRNA	2591	361	3	43.4191	58.6971	45.0472	192	0.50077
SPAC22H10.06c.1	SPAC22H10.06c	-	Other	mRNA	282	15	15	0.740593	1.00119	61.765	2	0.134747
SPAC22H10.07.1	SPAC22H10.07	scd2	Reproduction	mRNA	2631	97	3	35.0239	47.3479	50.2871	31	0.372367
SPAC22H10.08.1	SPAC22H10.08	-	Other	mRNA	1896	308	25	47.7935	64.6107	44.4731	209	0.430865
SPAC22H10.09.1	SPAC22H10.09	-	Other	mRNA	2322	371	40	40.1744	54.3107	53.4003	202	0.343196
SPAC22H10.10.1	SPAC22H10.10	alp21	Other	mRNA	1858	168	16	18.0596	24.4143	72.423	84	0.335475
SPAC22H10.11c.1	SPAC22H10.11c	crf1	Other	mRNA	2427	139	8	70.2085	94.9129	53.4867	24	0.455973
SPAC22H10.12c.1	SPAC22H10.12c	gdi1	Other	mRNA	1753	1092	92	110.917	149.945	44.3762	545	0.471408
SPAC22H10.13.1	SPAC22H10.13	zym1	Other	mRNA	511	214	102	29.1995	39.4741	43.8595	172	0.476102
SPAC22H12.01c.1	SPAC22H12.01c	mug35	Other	mRNA	1255	169	8	21.4856	29.0458	48.3396	27	0.347843
SPAC22H12.02.1	SPAC22H12.02	tfg3	Other	mRNA	2242	1791	10	86.3728	116.765	41.5578	1150	0.549955
SPAC22H12.03.1	SPAC22H12.03	-	Other	mRNA	1108	142	15	18.1788	24.5755	43.425	6	0.230415
SPAC22H12.04c.1	SPAC22H12.04c	rps102	Translation	mRNA	950	49981	5058	3623.75	4898.85	35.3814	11962	0.519648
SPAC22H12.05c.1	SPAC22H12.05c	fsc1	Other	mRNA	2798	75	2	17.4164	23.5447	50.6122	9	0.239449
SPAC23A1.02c.1	SPAC23A1.02c	ted1	Other	mRNA	2011	7	1	17.251	23.3212	54.32	4	0.248082
SPAC23A1.03.1	SPAC23A1.03	apt1	Other	mRNA	795	4800	1772	516.937	698.832	44.8726	3740	0.425416
SPAC23A1.04c.1	SPAC23A1.04c	mnl1	Other	mRNA	3225	49	0	21.7805	29.4445	75.6713	8	0.539093
SPAC23A1.05.1	SPAC23A1.05	-	Other	mRNA	1090	428	28	114.621	154.953	54.0481	259	0.411353
SPAC23A1.06c.1	SPAC23A1.06c	cmk2	Other	mRNA	1940	126	15	55.8241	75.4671	63.9556	78	0.348823
SPAC23A1.07.1	SPAC23A1.07	-	Other	mRNA	1013	376	138	29.1154	39.3602	46.7671	271	0.350545
SPAC23A1.08c.1	SPAC23A1.08c	rpl3401	Translation	mRNA	489	25590	6419	3185.19	4305.97	39.1129	4007	0.479542
SPAC23A1.09.1	SPAC23A1.09	rbm8	Other	mRNA	1228	911	51	73.1872	98.9397	44.3857	642	0.490257
SPAC23A1.10.1	SPAC23A1.10	tef102	Translation	mRNA	1451	4915	2404	4798.3	6486.69	40.0928	3314	0.453596
SPAC23A1.11.1	SPAC23A1.11	rpl1602	Translation	mRNA	801	6818	560	1441.1	1948.18	42.873	3088	0.451715
SPAC23A1.12c.1	SPAC23A1.12c	frs1	Translation	mRNA	1988	665	45	159.332	215.396	50.5015	232	0.45528
SPAC23A1.14c.1	SPAC23A1.14c	-	Other	mRNA	1934	607	4	43.8188	59.2374	44.4666	82	0.398408
SPAC23A1.15c.1	SPAC23A1.15c	sec20	Other	mRNA	1024	401	78	62.4547	84.4308	47.146	48	0.385689
SPAC23A1.16c.1	SPAC23A1.16c	rtr1	Other	mRNA	1089	62	23	15.9816	21.605	39.988	15	0.307389
SPAC23A1.17.1	SPAC23A1.17	bbc1	Other	mRNA	5343	147	0	45.5245	61.5433	46.9361	38	0.271345
SPAC23A1.18c.1	SPAC23A1.18c	mrp51	Translation	mRNA	1758	302	21	78.618	106.281	62.2079	42	0.458496
SPAC23A1.19c.1	SPAC23A1.19c	hrq1	Other	mRNA	3414	146	2	25.5027	34.4763	62.895	30	0.45145
SPAC23A1.20.1	SPAC23A1.20	new11	Other	mRNA	519	516	494	40.8663	55.246	43.6168	69	0.411153
SPAC23C11.01.1	SPAC23C11.01	ice2	Other	mRNA	2551	270	3	43.1539	58.3386	59.8827	118	0.402785
SPAC23C11.02c.1	SPAC23C11.02c	rps23	Translation	mRNA	514	16542	6519	2514.02	3398.64	38.5269	3022	0.477793
SPAC23C11.03.1	SPAC23C11.03	mpp10	Other	mRNA	2078	422	56	102.693	138.827	41.8332	93	0.40298
SPAC23C11.04c.1	SPAC23C11.04c	pnk1	Other	mRNA	3342	75	0	11.2554	15.2159	52.1043	23	0.483419
SPAC23C11.05.1	SPAC23C11.05	ipp1	Other	mRNA	1320	7586	436	878.723	1187.92	37.7279	4996	0.459469
SPAC23C11.06c.1	SPAC23C11.06c	-	Other	mRNA	1967	44	3	15.9617	21.5782	52.3422	9	0.303892
SPAC23C11.07.1	SPAC23C11.07	-	Other	mRNA	333	4	1	1.74213	2.35514	33.825	2	0.251904
SPAC23C11.08.1	SPAC23C11.08	php3	Other	mRNA	351	347	318	99.0355	133.883	53.453	179	0.432745
SPAC23C11.09.1	SPAC23C11.09	ala1	Translation	mRNA	3091	405	22	143.473	193.957	45.4804	101	0.583603
SPAC23C11.10.1	SPAC23C11.10	mpn1	Other	mRNA	798	104	30	11.9225	16.1177	47.7827	75	0.438295
SPAC23C11.11.1	SPAC23C11.11	cka1	Other	mRNA	1810	350	22	201.539	272.456	57.783	201	0.275575
SPAC23C11.12.1	SPAC23C11.12	hcn1	Other	mRNA	243	273	272	44.1186	59.6427	53.1013	47	0.644725
SPAC23C11.13c.1	SPAC23C11.13c	hpt1	Other	mRNA	1047	1982	125	301.535	407.637	47.0626	1386	0.411297
SPAC23C11.14.1	SPAC23C11.14	zhf1	Other	mRNA	1428	883	406	297.947	402.786	46.6025	566	0.495921
SPAC23C11.15.1	SPAC23C11.15	pst2	Other	mRNA	3601	128	5	34.5018	46.642	46.5159	46	0.594109
SPAC23C11.16.1	SPAC23C11.16	plo1	Reproduction	mRNA	2604	57	0	23.6241	31.9367	54.7026	35	0.234178
SPAC23C11.17.1	SPAC23C11.17	mdm28	Translation	mRNA	1762	346	133	118.002	159.523	50.1014	173	0.413854
SPAC23C4.02.1	SPAC23C4.02	crn1	Other	mRNA	1903	36	12	30.546	41.2943	50.986	20	0.342683
SPAC23C4.03.1	SPAC23C4.03	hrk1	Reproduction	mRNA	1697	578	152	114.467	154.745	50.1708	448	0.36132
SPAC23C4.04c.1	SPAC23C4.04c	-	Other	mRNA	423	369	45	19.9137	26.9208	37.083	290	0.593634
SPAC23C4.05c.1	SPAC23C4.05c	les1	Other	mRNA	1575	291	44	130.229	176.053	47.1231	169	0.381481
SPAC23C4.06c.1	SPAC23C4.06c	efm6	Translation	mRNA	3513	710	0	19.5854	26.477	45.2861	93	0.396317
SPAC23C4.07.1	SPAC23C4.07	tht2	Reproduction	mRNA	2817	216	0	3.69043	4.98899	67.5967	135	0.651504
SPAC23C4.08.1	SPAC23C4.08	rho3	Other	mRNA	1272	983	140	144.066	194.759	52.0227	170	0.351695
SPAC23C4.09c.1	SPAC23C4.09c	-	Other	mRNA	1802	2197	4	53.7635	72.6814	36.8699	1743	0.551163
SPAC23C4.10.1	SPAC23C4.10	sec2	Other	mRNA	1945	132	2	36.0546	48.7412	54.1495	76	0.317312
SPAC23C4.11.1	SPAC23C4.11	atp18	Other	mRNA	584	3233	155	24.596	33.2506	43.1821	2394	0.557326
SPAC23C4.12.1	SPAC23C4.12	hhp2	Reproduction	mRNA	1928	291	30	52.0674	70.3884	58.5747	189	0.527084
SPAC23C4.13.1	SPAC23C4.13	bet1	Other	mRNA	968	370	121	71.5335	96.7041	62.1832	234	0.384728
SPAC23C4.14.1	SPAC23C4.14	alg1	Other	mRNA	1384	148	77	50.6189	68.4303	47.1973	97	0.419218
SPAC23C4.15.1	SPAC23C4.15	rpb5	Other	mRNA	967	1888	430	183.17	247.623	48.5866	1445	0.459994
SPAC23C4.16c.1	SPAC23C4.16c	atg15	Other	mRNA	1730	355	28	34.8615	47.1283	42.431	31	0.337611
SPAC23C4.17.1	SPAC23C4.17	trm402	Other	mRNA	3173	370	4	43.0683	58.2228	46.7078	76	0.430736
SPAC23C4.18c.1	SPAC23C4.18c	rad4	Other	mRNA	4538	105	0	13.1418	17.766	52.6695	39	0.329265
SPAC23C4.19.1	SPAC23C4.19	spt5	Other	mRNA	3226	192	4	56.1788	75.9466	45.3951	51	0.438759
SPAC23D3.01.1	SPAC23D3.01	pdp3	Other	mRNA	1375	378	166	36.3183	49.0977	48.1816	197	0.388118
SPAC23D3.02.1	SPAC23D3.02	rfc2	Other	mRNA	1220	574	143	51.1847	69.1951	48.1122	415	0.389222
SPAC23D3.03c.1	SPAC23D3.03c	-	Other	mRNA	2068	356	23	93.2025	125.998	53.5266	29	0.525237
SPAC23D3.04c.1	SPAC23D3.04c	gpd2	Other	mRNA	1810	381	60	145.078	196.126	44.2609	57	0.313038
SPAC23D3.05c.1	SPAC23D3.05c	-	Other	pseudogenic_transcript	1599	44	2	6.53055	8.82847	43.4658	12	0.378297
SPAC23D3.06c.1	SPAC23D3.06c	nup146	Other	mRNA	4449	129	0	28.6558	38.739	30.5829	17	0.614478
SPAC23D3.07.1	SPAC23D3.07	pup1	Other	mRNA	1454	1356	98	129.416	174.954	48.6322	629	0.524994
SPAC23D3.08.1	SPAC23D3.08	usp108	Other	mRNA	2771	392	1	35.5239	48.0237	50.5368	135	0.396535
SPAC23D3.09.1	SPAC23D3.09	arp42	Other	mRNA	2925	486	2	29.1632	39.425	43.1628	240	0.389141
SPAC23D3.10c.1	SPAC23D3.10c	eng2	Reproduction	mRNA	2833	99	2	25.1301	33.9727	41.5419	16	0.454434
SPAC23D3.11.1	SPAC23D3.11	ayr1	Other	mRNA	2972	85	0	3.44331	4.65491	56.8033	46	0.459051
SPAC23D3.12.1	SPAC23D3.12	-	Other	mRNA	2633	254	3	143.885	194.514	60.4321	150	0.477529
SPAC23D3.13c.1	SPAC23D3.13c	-	Other	mRNA	4973	124	0	24.6844	33.3702	46.7171	21	0.450695
SPAC23D3.14c.1	SPAC23D3.14c	aah2	Other	mRNA	1746	88	4	14.686	19.8536	56.8364	14	0.193799
SPAC23D3.16.1	SPAC23D3.16	lam4	Other	mRNA	692	586	28	34.7408	46.9651	50.301	440	0.420599
SPAC23D3.17.1	SPAC23D3.17	-	Other	mRNA	1049	335	3	10.6625	14.4143	37.4118	118	0.543005
SPAC23E2.01.1	SPAC23E2.01	fep1	Other	mRNA	3521	103	1	37.823	51.1319	46.8004	28	0.353917
SPAC23E2.02.1	SPAC23E2.02	lsd2	Reproduction	mRNA	4018	88	1	19.6707	26.5923	45.1453	59	0.589216
SPAC23E2.03c.1	SPAC23E2.03c	ste7	Reproduction	mRNA	2744	9	0	4.9049	6.63079	68.3475	8	0.168424
SPAC23G3.01.1	SPAC23G3.01	rpb2	Other	mRNA	3757	327	8	80.3196	108.582	41.5793	59	0.545373
SPAC23G3.02c.1	SPAC23G3.02c	sib1	Other	mRNA	15022	124	0	4.71767	6.37768	50.125	16	0.42201
SPAC23G3.03.1	SPAC23G3.03	sib2	Other	mRNA	1962	138	11	53.3058	72.0626	42.8898	60	0.285387
SPAC23G3.04.1	SPAC23G3.04	ies4	Other	mRNA	1366	227	15	35.6742	48.227	58.6455	161	0.394213
SPAC23G3.05c.1	SPAC23G3.05c	-	Other	mRNA	1604	170	6	50.3455	68.0607	53.3921	29	0.623368
SPAC23G3.06.1	SPAC23G3.06	nop58	Other	mRNA	1960	3078	248	509.805	689.191	44.7115	1274	0.442808
SPAC23G3.07c.1	SPAC23G3.07c	snf30	Other	mRNA	1249	314	30	34.2969	46.3651	48.7376	140	0.387629
SPAC23G3.08c.1	SPAC23G3.08c	ubp7	Other	mRNA	3572	104	1	42.9609	58.0776	42.7233	9	0.429741
SPAC23G3.09.1	SPAC23G3.09	taf4	Other	mRNA	1625	515	25	81.3397	109.961	52.1159	185	0.298174
SPAC23G3.10c.1	SPAC23G3.10c	ssr3	Other	mRNA	3019	647	0	38.163	51.5915	41.6376	82	0.428707
SPAC23G3.11.1	SPAC23G3.11	rpn6	Other	mRNA	3046	1713	5	74.6133	100.868	40.4349	1112	0.465409
SPAC23G3.12c.1	SPAC23G3.12c	htr12	Other	mRNA	3154	376	3	54.9083	74.229	48.3224	46	0.431777
SPAC23H3.02c.1	SPAC23H3.02c	ini1	Other	mRNA	836	1732	90	89.1847	120.566	48.5403	1303	0.489747
SPAC23H3.03c.1	SPAC23H3.03c	npr2	Other	mRNA	1853	295	14	20.4251	27.6121	50.333	77	0.449515
SPAC23H3.04.1	SPAC23H3.04	-	Other	mRNA	1062	69	22	15.9509	21.5635	58.6889	56	0.43724
SPAC23H3.05c.1	SPAC23H3.05c	swd1	Other	mRNA	1598	311	22	46.788	63.2514	47.2686	29	0.443186
SPAC23H3.06.1	SPAC23H3.06	apl6	Other	mRNA	3197	132	1	34.8986	47.1784	31.3467	33	0.70291
SPAC23H3.07c.1	SPAC23H3.07c	mrp2	Translation	mRNA	1082	1845	118	51.3432	69.4094	39.5444	271	0.457198
SPAC23H3.08c.1	SPAC23H3.08c	bub3	Other	mRNA	1464	307	15	20.8277	28.1563	47.5545	130	0.433181
SPAC23H3.09c.1	SPAC23H3.09c	gly1	Other	mRNA	1924	943	65	313.693	424.073	46.3257	134	0.402784
SPAC23H3.10.1	SPAC23H3.10	ssr2	Other	mRNA	1799	405	85	80.1671	108.376	49.5011	268	0.371007
SPAC23H3.11c.1	SPAC23H3.11c	-	Other	mRNA	2037	31	8	16.9397	22.9003	44.23	1	0
SPAC23H3.12c.1	SPAC23H3.12c	-	Other	mRNA	935	92	7	18.2416	24.6602	39.2263	8	0.386017
SPAC23H3.13c.1	SPAC23H3.13c	gpa2	Reproduction	mRNA	2778	136	6	40.605	54.8928	52.2438	34	0.328831
SPAC23H3.14.1	SPAC23H3.14	avl9	Other	mRNA	1760	271	55	40.5037	54.7558	45.3279	72	0.402083
SPAC23H3.15c.1	SPAC23H3.15c	ddr48	Other	mRNA	1363	192	18	47.1766	63.7767	27.9226	19	0.34594
SPAC23H4.01c.1	SPAC23H4.01c	osh3	Other	mRNA	3389	149	2	56.9757	77.0239	37.3009	103	0.564211
SPAC23H4.02.1	SPAC23H4.02	ppk9	Other	mRNA	2006	59	1	47.6367	64.3987	68.0325	24	0.253011
SPAC23H4.03c.1	SPAC23H4.03c	erv25	Other	mRNA	1078	2659	248	191.088	258.327	39.7713	1515	0.494047
SPAC23H4.04.1	SPAC23H4.04	slm3	Other	mRNA	1463	510	118	42.5244	57.4876	74.0289	287	0.449489
SPAC23H4.05c.1	SPAC23H4.05c	-	Other	mRNA	1041	16	2	2.36288	3.19431	98.79	15	0.352326
SPAC23H4.06.1	SPAC23H4.06	gln1	Other	mRNA	2077	439	7	197.239	266.642	48.7622	88	0.318019
SPAC23H4.07c.1	SPAC23H4.07c	srp102	Other	mRNA	834	1679	228	101.502	137.218	39.2595	749	0.637577
SPAC23H4.08.1	SPAC23H4.08	iwr1	Other	mRNA	1129	217	18	29.1658	39.4285	56.6178	136	0.411524
SPAC23H4.09.1	SPAC23H4.09	cdb4	Other	mRNA	1322	4810	474	482.22	651.899	37.3328	575	0.4525
SPAC23H4.10c.1	SPAC23H4.10c	thi4	Other	mRNA	3506	256	0	19.373	26.1898	51.6843	23	0.466621
SPAC23H4.11c.1	SPAC23H4.11c	cnl2	Other	mRNA	1038	528	34	29.1966	39.47	55.2156	393	0.428872
SPAC23H4.12.1	SPAC23H4.12	alp13	Other	mRNA	1681	386	33	82.1225	111.019	46.3768	73	0.354052
SPAC23H4.13c.1	SPAC23H4.13c	-	Other	mRNA	1483	611	14	30.4657	41.1857	48.8589	122	0.514096
SPAC23H4.14.1	SPAC23H4.14	vam6	Other	mRNA	3025	79	1	22.5148	30.4372	47.9628	29	0.382642
SPAC23H4.15.1	SPAC23H4.15	tsr1	Other	mRNA	2656	556	67	116.367	157.313	46.9223	31	0.463473
SPAC23H4.16c.1	SPAC23H4.16c	not11	Other	mRNA	1057	568	135	77.7826	105.152	56.9103	190	0.474546
SPAC23H4.17c.1	SPAC23H4.17c	srb10	Other	mRNA	1252	54	26	28.0428	37.9102	62.313	10	0.433801
SPAC23H4.18c.1	SPAC23H4.18c	rbx1	Other	mRNA	723	1472	129	66.9839	90.5536	43.6812	901	0.518234
SPAC23H4.21.1	SPAC23H4.21	-	Other	mRNA	701	310	27	9.99712	13.5148	43.0113	142	0.509941
SPAC24B11.05.1	SPAC24B11.05	-	Other	mRNA	1696	74	5	19.2374	26.0065	50.7919	54	0.365045
SPAC24B11.06c.1	SPAC24B11.06c	sty1	Translation	mRNA	1569	1060	299	221.537	299.489	45.3234	88	0.358286
SPAC24B11.07c.1	SPAC24B11.07c	-	Other	mRNA	2437	29	1	38.0406	51.426	49.62	5	0.351197
SPAC24B11.08c.1	SPAC24B11.08c	erv46	Other	mRNA	1878	171	37	73.7057	99.6406	46.4666	41	0.439552
SPAC24B11.09.1	SPAC24B11.09	mpc2	Other	mRNA	2870	55	0	21.4507	28.9986	60.57	12	0.217327
SPAC24B11.10c.1	SPAC24B11.10c	cfh1	Other	mRNA	3303	41	0	31.3829	42.4257	44.54	4	0.380005
SPAC24B11.11c.1	SPAC24B11.11c	sid2	Other	mRNA	2298	328	36	56.5994	76.5151	51.6145	33	0.330082
SPAC24B11.12c.1	SPAC24B11.12c	dnf2	Other	mRNA	5149	107	0	40.9077	55.302	31.0422	9	0.412183
SPAC24B11.13.1	SPAC24B11.13	hem3	Other	mRNA	2178	350	4	99.8955	135.046	46.6525	255	0.335065
SPAC24B11.14.1	SPAC24B11.14	-	Other	mRNA	501	525	185	2.36221	3.19341	45.9526	401	0.509586
SPAC24C9.02c.1	SPAC24C9.02c	cyt2	Other	mRNA	798	954	219	98.2588	132.833	39.2812	114	0.437316
SPAC24C9.03.1	SPAC24C9.03	mvd1	Other	mRNA	2233	544	10	86.6481	117.137	45.5715	295	0.531003
SPAC24C9.04.1	SPAC24C9.04	-	Other	mRNA	1188	1302	69	66.5881	90.0186	42.8494	713	0.411589
SPAC24C9.05c.1	SPAC24C9.05c	mug70	Other	mRNA	2327	182	16	41.7834	56.4858	44.8829	17	0.577695
SPAC24C9.06c.1	SPAC24C9.06c	aco1	Other	mRNA	2849	598	15	222.726	301.097	45.2336	132	0.529216
SPAC24C9.07c.1	SPAC24C9.07c	bgs2	Reproduction	mRNA	6069	60	0	9.07715	12.2711	55.45	12	0.431913
SPAC24C9.08.1	SPAC24C9.08	cps1	Other	mRNA	2258	237	22	83.212	112.492	43.7931	124	0.406399
SPAC24C9.09.1	SPAC24C9.09	-	Translation	mRNA	2733	253	1	23.443	31.6919	49.9979	84	0.561945
SPAC24C9.10c.1	SPAC24C9.10c	mrp4	Translation	mRNA	978	564	164	94.1971	127.342	60.5185	53	0.823244
SPAC24C9.11.1	SPAC24C9.11	sgd1	Other	mRNA	2556	370	48	51.4764	69.5895	55.4486	174	0.417981
SPAC24C9.12c.1	SPAC24C9.12c	shm1	Other	mRNA	1871	2794	196	723.182	977.65	52.4869	211	0.362347
SPAC24C9.13c.1	SPAC24C9.13c	mrp10	Translation	mRNA	488	611	553	77.6044	104.911	44.9868	76	0.42794
SPAC24C9.14.1	SPAC24C9.14	otu1	Other	mRNA	1321	91	42	32.9897	44.5979	47.7553	17	0.277554
SPAC24C9.15c.1	SPAC24C9.15c	spn5	Reproduction	mRNA	1595	215	5	17.6331	23.8377	39.8076	86	0.427725
SPAC24C9.16c.1	SPAC24C9.16c	cox8	Other	mRNA	325	187	51	96.3196	130.212	43.6914	97	0.428662
SPAC24H6.01c.1	SPAC24H6.01c	gup1	Other	mRNA	2067	180	6	30.233	40.8712	53.9938	145	0.473773
SPAC24H6.02c.1	SPAC24H6.02c	tim15	Other	mRNA	1100	389	16	25.0828	33.9087	52.265	294	0.5403
SPAC24H6.03.1	SPAC24H6.03	cul3	Other	mRNA	2791	119	3	26.6224	35.9901	45.6331	45	0.448741
SPAC24H6.04.1	SPAC24H6.04	hxk1	Other	mRNA	2802	682	12	153.625	207.681	42.9807	82	0.371953
SPAC24H6.05.1	SPAC24H6.05	cdc25	Reproduction	mRNA	3229	77	0	27.9052	37.7243	39.8617	24	0.365355
SPAC24H6.06.1	SPAC24H6.06	sld3	Other	mRNA	2282	82	11	24.9238	33.6937	43.7218	17	0.385308
SPAC24H6.07.1	SPAC24H6.07	rps901	Translation	mRNA	730	14215	2800	2045.94	2765.85	43.0445	7447	0.432031
SPAC24H6.08.1	SPAC24H6.08	-	Other	mRNA	1250	118	14	31.2992	42.3125	49.0822	27	0.436759
SPAC24H6.09.1	SPAC24H6.09	gef1	Other	mRNA	2958	127	2	70.4237	95.2039	56.0135	34	0.231421
SPAC24H6.10c.1	SPAC24H6.10c	-	Other	mRNA	1227	4820	1425	319.635	432.105	37.1459	3371	0.515775
SPAC24H6.11c.1	SPAC24H6.11c	-	Other	mRNA	4462	110	0	12.8404	17.3585	41.0387	60	0.441514
SPAC24H6.12c.1	SPAC24H6.12c	uba3	Other	mRNA	1914	220	13	23.472	31.7311	45.7441	147	0.483691
SPAC24H6.13.1	SPAC24H6.13	-	Other	mRNA	3881	101	0	69.9745	94.5965	82.4622	9	0.929722
SPAC25A8.01c.1	SPAC25A8.01c	fft3	Other	mRNA	3682	270	0	80.6322	109.004	47.621	20	0.358139
SPAC25A8.02.1	SPAC25A8.02	atg14	Other	mRNA	1914	53	3	22.89	30.9444	52.4567	30	0.219413
SPAC25A8.03c.1	SPAC25A8.03c	-	Other	mRNA	1922	226	4	14.7176	19.8963	59.4323	136	0.305257
SPAC25B8.01.1	SPAC25B8.01	dap1	Other	mRNA	856	964	183	66.6879	90.1536	51.1125	604	0.661227
SPAC25B8.02.1	SPAC25B8.02	sds3	Other	mRNA	1255	291	21	46.9467	63.4659	44.6673	200	0.444396
SPAC25B8.03.1	SPAC25B8.03	psd2	Other	mRNA	2797	193	1	75.3071	101.806	46.4028	110	0.377655
SPAC25B8.04c.1	SPAC25B8.04c	mss51	Translation	mRNA	1731	114	7	37.7638	51.0518	47.2865	17	0.633175
SPAC25B8.05.1	SPAC25B8.05	deg1	Other	mRNA	1931	233	16	32.4465	43.8635	57.4424	21	0.606228
SPAC25B8.06c.1	SPAC25B8.06c	dia4	Translation	mRNA	3517	319	0	16.3037	22.0405	49.5478	79	0.476665
SPAC25B8.07c.1	SPAC25B8.07c	rcf1	Other	mRNA	1729	242	10	39.1899	52.9797	43.595	28	0.361481
SPAC25B8.08.1	SPAC25B8.08	-	Other	mRNA	1978	181	33	26.2437	35.4782	54.0611	122	0.288914
SPAC25B8.09.1	SPAC25B8.09	-	Other	mRNA	1108	299	101	37.5933	50.8214	47.4843	187	0.394428
SPAC25B8.10.1	SPAC25B8.10	-	Other	mRNA	1425	203	19	44.6843	60.4075	51.9223	122	0.356331
SPAC25B8.11.1	SPAC25B8.11	-	Other	mRNA	2659	211	17	74.5814	100.825	53.4708	122	0.426139
SPAC25B8.12c.1	SPAC25B8.12c	-	Other	mRNA	1884	436	4	324.085	438.122	48.8155	104	0.423033
SPAC25B8.13c.1	SPAC25B8.13c	isp7	Other	mRNA	3114	35	1	10.5295	14.2346	57.1	9	0.244822
SPAC25B8.14.1	SPAC25B8.14	mal2	Other	mRNA	2304	295	1	21.3218	28.8244	40.8497	76	0.415035
SPAC25B8.15c.1	SPAC25B8.15c	tyw3	Other	mRNA	2165	480	0	28.7466	38.8618	40.0006	53	0.399885
SPAC25B8.16.1	SPAC25B8.16	pop100	Other	mRNA	2535	147	13	24.441	33.0411	39.7458	24	0.442465
SPAC25B8.17.1	SPAC25B8.17	ypf1	Other	mRNA	1194	977	281	79.0611	106.88	42.8676	413	0.425867
SPAC25B8.18.1	SPAC25B8.18	-	Other	mRNA	748	418	107	34.2805	46.3428	45.6821	283	0.395168
SPAC25B8.19c.1	SPAC25B8.19c	loz1	Other	mRNA	3159	51	0	22.8967	30.9534	50.4213	8	0.340712
SPAC25B8.20.1	SPAC25B8.20	smp1	Other	mRNA	939	267	50	15.569	21.0473	49.4376	37	0.443502
SPAC25G10.01.1	SPAC25G10.01	-	Other	mRNA	2195	139	2	41.8329	56.5527	52.13	33	0.397524
SPAC25G10.02.1	SPAC25G10.02	cce1	Other	mRNA	1670	114	1	6.05837	8.19015	44.501	71	0.384404
SPAC25G10.03.1	SPAC25G10.03	zip1	Other	mRNA	1583	628	46	247.195	334.176	57.2763	452	0.359288
SPAC25G10.04c.1	SPAC25G10.04c	rec10	Reproduction	mRNA	2519	49	4	12.5284	16.9368	59.8129	17	0.280662
SPAC25G10.05c.1	SPAC25G10.05c	his1	Other	mRNA	1297	2127	587	435.639	588.929	47.0876	1342	0.422289
SPAC25G10.06.1	SPAC25G10.06	rps2801	Translation	mRNA	302	42496	36426	1447.56	1956.92	31.3857	28647	0.533444
SPAC25G10.07c.1	SPAC25G10.07c	cut7	Other	mRNA	3830	85	1	20.188	27.2915	41.3891	11	0.510922
SPAC25G10.08.1	SPAC25G10.08	tif302	Translation	mRNA	2527	2941	133	419.329	566.879	41.2612	1765	0.490043
SPAC25G10.09c.1	SPAC25G10.09c	pan1	Other	mRNA	5591	56	3	34.4073	46.5143	45.9746	13	0.551791
SPAC25H1.02.1	SPAC25H1.02	jmj1	Other	mRNA	1733	56	5	14.8497	20.075	47.56	39	0.443007
SPAC25H1.03.1	SPAC25H1.03	atg101	Other	mRNA	563	32	23	9.1502	12.3699	48.975	10	0.287488
SPAC25H1.04.1	SPAC25H1.04	mug105	Other	mRNA	817	725	468	39.7926	53.7945	36.4694	433	0.507293
SPAC25H1.05.1	SPAC25H1.05	meu29	Other	mRNA	1106	722	172	89.7997	121.398	45.4575	505	0.396318
SPAC25H1.06.1	SPAC25H1.06	pcf3	Other	mRNA	1653	677	62	82.3624	111.343	46.7826	204	0.361438
SPAC25H1.07.1	SPAC25H1.07	emc1	Other	mRNA	2947	226	7	90.8996	122.885	45.7011	122	0.569799
SPAC25H1.08c.1	SPAC25H1.08c	sqt1	Other	mRNA	1325	615	191	126.849	171.484	48.7187	55	0.421078
SPAC25H1.09.1	SPAC25H1.09	mde5	Other	mRNA	1980	6	0	0.410194	0.554529	43.705	2	0.298504
SPAC25H1.10c.1	SPAC25H1.10c	atp19	Other	mRNA	419	3051	569	157.674	213.155	44.9479	2357	0.472724
SPAC26A3.01.1	SPAC26A3.01	sxa1	Other	mRNA	2174	503	22	216.105	292.147	51.7695	341	0.315491
SPAC26A3.02.1	SPAC26A3.02	myh1	Other	mRNA	2749	118	0	26.9785	36.4715	59.4274	19	0.419036
SPAC26A3.03c.1	SPAC26A3.03c	rmi1	Reproduction	mRNA	3261	202	0	9.19386	12.4289	48.8771	34	0.563957
SPAC26A3.04.1	SPAC26A3.04	rpl2002	Translation	mRNA	731	14025	962	1670.27	2257.99	34.0513	7598	0.541481
SPAC26A3.05.1	SPAC26A3.05	chc1	Other	mRNA	5234	390	1	94.1998	127.346	43.3695	263	0.474731
SPAC26A3.06.1	SPAC26A3.06	bud23	Other	mRNA	919	1086	406	77.4686	104.728	46.5793	259	0.412829
SPAC26A3.07c.1	SPAC26A3.07c	rpl1101	Translation	mRNA	870	11065	683	1046.02	1414.09	39.9915	1815	0.522325
SPAC26A3.08.1	SPAC26A3.08	smb1	Other	mRNA	1176	1120	108	156.26	211.244	51.3366	616	0.413325
SPAC26A3.09c.1	SPAC26A3.09c	rga2	Other	mRNA	4294	53	0	25.4696	34.4316	54.152	5	0.368306
SPAC26A3.10.1	SPAC26A3.10	cnt6	Other	mRNA	3622	144	1	61.6585	83.3545	54.2118	93	0.394944
SPAC26A3.11.1	SPAC26A3.11	-	Other	mRNA	1479	331	10	22.4521	30.3524	39.4133	30	0.342504
SPAC26A3.12c.1	SPAC26A3.12c	dhp1	Other	mRNA	4940	755	0	50.1684	67.8213	50.4179	274	0.376529
SPAC26A3.13c.1	SPAC26A3.13c	Tf2-4	Other	mRNA	4002	0	0	158.198	213.863	0	0	0
SPAC26A3.14c.1	SPAC26A3.14c	-	Other	mRNA	797	331	20	101.585	137.33	64.2001	220	0.436558
SPAC26A3.15c.1	SPAC26A3.15c	nsp1	Other	mRNA	2719	358	4	76.9383	104.011	43.2018	65	0.373414
SPAC26A3.16.1	SPAC26A3.16	dsk2	Other	mRNA	1676	1024	56	108.134	146.184	42.6878	612	0.416849
SPAC26A3.17c.1	SPAC26A3.17c	rmt2	Other	mRNA	1325	1092	86	74.8872	101.238	38.9695	102	0.361268
SPAC26F1.01.1	SPAC26F1.01	sec74	Other	mRNA	3418	56	1	22.4516	30.3518	43.8442	12	0.419249
SPAC26F1.02.1	SPAC26F1.02	pnn1	Other	mRNA	1333	529	21	29.6463	40.078	43.765	133	0.408828
SPAC26F1.03.1	SPAC26F1.03	pda1	Other	mRNA	1657	1994	226	356.425	481.841	41.0991	132	0.465042
SPAC26F1.04c.1	SPAC26F1.04c	etr1	Other	mRNA	1929	81	5	22.6278	30.5899	47.119	10	0.3731
SPAC26F1.05.1	SPAC26F1.05	mug106	Other	mRNA	1195	21	0	3.59244	4.85652	45.8021	14	0.179966
SPAC26F1.06.1	SPAC26F1.06	gpm1	Other	mRNA	781	30234	9102	4150.41	5610.82	37.0441	5357	0.442096
SPAC26F1.07.1	SPAC26F1.07	-	Other	mRNA	1324	926	86	248.65	336.143	42.959	490	0.501836
SPAC26F1.08c.1	SPAC26F1.08c	-	Other	mRNA	3448	86	0	16.2396	21.9539	43.0918	11	0.586552
SPAC26F1.09.1	SPAC26F1.09	gyp51	Other	mRNA	3458	104	2	17.9978	24.3307	41.1338	21	0.433008
SPAC26F1.10c.1	SPAC26F1.10c	pyp1	Other	mRNA	1887	173	10	49.5094	66.9304	41.9269	128	0.396208
SPAC26F1.11.1	SPAC26F1.11	-	Other	mRNA	1879	7	0	1.18558	1.60275	85.0871	7	0.473906
SPAC26F1.12c.1	SPAC26F1.12c	hgh1	Other	mRNA	1315	737	279	79.9037	108.02	42.499	332	0.485349
SPAC26F1.13c.1	SPAC26F1.13c	lrs1	Translation	mRNA	3713	514	11	144.406	195.219	42.8491	247	0.427413
SPAC26F1.14c.1	SPAC26F1.14c	aif1	Other	mRNA	2231	52	0	14.489	19.5872	52.4431	32	0.700809
SPAC26H5.02c.1	SPAC26H5.02c	mgs1	Other	mRNA	1945	110	17	14.5913	19.7255	57.3568	28	0.441855
SPAC26H5.03.1	SPAC26H5.03	pcf2	Other	mRNA	2243	139	6	19.636	26.5454	56.1631	86	0.382124
SPAC26H5.04.1	SPAC26H5.04	gid5	Other	mRNA	2862	160	2	15.008	20.2889	40.3161	115	0.517224
SPAC26H5.05.1	SPAC26H5.05	mga2	Other	mRNA	3806	76	0	35.4237	47.8883	56.2933	58	0.358652
SPAC26H5.06.1	SPAC26H5.06	pot1	Other	mRNA	3088	117	1	15.3675	20.7748	41.7188	16	0.687008
SPAC26H5.07c.1	SPAC26H5.07c	-	Other	mRNA	1713	700	201	278.774	376.867	47.0092	389	0.383418
SPAC26H5.08c.1	SPAC26H5.08c	bgl2	Other	mRNA	1654	107	7	63.611	85.9939	55.9867	18	0.555268
SPAC26H5.09c.1	SPAC26H5.09c	-	Other	mRNA	1554	91	16	64.9717	87.8334	46.1361	38	0.361257
SPAC26H5.10c.1	SPAC26H5.10c	tif51	Translation	mRNA	1049	30271	8932	2368.62	3202.07	39.6475	5313	0.494162
SPAC26H5.11.1	SPAC26H5.11	mug56	Reproduction	mRNA	4393	123	0	30.9491	41.8393	48.1784	92	0.43011
SPAC26H5.12.1	SPAC26H5.12	rpo41	Other	mRNA	3867	159	3	28.804	38.9393	39.0057	21	0.250293
SPAC26H5.13c.1	SPAC26H5.13c	kei1	Other	mRNA	2935	238	0	71.197	96.2492	56.4634	50	0.338102
SPAC27D7.02c.1	SPAC27D7.02c	grp1	Other	mRNA	2754	241	22	48.972	66.2039	43.2132	28	0.411161
SPAC27D7.03c.1	SPAC27D7.03c	mei2	Reproduction	mRNA	4033	2	0	0.736492	0.995642	44.48	1	0
SPAC27D7.04.1	SPAC27D7.04	omt2	Reproduction	mRNA	1407	405	15	27.5923	37.3013	41.9553	108	0.386354
SPAC27D7.05c.1	SPAC27D7.05c	apc14	Other	mRNA	753	236	53	27.2115	36.7864	40.3347	40	0.342477
SPAC27D7.06.1	SPAC27D7.06	etf1	Other	mRNA	1131	1635	955	131.024	177.128	37.5987	1104	0.514586
SPAC27D7.07c.1	SPAC27D7.07c	smd1	Other	mRNA	778	1950	266	137.651	186.086	39.4523	1428	0.536951
SPAC27D7.08c.1	SPAC27D7.08c	mtl16	Other	mRNA	1528	305	16	27.6094	37.3243	54.3608	163	0.427077
SPAC27D7.09c.1	SPAC27D7.09c	-	Other	mRNA	1434	1212	219	453.7	613.344	40.4552	273	0.504674
SPAC27D7.11c.1	SPAC27D7.11c	-	Other	mRNA	1643	1785	274	989.21	1337.29	42.6175	341	0.54202
SPAC27D7.12c.1	SPAC27D7.12c	but1	Other	mRNA	1060	132	25	18.0607	24.4157	37.3664	25	0.251871
SPAC27D7.13c.1	SPAC27D7.13c	ssm4	Reproduction	mRNA	2013	44	6	5.7869	7.82315	82.78	28	0.681807
SPAC27D7.14c.1	SPAC27D7.14c	tpr1	Other	mRNA	3324	110	3	51.4299	69.5266	39.5025	16	0.511991
SPAC27E2.01.1	SPAC27E2.01	-	Other	mRNA	2137	215	8	27.1035	36.6405	52.4939	149	0.593608
SPAC27E2.02.1	SPAC27E2.02	yih1	Translation	mRNA	1413	262	18	39.2666	53.0834	54.5367	166	0.460812
SPAC27E2.03c.1	SPAC27E2.03c	-	Other	mRNA	1563	1559	127	538.694	728.245	43.1849	688	0.379114
SPAC27E2.04c.1	SPAC27E2.04c	mug155	Other	mRNA	839	9	0	2.12968	2.87906	55.5578	9	0.600414
SPAC27E2.05.1	SPAC27E2.05	cdc1	Reproduction	mRNA	1459	166	73	53.9494	72.9327	48.5659	93	0.361042
SPAC27E2.06c.1	SPAC27E2.06c	msm1	Translation	mRNA	2317	91	3	18.4781	24.98	53.615	16	0.357682
SPAC27E2.07.1	SPAC27E2.07	pvg2	Other	mRNA	2182	128	0	42.3692	57.2778	63.5931	89	0.360984
SPAC27E2.08.1	SPAC27E2.08	Tf2-6	Other	mRNA	4002	0	0	162.24	219.327	0	0	0
SPAC27E2.09.1	SPAC27E2.09	mak2	Other	mRNA	7336	130	0	15.7369	21.2743	47.5924	85	0.391039
SPAC27E2.10c.1	SPAC27E2.10c	rfc3	Other	mRNA	1309	285	18	28.7185	38.8237	51.074	196	0.60923
SPAC27E2.11c.1	SPAC27E2.11c	-	Other	mRNA	652	89	2	3664.93	4954.52	49.4346	67	0.311988
SPAC27E2.12.1	SPAC27E2.12	-	Other	mRNA	231	4	3	0.100456	0.135803	39.94	2	0.170669
SPAC27E2.14.1	SPAC27E2.14	-	Other	mRNA	423	176	99	11.63	15.7223	40.271	83	0.398939
SPAC27F1.02c.1	SPAC27F1.02c	cdc8	Reproduction	mRNA	980	3011	524	476.134	643.672	42.3913	1870	0.414858
SPAC27F1.03c.1	SPAC27F1.03c	uch1	Other	mRNA	864	333	53	53.4741	72.2902	59.7834	29	0.644682
SPAC27F1.04c.1	SPAC27F1.04c	nuf2	Reproduction	mRNA	1735	330	22	20.8245	28.1521	43.9663	27	0.430669
SPAC27F1.05c.1	SPAC27F1.05c	-	Other	mRNA	2210	54	3	5.90106	7.97748	60.103	10	0.651497
SPAC27F1.06c.1	SPAC27F1.06c	ani2	Other	mRNA	1305	1365	158	229.563	310.34	42.3701	154	0.397723
SPAC27F1.07.1	SPAC27F1.07	ost1	Other	mRNA	1772	900	65	236.845	320.185	46.0602	516	0.380619
SPAC27F1.08.1	SPAC27F1.08	pdt1	Other	mRNA	2174	157	31	45.738	61.8319	54.095	74	0.379346
SPAC27F1.09c.1	SPAC27F1.09c	prp10	Other	mRNA	3546	189	11	42.5887	57.5745	51.6214	36	0.302789
SPAC27F1.10.1	SPAC27F1.10	-	Other	mRNA	952	4	0	0.633756	0.856758	67.0267	3	0.437664
SPAC29A4.02c.1	SPAC29A4.02c	-	Translation	mRNA	1478	3844	448	1399.88	1892.46	39.57	2413	0.419423
SPAC29A4.03c.1	SPAC29A4.03c	mrps9	Translation	mRNA	1404	1195	77	93.8622	126.89	42.3662	544	0.398733
SPAC29A4.04c.1	SPAC29A4.04c	cbf5	Other	mRNA	1869	2354	421	481.04	650.305	41.7518	1459	0.432715
SPAC29A4.05.1	SPAC29A4.05	cam2	Reproduction	mRNA	899	1471	352	157.558	212.998	36.8443	237	0.432838
SPAC29A4.06c.1	SPAC29A4.06c	-	Other	mRNA	1287	200	38	32.9778	44.5817	54.7197	144	0.436344
SPAC29A4.07.1	SPAC29A4.07	srb6	Other	mRNA	2248	218	0	14.5136	19.6205	39.8829	35	0.30459
SPAC29A4.08c.1	SPAC29A4.08c	prp19	Other	mRNA	1614	856	211	122.41	165.482	49.9284	147	0.560544
SPAC29A4.09.1	SPAC29A4.09	-	Other	mRNA	1154	512	15	103.438	139.835	46.9827	288	0.411346
SPAC29A4.10.1	SPAC29A4.10	rrn5	Other	mRNA	2666	88	6	31.4481	42.5138	76.86	6	0.501376
SPAC29A4.11.1	SPAC29A4.11	rga3	Other	mRNA	5802	5	0	2.80367	3.7902	61.424	5	0.45135
SPAC29A4.12c.1	SPAC29A4.12c	mug108	Other	mRNA	1090	19	2	9.96335	13.4692	80.8438	13	0.65492
SPAC29A4.13.1	SPAC29A4.13	ure6	Other	mRNA	1297	219	25	27.1235	36.6675	51.2649	37	0.312918
SPAC29A4.14c.1	SPAC29A4.14c	pex3	Other	mRNA	2057	242	17	34.8473	47.1091	67.3277	22	0.663779
SPAC29A4.15.1	SPAC29A4.15	srs1	Translation	mRNA	1684	1462	244	285.091	385.407	46.0788	113	0.414142
SPAC29A4.16.1	SPAC29A4.16	hal4	Other	mRNA	2838	427	9	148.029	200.117	40.665	30	0.437336
SPAC29A4.17c.1	SPAC29A4.17c	fun14	Other	mRNA	1014	22	1	12.518	16.9228	30.025	4	0.372811
SPAC29A4.18.1	SPAC29A4.18	prw1	Other	mRNA	1538	274	45	81.4899	110.164	49.2411	152	0.438759
SPAC29A4.19c.1	SPAC29A4.19c	cta5	Other	mRNA	6325	177	0	9.84342	13.307	53.8201	87	0.351606
SPAC29A4.20.1	SPAC29A4.20	elp3	Other	mRNA	2026	251	11	68.6192	92.7644	41.7303	29	0.430271
SPAC29A4.22.1	SPAC29A4.22	-	Other	mRNA	222	2	1	1.98603	2.68486	49.85	2	0.992361
SPAC29A4.23.1	SPAC29A4.23	-	Other	mRNA	549	7	6	0.803096	1.08568	28.5025	4	0.817508
SPAC29B12.01.1	SPAC29B12.01	ino80	Other	mRNA	5150	163	1	30.5723	41.3299	36.8533	73	0.501522
SPAC29B12.02c.1	SPAC29B12.02c	set2	Other	mRNA	2953	192	3	61.5454	83.2014	47.0247	15	0.620232
SPAC29B12.03.1	SPAC29B12.03	spd1	Other	mRNA	1403	842	14	145.897	197.234	46.5422	425	0.377428
SPAC29B12.04.1	SPAC29B12.04	snz1	Other	mRNA	1303	1571	229	489.322	661.501	62.6674	1114	0.527446
SPAC29B12.05c.1	SPAC29B12.05c	mtq1	Translation	mRNA	1212	201	17	14.666	19.8266	40.1983	12	0.349015
SPAC29B12.06c.1	SPAC29B12.06c	rcd1	Translation	mRNA	1608	387	94	117.455	158.784	64.6688	74	0.812209
SPAC29B12.07.1	SPAC29B12.07	sec16	Other	mRNA	6534	81	0	21.0531	28.461	43.4529	45	0.400857
SPAC29B12.08.1	SPAC29B12.08	clr5	Other	mRNA	3631	88	1	87.7274	118.596	65.3662	68	0.251566
SPAC29B12.10c.1	SPAC29B12.10c	pgt1	Other	mRNA	3334	129	2	36.875	49.8503	49.895	10	0.496549
SPAC29B12.11c.1	SPAC29B12.11c	-	Other	mRNA	1424	103	26	66.9921	90.5647	63.4243	14	0.20467
SPAC29B12.12.1	SPAC29B12.12	hot13	Other	mRNA	342	53	50	7.32797	9.90648	52.1743	14	0.502357
SPAC29B12.13.1	SPAC29B12.13	-	Other	mRNA	507	254	158	12.9528	17.5106	50.5297	102	0.608646
SPAC29B12.14c.1	SPAC29B12.14c	-	Other	mRNA	2906	99	1	24.986	33.7778	62.9022	23	0.222062
SPAC29E6.01.1	SPAC29E6.01	pof11	Other	mRNA	2010	139	10	20.2497	27.3751	51.884	103	0.40391
SPAC29E6.02.1	SPAC29E6.02	prp3	Other	mRNA	5537	314	0	22.2204	30.0391	40.381	31	0.479933
SPAC29E6.03c.1	SPAC29E6.03c	uso1	Other	mRNA	3275	187	9	33.3163	45.0394	39.2044	34	0.418173
SPAC29E6.04.1	SPAC29E6.04	nnf1	Reproduction	mRNA	618	186	172	27.7111	37.4619	41.3517	12	0.419511
SPAC29E6.05c.1	SPAC29E6.05c	mxr1	Other	mRNA	1604	381	6	18.923	25.5814	42.2312	66	0.474372
SPAC29E6.06c.1	SPAC29E6.06c	-	Translation	mRNA	2433	450	64	116.503	157.497	45.3126	35	0.649121
SPAC29E6.07.1	SPAC29E6.07	-	Other	mRNA	351	2	1	1.85113	2.50249	53.54	1	0
SPAC29E6.08.1	SPAC29E6.08	tbp1	Other	mRNA	1301	3468	946	220.976	298.731	61.2136	2195	0.523447
SPAC29E6.09.1	SPAC29E6.09	-	Other	mRNA	1317	303	40	32.8609	44.4237	49.9948	207	0.352862
SPAC29E6.10c.1	SPAC29E6.10c	nst1	Other	mRNA	3705	129	0	39.5522	53.4696	43.4625	32	0.520841
SPAC2C4.03c.1	SPAC2C4.03c	smd2	Other	mRNA	491	1013	823	174.866	236.397	46.5074	831	0.483901
SPAC2C4.04c.1	SPAC2C4.04c	aim29	Other	mRNA	1114	754	26	46.5563	62.9381	39.9627	120	0.588988
SPAC2C4.05.1	SPAC2C4.05	cor1	Other	mRNA	934	1596	329	368.302	497.898	50.7236	719	0.362966
SPAC2C4.06c.1	SPAC2C4.06c	rcm1	Other	mRNA	1707	244	27	50.9781	68.9159	52.2689	131	0.401303
SPAC2C4.07c.1	SPAC2C4.07c	dis32	Other	mRNA	3267	76	4	27.4883	37.1607	49.025	6	0.499111
SPAC2C4.08.1	SPAC2C4.08	-	Other	mRNA	843	60	35	14.0388	18.9786	58.8197	35	0.282681
SPAC2C4.09.1	SPAC2C4.09	-	Other	mRNA	1372	330	14	22.5287	30.4559	58.2665	244	0.346014
SPAC2C4.10c.1	SPAC2C4.10c	csc4	Other	mRNA	990	503	185	45.7776	61.8855	42.9014	86	0.786798
SPAC2C4.11c.1	SPAC2C4.11c	pno1	Other	mRNA	1192	1394	103	188.951	255.438	47.8264	978	0.384106
SPAC2C4.12c.1	SPAC2C4.12c	tpt1	Other	mRNA	1768	449	33	39.3754	53.2305	43.7365	74	0.41964
SPAC2C4.13.1	SPAC2C4.13	vma16	Other	mRNA	3090	937	0	38.345	51.8375	49.114	127	0.457019
SPAC2C4.14c.1	SPAC2C4.14c	ppk11	Other	mRNA	2078	218	8	39.6209	53.5624	47.8714	21	0.330133
SPAC2C4.15c.1	SPAC2C4.15c	ubx2	Other	mRNA	1465	289	55	52.0653	70.3856	42.8756	32	0.534913
SPAC2C4.16c.1	SPAC2C4.16c	rps801	Translation	mRNA	711	23041	4088	2562.33	3463.95	37.0307	5555	0.517414
SPAC2C4.17c.1	SPAC2C4.17c	msy2	Other	mRNA	3768	76	0	26.5247	35.858	53.07	27	0.401022
SPAC2E12.02.1	SPAC2E12.02	hsf1	Other	mRNA	2442	258	20	96.0803	129.888	51.1944	143	0.493229
SPAC2E12.03c.1	SPAC2E12.03c	-	Other	mRNA	2000	97	1	12.6236	17.0656	48.9673	30	0.3209
SPAC2E12.05.1	SPAC2E12.05	wtf1	Other	pseudogenic_transcript	1794	625	6	23.1923	31.353	51.3594	369	0.45436
SPAC2E1P3.01.1	SPAC2E1P3.01	-	Other	mRNA	1960	135	9	16.7291	22.6156	54.0243	115	0.323716
SPAC2E1P3.02c.1	SPAC2E1P3.02c	amt3	Other	mRNA	2384	120	0	6.07385	8.21107	44.1561	28	0.358713
SPAC2E1P3.03c.1	SPAC2E1P3.03c	Tf2-3	Other	mRNA	4002	0	0	164.275	222.078	0	0	0
SPAC2E1P3.04.1	SPAC2E1P3.04	cao1	Other	mRNA	3353	152	0	23.2398	31.4173	44.5472	74	0.365853
SPAC2E1P3.05c.1	SPAC2E1P3.05c	-	Other	mRNA	1964	209	1	21.4566	29.0065	52.9291	46	0.423528
SPAC2E1P5.01c.1	SPAC2E1P5.01c	mns1	Other	mRNA	2204	174	13	41.9568	56.7203	42.6744	18	0.396273
SPAC2E1P5.02c.1	SPAC2E1P5.02c	mug109	Other	mRNA	876	187	92	16.7682	22.6684	52.3155	69	0.318158
SPAC2E1P5.03.1	SPAC2E1P5.03	erj5	Other	mRNA	2199	1753	10	85.0014	114.911	42.4745	286	0.487366
SPAC2E1P5.04c.1	SPAC2E1P5.04c	cwg2	Other	mRNA	1537	94	8	8.99826	12.1645	43.7048	46	0.392796
SPAC2E1P5.05.1	SPAC2E1P5.05	rrp9	Other	mRNA	1906	621	50	107.808	145.743	43.0947	303	0.503824
SPAC2F3.01.1	SPAC2F3.01	imt1	Other	mRNA	1143	160	78	61.434	83.0509	46.8675	116	0.359532
SPAC2F3.02.1	SPAC2F3.02	sec67	Other	mRNA	2807	707	0	39.2761	53.0963	46.2144	205	0.392097
SPAC2F3.03c.1	SPAC2F3.03c	rpa49	Other	mRNA	1817	944	51	161.619	218.489	46.8563	117	0.542998
SPAC2F3.04c.1	SPAC2F3.04c	rim1	Other	mRNA	1045	607	36	82.8505	112.003	47.7955	91	0.394825
SPAC2F3.05c.1	SPAC2F3.05c	-	Other	mRNA	1326	88	9	16.7302	22.6171	47.3971	28	0.417318
SPAC2F3.06c.1	SPAC2F3.06c	kap104	Other	mRNA	3520	242	1	74.8501	101.188	43.8224	41	0.414797
SPAC2F3.07c.1	SPAC2F3.07c	-	Other	mRNA	306	0	0	0	0	0	0	0
SPAC2F3.08.1	SPAC2F3.08	sut1	Other	mRNA	2893	104	0	11.358	15.3545	55.0353	45	0.512299
SPAC2F3.09.1	SPAC2F3.09	hem1	Other	mRNA	2489	540	32	121.48	164.226	54.1688	354	0.391961
SPAC2F3.10.1	SPAC2F3.10	vps54	Other	mRNA	3386	53	0	23.9728	32.4082	64.9246	24	0.412995
SPAC2F3.11.1	SPAC2F3.11	ppx1	Other	mRNA	1400	1614	88	94.379	127.588	50.7605	358	0.504459
SPAC2F3.12c.1	SPAC2F3.12c	plp1	Other	mRNA	958	399	85	46.2651	62.5446	54.8841	225	0.689016
SPAC2F3.13c.1	SPAC2F3.13c	qtr2	Other	mRNA	1093	155	83	51.8243	70.0599	54.4851	80	0.759738
SPAC2F3.14c.1	SPAC2F3.14c	saf2	Other	mRNA	1284	198	50	44.5129	60.1757	49.7786	43	0.393147
SPAC2F3.15.1	SPAC2F3.15	lsk1	Other	mRNA	2875	132	2	30.4614	41.1799	44.8053	43	0.482748
SPAC2F3.16.1	SPAC2F3.16	-	Other	mRNA	2157	267	18	59.4601	80.3824	60.2724	87	0.371863
SPAC2F3.17c.1	SPAC2F3.17c	lsm6	Other	mRNA	432	2951	707	138.963	187.86	35.902	2297	0.586693
SPAC2F3.18c.1	SPAC2F3.18c	-	Other	mRNA	680	2550	211	177.452	239.892	42.0156	1878	0.454058
SPAC2F7.02c.1	SPAC2F7.02c	psr1	Other	mRNA	1938	298	27	76.0816	102.853	52.4344	39	0.366579
SPAC2F7.03c.1	SPAC2F7.03c	pom1	Other	mRNA	3750	71	0	49.8758	67.4257	42.415	2	0.71836
SPAC2F7.04.1	SPAC2F7.04	med1	Other	mRNA	2037	224	19	42.8106	57.8745	56.4525	52	0.328215
SPAC2F7.05c.1	SPAC2F7.05c	tif5	Translation	mRNA	1722	3700	290	414.999	561.026	42.9806	348	0.394964
SPAC2F7.06c.1	SPAC2F7.06c	pol4	Reproduction	mRNA	2160	7	1	0.61236	0.827833	40.83	1	0
SPAC2F7.07c.1	SPAC2F7.07c	cph2	Other	mRNA	2114	226	51	72.9088	98.5634	67.1274	19	0.457869
SPAC2F7.08c.1	SPAC2F7.08c	snf5	Other	mRNA	1899	33	5	18.6717	25.2418	48.488	5	0.255842
SPAC2F7.09c.1	SPAC2F7.09c	gep3	Other	mRNA	1959	123	24	20.7295	28.0237	45.206	20	0.288945
SPAC2F7.10.1	SPAC2F7.10	akr1	Other	mRNA	2966	149	2	22.3133	30.1648	50.7866	96	0.477279
SPAC2F7.11.1	SPAC2F7.11	nrd1	Reproduction	mRNA	3775	40	0	33.1389	44.7996	60.2944	9	0.444333
SPAC2F7.13c.1	SPAC2F7.13c	wrs1	Translation	mRNA	1641	1377	105	174.527	235.938	44.34	121	0.386348
SPAC2F7.14c.1	SPAC2F7.14c	rrp4	Other	mRNA	1356	712	320	69.2906	93.672	44.7606	103	0.76369
SPAC2F7.15.1	SPAC2F7.15	rsm24	Translation	mRNA	1288	859	44	74.0838	100.152	45.869	239	0.411008
SPAC2F7.16c.1	SPAC2F7.16c	pld1	Other	mRNA	4451	100	1	24.1489	32.6462	42.8731	13	0.56619
SPAC2F7.17.1	SPAC2F7.17	mrf1	Translation	mRNA	1948	611	20	31.1627	42.128	46.3756	64	0.370719
SPAC2G11.02.1	SPAC2G11.02	urb2	Other	mRNA	4243	158	1	37.8569	51.1776	50.5624	75	0.445481
SPAC2G11.03c.1	SPAC2G11.03c	vps45	Other	mRNA	2599	196	3	42.7944	57.8526	48.1628	39	0.383169
SPAC2G11.04.1	SPAC2G11.04	-	Other	mRNA	1273	200	24	29.5306	39.9216	54.9395	66	0.438171
SPAC2G11.05c.1	SPAC2G11.05c	rim20	Other	mRNA	2597	144	2	9.81107	13.2633	64.2862	105	0.624975
SPAC2G11.06.1	SPAC2G11.06	vps4	Other	mRNA	1509	434	74	52.8231	71.41	45.641	20	0.516495
SPAC2G11.07c.1	SPAC2G11.07c	ptc3	Other	mRNA	1856	1170	112	254.332	343.825	45.4858	152	0.4622
SPAC2G11.08c.1	SPAC2G11.08c	smn1	Other	mRNA	1128	159	15	18.2885	24.7237	52.0927	22	0.503133
SPAC2G11.09.1	SPAC2G11.09	-	Other	mRNA	2798	68	2	73.9698	99.9977	84.3494	50	0.818061
SPAC2G11.10c.1	SPAC2G11.10c	uba42	Other	mRNA	1543	133	12	14.0164	18.9484	54.6848	88	0.673841
SPAC2G11.11c.1	SPAC2G11.11c	prh1	Other	mRNA	3183	201	4	51.1857	69.1965	46.1131	39	0.420099
SPAC2G11.12.1	SPAC2G11.12	rqh1	Other	mRNA	4177	199	0	20.2164	27.33	44.7027	59	0.403718
SPAC2G11.13.1	SPAC2G11.13	atg22	Other	mRNA	2051	88	2	27.4933	37.1674	58.3021	63	0.286599
SPAC2G11.14.1	SPAC2G11.14	taf1	Other	mRNA	3207	184	5	45.0719	60.9314	48.988	50	0.517959
SPAC2G11.15c.1	SPAC2G11.15c	tgs1	Other	mRNA	955	291	136	50.3469	68.0625	46.4233	88	0.404326
SPAC2H10.01.1	SPAC2H10.01	-	Other	mRNA	2972	31	0	38.5635	52.1329	65.49	4	0.439076
SPAC2H10.02c.1	SPAC2H10.02c	nas2	Other	mRNA	855	196	68	41.9051	56.6504	52.8342	114	0.483937
SPAC2H10.04.1	SPAC2H10.04	-	Other	mRNA	375	0	0	0.866329	1.17117	0	0	0
SPAC30.01c.1	SPAC30.01c	sec72	Other	mRNA	5681	190	0	23.7934	32.1657	46.6793	28	0.80022
SPAC30.02c.1	SPAC30.02c	kti12	Other	mRNA	1006	874	384	80.8723	109.329	51.8245	266	0.398175
SPAC30.03c.1	SPAC30.03c	tsn1	Other	mRNA	1041	961	369	68.9024	93.1472	48.8908	651	0.608006
SPAC30.04c.1	SPAC30.04c	abc4	Other	mRNA	4696	246	1	58.2256	78.7135	39.3844	27	0.358252
SPAC30C2.02.1	SPAC30C2.02	mmd1	Translation	mRNA	1414	1036	328	156.676	211.806	48.6649	752	0.419486
SPAC30C2.03.1	SPAC30C2.03	-	Other	mRNA	825	350	142	27.0306	36.5419	45.4537	199	0.362853
SPAC30C2.04.1	SPAC30C2.04	asc1	Translation	mRNA	1531	3090	208	442.491	598.191	35.2375	2036	0.480489
SPAC30C2.05.1	SPAC30C2.05	erv14	Other	mRNA	956	1648	34	76.6307	103.595	44.032	1270	0.416722
SPAC30C2.06c.1	SPAC30C2.06c	dml1	Other	mRNA	1778	173	25	25.685	34.7228	41.8328	18	0.530864
SPAC30C2.07.1	SPAC30C2.07	lst4	Other	mRNA	2888	265	2	66.6508	90.1033	46.268	93	0.320342
SPAC30C2.08.1	SPAC30C2.08	-	Other	mRNA	1992	434	54	124.006	167.64	53.2949	219	0.420184
SPAC30D11.01c.1	SPAC30D11.01c	gto2	Other	mRNA	3894	91	0	8.9448	12.0922	48.4297	66	0.460882
SPAC30D11.02c.1	SPAC30D11.02c	-	Other	mRNA	710	10	3	1.07855	1.45807	65.6214	7	0.383357
SPAC30D11.03.1	SPAC30D11.03	ddx27	Other	mRNA	2423	401	21	107.129	144.825	44.384	90	0.52469
SPAC30D11.04c.1	SPAC30D11.04c	nup124	Other	mRNA	3656	150	2	58.0321	78.452	45.384	42	0.348589
SPAC30D11.05.1	SPAC30D11.05	aps3	Other	mRNA	1369	280	46	60.5472	81.8521	40.7782	33	0.357062
SPAC30D11.06c.1	SPAC30D11.06c	hfl1	Other	mRNA	1939	186	19	40.9173	55.315	54.1471	110	0.502736
SPAC30D11.07.1	SPAC30D11.07	nth1	Other	mRNA	1456	201	11	27.6518	37.3818	48.7635	17	0.303269
SPAC30D11.08c.1	SPAC30D11.08c	phf2	Other	mRNA	1807	185	26	57.1463	77.2544	49.3623	78	0.358685
SPAC30D11.09.1	SPAC30D11.09	cwf19	Other	mRNA	2119	237	18	38.7119	52.3335	43.1056	54	0.875035
SPAC30D11.10.1	SPAC30D11.10	rad52	Reproduction	mRNA	2095	46	0	20.5801	27.8217	50.6433	9	0.251006
SPAC30D11.11.1	SPAC30D11.11	izh3	Other	mRNA	2106	159	10	68.3816	92.4432	58.02	24	0.482925
SPAC30D11.12.1	SPAC30D11.12	rpl3802	Translation	mRNA	488	41183	1373	1114.47	1506.62	38.9984	31047	0.479974
SPAC30D11.13.1	SPAC30D11.13	hus5	Other	mRNA	866	390	30	77.3865	104.617	53.1779	315	0.614303
SPAC30D11.14c.1	SPAC30D11.14c	-	Other	mRNA	1993	255	12	52.6746	71.2093	43.3253	170	0.435291
SPAC31A2.02.1	SPAC31A2.02	trm112	Translation	mRNA	817	1168	275	86.5723	117.035	49.3095	899	0.551615
SPAC31A2.03.1	SPAC31A2.03	mrp11	Translation	mRNA	1078	1297	116	97.815	132.233	40.3406	208	0.473461
SPAC31A2.04c.1	SPAC31A2.04c	pre1	Other	mRNA	854	2726	266	172.246	232.854	41.2077	369	0.401276
SPAC31A2.05c.1	SPAC31A2.05c	mis4	Other	mRNA	5084	131	0	12.4562	16.8391	57.7304	55	0.403274
SPAC31A2.06.1	SPAC31A2.06	atp25	Other	mRNA	5062	497	0	26.7305	36.1362	51.7448	245	0.488549
SPAC31A2.07c.1	SPAC31A2.07c	dbp10	Other	mRNA	2705	393	60	90.7878	122.734	48.9323	74	0.503002
SPAC31A2.08.1	SPAC31A2.08	mrp20	Translation	mRNA	1022	1134	97	83.4889	112.866	42.3794	135	0.568671
SPAC31A2.09c.1	SPAC31A2.09c	apm4	Other	mRNA	2575	292	7	29.8469	40.3492	51.4016	159	0.426678
SPAC31A2.10.1	SPAC31A2.10	-	Other	mRNA	1848	419	20	31.5682	42.6761	48.8506	132	0.438483
SPAC31A2.11c.1	SPAC31A2.11c	cuf1	Other	mRNA	2159	295	6	41.692	56.3623	48.1138	76	0.401826
SPAC31A2.12.1	SPAC31A2.12	rod1	Other	mRNA	2798	198	1	45.5811	61.6199	60.0309	123	0.45102
SPAC31A2.13c.1	SPAC31A2.13c	sft1	Other	mRNA	632	475	45	29.1901	39.4613	39.8838	362	0.515274
SPAC31A2.14.1	SPAC31A2.14	bun107	Other	mRNA	3486	140	1	29.4758	39.8476	54.6963	19	0.371885
SPAC31A2.15c.1	SPAC31A2.15c	dcc1	Other	mRNA	1990	473	17	39.0174	52.7466	49.0728	134	0.405746
SPAC31A2.16.1	SPAC31A2.16	gef2	Other	mRNA	3902	102	2	20.9275	28.2913	56.8079	70	0.499117
SPAC31F12.01.1	SPAC31F12.01	zds1	Reproduction	mRNA	4793	67	0	19.8791	26.8741	49.2907	28	0.321
SPAC31G5.01.1	SPAC31G5.01	sap49	Other	mRNA	1481	458	20	55.3103	74.7724	43.2943	213	0.427202
SPAC31G5.02.1	SPAC31G5.02	rot1	Other	mRNA	1153	608	51	133.496	180.469	54.9221	418	0.36488
SPAC31G5.03.1	SPAC31G5.03	rps1101	Translation	mRNA	619	13854	958	2191.83	2963.07	41.3243	9757	0.449325
SPAC31G5.04.1	SPAC31G5.04	lys12	Other	mRNA	1507	252	15	186.735	252.442	47.7278	199	0.36729
SPAC31G5.05c.1	SPAC31G5.05c	-	Other	mRNA	1097	2322	214	193.786	261.974	37.7806	1513	0.55329
SPAC31G5.06.1	SPAC31G5.06	rrg8	Other	mRNA	705	10	7	6.0564	8.18748	55.01	5	0.236954
SPAC31G5.07.1	SPAC31G5.07	dni1	Reproduction	mRNA	705	17	4	5.29935	7.16405	59.685	10	0.190246
SPAC31G5.08.1	SPAC31G5.08	hem4	Other	mRNA	2322	463	12	31.7798	42.9622	45.7444	80	0.352804
SPAC31G5.09c.1	SPAC31G5.09c	spk1	Reproduction	mRNA	2142	31	0	3.1092	4.20324	58.6486	14	0.252049
SPAC31G5.10.1	SPAC31G5.10	eta2	Other	mRNA	1710	14	3	2.07626	2.80684	47.752	10	0.356492
SPAC31G5.11.1	SPAC31G5.11	pac2	Reproduction	mRNA	708	135	122	113.83	153.884	50.5798	45	0.317848
SPAC31G5.12c.1	SPAC31G5.12c	maf1	Other	mRNA	1444	91	8	23.2374	31.414	52.3539	57	0.374828
SPAC31G5.13.1	SPAC31G5.13	rpn11	Other	mRNA	1676	799	78	151.845	205.275	45.9694	276	0.475542
SPAC31G5.14.1	SPAC31G5.14	gcv1	Other	mRNA	1963	675	29	65.8211	88.9817	46.2856	285	0.407048
SPAC31G5.15.1	SPAC31G5.15	psd3	Other	mRNA	3313	79	2	9.90408	13.389	63.8438	13	1.01446
SPAC31G5.16c.1	SPAC31G5.16c	dpm1	Other	mRNA	4336	1872	0	45.795	61.909	37.4395	189	0.438842
SPAC31G5.17c.1	SPAC31G5.17c	rps1001	Translation	mRNA	835	8859	613	1025.81	1386.76	39.4268	5921	0.491961
SPAC31G5.18c.1	SPAC31G5.18c	sde2	Other	mRNA	1144	310	96	42.9216	58.0245	59.44	25	0.393195
SPAC31G5.19.1	SPAC31G5.19	abo1	Other	mRNA	5046	101	0	21.2554	28.7345	40.3149	35	0.437856
SPAC31G5.21.1	SPAC31G5.21	-	Other	mRNA	697	193	12	41.7827	56.4849	48.73	44	0.375595
SPAC323.01c.1	SPAC323.01c	pos5	Other	mRNA	1417	321	85	48.7195	65.8626	38.4159	49	0.462857
SPAC323.02c.1	SPAC323.02c	pup2	Other	mRNA	934	2801	773	237.792	321.464	40.6738	1349	0.459186
SPAC323.03c.1	SPAC323.03c	-	Other	mRNA	1977	129	13	27.2664	36.8607	48.0724	58	0.464122
SPAC323.04.1	SPAC323.04	-	Other	mRNA	1778	273	30	47.2849	63.9232	46.1438	29	0.467799
SPAC323.05c.1	SPAC323.05c	mtq2	Translation	mRNA	1964	345	12	27.8841	37.6957	58.429	191	0.454388
SPAC323.06c.1	SPAC323.06c	uba5	Other	mRNA	1789	180	6	21.9989	29.7397	58.0548	142	0.459966
SPAC323.07c.1	SPAC323.07c	-	Other	mRNA	2422	101	1	32.5467	43.999	54.8843	21	0.292794
SPAC323.08.1	SPAC323.08	rmp1	Other	mRNA	694	8	5	12.3048	16.6345	70.6475	4	0.165628
SPAC328.01c.1	SPAC328.01c	msn5	Other	mRNA	4438	140	3	38.9281	52.6258	37.0886	21	0.382529
SPAC328.02.1	SPAC328.02	dbl4	Reproduction	mRNA	3994	164	0	12.2824	16.6042	48.25	131	0.404626
SPAC328.03.1	SPAC328.03	tps1	Reproduction	mRNA	2208	330	22	142.836	193.096	53.0184	198	0.498241
SPAC328.04.1	SPAC328.04	spg4	Other	mRNA	3101	44	1	22.0902	29.8632	52.9904	26	0.402676
SPAC328.05.1	SPAC328.05	hrb1	Other	mRNA	1984	39	3	23.9538	32.3825	61.3946	24	0.203245
SPAC328.06.1	SPAC328.06	ubp2	Other	mRNA	3823	234	1	49.1601	66.4582	43.367	129	0.466072
SPAC328.07c.1	SPAC328.07c	bsd1	Other	mRNA	1506	196	23	65.7019	88.8206	55.1643	122	0.255156
SPAC328.08c.1	SPAC328.08c	tbc1	Other	mRNA	1734	42	0	14.239	19.2493	40.5783	6	0.328952
SPAC328.09.1	SPAC328.09	-	Other	mRNA	1564	82	6	38.5171	52.0702	72.1791	44	0.357008
SPAC328.10c.1	SPAC328.10c	rps502	Translation	mRNA	760	27221	4071	2507.39	3389.67	34.3118	20603	0.495242
SPAC32A11.01.1	SPAC32A11.01	mug8	Other	mRNA	2352	92	1	9.46166	12.791	89.0329	65	0.433231
SPAC32A11.02c.1	SPAC32A11.02c	-	Other	mRNA	3037	99	6	18.0935	24.4601	43.0194	16	0.333492
SPAC32A11.03c.1	SPAC32A11.03c	phx1	Other	mRNA	4722	111	0	20.355	27.5173	45.7896	25	0.552559
SPAC32A11.04c.1	SPAC32A11.04c	tif212	Translation	mRNA	1071	5523	1214	771.233	1042.61	41.4499	2981	0.45186
SPAC343.01c.1	SPAC343.01c	erg8	Other	mRNA	2632	365	4	26.0883	35.268	55.0229	157	0.397168
SPAC343.02.1	SPAC343.02	img1	Translation	mRNA	1271	414	27	71.5327	96.7031	51.1515	155	0.447023
SPAC343.03.1	SPAC343.03	apc11	Other	mRNA	1119	143	37	23.9103	32.3237	53.9254	13	0.394086
SPAC343.04c.1	SPAC343.04c	gid7	Other	mRNA	1912	174	29	39.5654	53.4874	62.3158	26	0.318507
SPAC343.05.1	SPAC343.05	vma1	Other	mRNA	2115	866	96	205.874	278.315	44.6288	164	0.476554
SPAC343.06c.1	SPAC343.06c	-	Other	mRNA	1401	179	37	37.8141	51.1198	61.4787	30	0.599129
SPAC343.07.1	SPAC343.07	mug28	Other	mRNA	1830	13	0	0.126805	0.171424	46.8257	7	0.392094
SPAC343.08c.1	SPAC343.08c	mrp17	Translation	mRNA	2895	260	7	40.535	54.7982	45.8379	121	0.42303
SPAC343.09.1	SPAC343.09	ubx3	Other	mRNA	1833	447	29	107.19	144.907	45.687	183	0.483025
SPAC343.10.1	SPAC343.10	met11	Other	mRNA	2253	266	9	63.2196	85.4648	48.5277	202	0.338713
SPAC343.11c.1	SPAC343.11c	msc1	Other	mRNA	5031	178	1	19.3538	26.1639	44.6135	31	0.617938
SPAC343.12.1	SPAC343.12	rds1	Other	mRNA	1996	163	3	135.767	183.54	46.0439	18	0.329858
SPAC343.13.1	SPAC343.13	gta2	Translation	mRNA	1846	155	8	24.6634	33.3418	51.6174	108	0.470058
SPAC343.14c.1	SPAC343.14c	tif222	Translation	mRNA	1448	977	71	135.145	182.699	54.5913	299	0.430813
SPAC343.15.1	SPAC343.15	tit1	Other	mRNA	1822	140	4	25.5996	34.6074	54.4598	60	0.352655
SPAC343.16.1	SPAC343.16	lys2	Other	mRNA	2389	576	53	116.813	157.916	41.8586	306	0.424274
SPAC343.17c.1	SPAC343.17c	wdr70	Other	mRNA	6403	58	0	3.70023	5.00223	41.7236	11	0.519892
SPAC343.18.1	SPAC343.18	rfp2	Other	mRNA	1214	355	138	30.9658	41.8618	50.3554	217	0.414352
SPAC343.19.1	SPAC343.19	lsb6	Other	mRNA	2707	154	5	22.8109	30.8374	53.8405	101	0.318578
SPAC343.20.1	SPAC343.20	-	Other	mRNA	2010	141	3	25.8028	34.8821	58.2194	32	0.476844
SPAC343.21.1	SPAC343.21	-	Other	mRNA	2592	1	0	0.707258	0.956123	49.03	1	0
SPAC3A11.02.1	SPAC3A11.02	cps3	Other	mRNA	2282	258	13	62.8331	84.9423	53.1703	65	0.432233
SPAC3A11.03.1	SPAC3A11.03	efm3	Translation	mRNA	3532	147	0	6.03783	8.16237	60.2911	99	0.43932
SPAC3A11.04.1	SPAC3A11.04	sei1	Other	mRNA	3394	450	0	12.9017	17.4414	50.1169	325	0.584455
SPAC3A11.05c.1	SPAC3A11.05c	kms1	Reproduction	mRNA	2969	174	0	11.9426	16.1449	59.9853	120	0.386456
SPAC3A11.06.1	SPAC3A11.06	mvp1	Other	mRNA	2242	79	6	15.0285	20.3167	42.7481	47	0.420033
SPAC3A11.07.1	SPAC3A11.07	nde1	Other	mRNA	2504	786	20	433.096	585.491	45.7955	520	0.349704
SPAC3A11.08.1	SPAC3A11.08	pcu4	Reproduction	mRNA	2881	77	0	17.1482	23.1822	51.5804	53	0.626482
SPAC3A11.09.1	SPAC3A11.09	sod22	Other	mRNA	2803	154	9	47.2466	63.8714	57.0011	38	0.379482
SPAC3A11.10c.1	SPAC3A11.10c	dpe1	Other	mRNA	1731	95	8	50.8612	68.7578	52.2015	39	0.308712
SPAC3A11.11c.1	SPAC3A11.11c	-	Other	mRNA	1820	197	7	35.4071	47.8659	41.707	151	0.301888
SPAC3A11.12c.1	SPAC3A11.12c	rpt5	Other	mRNA	1903	690	186	130.269	176.107	47.0497	233	0.401619
SPAC3A11.13.1	SPAC3A11.13	pfd6	Other	mRNA	429	1189	830	138.907	187.784	46.1925	881	0.511496
SPAC3A11.14c.1	SPAC3A11.14c	pkl1	Reproduction	mRNA	3050	139	1	13.459	18.1949	48.9106	36	0.568004
SPAC3A12.02.1	SPAC3A12.02	-	Other	mRNA	990	404	80	26.8853	36.3454	46.8396	233	0.582359
SPAC3A12.03c.1	SPAC3A12.03c	meu34	Other	mRNA	1141	161	78	40.0855	54.1904	60.2075	85	0.376991
SPAC3A12.04c.1	SPAC3A12.04c	rpp1	Other	mRNA	744	98	40	46.3793	62.6989	60.2443	69	0.440609
SPAC3A12.05c.1	SPAC3A12.05c	taf2	Other	mRNA	3721	79	5	34.8359	47.0937	45.09	10	0.486114
SPAC3A12.06c.1	SPAC3A12.06c	-	Other	mRNA	2777	54	3	58.6106	79.234	49.8312	8	0.262207
SPAC3A12.07.1	SPAC3A12.07	rpb11	Other	mRNA	814	1350	635	178.914	241.869	42.9792	979	0.423638
SPAC3A12.08.1	SPAC3A12.08	-	Other	mRNA	1232	227	3	9.64373	13.0371	51.2673	100	0.347046
SPAC3A12.09c.1	SPAC3A12.09c	ure4	Other	mRNA	1996	349	7	14.0208	18.9543	54.873	69	0.382324
SPAC3A12.10.1	SPAC3A12.10	rpl2001	Translation	mRNA	720	11221	1223	2016.89	2726.58	41.1475	7005	0.457328
SPAC3A12.11c.1	SPAC3A12.11c	cwf2	Other	mRNA	1311	952	109	72.0938	97.4616	43.2379	415	0.541283
SPAC3A12.12.1	SPAC3A12.12	atp11	Other	mRNA	1333	297	18	31.4219	42.4785	44.5469	49	0.417505
SPAC3A12.13c.1	SPAC3A12.13c	tif310	Translation	mRNA	1251	1580	183	178.612	241.46	40.5674	945	0.429899
SPAC3A12.14.1	SPAC3A12.14	cam1	Reproduction	mRNA	1550	1287	50	233.699	315.931	50.0961	951	0.438992
SPAC3A12.15.1	SPAC3A12.15	vps53	Other	mRNA	2807	212	3	48.3615	65.3785	53.9591	138	0.510704
SPAC3A12.16c.1	SPAC3A12.16c	tim17	Other	mRNA	1399	1143	61	136.561	184.613	46.517	232	0.439749
SPAC3A12.17c.1	SPAC3A12.17c	cys12	Other	mRNA	1506	110	31	32.3579	43.7437	41.0592	12	0.374386
SPAC3A12.18.1	SPAC3A12.18	zwf1	Other	mRNA	1973	556	71	174.092	235.35	48.2429	390	0.385598
SPAC3A12.19.1	SPAC3A12.19	-	Translation	mRNA	598	19	7	31.6259	42.7541	51.0578	9	0.415529
SPAC3C7.01c.1	SPAC3C7.01c	sac12	Other	mRNA	2238	151	12	43.2169	58.4237	46.78	13	0.329021
SPAC3C7.02c.1	SPAC3C7.02c	pil2	Other	mRNA	1152	32	16	22.8829	30.9348	60.235	4	0.0140899
SPAC3C7.03c.1	SPAC3C7.03c	rad55	Reproduction	mRNA	1419	70	10	19.0352	25.7331	46.286	30	0.302477
SPAC3C7.04.1	SPAC3C7.04	-	Other	mRNA	3060	165	1	32.1612	43.4779	53.1243	101	0.291007
SPAC3C7.05c.1	SPAC3C7.05c	mug191	Other	mRNA	1901	192	12	20.6052	27.8556	45.2886	21	0.488614
SPAC3C7.06c.1	SPAC3C7.06c	pit1	Reproduction	mRNA	3085	29	1	16.5558	22.3814	52.4567	21	0.332329
SPAC3C7.07c.1	SPAC3C7.07c	ate1	Other	mRNA	1508	405	116	29.7452	40.2117	64.9866	221	0.380312
SPAC3C7.08c.1	SPAC3C7.08c	elf1	Other	mRNA	3464	581	41	179.599	242.795	45.7108	49	0.51492
SPAC3C7.09.1	SPAC3C7.09	set8	Other	mRNA	1535	120	23	14.4371	19.5172	48.8108	83	0.352796
SPAC3C7.10.1	SPAC3C7.10	pex13	Other	mRNA	1468	495	22	26.6829	36.0718	43.8659	58	0.367529
SPAC3C7.11c.1	SPAC3C7.11c	cnx1	Other	mRNA	2187	1084	61	280.426	379.1	49.1425	89	0.682918
SPAC3C7.12.1	SPAC3C7.12	tip1	Reproduction	mRNA	2075	394	18	39.1525	52.9292	45.3277	234	0.370149
SPAC3C7.13c.1	SPAC3C7.13c	-	Other	mRNA	3731	100	1	15.4992	20.9529	52.6557	23	0.25852
SPAC3C7.14c.1	SPAC3C7.14c	obr1	Other	mRNA	957	18026	1673	1142.88	1545.02	34.6156	2472	0.519983
SPAC3F10.02c.1	SPAC3F10.02c	trk1	Other	mRNA	3099	175	3	39.7087	53.6811	53.476	15	0.296579
SPAC3F10.03.1	SPAC3F10.03	grs1	Translation	mRNA	2319	823	48	216.752	293.021	41.9623	373	0.411321
SPAC3F10.04.1	SPAC3F10.04	gsa1	Other	mRNA	3887	504	0	44.0165	59.5047	44.6413	195	0.350521
SPAC3F10.05c.1	SPAC3F10.05c	mug113	Other	mRNA	1431	174	23	75.2265	101.697	65.6632	22	0.258807
SPAC3F10.06c.1	SPAC3F10.06c	rit1	Other	mRNA	1362	21	7	34.0582	46.0423	66.4186	7	0.220612
SPAC3F10.07c.1	SPAC3F10.07c	erf4	Other	mRNA	519	1	0	3.1298	4.23109	50.73	1	0
SPAC3F10.08c.1	SPAC3F10.08c	faf1	Other	mRNA	1324	586	34	72.3674	97.8315	42.765	100	0.476045
SPAC3F10.09.1	SPAC3F10.09	his6	Other	mRNA	1893	1080	33	64.2465	86.8531	45.7049	158	0.625879
SPAC3F10.10c.1	SPAC3F10.10c	map3	Reproduction	mRNA	2888	45	0	6.00219	8.11419	66.555	16	0.533373
SPAC3F10.11c.1	SPAC3F10.11c	abc2	Other	mRNA	4700	329	1	41.7447	56.4336	47.4078	204	0.572828
SPAC3F10.12c.1	SPAC3F10.12c	-	Other	mRNA	1572	228	30	56.1531	75.9119	55.173	20	0.639779
SPAC3F10.13.1	SPAC3F10.13	ucp6	Other	mRNA	2681	116	5	35.9547	48.6062	47.5589	19	0.542943
SPAC3F10.15c.1	SPAC3F10.15c	spo12	Other	mRNA	3797	366	0	15.737	21.2744	45.3327	63	0.385411
SPAC3F10.16c.1	SPAC3F10.16c	-	Other	mRNA	2057	769	131	180.893	244.544	49.9166	313	0.619435
SPAC3F10.17.1	SPAC3F10.17	ltv1	Other	mRNA	1613	738	60	107.883	145.845	51.5696	285	0.431087
SPAC3F10.18c.1	SPAC3F10.18c	rpl4102	Translation	mRNA	249	21813	7668	1087.1	1469.63	35.549	4217	0.610899
SPAC3F10.19.1	SPAC3F10.19	spd2	Other	mRNA	1024	735	36	181.495	245.358	52.2789	522	0.412114
SPAC3G6.01.1	SPAC3G6.01	hrp3	Other	mRNA	4533	140	0	33.8019	45.6959	50.3493	54	0.669597
SPAC3G6.02.1	SPAC3G6.02	rpn15	Other	mRNA	653	3678	349	210.553	284.641	38.8022	1270	0.608566
SPAC3G6.03c.1	SPAC3G6.03c	-	Other	mRNA	1384	704	41	66.8324	90.3489	46.5954	445	0.458224
SPAC3G6.04.1	SPAC3G6.04	rnp24	Other	mRNA	1375	435	105	105.681	142.867	42.8374	321	0.399978
SPAC3G6.05.1	SPAC3G6.05	-	Other	mRNA	1605	309	10	89.7269	121.299	57.098	199	0.407323
SPAC3G6.06c.1	SPAC3G6.06c	rad2	Other	mRNA	1483	158	20	36.6151	49.499	52.0316	97	0.537294
SPAC3G6.07.1	SPAC3G6.07	-	Other	mRNA	708	10	4	2.42541	3.27884	34.112	5	0.538753
SPAC3G6.08.1	SPAC3G6.08	erv1	Other	mRNA	1036	139	10	25.3331	34.2472	49.8434	82	0.367475
SPAC3G6.09c.1	SPAC3G6.09c	tps2	Other	mRNA	2925	150	10	40.6905	55.0083	55.34	15	0.446365
SPAC3G6.10c.1	SPAC3G6.10c	vps51	Other	mRNA	854	67	15	19.4554	26.3013	48.21	5	0.103978
SPAC3G6.11.1	SPAC3G6.11	chl1	Other	mRNA	3608	75	0	9.91111	13.3985	40.0138	13	0.236856
SPAC3G6.13c.1	SPAC3G6.13c	rpl4101	Translation	mRNA	376	21581	3009	1254.93	1696.51	34.6002	13090	0.575382
SPAC3G9.01.1	SPAC3G9.01	nsk1	Other	mRNA	1861	96	7	27.9685	37.8098	41.1682	17	0.480243
SPAC3G9.02.1	SPAC3G9.02	oar2	Other	mRNA	739	407	322	33.5675	45.379	52.1801	81	0.462923
SPAC3G9.03.1	SPAC3G9.03	rpl2301	Translation	mRNA	580	34777	6902	1136.86	1536.88	37.5037	28300	0.491928
SPAC3G9.04.1	SPAC3G9.04	ssu72	Other	mRNA	977	388	19	40.9714	55.3881	51.7736	174	0.346897
SPAC3G9.05.1	SPAC3G9.05	spa2	Other	mRNA	2649	124	6	50.6591	68.4846	48.5996	27	0.225213
SPAC3G9.06.1	SPAC3G9.06	frs2	Translation	mRNA	1619	1052	171	291.635	394.253	43.9418	204	0.397184
SPAC3G9.07c.1	SPAC3G9.07c	hos2	Other	mRNA	1835	163	31	24.6342	33.3023	52.4846	96	0.441516
SPAC3G9.08.1	SPAC3G9.08	png1	Other	mRNA	1516	138	33	24.6135	33.2743	44.438	10	0.21285
SPAC3G9.09c.1	SPAC3G9.09c	tif211	Translation	mRNA	1138	2173	536	400.729	541.734	40.0374	1134	0.495227
SPAC3G9.10c.1	SPAC3G9.10c	rrp41	Other	mRNA	1060	1228	222	89.0994	120.451	42.7108	473	0.435586
SPAC3G9.11c.1	SPAC3G9.11c	pdc201	Other	mRNA	2493	13	0	4.93332	6.66922	45.7863	8	0.334892
SPAC3G9.12.1	SPAC3G9.12	peg1	Other	mRNA	5346	127	0	11.9021	16.0902	43.2378	37	0.307953
SPAC3G9.13c.1	SPAC3G9.13c	msw1	Translation	mRNA	6404	192	0	5.67811	7.67608	48.9173	59	0.486381
SPAC3G9.14.1	SPAC3G9.14	sak1	Other	mRNA	3539	228	3	75.8121	102.488	52.8062	24	0.378255
SPAC3G9.15c.1	SPAC3G9.15c	fcf2	Other	mRNA	693	1108	972	193.812	262.009	46.2499	766	0.445242
SPAC3G9.16c.1	SPAC3G9.16c	bet5	Other	mRNA	468	180	108	49.7822	67.2991	49.8158	112	0.316754
SPAC3G9.17.1	SPAC3G9.17	new8	Other	mRNA	399	477	323	32.2198	43.5571	51.2557	94	0.508762
SPAC3H1.01c.1	SPAC3H1.01c	orc3	Other	mRNA	2453	253	62	35.8059	48.405	46.1178	94	0.309753
SPAC3H1.02c.1	SPAC3H1.02c	sdd3	Other	mRNA	3464	126	2	22.7296	30.7275	49.7287	23	0.414994
SPAC3H1.03.1	SPAC3H1.03	mug151	Other	mRNA	944	611	35	23.0086	31.1047	46.8039	194	0.598429
SPAC3H1.04c.1	SPAC3H1.04c	mdm31	Other	mRNA	2248	483	18	64.2996	86.9248	54.6728	90	0.512133
SPAC3H1.05.1	SPAC3H1.05	ste24	Other	mRNA	2189	1480	24	138.956	187.85	45.1853	830	0.422988
SPAC3H1.06c.1	SPAC3H1.06c	-	Other	mRNA	4109	29	0	4.72124	6.38251	58.079	10	0.353725
SPAC3H1.07.1	SPAC3H1.07	aru1	Other	mRNA	1242	1871	304	313.103	423.275	43.4233	1221	0.41964
SPAC3H1.08c.1	SPAC3H1.08c	-	Other	mRNA	880	444	49	25.2357	34.1154	47.9971	69	0.452977
SPAC3H1.09c.1	SPAC3H1.09c	avt3	Other	mRNA	2548	205	3	95.3801	128.942	51.885	62	0.431147
SPAC3H1.10.1	SPAC3H1.10	pcs2	Other	mRNA	2265	465	6	36.5342	49.3895	51.7177	291	0.314848
SPAC3H1.11.1	SPAC3H1.11	hsr1	Other	mRNA	4086	110	1	16.4015	22.1728	45.1091	23	0.738184
SPAC3H1.12c.1	SPAC3H1.12c	snt2	Other	mRNA	4414	134	1	26.4332	35.7342	53.1071	24	0.236118
SPAC3H1.13.1	SPAC3H1.13	ppk13	Other	mRNA	1245	292	51	29.4679	39.8368	48.3367	193	0.557197
SPAC3H1.14.1	SPAC3H1.14	gid4	Other	mRNA	1183	383	49	30.2668	40.9169	47.9288	285	0.352999
SPAC3H5.04.1	SPAC3H5.04	aar2	Other	mRNA	2167	588	10	30.412	41.1132	46.5251	49	0.333939
SPAC3H5.05c.1	SPAC3H5.05c	rps1401	Translation	mRNA	640	6718	1862	462.691	625.499	40.0636	4648	0.52038
SPAC3H5.06c.1	SPAC3H5.06c	pol1	Reproduction	mRNA	5190	81	0	21.6001	29.2006	49.5603	35	0.646628
SPAC3H5.07.1	SPAC3H5.07	rpl702	Translation	mRNA	1108	9905	634	931.958	1259.89	41.1599	7134	0.472355
SPAC3H5.08c.1	SPAC3H5.08c	wdr44	Other	mRNA	3349	110	2	38.6777	52.2873	60.6907	82	0.298593
SPAC3H5.09c.1	SPAC3H5.09c	-	Other	mRNA	8519	93	0	19.1656	25.9095	43.852	55	0.421823
SPAC3H5.10.1	SPAC3H5.10	rpl3202	Translation	mRNA	692	26390	2428	1773.42	2397.44	39.1163	4384	0.492375
SPAC3H5.11.1	SPAC3H5.11	-	Other	mRNA	2292	212	4	27.1841	36.7495	44.6012	60	0.35502
SPAC3H5.12c.1	SPAC3H5.12c	rpl501	Translation	mRNA	973	18706	3744	2297.63	3106.1	39.2184	11600	0.444747
SPAC3H5.13.1	SPAC3H5.13	new4	Other	mRNA	441	457	404	17.4697	23.6168	52.3017	204	0.477209
SPAC3H8.02.1	SPAC3H8.02	csr102	Other	mRNA	2209	116	26	86.1294	116.436	63.8986	42	0.987698
SPAC3H8.03.1	SPAC3H8.03	img2	Translation	mRNA	1291	551	2	41.0181	55.4512	46.3038	294	0.468253
SPAC3H8.04.1	SPAC3H8.04	-	Other	mRNA	1681	171	12	24.4062	32.9941	52.1799	116	0.347924
SPAC3H8.05c.1	SPAC3H8.05c	mms1	Other	mRNA	3607	106	2	37.7383	51.0173	62.0945	20	0.430348
SPAC3H8.06.1	SPAC3H8.06	aur1	Other	mRNA	2333	189	4	69.2377	93.6006	51.7672	96	0.481302
SPAC3H8.07c.1	SPAC3H8.07c	pfd3	Other	mRNA	831	1494	94	69.1689	93.5075	37.1373	1163	0.602044
SPAC3H8.08c.1	SPAC3H8.08c	-	Other	mRNA	2146	113	19	34.7646	46.9973	47.0107	15	0.357842
SPAC3H8.09c.1	SPAC3H8.09c	nab3	Other	mRNA	3294	138	1	15.921	21.5232	54.5411	35	0.39414
SPAC3H8.10.1	SPAC3H8.10	spo20	Reproduction	mRNA	1504	1804	129	285.313	385.707	45.3303	1014	0.573539
SPAC458.02c.1	SPAC458.02c	-	Other	mRNA	1667	2023	151	271.544	367.093	39.2093	1204	0.405539
SPAC458.03.1	SPAC458.03	tel2	Other	mRNA	3512	147	2	22.3991	30.2808	58.1941	96	0.592859
SPAC458.04c.1	SPAC458.04c	dli1	Reproduction	mRNA	1315	56	4	4.11165	5.55843	57.608	44	0.414226
SPAC458.05.1	SPAC458.05	pik3	Reproduction	mRNA	2627	83	6	27.2244	36.8039	42.1753	34	0.655827
SPAC458.06.1	SPAC458.06	atg1803	Other	mRNA	1334	231	7	11.3591	15.356	60.1343	176	0.381128
SPAC458.07.1	SPAC458.07	tfa1	Other	mRNA	1468	340	109	49.0661	66.3311	57.0645	204	0.436589
SPAC4A8.02c.1	SPAC4A8.02c	-	Other	mRNA	2633	334	2	31.0666	41.9981	51.9434	161	0.361186
SPAC4A8.03c.1	SPAC4A8.03c	ptc4	Other	mRNA	2488	313	5	35.8431	48.4553	51.0577	44	0.529298
SPAC4A8.04.1	SPAC4A8.04	isp6	Reproduction	mRNA	2167	85	4	55.9731	75.6685	55.0578	67	0.313822
SPAC4A8.05c.1	SPAC4A8.05c	myp2	Other	mRNA	6448	64	0	14.0606	19.0082	52.2856	16	0.452454
SPAC4A8.06c.1	SPAC4A8.06c	-	Other	mRNA	2139	463	67	85.4656	115.539	43.4039	49	0.417249
SPAC4A8.07c.1	SPAC4A8.07c	lcb4	Other	mRNA	1697	373	26	83.1259	112.376	58.1213	198	0.327848
SPAC4A8.08c.1	SPAC4A8.08c	vrs2	Translation	mRNA	3274	211	3	21.0151	28.4098	45.3055	101	0.476684
SPAC4A8.09c.1	SPAC4A8.09c	cwf21	Other	mRNA	1730	488	32	39.0465	52.7859	41.1271	93	0.439871
SPAC4A8.10.1	SPAC4A8.10	rog1	Other	mRNA	2982	147	1	30.9792	41.88	51.9937	48	0.518691
SPAC4A8.11c.1	SPAC4A8.11c	fas2	Other	mRNA	5760	556	2	147.394	199.257	32.9304	73	0.555548
SPAC4A8.12c.1	SPAC4A8.12c	sds22	Other	mRNA	1427	554	34	44.2477	59.8172	44.5003	251	0.396653
SPAC4A8.13c.1	SPAC4A8.13c	pts1	Other	mRNA	1211	2308	385	182.538	246.768	42.4962	269	0.385009
SPAC4A8.14.1	SPAC4A8.14	-	Other	mRNA	1695	1410	84	139.943	189.185	46.8276	973	0.432889
SPAC4A8.15c.1	SPAC4A8.15c	cdc3	Reproduction	mRNA	454	2379	1742	510.566	690.22	37.4751	1492	0.457663
SPAC4A8.16c.1	SPAC4A8.16c	tif303	Translation	mRNA	2947	1362	49	281.88	381.066	44.4595	202	0.389294
SPAC4C5.01.1	SPAC4C5.01	pud1	Other	mRNA	1228	373	40	30.8962	41.7677	65.2238	39	0.367251
SPAC4C5.02c.1	SPAC4C5.02c	ryh1	Other	mRNA	2232	310	8	48.1883	65.1444	53.045	191	0.364518
SPAC4C5.03.1	SPAC4C5.03	-	Other	mRNA	1562	346	48	130.139	175.932	50.7115	196	0.326118
SPAC4C5.04.1	SPAC4C5.04	rad31	Other	mRNA	1273	408	38	38.9914	52.7113	45.965	297	0.546287
SPAC4D7.01c.1	SPAC4D7.01c	sec71	Other	mRNA	5647	96	0	21.8656	29.5595	40.2253	17	0.435804
SPAC4D7.02c.1	SPAC4D7.02c	pgc1	Other	mRNA	1513	205	17	27.1776	36.7406	53.7224	78	0.382998
SPAC4D7.03.1	SPAC4D7.03	pop2	Other	mRNA	2585	209	6	41.3116	55.848	49.3052	71	0.400212
SPAC4D7.04c.1	SPAC4D7.04c	rer2	Other	mRNA	1268	1459	327	123.054	166.353	46.6283	290	0.43405
SPAC4D7.05.1	SPAC4D7.05	sum1	Translation	mRNA	1213	3902	558	519.353	702.1	38.3848	1427	0.535142
SPAC4D7.06c.1	SPAC4D7.06c	met8	Other	mRNA	1140	577	59	59.8654	80.9304	40.1804	349	0.40396
SPAC4D7.07c.1	SPAC4D7.07c	csi2	Other	mRNA	2474	173	8	25.6346	34.6547	50.1642	24	0.493743
SPAC4D7.08c.1	SPAC4D7.08c	ade4	Other	mRNA	2177	959	62	237.84	321.53	50.0893	377	0.37054
SPAC4D7.09.1	SPAC4D7.09	tif223	Translation	mRNA	1657	762	92	122.552	165.675	44.2905	445	0.495361
SPAC4D7.10c.1	SPAC4D7.10c	spt20	Other	mRNA	1947	531	5	29.2837	39.5878	64.1659	330	0.48295
SPAC4D7.11.1	SPAC4D7.11	dsc4	Other	mRNA	1632	206	23	45.9555	62.1259	65.4386	112	0.336233
SPAC4D7.12c.1	SPAC4D7.12c	fet5	Other	mRNA	1113	882	80	95.719	129.4	47.3598	151	0.408868
SPAC4D7.13.1	SPAC4D7.13	usp104	Other	mRNA	2217	733	104	81.4434	110.101	46.1171	377	0.454955
SPAC4D7.14.1	SPAC4D7.14	new13	Other	mRNA	366	332	290	14.9629	20.228	43.4921	131	0.462715
SPAC4D7.15.1	SPAC4D7.15	new12	Other	mRNA	282	85	78	9.29855	12.5705	45.9624	21	0.374812
SPAC4F10.02.1	SPAC4F10.02	aap1	Other	mRNA	1596	307	92	44.3022	59.8909	54.2298	53	0.407507
SPAC4F10.03c.1	SPAC4F10.03c	trm7	Translation	mRNA	1233	458	50	59.7916	80.8306	50.5771	287	0.396929
SPAC4F10.04.1	SPAC4F10.04	ypa1	Other	mRNA	1412	438	45	39.4752	53.3654	49.7214	281	0.544096
SPAC4F10.05c.1	SPAC4F10.05c	lip2	Other	mRNA	1022	389	23	20.8665	28.2089	47.4339	109	0.427241
SPAC4F10.06.1	SPAC4F10.06	bud22	Other	mRNA	1556	1636	142	118.338	159.978	43.0926	1132	0.482996
SPAC4F10.07c.1	SPAC4F10.07c	atg13	Other	mRNA	2917	33	0	21.0414	28.4453	60.699	10	0.16025
SPAC4F10.08.1	SPAC4F10.08	mug126	Other	mRNA	2431	23	0	0.696825	0.942019	48.1621	19	0.430829
SPAC4F10.09c.1	SPAC4F10.09c	noc1	Other	mRNA	2925	504	36	155.59	210.338	47.521	68	0.360595
SPAC4F10.10c.1	SPAC4F10.10c	mnn9	Other	mRNA	2095	605	33	179.151	242.189	42.254	73	0.416903
SPAC4F10.11.1	SPAC4F10.11	spn1	Other	mRNA	2120	428	18	60.465	81.7409	52.7875	179	0.400385
SPAC4F10.12.1	SPAC4F10.12	fta1	Other	mRNA	1231	438	91	34.0444	46.0237	51.0716	334	0.455625
SPAC4F10.13c.1	SPAC4F10.13c	mpd2	Other	mRNA	3244	231	6	65.6027	88.6865	46.2942	33	0.417835
SPAC4F10.14c.1	SPAC4F10.14c	btf3	Other	mRNA	626	24906	2583	1638.82	2215.48	34.9407	18691	0.52097
SPAC4F10.15c.1	SPAC4F10.15c	wsp1	Other	mRNA	2070	122	11	33.1936	44.8735	43.9313	60	0.438765
SPAC4F10.16c.1	SPAC4F10.16c	-	Other	mRNA	6104	230	0	23.8173	32.1979	57.6552	25	0.3582
SPAC4F10.17.1	SPAC4F10.17	-	Other	mRNA	958	16	6	1.81669	2.45594	35.025	2	0.0510772
SPAC4F10.18.1	SPAC4F10.18	nup37	Other	mRNA	1523	453	42	72.983	98.6637	53.4513	265	0.356722
SPAC4F10.19c.1	SPAC4F10.19c	hit1	Other	mRNA	973	139	21	10.756	14.5407	49.3152	60	0.331462
SPAC4F10.20.1	SPAC4F10.20	grx1	Other	mRNA	502	2878	176	262.053	354.262	37.145	2230	0.45044
SPAC4F10.22.1	SPAC4F10.22	cmc4	Other	mRNA	213	114	112	11.4392	15.4643	32.0063	8	0.886229
SPAC4F8.01.1	SPAC4F8.01	did4	Other	mRNA	937	712	54	50.8683	68.7674	40.9769	112	0.493576
SPAC4F8.02c.1	SPAC4F8.02c	mrpl40	Translation	mRNA	1302	582	36	82.3768	111.363	38.7015	387	0.481922
SPAC4F8.03.1	SPAC4F8.03	sdo1	Other	mRNA	1119	1865	150	109.452	147.966	48.1959	1324	0.499309
SPAC4F8.04.1	SPAC4F8.04	-	Other	mRNA	1295	1221	418	191.591	259.007	43.4768	98	0.490158
SPAC4F8.05c.1	SPAC4F8.05c	mrpl28	Translation	mRNA	722	1218	181	92.2103	124.657	41.3741	523	0.639922
SPAC4F8.06.1	SPAC4F8.06	mrps12	Translation	mRNA	929	528	74	63.9455	86.4462	45.3065	37	0.423152
SPAC4F8.07c.1	SPAC4F8.07c	hxk2	Other	mRNA	3051	2223	4	339.507	458.97	52.2673	1339	0.473997
SPAC4F8.08.1	SPAC4F8.08	mug114	Other	mRNA	2048	29	0	1.21238	1.63899	45.8531	26	0.478966
SPAC4F8.10c.1	SPAC4F8.10c	stg1	Other	mRNA	890	1033	100	115.479	156.112	51.6191	614	0.399606
SPAC4F8.11.1	SPAC4F8.11	sea2	Other	mRNA	5299	74	0	11.18	15.114	56.5379	14	0.412088
SPAC4F8.12c.1	SPAC4F8.12c	spp42	Other	mRNA	7337	264	0	31.3051	42.3205	41.7125	208	0.471415
SPAC4F8.13c.1	SPAC4F8.13c	rng2	Other	mRNA	5048	28	0	26.6391	36.0127	43.84	17	0.433578
SPAC4F8.14c.1	SPAC4F8.14c	hcs1	Other	mRNA	1528	1152	305	238.34	322.205	42.3499	681	0.506776
SPAC4F8.15.1	SPAC4F8.15	itr1	Other	mRNA	2755	107	9	32.0578	43.338	48.8585	27	0.260588
SPAC4G8.02c.1	SPAC4G8.02c	sss1	Other	mRNA	400	5903	2127	321.683	434.874	34.9154	4619	0.527004
SPAC4G8.03c.1	SPAC4G8.03c	puf5	Other	mRNA	4800	131	0	22.6928	30.6777	45.7686	50	0.375353
SPAC4G8.04.1	SPAC4G8.04	-	Other	mRNA	2738	70	4	30.9177	41.7968	53.3594	36	0.321511
SPAC4G8.05.1	SPAC4G8.05	ppk14	Reproduction	mRNA	2165	188	11	60.6444	81.9835	51.952	45	0.627819
SPAC4G8.06c.1	SPAC4G8.06c	trm12	Other	mRNA	1378	631	203	99.8768	135.021	50.1125	64	0.473934
SPAC4G8.07c.1	SPAC4G8.07c	trm2	Other	mRNA	1633	115	44	44.3926	60.0132	49.7062	39	0.478002
SPAC4G8.08.1	SPAC4G8.08	-	Other	mRNA	1113	390	101	52.7904	71.3658	52.0326	189	0.457225
SPAC4G8.09.1	SPAC4G8.09	-	Translation	mRNA	2894	169	12	23.7665	32.1293	41.6465	17	0.447914
SPAC4G8.10.1	SPAC4G8.10	gos1	Other	mRNA	2072	299	4	18.3559	24.8148	61.6292	122	0.476823
SPAC4G8.11c.1	SPAC4G8.11c	atp10	Other	mRNA	2089	211	2	6.66498	9.0102	41.4427	33	0.4429
SPAC4G8.12c.1	SPAC4G8.12c	smp3	Other	mRNA	2616	105	1	19.8965	26.8976	67.5382	38	0.42723
SPAC4G8.13c.1	SPAC4G8.13c	prz1	Other	mRNA	3442	128	2	43.3025	58.5395	53.8253	19	0.727416
SPAC4G9.02.1	SPAC4G9.02	rnh201	Other	mRNA	1420	418	31	36.7525	49.6847	47.1638	273	0.362055
SPAC4G9.03.1	SPAC4G9.03	adk1	Other	mRNA	894	1864	332	376.942	509.578	44.6747	706	0.416343
SPAC4G9.04c.1	SPAC4G9.04c	pcf11	Other	mRNA	3472	156	0	36.2381	48.9893	44.3222	27	0.644788
SPAC4G9.05.1	SPAC4G9.05	mpf1	Other	mRNA	3088	19	0	0.691348	0.934614	37.69	3	0.225027
SPAC4G9.06c.1	SPAC4G9.06c	chz1	Other	mRNA	2796	603	6	53.6808	72.5696	40.0822	423	0.447367
SPAC4G9.07.1	SPAC4G9.07	mug133	Other	mRNA	2616	3	0	0.612065	0.827433	35	1	0
SPAC4G9.08c.1	SPAC4G9.08c	rpc2	Other	mRNA	3620	138	4	43.2694	58.4947	55.3621	19	0.46195
SPAC4G9.09c.1	SPAC4G9.09c	arg11	Other	mRNA	3004	1332	3	138.768	187.597	45.2055	123	0.446264
SPAC4G9.10.1	SPAC4G9.10	arg3	Other	mRNA	1752	358	22	40.0529	54.1464	39.346	95	0.383343
SPAC4G9.11c.1	SPAC4G9.11c	cmb1	Other	mRNA	758	744	169	81.6775	110.418	40.7344	107	0.377799
SPAC4G9.12.1	SPAC4G9.12	idn1	Other	mRNA	1200	630	66	81.1797	109.745	45.151	286	0.460579
SPAC4G9.13c.1	SPAC4G9.13c	vps26	Other	mRNA	2453	491	1	20.197	27.3037	50.6328	126	0.541491
SPAC4G9.14.1	SPAC4G9.14	sym1	Other	mRNA	1279	484	20	42.9633	58.0808	55.6548	364	0.417451
SPAC4G9.15.1	SPAC4G9.15	ifa38	Other	mRNA	1233	1762	159	151.672	205.041	37.9262	1082	0.442201
SPAC4G9.16c.1	SPAC4G9.16c	rpl901	Translation	mRNA	784	32056	3806	2436.88	3294.34	35.5568	4860	0.503805
SPAC4G9.17c.1	SPAC4G9.17c	mrp5	Translation	mRNA	1524	553	67	83.4262	112.782	49.7939	117	0.310982
SPAC4G9.19.1	SPAC4G9.19	-	Other	mRNA	1349	64	4	19.4036	26.2312	55.9558	24	0.345365
SPAC4G9.20c.1	SPAC4G9.20c	ymc1	Other	mRNA	1414	206	6	71.2896	96.3745	59.7671	133	0.390242
SPAC4G9.22.1	SPAC4G9.22	-	Other	mRNA	1113	62	5	56.8351	76.8338	61.3133	27	0.307726
SPAC4H3.01.1	SPAC4H3.01	-	Other	mRNA	2613	581	5	68.7454	92.935	46.5173	387	0.471393
SPAC4H3.02c.1	SPAC4H3.02c	swc3	Other	mRNA	1526	128	11	26.2009	35.4203	58.1044	27	0.262523
SPAC4H3.03c.1	SPAC4H3.03c	-	Other	mRNA	2922	45	1	9.41869	12.7329	39.1533	18	0.471187
SPAC4H3.04c.1	SPAC4H3.04c	-	Other	mRNA	1324	73	8	5.3982	7.29767	54.7473	62	0.471088
SPAC4H3.05.1	SPAC4H3.05	srs2	Other	mRNA	3254	123	3	12.3371	16.6782	46.0131	55	0.478737
SPAC4H3.06.1	SPAC4H3.06	-	Other	mRNA	2165	1194	0	18.0819	24.4444	45.9563	926	0.497249
SPAC4H3.07c.1	SPAC4H3.07c	rdl2	Other	mRNA	545	1002	822	106.276	143.671	41.8872	753	0.50101
SPAC4H3.08.1	SPAC4H3.08	-	Other	mRNA	1639	52	0	7.00829	9.47432	50.5091	34	0.461106
SPAC4H3.09.1	SPAC4H3.09	-	Other	mRNA	491	1181	877	189.706	256.459	40.509	939	0.485859
SPAC4H3.10c.1	SPAC4H3.10c	pyk1	Other	mRNA	1903	2471	350	1979.85	2676.5	47.9843	242	0.35589
SPAC4H3.11c.1	SPAC4H3.11c	ppc89	Other	mRNA	2964	209	5	43.6312	58.9838	47.4631	85	0.318603
SPAC4H3.13.1	SPAC4H3.13	pcc1	Other	mRNA	611	833	295	54.7659	74.0365	40.5704	420	0.511265
SPAC4H3.14c.1	SPAC4H3.14c	rng8	Other	mRNA	1339	547	49	53.6892	72.5809	48.5783	259	0.373672
SPAC4H3.16.1	SPAC4H3.16	-	Other	mRNA	2599	655	2	26.1963	35.414	45.1721	332	0.537127
SPAC4H3.17.1	SPAC4H3.17	-	Other	mRNA	261	9	6	0.622363	0.841355	41.8856	9	0.401888
SPAC513.01c.1	SPAC513.01c	eft201	Translation	mRNA	2632	770	161	1020.24	1379.23	43.8759	98	0.418725
SPAC513.02.1	SPAC513.02	-	Other	mRNA	1255	31	1	1.71959	2.32467	46.0331	26	0.399379
SPAC513.03.1	SPAC513.03	mfm2	Reproduction	mRNA	467	55	33	6.16156	8.32964	56.8583	36	0.390891
SPAC513.04.1	SPAC513.04	-	Other	mRNA	303	0	0	0	0	0	0	0
SPAC513.05.1	SPAC513.05	ams1	Other	mRNA	5799	127	0	10.3641	14.011	45.0033	24	0.360557
SPAC513.06c.1	SPAC513.06c	dhd1	Other	mRNA	5534	220	0	9.06153	12.25	51.1467	39	0.839106
SPAC513.07.1	SPAC513.07	-	Other	mRNA	1759	306	14	49.5502	66.9856	52.6391	185	0.373525
SPAC521.02.1	SPAC521.02	wss1	Other	mRNA	969	1276	97	70.3102	95.0504	36.3043	446	1.04031
SPAC521.03.1	SPAC521.03	-	Other	mRNA	1195	705	162	55.2265	74.6592	42.2519	120	0.41515
SPAC521.04c.1	SPAC521.04c	sst1	Other	mRNA	3459	65	0	27.0493	36.5672	52.26	6	0.412061
SPAC521.05.1	SPAC521.05	rps802	Translation	mRNA	839	16240	822	1857.75	2511.44	37.3616	9251	0.474588
SPAC56E4.02c.1	SPAC56E4.02c	alg13	Other	mRNA	1221	269	16	42.0203	56.8061	54.6522	59	0.40095
SPAC56E4.03.1	SPAC56E4.03	-	Other	mRNA	1989	694	37	185.304	250.507	47.6958	442	0.342716
SPAC56E4.04c.1	SPAC56E4.04c	cut6	Other	mRNA	7222	474	1	126.299	170.74	33.3594	47	0.614855
SPAC56E4.05.1	SPAC56E4.05	snd2	Other	mRNA	1033	913	55	86.3738	116.766	42.6254	609	0.444748
SPAC56E4.06c.1	SPAC56E4.06c	ggt2	Other	mRNA	2412	130	4	39.7818	53.7799	46.6222	9	0.360145
SPAC56E4.07.1	SPAC56E4.07	-	Other	mRNA	3986	383	0	21.3889	28.915	45.6965	187	0.402363
SPAC56F8.02.1	SPAC56F8.02	-	Other	mRNA	5047	70	1	23.1547	31.3021	54.5771	45	0.259983
SPAC56F8.03.1	SPAC56F8.03	tif52	Translation	mRNA	3571	564	6	146.789	198.44	42.477	376	0.418788
SPAC56F8.04c.1	SPAC56F8.04c	ppt1	Other	mRNA	1083	182	120	37.5826	50.8069	46.8059	17	0.346265
SPAC56F8.05c.1	SPAC56F8.05c	mug64	Other	mRNA	1175	1651	295	159.218	215.242	42.2697	1206	0.546856
SPAC56F8.06c.1	SPAC56F8.06c	alg10	Other	mRNA	1809	24	0	29.4138	39.7637	48.9744	9	0.481402
SPAC56F8.07.1	SPAC56F8.07	-	Other	mRNA	552	176	5	53.9774	72.9705	41.8919	114	0.387924
SPAC56F8.08.1	SPAC56F8.08	mud1	Other	mRNA	1082	717	432	104.767	141.631	42.229	481	0.437014
SPAC56F8.09.1	SPAC56F8.09	rrp8	Other	mRNA	1423	847	309	93.2449	126.055	50.6512	544	0.390802
SPAC56F8.10.1	SPAC56F8.10	met9	Other	mRNA	2194	575	87	119.612	161.7	54.4276	400	0.360124
SPAC56F8.11.1	SPAC56F8.11	spc3	Other	mRNA	1237	1526	64	75.2998	101.796	45.4105	614	0.476637
SPAC56F8.12.1	SPAC56F8.12	-	Other	mRNA	1253	5	0	0.796349	1.07656	43.0375	4	0.117346
SPAC56F8.13.1	SPAC56F8.13	-	Other	mRNA	1582	27	0	5.63262	7.61459	23.438	5	0.75039
SPAC56F8.14c.1	SPAC56F8.14c	mug115	Other	mRNA	4048	516	0	32.0161	43.2817	42.2914	221	0.35398
SPAC56F8.15.1	SPAC56F8.15	-	Other	mRNA	2208	0	0	2.31212	3.12569	0	0	0
SPAC56F8.16.1	SPAC56F8.16	esc1	Reproduction	mRNA	3233	63	0	29.0837	39.3175	48.8186	43	0.440282
SPAC57A10.02.1	SPAC57A10.02	cdr2	Other	mRNA	3220	81	2	42.7567	57.8016	62.6785	47	0.346804
SPAC57A10.03.1	SPAC57A10.03	cyp1	Other	mRNA	972	471	223	50.851	68.744	59.7287	182	0.440885
SPAC57A10.04.1	SPAC57A10.04	mug10	Other	mRNA	1283	39	6	5.9867	8.09325	108.442	30	0.357344
SPAC57A10.05c.1	SPAC57A10.05c	pof1	Other	mRNA	3519	35	0	19.552	26.4318	58.9386	7	0.261883
SPAC57A10.06.1	SPAC57A10.06	mug15	Other	mRNA	402	14	9	2.8285	3.82377	34.8956	9	0.52529
SPAC57A10.07.1	SPAC57A10.07	-	Other	mRNA	1232	373	53	68.09	92.049	51.1697	229	0.349698
SPAC57A10.08c.1	SPAC57A10.08c	-	Other	mRNA	1333	227	50	17.1123	23.1337	45.6508	36	0.394423
SPAC57A10.09c.1	SPAC57A10.09c	nhp6	Other	mRNA	875	1117	604	325.802	440.442	44.8666	773	0.583402
SPAC57A10.10c.1	SPAC57A10.10c	sla1	Other	mRNA	1110	5704	781	466.655	630.858	40.698	2480	0.418389
SPAC57A10.11c.1	SPAC57A10.11c	mia40	Other	mRNA	1688	1057	29	61.2849	82.8494	40.5297	197	0.660682
SPAC57A10.12c.1	SPAC57A10.12c	ura3	Other	mRNA	1707	1120	286	451.231	610.007	40.5588	76	0.428418
SPAC57A10.14.1	SPAC57A10.14	sgf11	Other	mRNA	750	263	44	41.3672	55.9232	47.0161	150	0.512211
SPAC57A7.04c.1	SPAC57A7.04c	pabp	Other	mRNA	4616	1476	3	177.965	240.587	48.1837	572	0.374996
SPAC57A7.05.1	SPAC57A7.05	-	Other	mRNA	7435	31	0	2.89948	3.91973	51.1463	24	0.673061
SPAC57A7.06.1	SPAC57A7.06	utp14	Other	mRNA	3147	455	8	97.7761	132.181	44.5075	44	0.489429
SPAC57A7.07c.1	SPAC57A7.07c	-	Other	mRNA	1392	207	16	24.889	33.6467	47.5004	134	0.46145
SPAC57A7.08.1	SPAC57A7.08	pzh1	Other	mRNA	2298	221	9	92.7301	125.359	45.2891	23	0.39846
SPAC57A7.09.1	SPAC57A7.09	-	Other	mRNA	1541	143	36	47.9013	64.7564	68.9223	13	0.564573
SPAC57A7.10c.1	SPAC57A7.10c	sec21	Other	mRNA	3134	498	10	108.97	147.313	44.028	158	0.437237
SPAC57A7.11.1	SPAC57A7.11	mip1	Reproduction	mRNA	4238	100	0	34.3424	46.4266	43.35	9	0.555223
SPAC57A7.12.1	SPAC57A7.12	ssz1	Translation	mRNA	1893	1225	116	308.116	416.533	42.8576	436	0.431752
SPAC57A7.13.1	SPAC57A7.13	rbm10	Other	mRNA	1989	381	22	27.0786	36.6068	51.0983	66	0.378408
SPAC57A7.15c.1	SPAC57A7.15c	-	Other	mRNA	876	379	26	24.2648	32.803	48.1127	139	0.495126
SPAC589.02c.1	SPAC589.02c	med13	Other	mRNA	3678	35	0	8.11363	10.9686	72.3095	21	0.237218
SPAC589.03c.1	SPAC589.03c	noc12	Other	mRNA	921	636	261	46.4357	62.7751	43.481	97	0.451267
SPAC589.04.1	SPAC589.04	mtx1	Other	mRNA	1230	345	27	62.5787	84.5984	49.4023	111	0.388064
SPAC589.05c.1	SPAC589.05c	qtr3	Other	mRNA	1407	298	15	26.0255	35.1831	46.4162	168	0.516888
SPAC589.06c.1	SPAC589.06c	snd302	Other	mRNA	995	2576	189	508.556	687.503	48.6232	1580	0.368001
SPAC589.07c.1	SPAC589.07c	atg1801	Other	mRNA	1364	99	44	17.0807	23.0909	66.593	63	0.27908
SPAC589.08c.1	SPAC589.08c	dam1	Reproduction	mRNA	744	154	15	24.5776	33.2258	55.2611	27	0.408101
SPAC589.09.1	SPAC589.09	csr101	Other	mRNA	2437	249	3	27.0712	36.5968	49.8274	72	0.52477
SPAC589.10c.1	SPAC589.10c	ubi5	Translation	mRNA	733	47250	1888	1788.73	2418.14	31.0682	22022	0.550064
SPAC589.11.1	SPAC589.11	pth4	Translation	mRNA	549	46	40	5.11445	6.91408	54.7612	33	0.583066
SPAC589.12.1	SPAC589.12	cwh43	Other	mRNA	3012	335	27	76.4802	103.391	46.0415	203	0.477094
SPAC5D6.01.1	SPAC5D6.01	rps2202	Translation	mRNA	668	10312	5106	478.382	646.712	47.2743	5391	0.567627
SPAC5D6.02c.1	SPAC5D6.02c	mug165	Other	mRNA	2033	34	1	9.88477	13.3629	51.4	31	0.348195
SPAC5D6.04.1	SPAC5D6.04	-	Other	mRNA	2339	79	2	44.6842	60.4074	88.9133	24	1.0554
SPAC5D6.05.1	SPAC5D6.05	med18	Other	mRNA	896	863	185	73.5523	99.4333	47.1493	205	0.4717
SPAC5D6.06c.1	SPAC5D6.06c	alg14	Other	mRNA	1078	384	97	33.4087	45.1642	48.5578	134	0.462187
SPAC5D6.07c.1	SPAC5D6.07c	pxa1	Other	mRNA	1850	57	3	18.1628	24.5538	48.9676	41	0.282219
SPAC5D6.08c.1	SPAC5D6.08c	mes1	Reproduction	mRNA	1201	143	10	49.5213	66.9464	46.758	81	0.350324
SPAC5D6.09c.1	SPAC5D6.09c	mug86	Other	mRNA	3400	21	0	7.52123	10.1677	56.8862	13	0.336357
SPAC5D6.10c.1	SPAC5D6.10c	mug116	Other	mRNA	1161	0	0	0.179886	0.243182	0	0	0
SPAC5D6.12.1	SPAC5D6.12	mtf2	Translation	mRNA	3383	188	1	29.9754	40.523	48.9779	53	0.371482
SPAC5D6.13.1	SPAC5D6.13	gpp74	Other	mRNA	2155	566	25	107.584	145.44	53.5324	46	0.335327
SPAC5H10.01.1	SPAC5H10.01	dgc1	Other	mRNA	1082	112	6	7.93525	10.7274	44.4608	37	0.415628
SPAC5H10.02c.1	SPAC5H10.02c	hsp3102	Other	mRNA	2294	36	0	1.40607	1.90083	44.2372	25	0.530523
SPAC5H10.03.1	SPAC5H10.03	-	Other	mRNA	3464	3089	1	117.085	158.283	43.1634	2021	0.464876
SPAC5H10.04.1	SPAC5H10.04	-	Other	mRNA	2665	87	0	14.9158	20.1642	51.1713	40	0.432289
SPAC5H10.05c.1	SPAC5H10.05c	-	Other	mRNA	2514	255	0	16.3747	22.1366	50.2397	31	0.486078
SPAC5H10.06c.1	SPAC5H10.06c	adh4	Other	mRNA	1878	225	19	125.318	169.414	51.1383	23	0.221097
SPAC5H10.07.1	SPAC5H10.07	-	Other	mRNA	696	37	8	4.43433	5.99465	37.1733	3	0.0189482
SPAC5H10.08c.1	SPAC5H10.08c	pan6	Other	mRNA	1066	285	193	71.5313	96.7012	51.838	15	0.249083
SPAC5H10.09c.1	SPAC5H10.09c	ecm31	Other	mRNA	846	54	12	16.5948	22.434	40.8357	7	0.183603
SPAC5H10.10.1	SPAC5H10.10	-	Other	mRNA	1880	763	42	117.223	158.471	42.9929	167	0.574393
SPAC5H10.11.1	SPAC5H10.11	gmh1	Other	mRNA	1766	35	1	12.9166	17.4616	58.3725	20	0.516335
SPAC5H10.12c.1	SPAC5H10.12c	otg1	Other	mRNA	2013	334	20	80.9013	109.368	46.1609	33	0.337352
SPAC5H10.13c.1	SPAC5H10.13c	gmh2	Other	mRNA	2372	417	7	68.2657	92.2864	49.6825	64	0.34558
SPAC607.02c.1	SPAC607.02c	-	Other	mRNA	1164	582	23	41.7056	56.3807	44.2207	415	0.588205
SPAC607.03c.1	SPAC607.03c	snu13	Other	mRNA	505	16184	9685	1331.98	1800.67	38.4365	11509	0.473191
SPAC607.04.1	SPAC607.04	arg82	Other	mRNA	1071	632	140	53.9506	72.9342	47.1286	333	0.37425
SPAC607.05.1	SPAC607.05	rpn9	Other	mRNA	1361	1810	189	162.573	219.778	42.068	1088	0.533688
SPAC607.06c.1	SPAC607.06c	-	Other	mRNA	1951	218	26	23.5977	31.9011	47.5221	114	0.422334
SPAC607.07c.1	SPAC607.07c	-	Other	mRNA	950	771	73	140.038	189.313	49.0482	82	0.352726
SPAC607.08c.1	SPAC607.08c	mil1	Other	mRNA	1740	38	13	21.965	29.6938	53.03	3	0.155177
SPAC607.09c.1	SPAC607.09c	btn1	Other	mRNA	1270	38	14	13.9597	18.8717	41.4571	17	0.264371
SPAC607.10.1	SPAC607.10	spo3	Reproduction	mRNA	4379	66	0	7.35	9.93626	51.9961	51	0.282918
SPAC630.03.1	SPAC630.03	arp3	Other	mRNA	1596	938	86	123.456	166.897	50.591	317	0.402645
SPAC630.04c.1	SPAC630.04c	-	Other	mRNA	3102	163	0	14.1087	19.0731	52.7416	38	0.234625
SPAC630.05.1	SPAC630.05	gyp7	Other	mRNA	2798	80	0	31.5402	42.6383	49.3988	42	0.317328
SPAC630.06c.1	SPAC630.06c	-	Other	mRNA	3303	795	0	17.0298	23.0221	42.4008	547	0.479052
SPAC630.07c.1	SPAC630.07c	-	Other	mRNA	1904	99	8	18.8543	25.4885	47.0067	9	0.199987
SPAC630.08c.1	SPAC630.08c	erg25	Other	mRNA	1629	817	197	433.449	585.968	49.6449	96	0.360216
SPAC630.09c.1	SPAC630.09c	mug58	Other	mRNA	1467	247	69	48.0714	64.9864	50.4754	28	0.389187
SPAC630.10.1	SPAC630.10	bmt2	Other	mRNA	1239	699	52	42.852	57.9304	42.3743	551	0.429063
SPAC630.11.1	SPAC630.11	vps55	Other	mRNA	913	1484	152	91.0672	123.111	53.8397	1059	0.477328
SPAC630.12.1	SPAC630.12	-	Other	mRNA	1911	196	6	51.9962	70.2923	46.7584	55	0.400125
SPAC630.13c.1	SPAC630.13c	tsc2	Other	mRNA	4427	163	2	24.3637	32.9366	48.2912	33	0.555713
SPAC630.14c.1	SPAC630.14c	tup12	Other	mRNA	2872	221	4	77.744	105.1	54.3932	113	0.457977
SPAC630.15.1	SPAC630.15	mug177	Other	mRNA	2098	43	1	2.78728	3.76805	51.255	8	0.210596
SPAC631.01c.1	SPAC631.01c	acp2	Other	mRNA	1209	449	51	156.583	211.68	42.4764	311	0.439196
SPAC631.02.1	SPAC631.02	bdf2	Other	mRNA	4534	318	0	54.6045	73.8183	47.7013	156	0.457454
SPAC637.03.1	SPAC637.03	-	Other	mRNA	1443	127	6	61.35	82.9373	41.0551	92	0.628106
SPAC637.04.1	SPAC637.04	ypp1	Other	mRNA	3366	252	3	44.8111	60.5788	49.336	142	0.37738
SPAC637.05c.1	SPAC637.05c	vma2	Other	mRNA	1936	1075	76	213.833	289.075	46.7231	589	0.418598
SPAC637.06.1	SPAC637.06	gmh5	Other	mRNA	1434	863	451	159.75	215.962	45.2569	230	0.370004
SPAC637.07.1	SPAC637.07	moe1	Translation	mRNA	2002	1584	90	325.233	439.673	44.2654	1036	0.409849
SPAC637.08.1	SPAC637.08	nbp35	Other	mRNA	1271	498	70	56.7625	76.7356	41.138	342	0.375231
SPAC637.09.1	SPAC637.09	rex1	Other	mRNA	2207	429	19	73.5586	99.4418	44.7128	210	0.48602
SPAC637.10c.1	SPAC637.10c	rpn10	Other	mRNA	1028	1672	283	125.846	170.127	38.8284	1254	0.548934
SPAC637.11.1	SPAC637.11	rpm2	Other	mRNA	2626	228	3	30.5839	41.3455	53.7025	79	0.258801
SPAC637.12c.1	SPAC637.12c	mst1	Other	mRNA	3818	334	0	19.3093	26.1038	40.1235	37	0.514188
SPAC637.13c.1	SPAC637.13c	slm1	Other	mRNA	1860	347	56	96.2269	130.086	38.3321	33	0.519244
SPAC644.04.1	SPAC644.04	pct1	Other	mRNA	2558	385	3	44.5599	60.2392	54.656	68	0.349777
SPAC644.05c.1	SPAC644.05c	dut1	Other	mRNA	692	923	83	117.736	159.165	45.4041	92	0.42447
SPAC644.06c.1	SPAC644.06c	cdr1	Other	mRNA	3049	150	3	51.9359	70.2107	50.9073	33	0.431899
SPAC644.07.1	SPAC644.07	bcs1	Other	mRNA	1751	115	21	32.0579	43.3382	47.6151	73	0.370069
SPAC644.08.1	SPAC644.08	utr4	Other	mRNA	1157	551	27	44.6054	60.3008	47.1349	419	0.498932
SPAC644.09.1	SPAC644.09	-	Other	mRNA	955	762	162	63.6382	86.0308	46.6211	559	0.536909
SPAC644.10.1	SPAC644.10	med11	Other	mRNA	765	610	149	30.4853	41.2122	46.6756	207	0.463518
SPAC644.11c.1	SPAC644.11c	pkp1	Other	mRNA	2249	341	9	33.7915	45.6818	48.4599	80	0.422594
SPAC644.12.1	SPAC644.12	cdc5	Other	mRNA	2411	252	39	50.0198	67.6203	46.1236	11	0.445482
SPAC644.13c.1	SPAC644.13c	-	Other	mRNA	3269	467	0	32.3979	43.7978	43.0996	50	0.462383
SPAC644.14c.1	SPAC644.14c	rad51	Reproduction	mRNA	2174	369	5	45.9408	62.1061	44.6111	38	0.367422
SPAC644.15.1	SPAC644.15	rpp101	Translation	mRNA	687	15127	700	902.809	1220.48	35.52	7532	0.527635
SPAC644.16.1	SPAC644.16	rna15	Other	mRNA	1379	530	82	69.5147	93.975	45.0722	97	0.419637
SPAC644.17c.1	SPAC644.17c	mrpl9	Translation	mRNA	2427	737	2	31.3036	42.3185	52.0823	52	1.11274
SPAC644.18c.1	SPAC644.18c	bet3	Other	mRNA	1274	1166	265	86.6827	117.184	47.6652	841	0.409595
SPAC652.01.1	SPAC652.01	-	Other	mRNA	1595	188	22	40.2418	54.4018	54.0499	79	0.379202
SPAC664.01c.1	SPAC664.01c	swi6	Reproduction	mRNA	1668	854	50	89.6212	121.156	46.7641	287	0.472321
SPAC664.02c.1	SPAC664.02c	arp8	Other	mRNA	2289	148	9	36.5363	49.3925	52.7127	91	0.401869
SPAC664.03.1	SPAC664.03	paf1	Other	mRNA	1583	950	97	80.0529	108.221	44.805	260	0.444444
SPAC664.04c.1	SPAC664.04c	rps1602	Translation	mRNA	509	16725	4395	1592	2152.18	38.0357	2507	0.529052
SPAC664.05.1	SPAC664.05	rpl13	Translation	mRNA	908	13488	943	2656.54	3591.3	42.5144	6584	0.465253
SPAC664.06.1	SPAC664.06	rlp7	Other	mRNA	921	7372	3129	674.917	912.402	49.7386	4156	0.424872
SPAC664.07c.1	SPAC664.07c	rad9	Other	mRNA	1722	125	11	15.3084	20.6951	55.9163	57	0.427344
SPAC664.08c.1	SPAC664.08c	bfr2	Other	mRNA	1634	591	94	128.041	173.095	51.1402	349	0.349507
SPAC664.09.1	SPAC664.09	ggt1	Other	mRNA	2782	115	0	37.402	50.5627	44.2755	69	0.528338
SPAC664.10.1	SPAC664.10	klp2	Reproduction	mRNA	2959	99	5	25.7304	34.7843	55.5769	74	0.311803
SPAC664.11.1	SPAC664.11	ssc1	Other	mRNA	2332	1772	205	397.415	537.254	38.5309	1099	0.490406
SPAC664.12c.1	SPAC664.12c	-	Other	mRNA	2557	264	0	21.2268	28.696	41.6597	98	0.484318
SPAC664.13.1	SPAC664.13	-	Other	mRNA	354	83	82	6.09629	8.24141	44.6456	9	0.524497
SPAC664.14.1	SPAC664.14	amt2	Other	mRNA	2186	279	70	78.4902	106.109	47.3974	167	0.34018
SPAC664.15.1	SPAC664.15	caf4	Other	mRNA	2927	181	4	36.2468	49.001	47.0398	93	0.445581
SPAC683.02c.1	SPAC683.02c	-	Other	mRNA	1221	871	79	77.3318	104.543	42.9261	101	0.510295
SPAC683.03.1	SPAC683.03	-	Other	mRNA	380	0	0	0.244266	0.330216	0	0	0
SPAC688.02c.1	SPAC688.02c	mis14	Other	mRNA	908	415	74	31.5366	42.6335	46.9583	260	0.48085
SPAC688.03c.1	SPAC688.03c	-	Other	mRNA	744	111	69	13.6611	18.4681	46.1988	26	0.346722
SPAC688.04c.1	SPAC688.04c	gst3	Other	mRNA	1290	122	9	23.2052	31.3705	55.1587	24	0.313514
SPAC688.06c.1	SPAC688.06c	slx4	Reproduction	mRNA	2199	102	2	9.06471	12.2543	41.9135	52	0.29722
SPAC688.07c.1	SPAC688.07c	rng10	Other	mRNA	3387	236	6	64.2375	86.8408	57.5092	39	0.852018
SPAC688.08.1	SPAC688.08	srb8	Other	mRNA	3446	82	3	33.7506	45.6265	49.1226	58	0.404911
SPAC688.09.1	SPAC688.09	rim2	Other	mRNA	1879	384	27	41.3965	55.9627	48.8459	225	0.36118
SPAC688.10.1	SPAC688.10	rev3	Other	mRNA	4786	39	1	9.15894	12.3817	56.11	30	0.549854
SPAC688.11.1	SPAC688.11	end4	Other	mRNA	3705	247	0	63.2335	85.4836	44.4132	136	0.443537
SPAC688.12c.1	SPAC688.12c	-	Other	mRNA	1106	1637	35	95.8632	129.595	37.729	230	0.451489
SPAC688.13.1	SPAC688.13	scn3	Other	mRNA	1723	83	9	18.3029	24.7432	50.1973	45	0.267166
SPAC688.14.1	SPAC688.14	set13	Translation	mRNA	1796	238	13	26.4612	35.7722	47.0613	129	0.366451
SPAC688.16.1	SPAC688.16	-	Other	mRNA	589	1286	249	43.9284	59.3856	48.5492	341	0.527959
SPAC694.02.1	SPAC694.02	-	Other	mRNA	5465	418	2	68.7665	92.9635	45.0281	287	0.505367
SPAC694.03.1	SPAC694.03	-	Other	mRNA	1979	178	2	7.69208	10.3987	40.6805	21	0.459666
SPAC694.04c.1	SPAC694.04c	-	Other	mRNA	1218	1419	266	126.505	171.018	43.092	900	0.47846
SPAC694.05c.1	SPAC694.05c	rps2502	Translation	mRNA	373	18884	3894	3157.47	4268.49	34.393	6510	0.468392
SPAC694.06c.1	SPAC694.06c	mrc1	Other	mRNA	3251	108	3	25.8106	34.8926	43.7653	15	0.392952
SPAC6B12.02c.1	SPAC6B12.02c	mus7	Other	mRNA	5956	113	0	11.0221	14.9005	45.0424	54	0.4788
SPAC6B12.03c.1	SPAC6B12.03c	bit2	Other	mRNA	1221	5	0	0.779209	1.05339	50.982	5	0.10284
SPAC6B12.04c.1	SPAC6B12.04c	-	Other	mRNA	2290	346	4	42.4382	57.3711	53.4261	31	0.369818
SPAC6B12.05c.1	SPAC6B12.05c	ies2	Other	mRNA	1285	498	30	79.6021	107.612	48.272	129	0.437618
SPAC6B12.06c.1	SPAC6B12.06c	rrg9	Other	mRNA	1451	484	4	8.85989	11.9774	54.3017	121	0.512945
SPAC6B12.07c.1	SPAC6B12.07c	-	Other	mRNA	2453	350	10	129.242	174.718	53.0559	69	0.459658
SPAC6B12.08.1	SPAC6B12.08	epr1	Other	mRNA	2077	51	1	8.17825	11.056	43.6592	12	0.305422
SPAC6B12.09.1	SPAC6B12.09	trm10	Other	mRNA	1189	860	146	64.5999	87.3309	40.7812	648	0.449299
SPAC6B12.10c.1	SPAC6B12.10c	spp1	Other	mRNA	1683	188	13	39.1993	52.9925	43.9634	82	0.476703
SPAC6B12.11.1	SPAC6B12.11	drc1	Other	mRNA	1968	282	14	30.0324	40.5999	48.3823	70	0.423059
SPAC6B12.12.1	SPAC6B12.12	tom70	Other	mRNA	2292	1432	130	233.085	315.101	47.9151	871	0.412422
SPAC6B12.13.1	SPAC6B12.13	-	Other	mRNA	963	988	84	47.5671	64.3047	34.6443	194	0.473327
SPAC6B12.14c.1	SPAC6B12.14c	-	Other	mRNA	1971	477	3	46.8461	63.3299	36.8598	42	0.38426
SPAC6B12.15.1	SPAC6B12.15	cpc2	Translation	mRNA	1141	18533	2088	3548.92	4797.68	41.128	8548	0.454246
SPAC6B12.16.1	SPAC6B12.16	meu26	Other	mRNA	1135	7	0	0.163561	0.221114	62.9033	6	0.501109
SPAC6B12.18.1	SPAC6B12.18	gon7	Other	mRNA	641	1132	32	21.3952	28.9235	56.803	416	0.487239
SPAC6B12.19.1	SPAC6B12.19	rsa3	Other	mRNA	243	122	121	11.9369	16.1371	66.8186	7	0.574121
SPAC6C3.02c.1	SPAC6C3.02c	mix17	Other	mRNA	808	1468	595	297.992	402.847	50.9244	231	0.440783
SPAC6C3.03c.1	SPAC6C3.03c	-	Other	mRNA	1937	33	0	1.1381	1.53856	52.3123	26	0.528345
SPAC6C3.04.1	SPAC6C3.04	cit1	Other	mRNA	1739	573	45	172.712	233.484	47.097	385	0.374129
SPAC6C3.05.1	SPAC6C3.05	meu43	Other	mRNA	1408	52	2	2.42271	3.27519	60.685	30	0.557125
SPAC6C3.06c.1	SPAC6C3.06c	neo1	Other	mRNA	4595	186	2	27.0888	36.6206	66.5607	40	0.783687
SPAC6C3.07.1	SPAC6C3.07	mug68	Other	mRNA	1735	9	0	0.86936	1.17526	48.5325	4	0.488673
SPAC6C3.08.1	SPAC6C3.08	nas6	Other	mRNA	1072	540	95	26.9068	36.3746	43.5322	230	0.436416
SPAC6C3.09.1	SPAC6C3.09	rpp40	Other	mRNA	1219	659	137	71.0054	95.9902	45.5035	434	0.454191
SPAC6F12.02.1	SPAC6F12.02	rst2	Reproduction	mRNA	3754	53	0	33.9115	45.8441	41.8882	22	0.376823
SPAC6F12.03c.1	SPAC6F12.03c	fsv1	Other	mRNA	1276	405	69	34.4805	46.6132	52.6538	40	0.458471
SPAC6F12.04.1	SPAC6F12.04	tvp15	Other	mRNA	636	2306	1105	280.98	379.85	43.2	1092	0.41181
SPAC6F12.05c.1	SPAC6F12.05c	tnr3	Other	mRNA	3492	215	0	12.513	16.916	43.3978	36	0.379762
SPAC6F12.06.1	SPAC6F12.06	rdi1	Other	mRNA	2195	962	5	53.3245	72.0879	43.5528	477	0.404514
SPAC6F12.07.1	SPAC6F12.07	tom20	Other	mRNA	859	2937	197	205.173	277.368	42.7388	2055	0.493583
SPAC6F12.08c.1	SPAC6F12.08c	exo84	Other	mRNA	2517	268	4	27.5752	37.2782	65.3341	156	0.299943
SPAC6F12.09.1	SPAC6F12.09	rdp1	Reproduction	mRNA	4391	197	0	11.1719	15.103	42.5468	28	0.367531
SPAC6F12.10c.1	SPAC6F12.10c	ade3	Other	mRNA	4319	397	5	115.58	156.25	36.6086	44	0.509555
SPAC6F12.11c.1	SPAC6F12.11c	sfc1	Other	mRNA	2215	164	4	22.0947	29.8693	55.5722	27	0.405626
SPAC6F12.12.1	SPAC6F12.12	par2	Other	mRNA	2722	147	4	45.8563	61.9919	38.1489	28	0.505618
SPAC6F12.13c.1	SPAC6F12.13c	fps1	Other	mRNA	1373	1903	143	205.399	277.674	43.7505	1194	0.440162
SPAC6F12.14.1	SPAC6F12.14	cut23	Other	mRNA	1899	233	31	23.6451	31.9652	56.53	18	0.373489
SPAC6F12.15c.1	SPAC6F12.15c	cut9	Other	mRNA	2692	111	4	15.6282	21.1273	56.0897	30	0.401507
SPAC6F12.16c.1	SPAC6F12.16c	mtr4	Other	mRNA	3628	396	5	83.8663	113.377	43.3902	49	0.439055
SPAC6F12.17.1	SPAC6F12.17	rna14	Other	mRNA	2502	312	12	61.556	83.2159	59.0438	185	0.759911
SPAC6F6.01.1	SPAC6F6.01	cch1	Other	mRNA	6455	110	0	13.3084	17.9913	37.4083	77	0.493585
SPAC6F6.02c.1	SPAC6F6.02c	pof5	Other	mRNA	1595	216	13	20.0045	27.0435	56.8911	102	0.337484
SPAC6F6.03c.1	SPAC6F6.03c	nog2	Other	mRNA	1872	1297	84	249.555	337.367	51.2414	140	0.519734
SPAC6F6.04c.1	SPAC6F6.04c	-	Other	mRNA	2777	121	1	9.72665	13.1492	60.1343	37	0.216222
SPAC6F6.05.1	SPAC6F6.05	ost2	Other	mRNA	902	3255	190	212.912	287.83	38.8029	1558	0.468692
SPAC6F6.06c.1	SPAC6F6.06c	rax2	Other	mRNA	4312	146	0	31.5036	42.5888	53.708	5	0.21816
SPAC6F6.07c.1	SPAC6F6.07c	rps13	Translation	mRNA	632	26237	7297	3881.48	5247.26	39.0942	9866	0.499233
SPAC6F6.08c.1	SPAC6F6.08c	cdc16	Other	mRNA	1176	85	33	25.8888	34.9984	47.6508	24	0.354584
SPAC6F6.09.1	SPAC6F6.09	eaf6	Other	mRNA	870	665	60	38.6221	52.2121	48.2327	410	0.395253
SPAC6F6.10c.1	SPAC6F6.10c	arc2	Other	mRNA	1297	758	75	139.893	189.118	45.6863	446	0.394755
SPAC6F6.11c.1	SPAC6F6.11c	-	Other	mRNA	1459	304	17	34.609	46.787	56.3562	231	0.377632
SPAC6F6.12.1	SPAC6F6.12	atg24	Other	mRNA	1723	471	37	68.9423	93.2012	62.8573	338	0.4522
SPAC6F6.13c.1	SPAC6F6.13c	-	Other	mRNA	2607	81	17	36.3789	49.1796	39.2375	4	0.456714
SPAC6F6.15.1	SPAC6F6.15	ypt5	Other	mRNA	1157	1052	46	95.4483	129.034	54.8207	360	0.394838
SPAC6F6.16c.1	SPAC6F6.16c	tpz1	Other	mRNA	3158	231	0	23.6608	31.9864	55.764	149	0.441411
SPAC6F6.17.1	SPAC6F6.17	rif1	Other	mRNA	4422	290	2	37.0434	50.0779	52.485	54	1.07014
SPAC6F6.19.1	SPAC6F6.19	-	Other	mRNA	369	129	110	9.49591	12.8373	57.7287	23	0.513468
SPAC6G10.02c.1	SPAC6G10.02c	tea3	Other	mRNA	3959	78	0	34.506	46.6477	46.5088	17	0.196212
SPAC6G10.03c.1	SPAC6G10.03c	cld1	Other	mRNA	2219	122	9	43.315	58.5564	51.5393	15	0.295936
SPAC6G10.04c.1	SPAC6G10.04c	pre5	Other	mRNA	1078	2613	602	171.026	231.205	41.574	1897	0.484183
SPAC6G10.05c.1	SPAC6G10.05c	trs120	Other	mRNA	3810	130	1	35.3012	47.7227	46.2569	35	0.505835
SPAC6G10.06.1	SPAC6G10.06	tda3	Reproduction	mRNA	1131	3	0	0.738628	0.998531	40.46	1	0
SPAC6G10.07.1	SPAC6G10.07	cbc1	Other	mRNA	2853	485	9	91.4708	123.657	42.4929	186	0.458142
SPAC6G10.08.1	SPAC6G10.08	idp1	Other	mRNA	1642	763	205	169.842	229.605	41.9831	454	0.432166
SPAC6G10.09.1	SPAC6G10.09	gls1	Other	mRNA	3652	668	5	77.6346	104.952	41.1444	348	0.454067
SPAC6G10.10c.1	SPAC6G10.10c	-	Other	mRNA	1325	125	16	15.7445	21.2846	52.3884	38	0.457458
SPAC6G10.11c.1	SPAC6G10.11c	ubi3	Translation	mRNA	528	102243	53155	4972.34	6721.96	38.69	44985	0.448419
SPAC6G10.12c.1	SPAC6G10.12c	ace2	Other	mRNA	1946	61	4	37.1331	50.1993	47.5167	3	0.527655
SPAC6G9.01c.1	SPAC6G9.01c	-	Other	mRNA	833	929	43	53.9598	72.9468	47.2609	192	0.415873
SPAC6G9.02c.1	SPAC6G9.02c	nop9	Other	mRNA	2262	1134	65	153.655	207.722	44.7918	108	0.396738
SPAC6G9.03c.1	SPAC6G9.03c	mug183	Other	mRNA	1501	250	18	29.2655	39.5632	50.1334	152	0.317849
SPAC6G9.04.1	SPAC6G9.04	spo7	Reproduction	mRNA	5093	127	0	8.05554	10.8901	59.5256	104	0.62803
SPAC6G9.05.1	SPAC6G9.05	pcd1	Other	mRNA	1181	206	8	51.0672	69.0364	55.3042	125	0.407684
SPAC6G9.06c.1	SPAC6G9.06c	pcp1	Other	mRNA	3920	80	0	19.6297	26.5369	51.1143	14	0.36918
SPAC6G9.07c.1	SPAC6G9.07c	arc4	Other	mRNA	691	3025	782	202.231	273.391	38.5626	2305	0.516014
SPAC6G9.08.1	SPAC6G9.08	ubp6	Other	mRNA	2659	423	2	57.4415	77.6535	46.8824	63	0.398851
SPAC6G9.09c.1	SPAC6G9.09c	rpl2401	Translation	mRNA	539	6988	3998	1796.4	2428.51	40.5237	1884	0.457405
SPAC6G9.10c.1	SPAC6G9.10c	sen1	Other	mRNA	5662	138	1	23.3405	31.5534	49.2081	32	0.399146
SPAC6G9.11.1	SPAC6G9.11	syb1	Other	mRNA	2146	2951	7	167.627	226.61	49.4174	1748	0.444179
SPAC6G9.12.1	SPAC6G9.12	cfr1	Reproduction	mRNA	2177	97	9	105.527	142.659	51.3454	35	0.33137
SPAC6G9.13c.1	SPAC6G9.13c	bqt1	Reproduction	mRNA	473	83	46	4.80785	6.4996	47.6395	56	0.461037
SPAC6G9.14.1	SPAC6G9.14	puf4	Other	mRNA	4276	191	0	47.3113	63.9589	60.1989	38	0.418977
SPAC6G9.15c.1	SPAC6G9.15c	ebp1	Other	mRNA	2095	229	10	21.8096	29.4838	50.4097	62	0.3367
SPAC6G9.16c.1	SPAC6G9.16c	xrc4	Reproduction	mRNA	1156	230	24	14.8947	20.1357	46.8774	176	0.532145
SPAC732.01.1	SPAC732.01	vma11	Other	mRNA	762	833	526	148.855	201.232	58.9027	235	0.460072
SPAC732.02c.1	SPAC732.02c	-	Other	mRNA	1937	475	27	67.064	90.6619	48.2108	76	0.517557
SPAC750.01.1	SPAC750.01	-	Other	mRNA	1053	769	419	112.941	152.682	47.4003	460	0.368392
SPAC750.02c.1	SPAC750.02c	-	Other	mRNA	1713	0	0	0.365757	0.494456	0	0	0
SPAC750.03c.1	SPAC750.03c	-	Other	mRNA	438	0	0	0	0	0	0	0
SPAC750.04c.1	SPAC750.04c	ftm3	Other	mRNA	441	0	0	0.210478	0.28454	0	0	0
SPAC750.05c.1	SPAC750.05c	ftm4	Other	mRNA	1457	0	0	100.259	135.537	0	0	0
SPAC750.06c.1	SPAC750.06c	-	Other	mRNA	843	2	1	12.4972	16.8947	0	0	0
SPAC750.07c.1	SPAC750.07c	-	Other	mRNA	372	0	0	0	0	0	0	0
SPAC750.08c.1	SPAC750.08c	-	Other	mRNA	687	0	0	1.38488	1.87218	0	0	0
SPAC767.01c.1	SPAC767.01c	vps1	Other	mRNA	2789	313	9	76.8211	103.852	51.8101	95	0.347739
SPAC7D4.02c.1	SPAC7D4.02c	sfp47	Other	mRNA	1653	460	58	45.7366	61.8301	50.98	236	0.422282
SPAC7D4.03c.1	SPAC7D4.03c	ahk1	Other	mRNA	3400	147	4	106.389	143.825	56.9371	83	0.369235
SPAC7D4.04.1	SPAC7D4.04	atg11	Other	mRNA	3281	129	1	47.8674	64.7106	39.7	6	0.459405
SPAC7D4.05.1	SPAC7D4.05	-	Other	mRNA	1504	512	8	24.7481	33.4563	43.9959	341	0.493956
[truncated: 5,007 more rows]

## Sheet: Isoforms_dRNA_Stringtie
Transcript	Transcript_length_nt	Gene	Ref_gene	Gene_name	Isoform_type	TPM	Counts_dRNA	TPM_per_gene	Counts_per_gene	TPM_RiboSeq	Counts_RiboSeq_intron_retention	AA_length	IsoformFraction_StringTie	Isoform_fraction_counts	Splicing	Average_polyA_length
STRG.9.1	1615	STRG.9	SPAC212.04c	-	Reference	9.81111	48	14.8155	70	9.9395	0	288	0.66222	0.685714	CTGT-AGAC	52.9681
STRG.9.2	1571	STRG.9	-	-	IntronInclusion	4.23226	19	14.8155	70	9.9395	0	226	0.285665	0.271429	CTGT-AGAC/GTGT-AGTG	61.7079
STRG.9.3	1569	STRG.9	-	-	IntronInclusion	0.772097	3	14.8155	70	9.9395	0	186	0.0521142	0.0428571	CTGT-AGAC/GTGT-AGGA	45.865
STRG.21.1	1323	STRG.21	-	-	IntronInclusion	8.46124	2	20.2254	113	132.835	0	171	0.418347	0.0176991	TGGT-AGTC	70.575
STRG.21.2	1250	STRG.21	SPAC977.11	fex1	Reference	11.7642	111	20.2254	113	132.835	0	311	0.581653	0.982301	AGAC	51.3784
STRG.54.1	996	STRG.54	SPAC13G6.05c	trs33	Reference	88.0627	299	101.327	301	284.907	0	253	0.869096	0.993355	AGGT-AGAC/GGGT-AGGG/CTGT-AGTA	53.1072
STRG.54.2	811	STRG.54	-	-	IntronRetention	13.2641	2	101.327	301	284.907	0	65	0.130904	0.00664452	GGGT-AGGG/CTGT-AGTA	5.9
STRG.78.1	2537	STRG.78	SPAC1639.01c	elo1	Reference	44.1345	276	73.1372	477	492.553	0	365	0.603448	0.578616	TGGT-AGGT/TCGT-AGCT	46.8984
STRG.78.2	2548	STRG.78	-	-	IntronInclusion	29.0027	201	73.1372	477	492.553	0	326	0.396552	0.421384	TGGT-AGGT/TCGT-AGCT/AGGT-AGGT	47.9875
STRG.87.1	923	STRG.87	SPAC18B11.09c	-	Reference	17.0399	34	23.7822	52	128.015	0	207	0.716496	0.653846	CCGT-AGGT/ATGT-AGGT/ACGT-AGAT	57.2016
STRG.87.2	971	STRG.87	-	-	IntronRetention	6.74235	18	23.7822	52	128.015	0	164	0.283504	0.346154	CCGT-AGGT/ATGT-AGGT	68.2687
STRG.90.1	748	STRG.90	SPAC18B11.07c	rhp6	Reference	348.238	1325	369.249	1438	892.768	0	151	0.9431	0.921419	AGGT-AGAG/TGGT-AGGA/TGGT-AGTT/AGGT-AGCT	43.0323
STRG.90.2	796	STRG.90	-	-	IntronRetention	21.0102	113	369.249	1438	892.768	0	122	0.0568999	0.0785814	AGGT-AGAG/TGGT-AGGA/TGGT-AGTT	76.7119
STRG.92.1	1817	STRG.92	SPAC18B11.05	gpi18	Reference	34.7411	17	51.1269	47	93.5829	0	464	0.679507	0.361702	TTGT-AGTC	40.7
STRG.92.2	1751	STRG.92	-	-	IntronRetention	16.3858	30	51.1269	47	93.5829	1	28	0.320493	0.638298	AATT	56.1375
STRG.93.1	1353	STRG.93	SPAC18B11.04	ncs1	Reference	88.6049	324	98.693	387	336.285	0	190	0.897783	0.837209	GTGT-AGTT/AGGT-AGGG/AGGT-AGCG	52.6439
STRG.93.2	1392	STRG.93	-	-	IntronRetention	10.0881	63	98.693	387	336.285	0	30	0.102217	0.162791	AGGT-AGGG/AGGT-AGCG	76.8897
STRG.117.1	913	STRG.117	SPAC630.11	vps55	Reference	3.48316	64	266.418	932	462.218	0	128	0.013074	0.0686695	AAGT-AGAA/CGGT-AGGT/TGGT-AGTC/AGGT-AGAA/TGGT-AGCT	46.8461
STRG.117.2	871	STRG.117	-	-	IntronRetention	238.632	764	266.418	932	462.218	0	17	0.895706	0.819742	AAGT-AGAA/TGGT-AGTC/AGGT-AGAA/TGGT-AGCT	50.8953
STRG.117.3	974	STRG.117	-	-	IntronRetention	24.3027	104	266.418	932	462.218	0	17	0.0912201	0.111588	AAGT-AGAA/TGGT-AGTC/TGGT-AGCT	68.0872
STRG.131.1	2575	STRG.131	SPAC31A2.09c	apm4	Reference	111.777	96	133.394	99	116.444	0	446	0.837947	0.969697	CGGT-AGGG/AAGT-AGGA	51.2965
STRG.131.2	2527	STRG.131	-	-	IntronRetention	21.6169	3	133.394	99	116.444	1	22	0.162053	0.030303	AAGT-AGGA	49.6167
STRG.137.1	1848	STRG.137	SPAC31A2.10	-	Reference	56.7038	171	66.4818	203	147.721	0	460	0.852922	0.842365	AAGT-AGAC/AGGT-AGGC/GTGT-AGTG/AGGT-AGAC	44.245
STRG.137.2	1936	STRG.137	-	-	IntronRetention	9.77802	32	66.4818	203	147.721	2	86	0.147078	0.157635	AAGT-AGAC/GTGT-AGTG/AGGT-AGAC	68.33
STRG.144.2	1708	STRG.144	SPAC13C5.02	dre4	Reference	19.4313	43	38.2	58	78.145	0	411	0.508674	0.741379	AGGT-AGCA/AAGT-AGAA	40.2175
STRG.144.3	2907	STRG.144	-	-	IntronRetention	12.6801	15	38.2	58	78.145	0	22	0.33194	0.258621	AAGT-AGAA	40.84
STRG.154.1	632	STRG.154	-	-	IntronRetention	67.2025	58	147.735	1327	0	6	14	0.454886	0.0437076	GGGT-AGAT	59.5894
STRG.154.2	932	STRG.154	SPAC227.10	pfd2	Reference	80.5323	1269	147.735	1327	0	0	114	0.545114	0.956292	GAGT-AGTT/AAGT-AGAC/GGGT-AGAT	40.8552
STRG.155.1	3096	STRG.155	SPAC227.11c	yos9	Reference	59.6655	94	100.639	94	311.315	0	310	0.592866	1	ATGT-AGGC/AGGT-AGAA	47.3069
STRG.155.2	1354	STRG.155	-	-	IntronInclusion	40.9737	0	100.639	94	311.315	0	7	0.407134	0	ATGT-AGGC/AGGT-AGAA	NA
STRG.170.1	2067	STRG.170	SPAC24H6.01c	gup1	Reference	23.7191	71	26.245	83	158.719	0	583	0.903759	0.855422	TCGT-AGCA/TGGT-AGGA/ACGT-AGAC/AGGT-AGAT/AGGT-AGGT	54.9956
STRG.170.2	2098	STRG.170	-	-	IntronRetention	2.52584	12	26.245	83	158.719	0	231	0.0962408	0.144578	TCGT-AGCA/ACGT-AGAC/AGGT-AGAT/AGGT-AGGT	63.258
STRG.211.1	3294	STRG.211	SPAC3H8.09c	nab3	Reference	10.2547	31	12.0149	38	14.4977	0	738	0.853499	0.815789	AGGT-AGAA/TGGT-AGAA	52.449
STRG.211.2	3253	STRG.211	-	-	IntronRetention	1.76019	7	12.0149	38	14.4977	0	471	0.146501	0.184211	TGGT-AGAA	66.97
STRG.228.1	2971	STRG.228	SPAC1F3.09	mug161	Reference	8.47563	8	46.3918	242	0	0	561	0.182697	0.0330579	GTGT-AGGC/GGGT-AGTT/ACGT-AGCC/GGGT-AGCG	43.278
STRG.228.2	3051	STRG.228	-	-	IntronRetention	28.062	182	46.3918	242	0	1	357	0.604892	0.752066	GTGT-AGGC/GGGT-AGTT	49.1789
STRG.228.3	3751	STRG.228	-	-	IntronRetention	9.85414	52	46.3918	242	0	0	298	0.212412	0.214876	GGGT-AGTT/GGGT-AGCG	45.0782
STRG.235.1	921	STRG.235	SPAC1D4.06c	csk1	Reference	56.1323	194	65.8996	211	245.578	0	306	0.851785	0.919431	AAGT-AGAT/CTGT-AGGA	43.3877
STRG.235.2	1366	STRG.235	-	-	IntronRetention	9.76731	17	65.8996	211	245.578	1	252	0.148215	0.0805687	AAGT-AGAT	NA
STRG.237.1	944	STRG.237	SPAC1D4.09c	rtf2	Reference	112.416	302	127.846	304	297.135	0	240	0.879306	0.993421	CGGT-AGGA/AAGT-AGTG/AGGT-AGGC	47.6257
STRG.237.2	941	STRG.237	-	-	IntronRetention	15.4303	2	127.846	304	297.135	0	12	0.120694	0.00657895	AAGT-AGTG/AGGT-AGGC	NA
STRG.300.1	955	STRG.300	SPAC2G11.15c	tgs1	Reference	63.4738	250	67.0571	255	94.4162	0	239	0.946564	0.980392	GAGT-AGAA/AGGT-AGTA/GGGT-AGTC	45.2271
STRG.300.2	794	STRG.300	-	-	IntronRetention	3.58328	5	67.0571	255	94.4162	0	59	0.0534362	0.0196078	AGGT-AGTA/GGGT-AGTC	54.45
STRG.317.1	786	STRG.317	SPAC222.18	-	Reference	86.338	428	114.184	441	234.602	0	111	0.756128	0.970522	AAGT-AGAT/CGGT-AGGT	52.2295
STRG.317.2	480	STRG.317	-	-	IntronRetention	27.8464	13	114.184	441	234.602	2	40	0.243872	0.0294785	CGGT-AGGT	58.0367
STRG.326.1	4270	STRG.326	-	-	IntronInclusion	1.41669	3	24.771	144	1006.19	0	945	0.0571916	0.0208333	CTGT-ACAA	51.025
STRG.326.2	3676	STRG.326	SPAC821.09	eng1	Reference	23.3543	141	24.771	144	1006.19	0	1016	0.942808	0.979167	AAGC	56.8513
STRG.349.1	1826	STRG.349	SPAC1687.15	gsk3	Reference	45.4894	128	48.5889	136	412.391	0	387	0.936211	0.941176	AAGT-AGTT/AGGT-AGAA	48.8025
STRG.349.2	2055	STRG.349	-	-	IntronRetention	3.09943	8	48.5889	136	412.391	1	20	0.0637889	0.0588235	AGGT-AGAA	57.2067
STRG.353.1	1251	STRG.353	-	-	IntronRetention	108.06	107	333.74	1473	1529.27	0	26	0.323786	0.0726409	AGGT-AGAC/AGGT-AGCG/AGGT-AGGC	55.1424
STRG.353.2	1338	STRG.353	-	-	IntronRetention	79.2498	66	333.74	1473	1529.27	0	26	0.23746	0.0448065	AGGT-AGGC	61.0173
STRG.353.3	872	STRG.353	SPAC1687.21	-	Reference	115.798	1300	333.74	1473	1529.27	0	209	0.34697	0.882553	TAGT-AGCA/AGGT-AGAC/AGGT-AGCG/AGGT-AGGC	36.4465
STRG.384.1	1990	STRG.384	SPAC1A6.05c	ptl3	Reference	52.3196	208	57.0941	233	115.686	0	483	0.916374	0.892704	AGGT-AGGA/GTGT-AGTG	47.798
STRG.384.2	1959	STRG.384	-	-	IntronRetention	4.77457	25	57.0941	233	115.686	0	289	0.0836262	0.107296	AGGT-AGGA	51.1292
STRG.389.1	488	STRG.389	SPAC30D11.12	rpl3802	Reference	3678.7	35	5656.26	211	19456.4	0	74	0.650378	0.165877	TGGT-AGCC/TGGT-AGCT	36.17
STRG.389.2	537	STRG.389	-	-	IntronRetention	1977.55	176	5656.26	211	19456.4	2	6	0.349622	0.834123	TGGT-AGCT	63.3375
STRG.392.1	2119	STRG.392	SPAC30D11.09	cwf19	Reference	30.024	113	41.1521	156	117.31	0	639	0.729586	0.724359	GAGT-AGAA/GGGT-AGAA	38.2494
STRG.392.2	2089	STRG.392	-	-	IntronRetention	11.1281	43	41.1521	156	117.31	0	566	0.270414	0.275641	GAGT-AGAA	120.25
STRG.414.1	1237	STRG.414	SPAC56F8.11	spc3	Reference	186.362	879	216.188	1027	278.835	0	185	0.862037	0.855891	TAGT-AGCA/ATGT-AGGA	41.8456
STRG.414.2	1428	STRG.414	-	-	IntronRetention	29.8259	148	216.188	1027	278.835	0	51	0.137963	0.144109	ATGT-AGGA	61.6748
STRG.450.1	3914	STRG.450	-	-	IntronInclusion	24.8918	2	62.9731	153	329.131	0	427	0.395278	0.0130719	TGGT-AGTT/GGGT-AGTG	NA
STRG.450.2	2651	STRG.450	SPAC1420.01c	-	Reference	38.0812	151	62.9731	153	329.131	0	580	0.604722	0.986928	TGGT-AGTT	61.8927
STRG.464.1	1194	STRG.464	SPAC1565.06c	spg1	Reference	65.1038	214	70.2438	237	229.885	0	198	0.926826	0.902954	TGGT-AGGA/AGGT-AGAC/AGGT-AGGC/AGGT-AGAT	52.264
STRG.464.2	1223	STRG.464	-	-	IntronRetention	5.14001	23	70.2438	237	229.885	0	53	0.0731739	0.0970464	AGGT-AGAC/AGGT-AGGC/AGGT-AGAT	82.5733
STRG.478.1	1373	STRG.478	SPAC6F12.13c	fps1	Reference	165.938	1562	493.097	1562	4626.77	0	347	0.336522	1	ATGT-AGAG	43.7224
STRG.478.2	669	STRG.478	-	-	IntronInclusion	327.159	0	493.097	1562	4626.77	0	198	0.663478	0	ATGT-AGAG	NA
STRG.491.1	972	STRG.491	SPAC57A10.03	cyp1	Reference	80.4068	231	89.9186	285	188.77	0	155	0.894218	0.810526	TGGT-AGGG/AAGT-AGAC/TTGT-AGTT/GGGT-AGGG/AGGT-AGTT	52.4903
STRG.491.2	1263	STRG.491	-	-	IntronRetention	9.51174	54	89.9186	285	188.77	0	69	0.105782	0.189474	TGGT-AGGG/AAGT-AGAC/TTGT-AGTT/AGGT-AGTT	65.6183
STRG.497.1	2586	STRG.497	-	-	IntronRetention	6.06724	35	30.4347	100	75.4096	0	317	0.199353	0.35	AGGT-AGGT	52.1043
STRG.497.2	2579	STRG.497	-	-	IntronRetention	5.95385	17	30.4347	100	75.4096	0	355	0.195627	0.17	TTGT-AGGA	38.51
STRG.497.3	1333	STRG.497	SPAC57A10.08c	-	Reference	18.4136	48	30.4347	100	75.4096	0	364	0.60502	0.48	TTGT-AGGA/AGGT-AGGT	40.3783
STRG.513.1	990	STRG.513	SPAC3A12.02	-	Reference	63.4462	179	78.2332	230	155.725	0	286	0.810988	0.778261	TGGT-AGGT/TGGT-AGAT	45.2227
STRG.513.2	1098	STRG.513	-	-	IntronRetention	14.787	51	78.2332	230	155.725	0	58	0.189012	0.221739	TGGT-AGAT	56.3843
STRG.544.1	1078	STRG.544	SPAC5D6.06c	alg14	Reference	76.2621	328	93.0034	328	224.099	0	210	0.819993	1	AGGT-AGTT	47.5493
STRG.544.2	736	STRG.544	-	-	IntronInclusion	16.7412	0	93.0034	328	224.099	0	196	0.180007	0	AGGT-AGTT	NA
STRG.549.1	2074	STRG.549	-	-	IntronRetention	2.41147	5	47.314	108	44.663	0	372	0.0509673	0.0462963	ATGT-AGAT/ATGT-AGTG	49.535
STRG.549.2	1989	STRG.549	SPAC57A7.13	rbm10	Reference	17.8281	34	47.314	108	44.663	0	565	0.376803	0.314815	ATGT-AGAT/ATGT-AGTG/AGGT-AGGT	50.19
STRG.549.3	2022	STRG.549	-	-	IntronRetention	15.4537	38	47.314	108	44.663	0	87	0.326619	0.351852	ATGT-AGTG/AGGT-AGGT	NA
STRG.549.4	2064	STRG.549	-	-	IntronRetention	11.6208	31	47.314	108	44.663	0	87	0.245611	0.287037	ATGT-AGTG	64.6175
STRG.573.2	1103	STRG.573	-	-	IntronRetention	35.6364	171	80.5061	282	43.2658	11	55	0.442655	0.606383	AGGT-AGTT/AGGT-AGAA	55.3896
STRG.573.3	1057	STRG.573	SPAC23H4.16c	not11	Reference	29.6378	111	80.5061	282	43.2658	0	328	0.368143	0.393617	ATGT-AGCT/AGGT-AGTT/AGGT-AGAA	49.6938
STRG.581.1	1129	STRG.581	SPAC23H4.08	iwr1	Reference	40.4156	119	45.5614	137	171.406	0	277	0.887056	0.868613	ATGT-AGAT/TTGT-AGAT/GGGT-AGAC	54.6665
STRG.581.2	1218	STRG.581	-	-	IntronRetention	5.14587	18	45.5614	137	171.406	0	61	0.112944	0.131387	ATGT-AGAT/GGGT-AGAC	78.96
STRG.585.1	1514	STRG.585	-	-	IntronRetention	46.615	144	82.666	265	63.4926	0	61	0.563896	0.543396	AGGT-AGTA	83.5175
STRG.585.2	1463	STRG.585	SPAC23H4.04	slm3	Reference	36.051	121	82.666	265	63.4926	0	415	0.436104	0.456604	AGGT-AGTA/AGGT-AGGG	59.3955
STRG.601.1	1119	STRG.601	SPAC343.03	apc11	Reference	15.2512	42	23.9102	64	66.9286	0	94	0.637852	0.65625	GAGT-AGGA/AGGT-AGTT	63.73
STRG.601.2	1140	STRG.601	-	-	IntronRetention	8.65903	22	23.9102	64	66.9286	0	13	0.362148	0.34375	AGGT-AGTT	50.3167
STRG.627.1	1250	STRG.627	SPAC824.09c	-	Reference	113.95	414	121.231	448	556.24	0	320	0.939943	0.924107	AGGT-AGAT/TGGT-AGTA/TTGT-AGGT/AGGT-AGTA	46.117
STRG.627.2	1319	STRG.627	-	-	IntronRetention	7.28081	34	121.231	448	556.24	0	69	0.0600572	0.0758929	AGGT-AGAT/TTGT-AGGT/AGGT-AGTA	60.5026
STRG.633.1	2348	STRG.633	-	-	IntronInclusion	1075.39	8	2437.88	6151	10280.6	0	200	0.441117	0.0013006	AGGT-AGGC/ATGT-AGTT	47.83
STRG.633.2	921	STRG.633	SPAC664.06	rlp7	Reference	1362.49	6143	2437.88	6151	10280.6	0	249	0.558883	0.998699	AGGT-AGGC	49.7212
STRG.644.1	1773	STRG.644	SPAC17A5.02c	dbr1	Reference	68.2346	213	72.4843	236	95.5632	0	478	0.941371	0.902542	CTGT-AGGC/AGGT-AGGA/ACGT-AGGT/ACGT-AGCT	44.5646
STRG.644.2	1952	STRG.644	-	-	IntronRetention	4.24968	23	72.4843	236	95.5632	0	103	0.058629	0.0974576	AGGT-AGGA/ACGT-AGGT/ACGT-AGCT	56.186
STRG.655.1	4208	STRG.655	SPAC17A5.14	exo2	Reference	10.4412	5	15.6424	8	217.081	0	1328	0.667498	0.625	AGGT-AGTT/GAGT-AGAT	70.188
STRG.655.2	4197	STRG.655	-	-	IntronRetention	5.20111	3	15.6424	8	217.081	1	22	0.332502	0.375	GAGT-AGAT	50.6
STRG.692.1	868	STRG.692	SPAPB1A10.10c	ypt71	Reference	91.785	613	157.154	622	621.353	0	208	0.584043	0.985531	AGGT-AGTT/AGGT-AGCT	50.8111
STRG.692.2	922	STRG.692	-	-	IntronRetention	65.3694	9	157.154	622	621.353	0	226	0.415957	0.0144695	AGGT-AGTT	54.5175
STRG.698.1	1526	STRG.698	-	-	IntronRetention	3.04207	13	36.7329	118	81.3562	4	48	0.082816	0.110169	ACGT-AGGT	58.0438
STRG.698.2	1002	STRG.698	SPAPB1A10.15	arv1	Reference	33.6908	105	36.7329	118	81.3562	0	266	0.917184	0.889831	GCGT-AGAA/ACGT-AGGT	50.5779
STRG.708.2	3801	STRG.708	-	-	IntronRetention	45.2125	8	187.733	1539	2339.73	1	18	0.240835	0.00519818	ATGT-AGTA	51.1625
STRG.708.3	1010	STRG.708	SPAC110.03	cdc42	Reference	1.86295	1531	187.733	1539	2339.73	0	192	0.0099234	0.994802	AGGT-AGAC/ATGT-AGTA	48.31
STRG.760.1	762	STRG.760	SPAC732.01	vma11	Reference	129.359	493	205.155	590	1776.34	0	162	0.630545	0.835593	TGGT-AGTC/AGGT-AGGT/AGGT-AGTC/GCGT-AGGT/AGGT-AGCG	53.7587
STRG.760.2	1179	STRG.760	-	-	IntronRetention	75.7956	97	205.155	590	1776.34	3	20	0.369455	0.164407	TGGT-AGTC/AGGT-AGTC/GCGT-AGGT/AGGT-AGCG	75.5889
STRG.762.1	1508	STRG.762	SPAC3C7.07c	ate1	Reference	47.4668	125	63.1966	177	110.75	0	391	0.751098	0.706215	AAGT-AGGA/AGGT-AGAC/AGGT-AGAC/GGGT-AGGT/CCGT-AGGG/GAGT-AGCA	57.208
STRG.762.2	1554	STRG.762	-	-	IntronRetention	4.44081	16	63.1966	177	110.75	0	258	0.0702699	0.0903955	AAGT-AGGA/AGGT-AGAC/AGGT-AGAC/CCGT-AGGG/GAGT-AGCA	66.6025
STRG.762.3	1549	STRG.762	-	-	IntronRetention	3.95051	6	63.1966	177	110.75	0	278	0.0625115	0.0338983	AAGT-AGGA/AGGT-AGAC/AGGT-AGAC/GGGT-AGGT/GAGT-AGCA	69.27
STRG.762.4	1549	STRG.762	-	-	IntronRetention	3.80914	15	63.1966	177	110.75	0	50	0.0602745	0.0847458	AAGT-AGGA/AGGT-AGAC/GGGT-AGGT/CCGT-AGGG/GAGT-AGCA	71.125
STRG.762.5	1595	STRG.762	-	-	IntronRetention	3.52929	15	63.1966	177	110.75	0	50	0.0558462	0.0847458	AAGT-AGGA/AGGT-AGAC/CCGT-AGGG/GAGT-AGCA	72.7358
STRG.780.1	1944	STRG.780	SPAC20H4.09	-	Reference	13.6798	66	20.0675	103	35.7625	0	647	0.681689	0.640777	CAGT-AGGA/TCGT-AGAA/AGGT-AGCC/AGGT-AGGA/AGGT-AGGA/CTGT-AGTT/TGGT-AGTT/AGGT-AGCT	44.7392
STRG.780.2	1982	STRG.780	-	-	IntronRetention	6.38771	37	20.0675	103	35.7625	0	630	0.318311	0.359223	CAGT-AGGA/TCGT-AGAA/AGGT-AGCC/AGGT-AGGA/AGGT-AGGA/CTGT-AGTT/TGGT-AGTT	NA
STRG.796.1	3601	STRG.796	SPAC23C11.15	pst2	Reference	10.5559	13	13.8313	17	111.043	0	1075	0.76319	0.764706	TGGT-AGAC/ATGT-AGTG	52.596
STRG.796.2	3655	STRG.796	-	-	IntronRetention	3.2754	4	13.8313	17	111.043	1	77	0.23681	0.235294	TGGT-AGAC	NA
STRG.799.1	437	STRG.799	-	-	IntronRetention	3.01375	1	7.62446	34	22.4932	1	63	0.395274	0.0294118	GAGT-AGGT	NA
STRG.799.2	3190	STRG.799	SPAC13F5.01c	msh1	Reference	4.61071	33	7.62446	34	22.4932	0	941	0.604726	0.970588	GAGT-AGGA/AGGT-AGGT	47.6471
STRG.824.1	2725	STRG.824	-	-	IntronRetention	6.50014	92	90.945	241	433.693	9	29	0.0714733	0.381743	AAAA	52.1197
STRG.824.2	1603	STRG.824	SPAC18G6.15	mal3	Reference	84.4449	149	90.945	241	433.693	0	308	0.928527	0.618257	AAGT-AGGT	45.9345
STRG.829.1	1085	STRG.829	SPAC13G7.03	upf3	Reference	43.4629	127	53.1894	163	117.896	0	278	0.817135	0.779141	GGGT-AGTA/GAGT-AGAC	63.1979
STRG.829.2	1123	STRG.829	-	-	IntronRetention	9.72649	36	53.1894	163	117.896	1	65	0.182865	0.220859	GAGT-AGAC	70.4256
STRG.844.1	1860	STRG.844	-	-	IntronRetention	3.01756	24	59.7612	259	231.487	0	213	0.0504935	0.0926641	ATGT-AGAG/TGGT-AGGT/AAGT-AGTT/GGGT-AGGC	60.2636
STRG.844.2	1279	STRG.844	SPAC4G9.14	sym1	Reference	56.7437	235	59.7612	259	231.487	0	221	0.949506	0.907336	ATGT-AGAG/TGGT-AGGT/AAGT-AGTT/TGGT-AGGG/AAGT-AGGC	53.5159
STRG.859.1	1138	STRG.859	SPAC13G7.11	mba1	Reference	45.2244	119	59.6989	177	74.8005	0	269	0.757542	0.672316	GCGT-AGAA/AAGT-AGTC	42.5767
STRG.859.2	1239	STRG.859	-	-	IntronRetention	14.4745	58	59.6989	177	74.8005	4	130	0.242458	0.327684	GCGT-AGAA	56.588
STRG.870.1	1219	STRG.870	SPAC6C3.09	rpp40	Reference	77.3128	278	106.979	362	307.455	0	335	0.722692	0.767956	AGGT-AGTT/TGGT-AGGA/AGGT-AGGT/AGGT-AGGA	48.7287
STRG.870.2	1259	STRG.870	-	-	IntronRetention	29.6662	84	106.979	362	307.455	0	286	0.277308	0.232044	AGGT-AGTT/TGGT-AGGA/AGGT-AGGT	47.2868
STRG.879.1	2526	STRG.879	-	-	IntronRetention	132.61	565	367.888	1423	953.306	23	26	0.360464	0.397048	AAAA	52.4497
STRG.879.2	1053	STRG.879	SPAC17G8.08c	gdt2	Reference	189.258	858	367.888	1423	953.306	0	287	0.514446	0.602952	CTGT-AGAA	44.9602
STRG.884.1	3447	STRG.884	SPAC17G8.13c	mst2	Reference	28.731	181	33.5364	199	106.839	0	407	0.856711	0.909548	AGGT-AGAT/CGGT-AGAT	48.9208
STRG.884.2	3494	STRG.884	-	-	IntronRetention	4.80539	18	33.5364	199	106.839	0	205	0.143289	0.0904523	AGGT-AGAT	64.9086
STRG.888.1	3396	STRG.888	-	-	IntronRetention	3.55063	23	30.7039	226	210.23	0	934	0.115641	0.10177	CGGT-AGAT/AAGT-AGAG/ATGT-AGTT/TCGT-AGAT/AGGT-AGTT	68.845
STRG.888.2	3261	STRG.888	SPAC22H10.03c	kap114	Reference	27.1532	203	30.7039	226	210.23	0	993	0.884359	0.89823	CGGT-AGAT/AAGT-AGAG/ATGT-AGTT/TCGT-AGAT/TGGT-AGAT/AGGT-AGTT	49.0726
STRG.902.1	744	STRG.902	-	-	IntronRetention	194.792	78	265.091	1581	2904.07	11	45	0.734812	0.0493359	TTGT-AGAG/TGGT-AGTT	56.0164
STRG.902.2	725	STRG.902	SPAC15F9.03c	nxt2	Reference	70.2988	1503	265.091	1581	2904.07	0	123	0.265188	0.950664	TGGT-AGAC/ACGT-AGAG/TTGT-AGAG/TGGT-AGTT	41.855
STRG.904.1	827	STRG.904	-	-	IntronRetention	175.02	127	279.433	1397	637.68	0	4	0.62634	0.0909091	AAGT-AGGT	68.6506
STRG.904.2	795	STRG.904	-	-	IntronRetention	98.2135	29	279.433	1397	637.68	0	4	0.351474	0.0207588	GTGT-AGTA	72.8042
STRG.904.3	836	STRG.904	SPAC23H3.02c	ini1	Reference	6.19933	1241	279.433	1397	637.68	0	117	0.0221854	0.888332	GCGT-AGAT/GTGT-AGTA/AAGT-AGGT	45.6734
STRG.929.1	1306	STRG.929	SPAC1B9.03c	-	Reference	228.134	513	315.434	586	431.919	0	389	0.723237	0.875427	GGGT-AGGT/CGGT-AGAT	46.5554
STRG.929.2	1364	STRG.929	-	-	IntronRetention	87.3003	73	315.434	586	431.919	1	10	0.276763	0.124573	CGGT-AGAT	54.4286
STRG.947.1	2352	STRG.947	SPAC32A11.01	mug8	Reference	4.01485	7	7.21988	21	7.30373	0	720	0.556082	0.333333	AGGT-AGAA/AGGT-AGAT	51.188
STRG.947.2	2388	STRG.947	-	-	IntronRetention	1.92156	4	7.21988	21	7.30373	0	210	0.266149	0.190476	AGGT-AGAA	137.265
STRG.947.3	2385	STRG.947	-	-	IntronRetention	0.73969	10	7.21988	21	7.30373	1	51	0.102452	0.47619	TAGT-AGAT	63.2886
STRG.947.4	2325	STRG.947	-	-	IntronRetention	0.543779	0	7.21988	21	7.30373	0	210	0.0753169	0	AGGT-AGAA/TAGT-AGAT	NA
STRG.955.1	484	STRG.955	SPAC19A8.09	yos1	Reference	130.556	610	163.332	627	463.628	0	81	0.799327	0.972887	TGGT-AGTC/AAGT-AGTT/TTGT-AGTC	41.9755
STRG.955.2	526	STRG.955	-	-	IntronRetention	32.7763	17	163.332	627	463.628	0	66	0.200673	0.0271132	TGGT-AGTC/AAGT-AGTT	59.8258
STRG.975.1	1285	STRG.975	SPAC823.09c	-	Reference	61.0372	190	76.215	248	78.6779	0	345	0.800857	0.766129	GAGT-AGTG/TGGT-AGAA/TGGT-AGGT	44.0748
STRG.975.2	1337	STRG.975	-	-	IntronRetention	15.1777	58	76.215	248	78.6779	0	285	0.199143	0.233871	GAGT-AGTG/TGGT-AGGT	52.203
STRG.1012.1	2249	STRG.1012	SPAC644.11c	pkp1	Reference	69.3157	141	81.2429	170	165.594	0	425	0.85319	0.829412	TGGT-AGGC/AGGT-AGGA/CTGT-AGGG	51.3411
STRG.1012.2	2311	STRG.1012	-	-	IntronRetention	11.9272	29	81.2429	170	165.594	3	41	0.14681	0.170588	AGGT-AGGA/CTGT-AGGG	60.4813
STRG.1017.1	1274	STRG.1017	SPAC644.18c	bet3	Reference	182.163	613	212.99	733	344.163	0	183	0.855266	0.836289	TTGT-AGAA/ATGT-AGGG/TGGT-AGTT	46.0285
STRG.1017.2	1321	STRG.1017	-	-	IntronRetention	30.827	120	212.99	733	344.163	1	55	0.144734	0.163711	TTGT-AGAA/TGGT-AGTT	51.5955
STRG.1030.1	632	STRG.1030	SPAC6F6.07c	rps13	Reference	2013.81	7061	3962.13	15028	39344.8	0	151	0.508266	0.469856	TGGT-AGGT/TGGT-AGGT/AGGT-AGGC	36.7679
STRG.1030.2	695	STRG.1030	-	-	IntronRetention	1948.32	7967	3962.13	15028	39344.8	20	86	0.491734	0.530144	TGGT-AGGT/AGGT-AGGC	41.0176
STRG.1035.1	1723	STRG.1035	SPAC6F6.12	atg24	Reference	67.7073	207	74.2678	241	180.793	0	401	0.911664	0.858921	AGGT-AGAC/TGGT-AGAA	62.3109
STRG.1035.2	1811	STRG.1035	-	-	IntronRetention	6.56053	34	74.2678	241	180.793	1	95	0.0883361	0.141079	AGGT-AGAC	69.7148
STRG.1049.1	1024	STRG.1049	SPAC3F10.19	spd2	Reference	110.32	554	124.284	559	1376.72	0	102	0.887649	0.991055	GTGT-AGTC/AGGT-AGCT	50.65
STRG.1049.2	596	STRG.1049	-	-	IntronRetention	13.9633	5	124.284	559	1376.72	0	28	0.112351	0.00894454	AGGT-AGCT	135.1
STRG.1050.1	1324	STRG.1050	SPAC3F10.08c	faf1	Reference	67.6847	426	121.422	426	196.72	0	259	0.557431	1	AAAA	41.1
STRG.1050.2	406	STRG.1050	-	-	IntronInclusion	53.7378	0	121.422	426	196.72	0	6	0.442569	0	AAAA	NA
STRG.1054.1	3158	STRG.1054	SPAC6F6.16c	tpz1	Reference	23.0597	117	26.3748	123	261.083	0	508	0.87431	0.95122	AGGT-AGTA/AAGT-AGTT/AGGT-AGGA/AGGT-AGGA/AGGT-AGAA	56.4113
STRG.1054.2	1476	STRG.1054	-	-	IntronRetention	3.31504	6	26.3748	123	261.083	0	171	0.12569	0.0487805	AGGT-AGTA/AAGT-AGTT/AGGT-AGGA/AGGT-AGAA	40.16
STRG.1149.1	1595	STRG.1149	SPAC24C9.15c	spn5	Reference	17.802	51	20.8512	59	6.89866	0	464	0.853764	0.864407	TGGT-AGCT/AGGT-AGTG	42.1116
STRG.1149.2	2377	STRG.1149	-	-	IntronRetention	3.0492	8	20.8512	59	6.89866	0	187	0.146236	0.135593	AGGT-AGTG	NA
STRG.1152.1	1796	STRG.1152	SPAC688.14	set13	Reference	33.3203	93	42.1126	118	158.657	0	468	0.791218	0.788136	AGGT-AGGA/ACGT-AGAT/GGGT-AGTG	46.9258
STRG.1152.2	1844	STRG.1152	-	-	IntronRetention	8.79234	25	42.1126	118	158.657	1	58	0.208782	0.211864	ACGT-AGAT/GGGT-AGTG	48.7846
STRG.1200.1	691	STRG.1200	SPAC6G9.07c	arc4	Reference	582.376	1	679.434	9	2093.55	0	168	0.85715	0.111111	TGGT-AGTC/AGGT-AGTG/AGGT-AGGG	NA
STRG.1200.2	706	STRG.1200	-	-	IntronRetention	97.0573	8	679.434	9	2093.55	0	12	0.14285	0.888889	AGGT-AGTG/AGGT-AGGG	77.2017
STRG.1213.1	1679	STRG.1213	-	-	IntronRetention	101.229	4	166.636	604	337.905	0	71	0.607486	0.00662252	AGAG	69.87
STRG.1213.2	1464	STRG.1213	SPAC1486.09	nob1	Reference	65.407	600	166.636	604	337.905	0	388	0.392514	0.993377	AGGT-AGTT	49.2402
STRG.1216.1	1078	STRG.1216	SPAC6G10.04c	pre5	Reference	397.528	915	572.515	935	1667.96	0	272	0.694353	0.97861	TGGT-AGAT/AGGT-AGAG/AGGT-AGTA	40.8856
STRG.1216.2	1089	STRG.1216	-	-	IntronRetention	174.987	20	572.515	935	1667.96	0	8	0.305647	0.0213904	AGGT-AGAG/AGGT-AGTA	42.3327
STRG.1219.1	4042	STRG.1219	-	-	IntronInclusion	18.568	0	207.882	496	1935.37	0	540	0.0893199	0	AAGT-AGAA/TTTC-AGTA	NA
STRG.1219.3	3652	STRG.1219	SPAC6G10.09	gls1	Reference	63.536	496	207.882	496	1935.37	0	808	0.305635	1	AAGT-AGAA	40.8339
STRG.1231.1	1736	STRG.1231	SPAPB1E7.14	iec5	Reference	53.2185	148	77.1199	205	124.997	0	144	0.690074	0.721951	CGGT-AGCT/AGGT-AGAT	41.5992
STRG.1231.2	1781	STRG.1231	-	-	IntronRetention	23.9014	57	77.1199	205	124.997	6	22	0.309926	0.278049	AGGT-AGAT	43.7979
STRG.1300.1	1984	STRG.1300	SPAC328.05	hrb1	Reference	2.10134	3	5.85081	7	53.0712	0	464	0.359153	0.428571	GGGT-AGAA/AGGT-AGGG/AAGT-AGGA/ACGT-AGTT/ATGT-AGTT	49.28
STRG.1300.2	1894	STRG.1300	-	-	IntronRetention	2.39519	1	5.85081	7	53.0712	0	8	0.409378	0.142857	AGGT-AGGG/AAGT-AGGA/ACGT-AGTT/ATGT-AGTT	45.24
STRG.1300.3	1896	STRG.1300	-	-	IntronRetention	1.35428	3	5.85081	7	53.0712	0	477	0.231469	0.428571	GGGT-AGAA/AGGT-AGGG/ACGT-AGTT/ATGT-AGTT	77.88
STRG.1307.1	4980	STRG.1307	-	-	IntronInclusion	1.55652	0	7.86073	31	346.999	0	1235	0.198013	0	AGGT-AGGC/TGGT-AGCC	NA
STRG.1307.2	4973	STRG.1307	-	-	IntronInclusion	0.587	0	7.86073	31	346.999	0	1400	0.074675	0	AGGT-AGGC/AGCT-AGCT	NA
STRG.1307.3	4782	STRG.1307	SPAC16E8.01	shd1	Reference	5.71721	31	7.86073	31	346.999	0	1420	0.727312	1	AGGT-AGGC	52.2421
STRG.1308.1	896	STRG.1308	SPAC16E8.02	mpo1	Reference	0.182224	37	13.8861	38	69.9168	0	222	0.0131228	0.973684	ATGT-AGCT/AGGT-AGTT	60.9
STRG.1308.3	1154	STRG.1308	-	-	IntronRetention	0.894432	1	13.8861	38	69.9168	0	38	0.0644122	0.0263158	ATGT-AGCT	63.83
STRG.1318.2	2276	STRG.1318	-	-	IntronRetention	7.75149	52	101.951	300	150.285	1	21	0.0760316	0.173333	GGGT-AGAT	48.51
STRG.1318.3	835	STRG.1318	SPAC16E8.12c	png3	Reference	1.02475	248	101.951	300	150.285	0	211	0.0100514	0.826667	CGGT-AGCA/GGGT-AGAT	48.0286
STRG.1321.1	2174	STRG.1321	-	-	IntronRetention	46.2258	183	61.3515	238	156.43	4	51	0.753459	0.768908	AGCG	72.13
STRG.1321.2	2030	STRG.1321	SPAC16E8.16	sua7	Reference	15.1256	55	61.3515	238	156.43	0	340	0.246541	0.231092	GGGT-AGAT	67.0087
STRG.1324.1	1891	STRG.1324	SPAC1B1.01	deb1	Reference	16.1701	28	31.8893	28	301.15	0	478	0.507068	1	AGGT-AGCT	56.4667
STRG.1324.2	1749	STRG.1324	-	-	IntronInclusion	15.7193	0	31.8893	28	301.15	0	0	0.492932	0	AGGT-AGCT	NA
STRG.1354.1	966	STRG.1354	SPAC15A10.05c	mug182	Reference	15.2379	25	26.0259	34	141.613	0	242	0.585491	0.735294	CGGT-AGTG/CAGT-AGGT/GGGT-AGAG	56.6152
STRG.1354.2	2150	STRG.1354	-	-	IntronRetention	8.15596	6	26.0259	34	141.613	0	25	0.313378	0.176471	GGGT-AGAG	60.47
STRG.1354.3	991	STRG.1354	-	-	IntronRetention	1.3702	1	26.0259	34	141.613	0	178	0.0526475	0.0294118	CGGT-AGTG/CAGT-AGGT	59.58
STRG.1354.4	1031	STRG.1354	-	-	IntronRetention	1.26183	2	26.0259	34	141.613	0	28	0.0484836	0.0588235	CGGT-AGTG	52.12
STRG.1386.1	2163	STRG.1386	SPAC15E1.04	hal3	Reference	26.7672	145	30.6918	147	514.937	0	625	0.872129	0.986395	AATT	48.8201
STRG.1386.2	1865	STRG.1386	-	-	IntronInclusion	3.92458	2	30.6918	147	514.937	0	526	0.127871	0.0136054	ATGT-AGCT	NA
STRG.1390.1	626	STRG.1390	SPAC15E1.08	naa10	Reference	479.021	1772	505.873	1897	1051.33	0	177	0.94692	0.934106	TTGT-AGAC/TCGT-AGAA/GAGT-AGCG/CAGT-AGCA	38.2009
STRG.1390.2	705	STRG.1390	-	-	IntronRetention	26.852	125	505.873	1897	1051.33	0	36	0.0530805	0.0658935	TCGT-AGAA/GAGT-AGCG/CAGT-AGCA	59.1903
STRG.1412.1	1324	STRG.1412	SPAC4H3.04c	-	Reference	6.61087	10	8.40972	18	38.6132	0	309	0.786099	0.555556	CCGT-AGAC/CTGT-AGTA	40.63
STRG.1412.2	1383	STRG.1412	-	-	IntronRetention	1.21839	4	8.40972	18	38.6132	0	47	0.144879	0.222222	CTGT-AGTA	75.0733
STRG.1412.3	1415	STRG.1412	-	-	IntronRetention	0.580458	4	8.40972	18	38.6132	0	107	0.0690223	0.222222	CCGT-AGAC	64.3325
STRG.1414.1	2599	STRG.1414	SPAC4H3.16	-	Reference	36.2941	336	52.9735	450	194.877	0	107	0.685137	0.746667	TAGT-AGTG/ATGT-AGGT	44.0023
STRG.1414.2	525	STRG.1414	-	-	IntronRetention	16.6794	114	52.9735	450	194.877	1	25	0.314863	0.253333	ATGT-AGGT	50.6293
STRG.1442.1	934	STRG.1442	SPAC323.02c	pup2	Reference	484.897	928	587.653	966	1491.23	0	247	0.825142	0.960663	AGGT-AGAA/CTGT-AGAT/AAGT-AGGA	40.2924
STRG.1442.2	959	STRG.1442	-	-	IntronRetention	102.756	38	587.653	966	1491.23	0	8	0.174858	0.0393375	CTGT-AGAT/AAGT-AGGA	64.9444
STRG.1457.1	785	STRG.1457	-	-	IntronRetention	399.526	99	418.815	2142	1276.78	3	11	0.953943	0.0462185	CTGT-AGGT	58.5752
STRG.1457.2	680	STRG.1457	SPAC2F3.18c	-	Reference	19.2895	2043	418.815	2142	1276.78	0	85	0.0460574	0.953782	AGGT-AGCT/CTGT-AGGT	41.0946
STRG.1462.1	3784	STRG.1462	-	-	IntronRetention	2.17748	6	9.6304	25	66.4005	1	360	0.226105	0.24	GTGT-AGTT/ATGT-AGTT	53.395
STRG.1462.2	2875	STRG.1462	SPAC2F3.15	lsk1	Reference	7.45292	19	9.6304	25	66.4005	0	593	0.773895	0.76	GTGT-AGTT/AAGT-AGGT/ATGT-AGTT	60.496
STRG.1471.1	1413	STRG.1471	SPAC27E2.02	yih1	Reference	34.9472	196	43.2844	196	62.6951	0	280	0.807387	1	AGGT-AGGC/TGGT-AGTC	54.8184
STRG.1471.2	955	STRG.1471	-	-	IntronInclusion	4.78996	0	43.2844	196	62.6951	0	177	0.110663	0	CAGT-AGAA/AGGT-AGGC/TGGT-AGTC	NA
STRG.1471.3	1087	STRG.1471	-	-	IntronRetention	3.54718	0	43.2844	196	62.6951	0	211	0.0819506	0	TGGT-AGTC	NA
STRG.1496.1	1368	STRG.1496	-	-	IntronInclusion	8.24206	4	48.1996	104	1304.13	0	39	0.170998	0.0384615	AGCT-AGCT	29.7067
STRG.1496.2	5105	STRG.1496	SPAC19G12.16c	adg2	Reference	29.8372	97	48.1996	104	1304.13	0	670	0.619034	0.932692	AGAC	60.073
STRG.1496.3	1589	STRG.1496	-	-	IntronInclusion	5.89355	0	48.1996	104	1304.13	0	0	0.122274	0	GTGT-AGTG	NA
STRG.1496.4	1428	STRG.1496	-	-	IntronInclusion	4.22679	3	48.1996	104	1304.13	0	0	0.0876935	0.0288462	GTGT-AGTG/GTGT-AGTG	52.9167
STRG.1499.1	3192	STRG.1499	-	-	IntronRetention	11.2029	5	21.2918	43	142.222	1	14	0.526162	0.116279	GAGT-AGTG/AGGT-AGCG	55.74
STRG.1499.2	1940	STRG.1499	SPAC23A1.06c	cmk2	Reference	10.0889	38	21.2918	43	142.222	0	504	0.473838	0.883721	CGGT-AGGG/GAGT-AGTG/AGGT-AGCG	58.7416
STRG.1508.1	2243	STRG.1508	SPAC26H5.03	pcf2	Reference	18.8975	49	21.1961	56	94.6799	0	512	0.891558	0.875	GGGT-AGAT/AGGT-AGGA/AGGT-AGGG	52.7613
STRG.1508.2	2256	STRG.1508	-	-	IntronRetention	2.29854	7	21.1961	56	94.6799	1	81	0.108442	0.125	GGGT-AGAT/AGGT-AGGG	71.3967
STRG.1521.1	1691	STRG.1521	-	-	IntronInclusion	30.0946	2	121.313	482	1304.86	0	383	0.248073	0.00414938	TGGT-AGAC/TCGT-AGTG/ATGT-AGCC	NA
STRG.1521.2	1713	STRG.1521	SPAC26H5.07c	-	Reference	91.2188	480	121.313	482	1304.86	0	505	0.751927	0.995851	TGGT-AGAC/TCGT-AGTG	45.8832
STRG.1533.1	939	STRG.1533	SPAC25B8.20	smp1	Reference	41.9424	86	76.344	155	0	0	72	0.549387	0.554839	GAGT-AGGA	44.2658
STRG.1533.3	1004	STRG.1533	-	-	IntronRetention	13.7731	69	76.344	155	0	0	48	0.180408	0.445161	GAAT	50.01
STRG.1541.1	2716	STRG.1541	SPAC1F7.05	cdc22	Reference	13.5824	43	81.8701	48	1589	0	811	0.165901	0.895833	AGGT-AGAC	53.2919
STRG.1541.2	3032	STRG.1541	-	-	IntronRetention	68.2877	5	81.8701	48	1589	2	15	0.834099	0.104167	AATT	62.1833
STRG.1602.1	1181	STRG.1602	-	-	IntronRetention	16.7271	40	192.067	560	100.955	0	30	0.0870898	0.0714286	AGGT-AGTC/TGGT-AGGC/CGGT-AGTT	75.3325
STRG.1602.2	1041	STRG.1602	SPAC30.03c	tsn1	Reference	144.575	423	192.067	560	100.955	0	220	0.752731	0.755357	AGGT-AGAA/AAGT-AGAT/AGGT-AGTC/TGGT-AGGC/CGGT-AGTT	43.8736
STRG.1602.3	1089	STRG.1602	-	-	IntronRetention	30.7651	97	192.067	560	100.955	0	236	0.160179	0.173214	AGGT-AGAA/AGGT-AGTC/TGGT-AGGC/CGGT-AGTT	56.9228
STRG.1612.1	1964	STRG.1612	-	-	IntronRetention	72.2765	150	547.059	1750	1338.71	0	68	0.132118	0.0857143	CTGT-AGTA	76.1061
STRG.1612.2	1864	STRG.1612	-	-	IntronRetention	30.0748	334	547.059	1750	1338.71	0	68	0.0549754	0.190857	AAGT-AGCG/CTGT-AGTA	74.8149
STRG.1612.3	1301	STRG.1612	SPAC29E6.08	tbp1	Reference	444.707	1266	547.059	1750	1338.71	0	231	0.812906	0.723429	GAGT-AGCT/AAGT-AGCG/CTGT-AGTA	52.0294
STRG.1615.2	3740	STRG.1615	-	-	IntronRetention	29.3602	0	152.641	254	1631.66	0	57	0.192348	0	AATT	NA
STRG.1615.3	3715	STRG.1615	-	-	IntronRetention	23.9224	0	152.641	254	1631.66	0	57	0.156723	0	AATT	NA
STRG.1615.4	1579	STRG.1615	SPAC16.03c	ura2	Reference	19.8174	254	152.641	254	1631.66	0	337	0.12983	1	TGGT-AGCC	43.3033
STRG.1643.1	1242	STRG.1643	SPAC17C9.05c	pmc3	Reference	29.6602	88	33.5213	105	82.7006	0	273	0.884815	0.838095	AGGT-AGCT/AAGT-AGGT/AAGT-AGAC/TGGT-AGCC	52.0742
STRG.1643.2	1194	STRG.1643	-	-	IntronRetention	3.86114	17	33.5213	105	82.7006	0	79	0.115185	0.161905	AGGT-AGCT/AAGT-AGGT/TGGT-AGCC	76.9345
STRG.1661.1	1663	STRG.1661	SPAC637.06	gmh5	Reference	178.8	629	197.286	632	521.021	0	347	0.906301	0.995253	AATA	43.8251
STRG.1661.2	1348	STRG.1661	-	-	IntronInclusion	18.4854	3	197.286	632	521.021	0	294	0.0936989	0.00474684	TCGT-AGGT	NA
STRG.1681.1	1039	STRG.1681	SPAC12B10.13	gid8	Reference	97.3651	318	104.09	342	236.73	0	240	0.935389	0.929825	TCGT-AGAG/AGGT-AGAT	46.6271
STRG.1681.2	1103	STRG.1681	-	-	IntronRetention	6.72537	24	104.09	342	236.73	0	34	0.0646108	0.0701754	AGGT-AGAT	122.01
STRG.1712.2	3183	STRG.1712	-	-	IntronRetention	22.3306	185	307.246	1330	4035.22	2	15	0.0726801	0.139098	AGGT-AGGG	60.4142
STRG.1712.3	1373	STRG.1712	SPAC144.03	ade2	Reference	131.591	1145	307.246	1330	4035.22	0	434	0.428291	0.860902	GGGT-AGAA/AGGT-AGGG	44.2717
STRG.1722.1	2801	STRG.1722	SPAC144.17c	-	Reference	20.9835	130	24.2096	148	0	0	449	0.866742	0.878378	TGGT-AGCT/AGGT-AGGA	47.9958
STRG.1722.2	2803	STRG.1722	-	-	IntronRetention	3.22611	18	24.2096	148	0	0	432	0.133258	0.121622	TGGT-AGCT	47.7667
STRG.1739.1	3930	STRG.1739	-	-	IntronRetention	5.70696	14	9.49786	29	0	1	152	0.600868	0.482759	AGGT-AGGT/AGGT-AGTA/AGGT-AGTT	57.862
STRG.1739.2	1315	STRG.1739	SPAC458.04c	dli1	Reference	3.7909	15	9.49786	29	0	0	360	0.399132	0.517241	AGGT-AGGT/AGGT-AGTA/TCGT-AGAG/AGGT-AGTT	52.2783
STRG.1743.1	1468	STRG.1743	SPAC458.07	tfa1	Reference	54.1713	151	61.1704	173	204.687	0	434	0.885579	0.872832	GCGT-AGAC/ATGT-AGTC/ATGT-AGGA	51.3346
STRG.1743.2	1510	STRG.1743	-	-	IntronRetention	6.99917	22	61.1704	173	204.687	1	448	0.114421	0.127168	ATGT-AGTC/ATGT-AGGA	59.82
STRG.1759.2	817	STRG.1759	SPAC11H11.03c	-	Reference	45.3487	388	101.786	508	232.485	0	206	0.445528	0.76378	AGGT-AGTA/AGGT-AGCG/ATGT-AGTA	54.9858
STRG.1759.3	3666	STRG.1759	-	-	IntronRetention	13.2175	120	101.786	508	232.485	18	77	0.129855	0.23622	AGGT-AGTA/ATGT-AGTA	61.8777
STRG.1811.1	1252	STRG.1811	SPAC1B3.02c	-	Reference	324.525	1747	820.596	1875	2002.53	0	107	0.395475	0.931733	CTGT-AGTT/CTGT-AGTG/AGGT-AGCT	42.0368
STRG.1811.2	2870	STRG.1811	-	-	IntronRetention	132.618	128	820.596	1875	2002.53	0	41	0.161612	0.0682667	CTGT-AGTT/AGGT-AGCT	55.8506
STRG.1813.1	2443	STRG.1813	-	-	IntronRetention	14.3492	49	21.2592	73	23.7681	0	646	0.674963	0.671233	CTGT-AGTT	42.6662
STRG.1813.2	2292	STRG.1813	SPAC1B3.04c	guf1	Reference	6.91004	24	21.2592	73	23.7681	0	652	0.325037	0.328767	CTGT-AGTT/CGGT-AGGT	47.5175
STRG.1832.1	1543	STRG.1832	SPAC1952.07	rad1	Reference	15.3987	167	25.9559	205	151.174	0	323	0.593266	0.814634	GGGT-AGCT/GAGT-AGAG	54.1262
STRG.1832.2	1669	STRG.1832	-	-	IntronRetention	10.5571	38	25.9559	205	151.174	1	54	0.406734	0.185366	GAGT-AGAG	48.9367
STRG.1860.1	2191	STRG.1860	-	-	IntronRetention	34.4855	182	41.8712	212	525.801	58	631	0.823608	0.858491	GATT	57.7438
STRG.1860.2	2152	STRG.1860	SPAC22E12.10c	etp1	Reference	7.38574	30	41.8712	212	525.801	0	616	0.176392	0.141509	AGGT-AGAA	61.892
STRG.1862.1	1086	STRG.1862	SPAC22E12.13c	rlp24	Reference	494.284	1603	611.954	1655	941.455	0	192	0.807715	0.96858	AGGT-AGGG/AGGT-AGGT	44.4157
STRG.1862.2	1107	STRG.1862	-	-	IntronRetention	117.669	52	611.954	1655	941.455	1	35	0.192285	0.0314199	AGGT-AGGT	50.7397
STRG.1864.1	2980	STRG.1864	SPAC22E12.16c	pik1	Reference	16.1213	40	17.4074	42	104.748	0	851	0.926119	0.952381	ATGT-AGGA/ACGT-AGAT/ATGT-AGTC	53.1875
STRG.1864.2	2878	STRG.1864	-	-	IntronInclusion	1.28608	2	17.4074	42	104.748	0	277	0.0738811	0.047619	ATGT-AGGA/ACGT-AGAT/ATGT-AGTC/TTGT-AGCC	67.25
STRG.1865.1	2102	STRG.1865	SPAC22E12.17c	glo3	Reference	84.0683	167	94.4975	190	732.594	0	483	0.889635	0.878947	AGGT-AGGT/AGGT-AGAT	49.1528
STRG.1865.2	2144	STRG.1865	-	-	IntronRetention	10.4292	23	94.4975	190	732.594	0	24	0.110365	0.121053	AGGT-AGAT	48.2759
STRG.1867.1	5887	STRG.1867	-	-	IntronRetention	34.7498	115	50.1943	200	89.0766	0	653	0.692306	0.575	AGGT-AGTT/AGGT-AGAT	81.3008
STRG.1867.2	2603	STRG.1867	SPAC1006.03c	red1	Reference	15.4445	85	50.1943	200	89.0766	0	712	0.307694	0.425	AGGT-AGTT/AGGT-AGAT/GGGT-AGAT	55.1138
STRG.1918.1	2660	STRG.1918	-	-	IntronRetention	0.968216	3	14.9956	45	16.3331	0	74	0.0645668	0.0666667	GTGT-AGAG	67.8033
STRG.1918.2	2558	STRG.1918	SPAC14C4.13	rad17	Reference	14.0274	42	14.9956	45	16.3331	0	606	0.935433	0.933333	ACGT-AGTT/GTGT-AGAG	54.9671
STRG.1953.1	915	STRG.1953	SPAC11E3.10	-	Reference	141.845	540	158.332	625	594.977	0	162	0.895872	0.864	GTGT-AGTT/CTGT-AGAG/CTGT-AGTA/TTGT-AGGC	43.013
STRG.1953.2	1082	STRG.1953	-	-	IntronRetention	16.4867	85	158.332	625	594.977	6	29	0.104128	0.136	GTGT-AGTT/CTGT-AGTA/TTGT-AGGC	65.6394
STRG.1957.1	550	STRG.1957	SPAC11E3.15	rpl22	Reference	7943.76	28910	11678.5	40913	32303.8	0	117	0.680206	0.706621	TTGT-AGAA/CTGT-AGCT	33.6744
STRG.1957.2	584	STRG.1957	-	-	IntronRetention	3734.7	12003	11678.5	40913	32303.8	311	13	0.319794	0.293379	CTGT-AGCT	41.6764
STRG.2104.1	1099	STRG.2104	SPBC31E1.03	hub1	Reference	106.961	705	167.907	714	337.308	0	73	0.637025	0.987395	TGGT-AGTA/AGGT-AGAA	42.5984
STRG.2104.2	1282	STRG.2104	-	-	IntronRetention	60.9461	9	167.907	714	337.308	0	8	0.362975	0.012605	AGGT-AGAA	68.27
STRG.2123.1	2104	STRG.2123	SPBC1773.15	dal52	Reference	12.8918	58	13.5951	60	30.3828	0	497	0.948265	0.966667	AATT	52.6752
STRG.2123.2	1969	STRG.2123	-	-	IntronInclusion	0.703338	2	13.5951	60	30.3828	0	414	0.0517345	0.0333333	AAGT-AGGT	48.945
STRG.2154.1	634	STRG.2154	SPBC106.05c	tim11	Reference	394.489	1838	435.972	1954	2250.01	0	92	0.904849	0.940635	AGGT-AGAC/AGGT-AGAA	43.9765
STRG.2154.2	409	STRG.2154	-	-	IntronRetention	41.4833	116	435.972	1954	2250.01	3	22	0.0951513	0.0593654	AGGT-AGAA	76.3025
STRG.2169.1	4724	STRG.2169	-	-	IntronRetention	14.8248	4	25.7582	32	135.468	1	20	0.575538	0.125	ATGT-AGGA/CAGT-AGAC/AAGT-AGAT/AGGT-AGTA	58.2933
STRG.2169.2	2417	STRG.2169	SPBC106.20	exo70	Reference	10.9334	28	25.7582	32	135.468	0	615	0.424462	0.875	ATGT-AGGA/AGGT-AGCT/CAGT-AGAC/AAGT-AGAT/AGGT-AGTA	58.2855
STRG.2171.1	1752	STRG.2171	SPBC582.04c	dsh1	Reference	10.7524	204	26.2796	206	27.6314	0	583	0.409153	0.990291	ACGT-AGGC/GTGT-AGGC/AGGT-AGGG/CTGT-AGGC/TTGT-AGGA/AAGT-AGTA/TCGT-AGTG/AGGT-AGCA	62.4113
STRG.2171.3	6077	STRG.2171	-	-	IntronRetention	1.81268	2	26.2796	206	27.6314	0	451	0.0689766	0.00970874	ACGT-AGGC/GTGT-AGGC/AGGT-AGGG/CTGT-AGGC/TTGT-AGGA/AAGT-AGTA/AGGT-AGCA	71.08
STRG.2173.1	979	STRG.2173	SPBC582.09	pex11	Reference	433.086	1475	480.952	1542	1622.03	0	238	0.900477	0.95655	GTGT-AGAT/AAGT-AGAC/AAGT-AGAG	41.4863
STRG.2173.2	1004	STRG.2173	-	-	IntronRetention	47.8659	67	480.952	1542	1622.03	2	31	0.0995234	0.0434501	AAGT-AGAC/AAGT-AGAG	53.7515
STRG.2195.1	2217	STRG.2195	SPBC902.04	rmn1	Reference	69.2824	365	79.6904	366	284.843	0	589	0.869394	0.997268	AGGT-AGTA/ATGT-AGTT/AGGT-AGTT	51.1749
STRG.2195.2	1692	STRG.2195	-	-	IntronRetention	10.4081	1	79.6904	366	284.843	0	24	0.130606	0.00273224	ATGT-AGTT/AGGT-AGTT	NA
STRG.2204.2	795	STRG.2204	SPBC1685.16	vma9	Reference	85.4982	829	275.725	951	368.606	0	67	0.310084	0.871714	AGGT-AGTA/TGGT-AGGG	46.7919
STRG.2204.3	1123	STRG.2204	-	-	IntronRetention	27.1067	122	275.725	951	368.606	1	31	0.0983104	0.128286	TGGT-AGGG	63.1021
STRG.2210.1	470	STRG.2210	SPBC1685.10	rps27	Reference	80.8989	16507	6942.29	20066	37583.1	0	83	0.0116531	0.822635	TGGT-AGTT/TGGT-AGGA	38.8224
STRG.2210.2	380	STRG.2210	-	-	IntronRetention	6861.39	3559	6942.29	20066	37583.1	2	9	0.988347	0.177365	TGGT-AGGA	39.1421
STRG.2236.2	1258	STRG.2236	-	-	IntronRetention	1746.4	106	2163.62	110	14183.3	8	19	0.807163	0.963636	AAAT	51.8885
STRG.2236.3	651	STRG.2236	SPBC839.05c	rps1701	Reference	97.2607	4	2163.62	110	14183.3	0	131	0.0449527	0.0363636	TGGT-AGGG	35.23
STRG.2242.1	1984	STRG.2242	SPBC947.12	kms2	Reference	6.19349	12	11.1007	25	54.6158	0	457	0.557936	0.48	AAGT-AGGT/CGGT-AGGA	61.509
STRG.2242.2	2007	STRG.2242	-	-	IntronRetention	3.33818	7	11.1007	25	54.6158	0	31	0.300718	0.28	CGGT-AGGA	NA
STRG.2242.3	2030	STRG.2242	-	-	IntronRetention	1.56905	6	11.1007	25	54.6158	0	271	0.141347	0.24	AAGT-AGGT	53.715
STRG.2243.1	3025	STRG.2243	SPBC947.11c	elg1	Reference	12.3768	55	14.3277	65	50.5643	0	920	0.863835	0.846154	TGGT-AGAA/AAGT-AGAC	54.85
STRG.2243.2	3075	STRG.2243	-	-	IntronRetention	1.95094	10	14.3277	65	50.5643	0	861	0.136165	0.153846	TGGT-AGAA	57.28
STRG.2270.1	1639	STRG.2270	SPBC119.01	rpn3	Reference	124.413	300	147.587	307	984.438	0	497	0.842977	0.977199	AGGT-AGAT/AGGT-AGAT	47.5524
STRG.2270.2	1628	STRG.2270	-	-	IntronRetention	23.1746	7	147.587	307	984.438	2	25	0.157023	0.0228013	AGGT-AGAT	48.094
STRG.2329.1	1330	STRG.2329	SPBC36.12c	git7	Reference	53.0821	254	65.4551	256	192.295	0	379	0.81097	0.992188	GGGT-AGGC/CTGT-AGTT	47.4078
STRG.2329.2	1063	STRG.2329	-	-	IntronRetention	12.373	2	65.4551	256	192.295	0	86	0.18903	0.0078125	CTGT-AGTT	87.95
STRG.2356.1	2079	STRG.2356	SPBC646.14c	orc5	Reference	40.8137	169	43.3796	169	78.6935	0	455	0.940849	1	TGGT-AGGT/TTGT-AGGC	53.9591
STRG.2356.2	989	STRG.2356	-	-	IntronRetention	2.56595	0	43.3796	169	78.6935	0	141	0.0591511	0	TTGT-AGGC	NA
STRG.2390.1	1558	STRG.2390	SPBC409.12c	stn1	Reference	40.2073	154	44.1457	172	21.1651	0	325	0.910786	0.895349	GCGT-AGGA/AGGT-AGTG	45.0758
STRG.2390.2	1706	STRG.2390	-	-	IntronRetention	3.9384	18	44.1457	172	21.1651	0	75	0.0892137	0.104651	GCGT-AGGA	40.414
STRG.2400.1	1985	STRG.2400	-	-	IntronRetention	6.52521	12	53.4436	152	244.102	1	456	0.122095	0.0789474	TAGT-AGTT/ATGT-AGTG	48.085
STRG.2400.2	1673	STRG.2400	SPBC4.02c	-	Reference	46.9184	140	53.4436	152	244.102	0	437	0.877905	0.921053	ATGT-AGAC/TAGT-AGTT/ATGT-AGTG	54.5532
STRG.2413.1	1862	STRG.2413	SPBC337.07c	ecm14	Reference	96.4006	378	105.297	407	428.88	0	497	0.915508	0.928747	TGGT-AGTG/CGGT-AGAA/TGGT-AGTT/ATGT-AGGG	42.7381
STRG.2413.2	1887	STRG.2413	-	-	IntronRetention	8.89673	29	105.297	407	428.88	0	467	0.0844915	0.0712531	TGGT-AGTG/CGGT-AGAA/TGGT-AGTT	33.955
STRG.2418.1	1798	STRG.2418	SPBC337.12	red5	Reference	46.2659	142	67.9107	201	153.782	0	376	0.681276	0.706468	TGGT-AGGT/AGGT-AGAA	66.2094
STRG.2418.2	3105	STRG.2418	-	-	IntronRetention	21.6448	59	67.9107	201	153.782	1	33	0.318724	0.293532	TGGT-AGGT	73.7158
STRG.2420.1	855	STRG.2420	-	-	IntronRetention	553.058	455	555.918	2150	538.083	5	20	0.994854	0.211628	GAGT-AGTG/AGGT-AGAA	60.7256
STRG.2420.2	817	STRG.2420	SPBC337.14	rpb4	Reference	2.86061	1695	555.918	2150	538.083	0	135	0.00514573	0.788372	AGGT-AGAG/GAGT-AGTG/AGGT-AGAA	34.8845
STRG.2430.1	1622	STRG.2430	SPBC1734.08	hse1	Reference	38.2918	144	41.7295	161	213.646	0	373	0.917619	0.89441	GTGT-AGTG/CGGT-AGCT/AGGT-AGAT	55.9365
STRG.2430.2	1795	STRG.2430	-	-	IntronRetention	3.43773	17	41.7295	161	213.646	0	74	0.0823813	0.10559	GTGT-AGTG/AGGT-AGAT	66.1733
STRG.2444.1	1705	STRG.2444	SPBC1709.06	dus2	Reference	49.5648	161	53.139	179	149.535	0	479	0.932738	0.899441	TGGT-AGAT/TGGT-AGGC	49.8347
STRG.2444.2	1943	STRG.2444	-	-	IntronRetention	3.57423	18	53.139	179	149.535	0	59	0.067262	0.100559	TGGT-AGGC	71.934
STRG.2462.1	983	STRG.2462	SPBC409.05	skp1	Reference	258.707	764	305.097	978	594.693	0	161	0.847951	0.781186	CGGT-AGAT/AGGT-AGAC/ATGT-AGGA	40.4211
STRG.2462.2	1036	STRG.2462	-	-	IntronRetention	46.3897	214	305.097	978	594.693	2	18	0.152049	0.218814	AGGT-AGAC/ATGT-AGGA	50.6381
STRG.2479.1	1337	STRG.2479	-	-	IntronRetention	30.008	91	43.8654	117	263.741	0	235	0.684094	0.777778	ATGT-AGAG/ACGT-AGAT/TGGT-AGAT	53.3729
STRG.2479.2	1280	STRG.2479	SPBC651.02	nit1	Reference	13.8574	26	43.8654	117	263.741	0	276	0.315906	0.222222	ATGT-AGAG/ACGT-AGAT/TGGT-AGAT/GGGT-AGGT	44.0353
STRG.2502.1	623	STRG.2502	SPBC3D6.08c	lsm1	Reference	598.089	2174	687.21	2271	2076.11	0	140	0.870315	0.957288	CAGT-AGGA/TGGT-AGCA/TGGT-AGGA	40.8968
STRG.2502.2	769	STRG.2502	-	-	IntronRetention	89.121	97	687.21	2271	2076.11	1	153	0.129685	0.0427125	CAGT-AGGA/TGGT-AGCA	69.4789
STRG.2516.1	2338	STRG.2516	-	-	IntronRetention	9.97619	4	34.751	148	13.6862	0	61	0.287076	0.027027	TTGT-AGAC/AAGT-AGTT	59.7633
STRG.2516.2	2399	STRG.2516	-	-	IntronRetention	8.46961	41	34.751	148	13.6862	0	61	0.243723	0.277027	AAGT-AGTT	68.514
STRG.2516.3	2421	STRG.2516	SPBC30B4.08	eri1	Reference	3.02623	103	34.751	148	13.6862	0	313	0.0870832	0.695946	AAGT-AGAG/TTGT-AGAC/AAGT-AGTT	52.5427
STRG.2516.4	1993	STRG.2516	-	-	IntronInclusion	13.279	0	34.751	148	13.6862	0	10	0.382117	0	TTGT-AGAC/AAGT-AGTT	NA
STRG.2519.1	4735	STRG.2519	-	-	IntronRetention	7.8385	19	24.5486	84	15.026	0	172	0.319305	0.22619	ATGT-AGAT/CGGT-AGAT/TAGT-AGTA/AGGT-AGTA/CGGT-AGAA/TGGT-AGCT	71.2557
STRG.2519.2	1692	STRG.2519	SPBC27B12.05	-	Reference	16.7101	65	24.5486	84	15.026	0	482	0.680695	0.77381	ATGT-AGAT/CGGT-AGAT/TTGT-AGAT/TAGT-AGTA/AGGT-AGTA/CGGT-AGAA/TGGT-AGCT	60.5793
STRG.2524.1	1000	STRG.2524	-	-	IntronRetention	78.5386	17	354.202	1245	2717.07	0	20	0.221734	0.0136546	AGGT-AGGA/CGGT-AGTG	73.5438
STRG.2524.2	605	STRG.2524	SPBC27B12.10c	tom7	Reference	275.663	1228	354.202	1245	2717.07	0	52	0.778266	0.986345	AGGT-AGGA/AGGT-AGGA/CGGT-AGTG	38.8276
STRG.2527.1	1977	STRG.2527	SPBC8D2.02c	vps68	Reference	24.4655	470	45.6536	470	452.396	0	170	0.535894	1	TGGT-AGTT/ATGT-AGTG	48.3283
STRG.2527.2	1587	STRG.2527	-	-	IntronInclusion	21.1881	0	45.6536	470	452.396	0	154	0.464106	0	TGGT-AGTT/ATGT-AGTG	NA
STRG.2556.1	1633	STRG.2556	SPBP22H7.06	nrk1	Reference	45.6556	176	69.0083	264	190.344	0	230	0.661595	0.666667	AGGT-AGTG/CGGT-AGAC/AGGT-AGAC/AGGT-AGGA	54.6989
STRG.2556.2	1684	STRG.2556	-	-	IntronRetention	17.705	61	69.0083	264	190.344	0	20	0.256564	0.231061	AGGT-AGTG/AGGT-AGAC/AGGT-AGGA	63.1104
STRG.2556.3	1858	STRG.2556	-	-	IntronRetention	5.64774	27	69.0083	264	190.344	3	20	0.0818415	0.102273	AGGT-AGTG/AGGT-AGGA	67.1567
STRG.2582.1	2596	STRG.2582	SPBC1215.02c	naa25	Reference	17.0602	221	25.606	248	573.149	0	811	0.666258	0.891129	TTGT-AGGT/GGGT-AGGA/AGGT-AGGC/AAGT-AGAT/AAGT-AGTC/AAGT-AGAT/AGGT-AGGT	41.9959
STRG.2582.2	3217	STRG.2582	-	-	IntronRetention	8.5458	27	25.606	248	573.149	0	786	0.333742	0.108871	TTGT-AGGT/GGGT-AGGA/AGGT-AGGC/AAGT-AGAT/AAGT-AGTC/AAGT-AGAT	47.2893
STRG.2590.1	1533	STRG.2590	SPBC83.09c	lin1	Reference	37.5896	205	42.4025	205	142.351	0	408	0.886493	1	GGGT-AGGA	41.441
STRG.2590.2	1074	STRG.2590	-	-	IntronInclusion	4.81297	0	42.4025	205	142.351	0	306	0.113507	0	GGGT-AGGA/AAGT-AGAG	NA
STRG.2635.1	1068	STRG.2635	-	-	IntronRetention	190.48	22	275.152	1122	254.656	0	59	0.69227	0.0196078	ATGT-AGTT	72.7492
STRG.2635.2	919	STRG.2635	SPBC1D7.01	pfd1	Reference	84.6728	1100	275.152	1122	254.656	0	112	0.30773	0.980392	ATGT-AGTT/ATGT-AGGT	43.4596
STRG.2655.1	904	STRG.2655	SPBC19C2.15c	phs1	Reference	84.355	127	138.488	185	612.44	0	208	0.609112	0.686486	TTGT-AGTA/TGGT-AGGT	41.9877
STRG.2655.2	956	STRG.2655	-	-	IntronRetention	46.378	23	138.488	185	612.44	0	197	0.334888	0.124324	TTGT-AGTA	70.0778
STRG.2655.3	954	STRG.2655	-	-	IntronRetention	7.75535	35	138.488	185	612.44	0	15	0.056	0.189189	TGGT-AGGT	54.48
STRG.2674.1	1817	STRG.2674	SPBC18H10.19	vps38	Reference	23.8436	63	34.3411	102	39.6379	0	474	0.694317	0.617647	CTGT-AGAA/ATGT-AGCC	52.9725
STRG.2674.2	2033	STRG.2674	-	-	IntronRetention	10.4975	39	34.3411	102	39.6379	1	90	0.305683	0.382353	ATGT-AGCC	69.69
STRG.2690.1	1029	STRG.2690	SPBC9B6.05c	lsm3	Reference	163.935	197	236.27	376	631.383	0	93	0.693845	0.523936	CAGT-AGGT/ATGT-AGGC/TGGT-AGAA/TGGT-AGGT	39.0144
STRG.2690.2	1082	STRG.2690	-	-	IntronRetention	47.6846	97	236.27	376	631.383	0	38	0.201822	0.257979	CAGT-AGGT/TGGT-AGAA/TGGT-AGGT	48.4161
STRG.2690.3	1136	STRG.2690	-	-	IntronRetention	24.6506	82	236.27	376	631.383	0	38	0.104332	0.218085	CAGT-AGGT/TGGT-AGGT	64.8965
STRG.2741.1	2424	STRG.2741	-	-	IntronRetention	1.04845	3	10.368	31	146.531	1	64	0.101124	0.0967742	AGGT-AGAA	NA
STRG.2741.2	2389	STRG.2741	SPBP23A10.14c	ell1	Reference	9.31951	28	10.368	31	146.531	0	533	0.898876	0.903226	CTGT-AGTC/AGGT-AGAA	56.889
STRG.2772.1	925	STRG.2772	SPBC29A3.10c	atp14	Reference	160.759	354	232.817	359	1196.37	0	103	0.690496	0.986072	TGGT-AGAA/CGGT-AGTC/AAGT-AGAA/CAGT-AGTA	50.2356
STRG.2772.2	909	STRG.2772	-	-	IntronRetention	72.0577	5	232.817	359	1196.37	2	15	0.309504	0.0139276	CGGT-AGTC/AAGT-AGAA/CAGT-AGTA	68.68
STRG.2775.1	4864	STRG.2775	-	-	IntronRetention	11.8361	22	37.2041	79	20.3046	1	153	0.318139	0.278481	AGGT-AGCT/TGGT-AGAA/AGGT-AGAT/AGGT-AGAC/AGGT-AGAT/AGGT-AGAA/AGGT-AGAT/GGGT-AGGC/TTGT-AGTT/AGGT-AGAT/AGGT-AGGA/AGGT-AGAT/GGGT-AGAT/TGGT-AGGC	49.8678
STRG.2775.2	4855	STRG.2775	-	-	IntronRetention	8.25586	50	37.2041	79	20.3046	0	945	0.221908	0.632911	AGGT-AGCT/TGGT-AGAA/ATGT-AGTA/AGGT-AGAT/AGGT-AGAC/AGGT-AGAT/AGGT-AGAA/AGGT-AGAT/GGGT-AGGC/TTGT-AGTT/AGGT-AGAT/AGGT-AGGA/AGGT-AGAT/GGGT-AGAT	62.0523
STRG.2775.3	3022	STRG.2775	SPBC29A3.14c	trt1	Reference	17.1121	7	37.2041	79	20.3046	0	988	0.459953	0.0886076	AGGT-AGCT/TGGT-AGAA/ATGT-AGTA/AGGT-AGAT/AGGT-AGAC/AGGT-AGAT/AGGT-AGAA/AGGT-AGAT/GGGT-AGGC/TTGT-AGTT/AGGT-AGAT/AGGT-AGGA/AGGT-AGAT/GGGT-AGAT/TGGT-AGGC	48.25
STRG.2777.1	1771	STRG.2777	SPBC29A3.15c	rsm23	Reference	70.0865	281	82.0238	281	344.867	0	476	0.854465	1	GATT	50.8738
STRG.2777.2	842	STRG.2777	-	-	IntronInclusion	11.9373	0	82.0238	281	344.867	0	0	0.145535	0	GATT	NA
STRG.2801.1	1186	STRG.2801	SPBC1711.04	mtd1	Reference	179.39	631	190.281	707	1119.4	0	320	0.942763	0.892504	CAGT-AGAG/GGGT-AGAT	50.0011
STRG.2801.2	1187	STRG.2801	-	-	IntronRetention	10.8911	76	190.281	707	1119.4	0	61	0.0572367	0.107496	CAGT-AGAG	65.2927
STRG.2822.1	1463	STRG.2822	SPBC17G9.02c	cdc73	Reference	75.4221	309	79.7249	328	304.719	0	371	0.94603	0.942073	GGGT-AGAA/TTGT-AGGA/AAGT-AGAT	50.3907
STRG.2822.2	1504	STRG.2822	-	-	IntronRetention	4.30274	19	79.7249	328	304.719	0	215	0.0539698	0.0579268	GGGT-AGAA/TTGT-AGGA	55.6114
STRG.2834.1	1841	STRG.2834	-	-	IntronRetention	69.1904	13	320.295	656	1408.95	0	12	0.216021	0.0198171	ATGT-AGAT/GGGT-AGAG	61.0811
STRG.2834.2	1281	STRG.2834	SPBC14C8.04	ilv6	Reference	251.105	643	320.295	656	1408.95	0	289	0.783979	0.980183	TGGT-AGGC/ATGT-AGAT/GGGT-AGAG	47.4337
STRG.2837.1	972	STRG.2837	-	-	IntronRetention	123.957	239	367.877	1327	363.334	0	79	0.336952	0.180106	CGGT-AGAT/AAGT-AGGA	58.8078
STRG.2837.2	507	STRG.2837	SPBC14C8.19	tam10	Reference	243.92	1088	367.877	1327	363.334	0	168	0.663048	0.819894	CGGT-AGAT/AAGT-AGGA/GGGT-AGTA	39.7521
STRG.2899.1	5578	STRG.2899	-	-	IntronRetention	3.38405	0	23.7768	37	117.051	0	45	0.142326	0	AGGT-AGAA/CAGT-AGTG	NA
STRG.2899.2	3451	STRG.2899	SPBC21D10.05c	ucp3	Reference	11.3697	12	23.7768	37	117.051	0	601	0.478185	0.324324	TGGT-AGGA/AGGT-AGAA/CAGT-AGTG	NA
STRG.2899.3	3546	STRG.2899	-	-	IntronRetention	9.02303	25	23.7768	37	117.051	4	106	0.379489	0.675676	TGGT-AGGA/AGGT-AGAA	39.42
STRG.2910.1	1622	STRG.2910	SPBP18G5.02	pgs1	Reference	33.0628	91	40.691	117	78.8288	0	502	0.812534	0.777778	GGGT-AGAG/AGGT-AGGA	45.6625
STRG.2910.2	1650	STRG.2910	-	-	IntronRetention	7.62818	26	40.691	117	78.8288	1	162	0.187466	0.222222	AGGT-AGGA	57.6926
STRG.2975.2	1308	STRG.2975	SPBC29A10.16c	-	Reference	188.633	1817	239.256	2018	1362.94	0	124	0.788412	0.900396	AGGT-AGGC/CCGT-AGAT	42.3827
STRG.2975.3	1356	STRG.2975	-	-	IntronRetention	20.9827	201	239.256	2018	1362.94	0	101	0.0876995	0.0996036	AGGT-AGGC	46.1996
STRG.2997.1	2220	STRG.2997	SPBC6B1.05c	atg7	Reference	16.5231	14	20.4998	16	57.3122	0	649	0.806016	0.875	AGGT-AGTA/TTGT-AGTT/AGGT-AGTT/TGGT-AGTC/TGGT-AGTT/GGGT-AGAC	51.8312
STRG.2997.2	2216	STRG.2997	-	-	IntronRetention	3.97664	2	20.4998	16	57.3122	0	64	0.193984	0.125	TTGT-AGTT/AGGT-AGTT/TGGT-AGTC/TGGT-AGTT/GGGT-AGAC	81.36
STRG.3006.1	2108	STRG.3006	SPBC3E7.05c	mic60	Reference	59.3191	291	62.601	302	398.28	0	550	0.947575	0.963576	GTGT-AGTC/AGGT-AGAT	52.1982
STRG.3006.2	2077	STRG.3006	-	-	IntronRetention	3.28185	11	62.601	302	398.28	0	535	0.0524249	0.0364238	GTGT-AGTC	70.63
STRG.3042.1	996	STRG.3042	SPBC336.13c	mmp2	Reference	53.0726	204	67.8327	236	117.357	0	180	0.782404	0.864407	CGGT-AGCT/ATGT-AGTG	40.5421
STRG.3042.2	1063	STRG.3042	-	-	IntronRetention	14.7601	32	67.8327	236	117.357	0	131	0.217596	0.135593	CGGT-AGCT	44.6733
STRG.3079.1	2392	STRG.3079	SPBP19A11.07c	-	Reference	13.3114	50	15.202	59	68.3384	0	688	0.875632	0.847458	AAGT-AGAA/TTGT-AGTT/TGGT-AGGT/CGGT-AGAT/CTGT-AGGG/AGGT-AGGT/TGGT-AGAT/GGGT-AGTA	59.2437
STRG.3079.2	2387	STRG.3079	-	-	IntronRetention	1.89065	9	15.202	59	68.3384	0	583	0.124368	0.152542	AAGT-AGAA/TTGT-AGTT/TGGT-AGGT/CGGT-AGAT/CTGT-AGGG/AGGT-AGGT/TGGT-AGAT	83.1067
STRG.3081.1	3645	STRG.3081	-	-	IntronRetention	44.3543	23	51.2547	300	318.311	1	124	0.865369	0.0766667	AAGT-AGAT	39.9175
STRG.3081.2	2070	STRG.3081	SPBP4H10.04	ppb1	Reference	6.90045	277	51.2547	300	318.311	0	554	0.134631	0.923333	AAGT-AGAT/TGGT-AGTA	50.5118
STRG.3084.1	425	STRG.3084	SPBP4H10.08	qcr10	Reference	230.693	923	288.333	1197	4636.69	0	79	0.800094	0.771094	TCGT-AGTT/ACGT-AGTA/CGGT-AGTG/AGGT-AGCC	47.0669
STRG.3084.2	419	STRG.3084	-	-	IntronRetention	30.3246	107	288.333	1197	4636.69	0	45	0.105172	0.0893901	TCGT-AGTT/ACGT-AGTA/CGGT-AGGT	48.6001
STRG.3084.3	475	STRG.3084	-	-	IntronRetention	27.3151	167	288.333	1197	4636.69	3	54	0.0947344	0.139515	TCGT-AGTT/ACGT-AGTA/AGGT-AGCC	57.8892
STRG.3117.1	897	STRG.3117	SPBC2A9.09	plp2	Reference	245.1	866	269.444	973	896.131	0	233	0.909652	0.890031	TGGT-AGGA/TCGT-AGAC	38.9108
STRG.3117.2	960	STRG.3117	-	-	IntronRetention	24.3438	107	269.444	973	896.131	7	254	0.0903483	0.109969	TGGT-AGGA	52.5942
STRG.3125.1	1759	STRG.3125	-	-	IntronRetention	143.618	327	193.148	636	275.437	4	44	0.743563	0.514151	TGGT-AGCC	46.6947
STRG.3125.2	644	STRG.3125	SPBC2D10.07c	mmp1	Reference	49.5303	309	193.148	636	275.437	0	157	0.256437	0.485849	GGGT-AGTG/TGGT-AGCC	38.5676
STRG.3161.3	1319	STRG.3161	SPBC30D10.16	pha2	Reference	1.06134	5	95.8011	313	323.356	0	287	0.0110786	0.0159744	AGGT-AGGC	64.015
STRG.3182.1	3022	STRG.3182	-	-	IntronRetention	21.513	22	32.4755	25	56.0557	2	65	0.662437	0.88	AGGT-AGAG	43.5055
STRG.3182.2	3020	STRG.3182	SPBC21.02	rtc5	Reference	10.9625	3	32.4755	25	56.0557	0	511	0.337563	0.12	AGGT-AGAG/TTGT-AGCA	33.49
STRG.3187.3	2097	STRG.3187	SPBC21.07c	ppk24	Reference	0.871756	10	6.18662	12	30.4907	0	461	0.14091	0.833333	TGGT-AGAA	49.6125
STRG.3187.4	4093	STRG.3187	-	-	IntronRetention	0.55173	2	6.18662	12	30.4907	1	346	0.0891812	0.166667	AACG	63.95
STRG.3233.1	2053	STRG.3233	SPBC776.12c	hsk1	Reference	44.8036	221	47.7205	222	61.2078	0	507	0.938875	0.995495	AGGT-AGGT/CGGT-AGGT	54.5093
STRG.3233.2	1566	STRG.3233	-	-	IntronRetention	2.91691	1	47.7205	222	61.2078	1	87	0.0611248	0.0045045	CGGT-AGGT	NA
STRG.3245.1	2007	STRG.3245	SPBC25H2.12c	cct7	Reference	143.598	353	158.401	358	1760.61	0	558	0.906549	0.986034	TGGT-AGTA/GGGT-AGAA	45.6032
STRG.3245.2	2045	STRG.3245	-	-	IntronRetention	14.8027	5	158.401	358	1760.61	1	17	0.0934512	0.0139665	GGGT-AGAA	NA
STRG.3252.1	1070	STRG.3252	-	-	IntronRetention	524.813	14	579.882	2330	3560.09	0	71	0.905035	0.00600858	TGGT-AGAA	50.8237
STRG.3252.2	1014	STRG.3252	SPBC20F10.01	gar1	Reference	55.0686	2316	579.882	2330	3560.09	0	194	0.0949652	0.993991	TGGT-AGAA/AGGT-AGTC	38.7584
STRG.3254.1	1304	STRG.3254	SPBC20F10.04c	nse4	Reference	58.4841	217	72.8108	292	135.382	0	300	0.803234	0.743151	AGGT-AGAA/AGGT-AGTT/ATGT-AGGG/TGGT-AGCT/TGGT-AGAA/AGGT-AGAA	50.3614
STRG.3254.2	1351	STRG.3254	-	-	IntronRetention	8.30257	39	72.8108	292	135.382	0	287	0.114029	0.133562	AGGT-AGAA/AGGT-AGTT/ATGT-AGGG/TGGT-AGCT/TGGT-AGAA	60.356
STRG.3254.3	1349	STRG.3254	-	-	IntronRetention	6.02415	36	72.8108	292	135.382	0	247	0.0827371	0.123288	AGGT-AGAA/AGGT-AGTT/ATGT-AGGG/TGGT-AGCT/AGGT-AGAA	64.8992
STRG.3264.1	1587	STRG.3264	SPBC17D11.06	spp2	Reference	73.1635	251	78.7224	280	179.457	0	459	0.929386	0.896429	TGGT-AGTT/TCGT-AGTG/AAGT-AGGA	54.6419
STRG.3264.2	1726	STRG.3264	-	-	IntronRetention	5.55893	29	78.7224	280	179.457	0	121	0.0706143	0.103571	TGGT-AGTT/AAGT-AGGA	53.472
STRG.3267.2	4427	STRG.3267	-	-	IntronRetention	4.88168	0	84.2431	312	255.91	0	117	0.0579475	0	CGGT-AGGT/AGGT-AGGA	NA
STRG.3267.3	1861	STRG.3267	SPBC17D1.02	dph2	Reference	24.4391	312	84.2431	312	255.91	0	503	0.290102	1	CGGT-AGGT/CCGT-AGGA/AGGT-AGGA	44.8822
STRG.3341.1	3333	STRG.3341	SPBC1105.01	-	Reference	20.6578	95	21.7058	100	130.814	0	1001	0.951719	0.95	TGGT-AGAT/AGGT-AGCT	48.1103
STRG.3341.2	3243	STRG.3341	-	-	IntronRetention	1.04797	5	21.7058	100	130.814	0	1015	0.0482807	0.05	AGGT-AGCT	48.13
STRG.3348.1	1232	STRG.3348	SPBC1105.09	ubc15	Reference	47.7799	167	53.4637	203	398.834	0	167	0.893689	0.82266	AGGT-AGGA/AAGT-AGGA/AGGT-AGTT/TCGT-AGCA	49.9321
STRG.3348.2	1310	STRG.3348	-	-	IntronRetention	5.68376	36	53.4637	203	398.834	0	78	0.106311	0.17734	AGGT-AGGA/AGGT-AGTT/TCGT-AGCA	71.4908
STRG.3383.1	1160	STRG.3383	SPBC16D10.10	tad2	Reference	59.8356	68	106.141	346	381.443	0	245	0.563737	0.196532	AGGT-AGAC/ATGT-AGTT/CAGT-AGAC/TGGT-AGGC/CGGT-AGGG/GAGT-AGCC	42.6524
STRG.3383.2	1254	STRG.3383	-	-	IntronRetention	46.3054	278	106.141	346	381.443	0	251	0.436263	0.803468	AGGT-AGAC/ATGT-AGTT/CAGT-AGAC/CGGT-AGGG/GAGT-AGCC	52.2909
STRG.3393.1	1615	STRG.3393	SPBP8B7.07c	set6	Reference	30.6035	58	37.2566	73	141.022	0	483	0.821425	0.794521	TGGT-AGGA/AGGT-AGGG	41.8025
STRG.3393.2	1653	STRG.3393	-	-	IntronRetention	6.6531	15	37.2566	73	141.022	0	35	0.178575	0.205479	AGGT-AGGG	40.135
STRG.3394.1	1260	STRG.3394	SPBP8B7.08c	ppm1	Reference	23.8883	167	53.329	205	216.692	0	310	0.447943	0.814634	TTGT-AGTC/GGGT-AGAC/CTGT-AGGC	38.6372
STRG.3394.2	4505	STRG.3394	-	-	IntronRetention	29.4407	38	53.329	205	216.692	0	90	0.552057	0.185366	GGGT-AGAC/CTGT-AGGC	41.7313
STRG.3442.1	669	STRG.3442	-	-	IntronRetention	487.451	104	522.791	462	820.83	10	11	0.932401	0.225108	TGGT-AGTG/ATGT-AGGT/ATGT-AGGA/TGGT-AGTG	66.8184
STRG.3442.2	615	STRG.3442	SPBC31F10.12	tma20	Reference	35.3399	358	522.791	462	820.83	0	181	0.0675986	0.774892	CGGT-AGAT/TGGT-AGTG/ATGT-AGGT/ATGT-AGGA/TGGT-AGTG	37.6643
STRG.3485.1	1572	STRG.3485	SPBC1604.18c	cmp7	Reference	19.5086	57	22.6115	68	79.6064	0	449	0.862773	0.838235	CGGT-AGGC/AGGT-AGAT	50.7004
STRG.3485.2	1571	STRG.3485	-	-	IntronRetention	3.1029	11	22.6115	68	79.6064	0	118	0.137227	0.161765	AGGT-AGAT	68.5886
STRG.3490.1	637	STRG.3490	SPBC1604.10	srb7	Reference	268.624	921	359.058	1003	190.763	0	138	0.748137	0.918245	AGGT-AGGT/AGGT-AGTG/ATGT-AGTC	39.8952
STRG.3490.2	666	STRG.3490	-	-	IntronRetention	56.8884	11	359.058	1003	190.763	0	39	0.158438	0.0109671	AGGT-AGTG/ATGT-AGTC	43.757
STRG.3490.3	677	STRG.3490	-	-	IntronRetention	33.545	71	359.058	1003	190.763	0	62	0.0934251	0.0707876	AGGT-AGGT/AGGT-AGTG	45.4421
STRG.3497.2	1315	STRG.3497	SPBC1604.04	-	Reference	17.8159	53	36.0515	61	1075.98	0	283	0.494179	0.868852	CGGT-AGAT/AGGT-AGAG	52.8184
STRG.3497.3	1361	STRG.3497	-	-	IntronRetention	3.32848	8	36.0515	61	1075.98	1	33	0.0923255	0.131148	AGGT-AGAG	NA
STRG.3511.1	559	STRG.3511	SPBC26H8.14c	cox17	Reference	73.6615	543	127.913	729	1001.75	0	70	0.575874	0.744856	AGGT-AGCC/AAGT-AGAT	49.1527
STRG.3511.2	601	STRG.3511	-	-	IntronRetention	43.337	103	127.913	729	1001.75	0	61	0.338802	0.141289	AGGT-AGCC	55.3313
STRG.3511.3	631	STRG.3511	-	-	IntronRetention	10.914	83	127.913	729	1001.75	0	33	0.0853241	0.113855	AAGT-AGAT	68.0045
STRG.3516.1	2863	STRG.3516	SPBC26H8.09c	snf59	Reference	33.3704	92	35.0722	94	108.077	0	515	0.951479	0.978723	GACT	49.3069
STRG.3516.2	1863	STRG.3516	-	-	IntronInclusion	1.70174	2	35.0722	94	108.077	0	493	0.0485211	0.0212766	AGAA-AGAA	45.89
STRG.3523.2	2198	STRG.3523	-	-	IntronInclusion	23.7413	0	179.745	489	6137.69	0	203	0.132083	0	TGGT-AGAA	NA
STRG.3523.4	1763	STRG.3523	SPBC215.05	gpd1	Reference	35.838	489	179.745	489	6137.69	0	385	0.199382	1	AAAC	46.365
STRG.3523.5	1881	STRG.3523	-	-	IntronInclusion	27.8851	0	179.745	489	6137.69	0	203	0.155137	0	TGGT-AGAA	NA
STRG.3538.1	1438	STRG.3538	-	-	IntronRetention	5.38622	9	44.2826	106	203.091	0	20	0.121633	0.0849057	GGGT-AGAT	45.805
STRG.3538.2	1369	STRG.3538	SPBC3B9.11c	ctf1	Reference	38.8963	97	44.2826	106	203.091	0	363	0.878367	0.915094	TGGT-AGTT/GGGT-AGAT	48.5745
STRG.3548.1	3733	STRG.3548	-	-	IntronRetention	40.6615	38	177.885	1698	405.712	0	75	0.228583	0.0223793	AGGT-AGTC/AGGT-AGCC	75.1738
STRG.3548.2	1616	STRG.3548	SPBC215.02	pfd5	Reference	137.223	1660	177.885	1698	405.712	0	154	0.771417	0.977621	TGGT-AGGA/AGGT-AGTC/AGGT-AGCC	38.9568
STRG.3556.1	2173	STRG.3556	SPBC215.13	mtl3	Reference	6.48921	14	10.5162	19	616.621	0	534	0.617066	0.736842	AATT	54.5425
STRG.3556.2	2009	STRG.3556	-	-	IntronInclusion	4.02702	5	10.5162	19	616.621	0	360	0.382934	0.263158	CTCT-AGTC	48.196
STRG.3639.1	1207	STRG.3639	-	-	IntronRetention	41.5529	40	60.516	40	392.521	0	5	0.686644	1	AGGT-AGTA/ATGT-AGCA/GGGT-AGAT	64.7773
STRG.3639.2	1160	STRG.3639	SPBC16A3.09c	ufd1	Reference	18.9631	0	60.516	40	392.521	0	342	0.313356	0	TGGT-AGTT/AGGT-AGTA/ATGT-AGCA/GGGT-AGAT	NA
STRG.3640.1	1251	STRG.3640	SPBC16A3.08c	oga1	Reference	509.263	114	575.502	131	9971.92	0	284	0.884903	0.870229	AGGT-AGAA/GTGT-AGTG	38.6722
STRG.3640.2	1629	STRG.3640	-	-	IntronRetention	66.2384	17	575.502	131	9971.92	6	7	0.115097	0.129771	GTGT-AGTG	61.02
STRG.3645.1	2306	STRG.3645	SPBC543.03c	pku80	Reference	19.8859	42	29.8642	68	30.8177	0	695	0.665877	0.617647	AGGT-AGTT/TGGT-AGAT/ACGT-AGTG	58.1256
STRG.3645.2	2261	STRG.3645	-	-	IntronRetention	6.0101	15	29.8642	68	30.8177	0	65	0.201247	0.220588	AGGT-AGTT/ACGT-AGTG	68.7267
STRG.3645.3	2301	STRG.3645	-	-	IntronRetention	3.96822	11	29.8642	68	30.8177	0	65	0.132875	0.161765	AGGT-AGTT	99.4267
STRG.3655.1	1260	STRG.3655	SPBC16C6.03c	rsa1	Reference	38.055	168	48.6263	225	106.565	0	207	0.782601	0.746667	AAGT-AGGA/AGGT-AGTT	37.641
STRG.3655.2	1278	STRG.3655	-	-	IntronRetention	10.5713	57	48.6263	225	106.565	0	141	0.217399	0.253333	AGGT-AGTT	41.4864
STRG.3697.1	2433	STRG.3697	SPBC1539.05	cog3	Reference	28.7432	76	32.7772	87	104.233	0	735	0.876925	0.873563	AAGT-AGCT/AGGT-AGAT/ATGT-AGTT/TGGT-AGGA/ATGT-AGAT/ATGT-AGTC	61.1581
STRG.3697.2	2428	STRG.3697	-	-	IntronRetention	4.03405	11	32.7772	87	104.233	0	344	0.123075	0.126437	AAGT-AGCT/AGGT-AGAT/ATGT-AGTT/TGGT-AGGA/ATGT-AGTC	72.2029
STRG.3700.1	1071	STRG.3700	SPBC1539.08	arf6	Reference	92.7284	296	118.631	426	356.661	0	184	0.781654	0.694836	GAGT-AGCT/AGGT-AGTG/GGGT-AGGA/AGGT-AGCT	45.9891
STRG.3700.2	1047	STRG.3700	-	-	IntronRetention	17.444	59	118.631	426	356.661	0	73	0.147044	0.138498	GAGT-AGCT/AGGT-AGTG/AGGT-AGCT	66.1817
STRG.3700.3	1425	STRG.3700	-	-	IntronRetention	8.45867	71	118.631	426	356.661	3	50	0.0713023	0.166667	AGGT-AGCT	67.3412
STRG.3703.1	1470	STRG.3703	-	-	IntronRetention	79.5783	102	105.138	135	168.457	23	38	0.756895	0.755556	CAGT-AGGC	56.9171
STRG.3703.2	1408	STRG.3703	SPBC1289.02c	uap2	Reference	25.5595	33	105.138	135	168.457	0	367	0.243105	0.244444	ATGT-AGGA/CAGT-AGGC	42.0532
STRG.3708.1	540	STRG.3708	SPBC1289.05c	vma10	Reference	221.517	933	316.426	1148	2960.15	0	108	0.70006	0.812718	TGGT-AGAG/AGGT-AGGC/ACGT-AGAT/AGGT-AGGC	39.7048
STRG.3708.2	686	STRG.3708	-	-	IntronRetention	52.4702	194	316.426	1148	2960.15	4	12	0.165821	0.16899	AGGT-AGGC	61.1273
STRG.3708.3	587	STRG.3708	-	-	IntronRetention	42.4385	21	316.426	1148	2960.15	0	12	0.134118	0.0182927	AGGT-AGGC/ACGT-AGAT/AGGT-AGGC	60.5939
STRG.3754.1	2677	STRG.3754	-	-	IntronInclusion	14.8767	2	204.417	917	1449.86	0	529	0.0727761	0.00218103	TGGT-TCGT	NA
STRG.3754.2	2217	STRG.3754	SPCC1235.14	ght5	Reference	189.541	915	204.417	917	1449.86	0	546	0.927224	0.997819	AGAT	52.4899
STRG.3819.1	2791	STRG.3819	SPCC736.12c	mmi1	Reference	12.2153	8	14.5603	12	283.864	0	488	0.838945	0.666667	GCGT-AGCT/CCGT-AGGC/AGGT-AGAA/ACGT-AGTT	86.5675
STRG.3819.2	2868	STRG.3819	-	-	IntronRetention	2.34502	4	14.5603	12	283.864	0	30	0.161055	0.333333	CCGT-AGGC/AGGT-AGAA/ACGT-AGTT	18.46
STRG.3828.1	401	STRG.3828	-	-	IntronRetention	229.594	228	423.302	341	2438.72	0	27	0.542389	0.668622	ATGT-AGTG/GGGT-AGTT	49.0778
STRG.3828.2	656	STRG.3828	SPCC1682.01	qcr9	Reference	106.266	39	423.302	341	2438.72	0	85	0.25104	0.11437	TGGT-AGGC/ATGT-AGTG/GGGT-AGTT	46.6427
STRG.3828.3	787	STRG.3828	-	-	IntronRetention	87.442	74	423.302	341	2438.72	0	27	0.206571	0.217009	ATGT-AGTG	64.7023
STRG.3844.1	1478	STRG.3844	-	-	IntronInclusion	46.535	117	91.7679	601	58.5867	0	220	0.507094	0.194676	TTGT-AGTT/CTGT-ATGT	49.4481
STRG.3844.2	1532	STRG.3844	SPCC1682.06	-	Reference	39.106	435	91.7679	601	58.5867	0	238	0.42614	0.723794	TTGT-AGTT	49.6374
STRG.3844.3	1523	STRG.3844	-	-	IntronRetention	6.12695	49	91.7679	601	58.5867	0	135	0.0667657	0.0815308	CTGT-ATGT	53.8797
STRG.3908.1	1660	STRG.3908	SPCC1183.03c	fxn1	Reference	99.4011	358	104.89	423	889.92	0	158	0.947667	0.846336	CTGT-AGAA/AGGT-AGTG	36.3912
STRG.3908.2	844	STRG.3908	-	-	IntronRetention	5.48925	65	104.89	423	889.92	1	100	0.0523333	0.153664	AGGT-AGTG	40.09
STRG.3932.1	428	STRG.3932	SPCC16C4.20c	hap2	Reference	198.658	928	244.296	999	561.141	0	77	0.813186	0.928929	AGGT-AGGT/AGGT-AGAG	48.378
STRG.3932.2	227	STRG.3932	-	-	IntronRetention	45.6379	71	244.296	999	561.141	4	18	0.186814	0.0710711	AGGT-AGAG	NA
STRG.3954.1	1004	STRG.3954	SPCC16C4.16c	cbc3	Reference	162.755	762	181.62	768	314.963	0	206	0.896132	0.992188	ATGT-AGGC/AGGT-AGTA	50.2012
STRG.3954.2	793	STRG.3954	-	-	IntronRetention	18.8646	6	181.62	768	314.963	4	82	0.103868	0.0078125	AGGT-AGTA	110.26
STRG.3958.1	1559	STRG.3958	SPCC18B5.06	dom34	Reference	55.9643	166	74.2533	232	219.109	0	390	0.753695	0.715517	TGGT-AGGC/CGGT-AGTC/AGGT-AGGT/AGGT-AGGG	51.151
STRG.3958.2	1575	STRG.3958	-	-	IntronRetention	18.289	66	74.2533	232	219.109	0	55	0.246305	0.284483	TGGT-AGGC/AGGT-AGGT/AGGT-AGGG	61.9406
STRG.4008.1	2429	STRG.4008	-	-	IntronRetention	0.617111	2	6.79196	18	32.661	0	123	0.0908591	0.111111	AGGT-AGAA	74.59
STRG.4008.2	2180	STRG.4008	SPCC16A11.08	atg20	Reference	5.14103	12	6.79196	18	32.661	0	534	0.75693	0.666667	AGGT-AGAA/TTGT-AGTA	82.8856
STRG.4008.3	2184	STRG.4008	-	-	IntronRetention	1.03381	4	6.79196	18	32.661	3	78	0.152211	0.222222	TTGT-AGTA	76.7367
STRG.4022.1	1860	STRG.4022	-	-	IntronRetention	51.7638	4	79.4154	261	189.267	0	5	0.65181	0.0153257	TCGT-AGAA/GAGT-AGAT	66.1
STRG.4022.2	1629	STRG.4022	SPCC24B10.11c	tho7	Reference	27.6516	257	79.4154	261	189.267	0	202	0.34819	0.984674	GGGT-AGAG/TCGT-AGAA/GAGT-AGAT	43.4895
STRG.4046.1	1813	STRG.4046	SPCC1259.10	pgp1	Reference	3.37473	55	6.96932	79	55.4168	0	412	0.484227	0.696203	GTGT-AGCG/TGGT-AGCA	45.7858
STRG.4046.2	3471	STRG.4046	-	-	IntronRetention	3.59458	24	6.96932	79	55.4168	1	2	0.515773	0.303797	GTGT-AGCG	75.7471
STRG.4071.1	1644	STRG.4071	SPCC825.05c	pwi1	Reference	29.086	117	39.113	124	192.504	0	301	0.743641	0.943548	AGGT-AGGG/AGGT-AGGT/AAGT-AGGA	53.546
STRG.4071.2	1398	STRG.4071	-	-	IntronRetention	10.027	7	39.113	124	192.504	1	29	0.256359	0.0564516	AAGT-AGGA	70.806
STRG.4091.1	852	STRG.4091	SPCC4B3.02c	got1	Reference	124.464	358	162.163	495	164.441	0	129	0.767525	0.723232	GAGT-AGAA/TGGT-AGGG/ATGT-AGTT	42.2903
STRG.4091.2	932	STRG.4091	-	-	IntronRetention	14.7922	43	162.163	495	164.441	0	44	0.0912179	0.0868687	GAGT-AGAA/ATGT-AGTT	61.17
STRG.4091.3	897	STRG.4091	-	-	IntronRetention	11.5515	45	162.163	495	164.441	0	15	0.071234	0.0909091	TGGT-AGGG/ATGT-AGTT	57.0856
STRG.4091.4	977	STRG.4091	-	-	IntronRetention	11.3552	49	162.163	495	164.441	0	15	0.0700231	0.0989899	ATGT-AGTT	74.43
STRG.4093.1	2504	STRG.4093	SPCP25A2.03	tho1	Reference	17.5442	29	29.3223	53	133.402	0	752	0.598323	0.54717	CAGT-AGCG/ATGT-AGAC	51.5338
STRG.4093.2	2505	STRG.4093	-	-	IntronRetention	9.2257	17	29.3223	53	133.402	2	78	0.314631	0.320755	ATGT-AGAC	48.109
STRG.4093.3	2501	STRG.4093	-	-	IntronRetention	2.55239	7	29.3223	53	133.402	2	377	0.0870461	0.132075	CAGT-AGCG	49.225
STRG.4104.1	1601	STRG.4104	SPCC550.12	arp6	Reference	22.4038	82	24.0937	82	106.809	0	401	0.929861	1	GTGT-AGTG/AGGT-AGGG	46.8375
STRG.4104.2	479	STRG.4104	-	-	IntronRetention	1.68991	0	24.0937	82	106.809	0	27	0.0701389	0	AGGT-AGGG	NA
STRG.4142.1	1759	STRG.4142	-	-	IntronRetention	6.53934	21	89.2038	296	129.213	0	180	0.0733078	0.0709459	AGGT-AGTA	58.4493
STRG.4142.2	1677	STRG.4142	SPCC132.02	hst2	Reference	82.6644	275	89.2038	296	129.213	0	332	0.926692	0.929054	AGGT-AGTA/TGGT-AGGC	55.2724
STRG.4143.2	1354	STRG.4143	-	-	IntronRetention	32.9195	132	105.947	428	115.723	0	80	0.310718	0.308411	TTGT-AGTC	62.0639
STRG.4143.3	1119	STRG.4143	SPCC132.03	-	Reference	3.91645	296	105.947	428	115.723	0	176	0.0369663	0.691589	TGGT-AGTG/TTGT-AGTC	56.2199
STRG.4202.1	5109	STRG.4202	-	-	IntronRetention	15.2151	17	35.7284	55	107.665	0	19	0.425855	0.309091	TGGT-AGTT	63.1767
STRG.4202.2	2373	STRG.4202	SPCC584.15c	-	Reference	20.5133	38	35.7284	55	107.665	0	594	0.574145	0.690909	CGGT-AGGC/TGGT-AGTT	57.024
STRG.4216.1	2452	STRG.4216	SPCC162.07	ent1	Reference	67.356	224	75.9744	256	825.892	0	702	0.886561	0.875	GTGT-AGAA	48.8031
STRG.4216.2	2398	STRG.4216	-	-	IntronInclusion	8.61847	32	75.9744	256	825.892	0	460	0.113439	0.125	GTGT-AGAA/GCGT-AGCG	47.9273
STRG.4229.1	3285	STRG.4229	-	-	IntronInclusion	2.52872	4	29.7231	160	753.045	0	813	0.0850759	0.025	TGGT-AGAC/TCGT-AGAA	18.45
STRG.4229.2	3394	STRG.4229	SPCC663.01c	ekc1	Reference	27.1944	156	29.7231	160	753.045	0	838	0.914924	0.975	TCGT-AGAA	47.1217
STRG.4230.1	1963	STRG.4230	SPCC663.02	wtf14	Reference	71.9804	267	75.8651	283	132.052	0	229	0.948794	0.943463	AGGT-AGTG/CGGT-AGCA/TGGT-AGAA/GGGT-AGAT	51.1371
STRG.4230.2	2034	STRG.4230	-	-	IntronRetention	3.88471	16	75.8651	283	132.052	0	65	0.0512055	0.0565371	CGGT-AGCA/TGGT-AGAA/GGGT-AGAT	60.852
STRG.4305.1	1371	STRG.4305	SPCC285.08	ret2	Reference	123.533	517	155.456	529	688.512	0	240	0.794651	0.977316	TGGT-AGGT/AGGT-AGCC/GAGT-AGAA	42.1682
STRG.4305.2	1038	STRG.4305	-	-	IntronRetention	19.7819	12	155.456	529	688.512	0	20	0.127251	0.0226843	GAGT-AGAA	19.64
STRG.4305.3	994	STRG.4305	-	-	IntronRetention	12.1409	0	155.456	529	688.512	0	41	0.0780984	0	TGGT-AGGT/GAGT-AGAA	NA
STRG.4341.1	2492	STRG.4341	SPCC737.07c	-	Reference	20.5724	47	28.0029	81	86.6542	0	660	0.734652	0.580247	GGGT-AGAT/ACGT-AGAA/GTGT-AGCG	51.1291
STRG.4341.2	2580	STRG.4341	-	-	IntronRetention	7.43052	34	28.0029	81	86.6542	0	74	0.265348	0.419753	GGGT-AGAT	58.2339
STRG.4373.2	7633	STRG.4373	-	-	IntronRetention	8.21475	13	44.4348	139	0	5	25	0.184872	0.0935252	AAAA	68.762
STRG.4373.3	2863	STRG.4373	SPCC18.09c	hnt3	Reference	6.68457	126	44.4348	139	0	0	232	0.150435	0.906475	TTGT-AGTC	51.3371
STRG.4384.1	2153	STRG.4384	SPCC1739.15	wtf21	Reference	0.937631	47	6.42439	199	11.1274	0	329	0.145949	0.236181	AGGT-AGAT/TTGT-AGAC/TGGT-AGTT/GGGT-AGAA/AGGT-AGGA	58.7129
STRG.4384.2	2271	STRG.4384	-	-	IntronRetention	3.94136	139	6.42439	199	11.1274	0	52	0.6135	0.698492	TTGT-AGAT/GGGT-AGAA	67.8358
STRG.4384.3	2417	STRG.4384	-	-	IntronRetention	1.54539	13	6.42439	199	11.1274	0	212	0.240551	0.0653266	AGGT-AGAT/TTGT-AGAC/GGGT-AGGA	62.46
STRG.4387.1	1358	STRG.4387	SPCC1739.04c	dms1	Reference	36.6401	113	43.3331	139	153.144	0	274	0.845547	0.81295	AGGT-AGAT/GAGT-AGAA/ATGT-AGTC	57.9933
STRG.4387.2	1404	STRG.4387	-	-	IntronRetention	6.69294	26	43.3331	139	153.144	0	129	0.154453	0.18705	AGGT-AGAT/ATGT-AGTC	57.8333
STRG.4408.1	3107	STRG.4408	SPCC576.05	sac3	Reference	16.4711	117	18.3508	122	63.6303	0	1024	0.897565	0.959016	AGGT-AGAA/TAGT-AGTA/TGGT-AGAT	52.1508
STRG.4408.2	2092	STRG.4408	-	-	IntronRetention	1.87977	5	18.3508	122	63.6303	0	170	0.102435	0.0409836	TAGT-AGTA/TGGT-AGAT	NA
STRG.4421.1	1350	STRG.4421	SPCC126.06	twf1	Reference	64.553	147	76.2986	173	503.119	0	328	0.846057	0.849711	ACGT-AGCT/TGGT-AGAG/AGGT-AGTC/TGGT-AGTC/TTGT-AGTG/AGGT-AGAT	48.5135
STRG.4421.2	1362	STRG.4421	-	-	IntronRetention	11.7456	26	76.2986	173	503.119	0	13	0.153943	0.150289	TGGT-AGAG/AGGT-AGTC/TGGT-AGTC/TTGT-AGTG/AGGT-AGAT	72.2013
STRG.4425.1	1212	STRG.4425	SPCC126.11c	-	Reference	167.272	877	180.673	911	548.442	0	183	0.92583	0.962678	AGGT-AGCA/CCGT-AGGG	40.6044
STRG.4425.2	1261	STRG.4425	-	-	IntronRetention	13.4004	34	180.673	911	548.442	0	19	0.0741697	0.0373216	CCGT-AGGG	62.9946
STRG.4428.1	2523	STRG.4428	SPCC126.14	prp18	Reference	39.9448	84	74.9586	84	52.4097	0	343	0.532892	1	AGGT-AGTG	44.5115
STRG.4428.2	1675	STRG.4428	-	-	IntronInclusion	35.0138	0	74.9586	84	52.4097	0	147	0.467108	0	AGGT-AGTG	NA
STRG.4520.1	1840	STRG.4520	SPCC569.01c	-	Reference	0.682366	279	1.63263	297	156.6	0	323	0.417956	0.939394	GAAT	46.0476
STRG.4520.2	1681	STRG.4520	-	-	IntronInclusion	0.950262	18	1.63263	297	156.6	0	5	0.582044	0.0606061	AACG-AGCG	57.426
STRG.4547.1	1526	STRG.4547	SPCC569.03	-	Reference	8.65497	166	24.634	268	0	0	375	0.351343	0.619403	AGGT-AGGT	37.0729
STRG.4547.2	998	STRG.4547	-	-	IntronRetention	5.22491	0	24.634	268	0	0	13	0.212102	0	GGGT-AGAT	NA
STRG.4547.3	1392	STRG.4547	-	-	IntronRetention	6.13581	98	24.634	268	0	0	16	0.249079	0.365672	TGTC-TGTC	41.1165
STRG.4547.4	1317	STRG.4547	-	-	IntronRetention	4.61828	4	24.634	268	0	0	106	0.187476	0.0149254	GGGT-AGAT	38.34
STRG.89.1	535	STRG.89	SPAC18B11.08c	-	Reference	101.894	431	124.391	592	1967.37	0	95	0.819146	0.728041	AGGT-AGTT/AAGT-AGAT/TTGT-AGTA/CGGT-AGCA	50.3129
STRG.89.2	526	STRG.89	-	-	AlternativeSplicingSite	22.4967	161	124.391	592	1967.37	0	74	0.180854	0.271959	AGGT-AGTT/AAGT-AGAT/ATGT-AGCA	52.6044
STRG.566.1	3462	STRG.566	SPAC167.01	ire1	Reference	5.67608	81	12.861	83	66.8349	0	1072	0.441341	0.975904	AGGT-AGAG	63.6458
STRG.566.2	3991	STRG.566	-	-	AlternativeSplicingSite	7.18489	2	12.861	83	66.8349	0	1059	0.558659	0.0240964	ATTC-AGAG	NA
STRG.1733.1	1384	STRG.1733	SPAC17D4.01	pex7	Reference	79.1362	218	84.1596	225	749.633	0	308	0.940311	0.968889	AGGT-AGGT/CAGT-AGCT	50.62
STRG.1733.2	1570	STRG.1733	-	-	AlternativeSplicingSite	5.02339	7	84.1596	225	749.633	13	39	0.0596889	0.0311111	AGGT-AGAA/CAGT-AGCT	66.1783
STRG.2699.1	2153	STRG.2699	-	-	AlternativeSplicingSite	157.125	161	165.151	619	817.496	0	298	0.951399	0.260097	ATGT-AGAC	39.176
STRG.2699.2	2088	STRG.2699	SPBC3H7.15	hhp1	Reference	8.02656	458	165.151	619	817.496	0	365	0.0486013	0.739903	AGGT-AGAC	45.6336
STRG.2902.1	1984	STRG.2902	SPBC19G7.17	sec6102	Reference	68.1162	225	72.0888	231	1257.79	0	475	0.944893	0.974026	AGGT-AGCT/ATGT-AGCT/AAGT-AGTA/TCGT-AGTG/AGGT-AGTT	58.1807
STRG.2902.2	1912	STRG.2902	-	-	AlternativeSplicingSite	3.97263	6	72.0888	231	1257.79	0	75	0.0551075	0.025974	AGGT-AGCT/ATGT-AGCT/TTGT-AGTG/AGGT-AGTT	59.37
STRG.3002.1	2125	STRG.3002	SPBC6B1.09c	nbs1	Reference	7.43202	6	13.5733	21	55.3223	0	613	0.547547	0.285714	AGGT-AGGA/TGGT-AGAC/ACGT-AGTT/AAGT-AGTG/AGGT-AGGT/AGGT-AGAA	55.9233
STRG.3002.2	2109	STRG.3002	-	-	IntronRetention	3.62399	12	13.5733	21	55.3223	1	16	0.266994	0.571429	TGGT-AGAC/ACGT-AGTT/AAGT-AGTG/AGGT-AGGT/AGGT-AGAA	71.974
STRG.3002.3	2008	STRG.3002	-	-	AlternativeSplicingSite	1.51997	2	13.5733	21	55.3223	0	110	0.111982	0.0952381	AGGT-AGGA/TGGT-AGAC/ACGT-AGTT/AAGT-AGGT/AGGT-AGAA	NA
STRG.3002.4	1982	STRG.3002	-	-	AlternativeSplicingSite	0.997321	1	13.5733	21	55.3223	0	110	0.0734767	0.047619	AGGT-AGGA/TGGT-AGAC/ACGT-AGTT/AAGT-AGGT/CCGT-AGAA	NA
STRG.3107.1	939	STRG.3107	SPBC1703.10	ypt1	Reference	708.18	1870	788.163	2070	3088.69	0	203	0.89852	0.903382	GAGT-AGAT/TTGT-AGAA/TCGT-AGTG/AGGT-AGAT	43.7469
STRG.3107.2	1039	STRG.3107	-	-	AlternativeSplicingSite	79.9825	200	788.163	2070	3088.69	0	10	0.10148	0.0966184	GAGT-AGAG/TTGT-AGAA/TCGT-AGTG/AGGT-AGAT	62.4203
STRG.3136.1	454	STRG.3136	SPBC2D10.19c	alb1	Reference	548.673	2778	620.058	2876	919.092	0	105	0.884875	0.965925	ATGT-AGTC/GGGT-AGAG	38.1177
STRG.3136.2	450	STRG.3136	-	-	AlternativeSplicingSite	71.3844	98	620.058	2876	919.092	0	53	0.115125	0.0340751	ATGT-AGGA	36.2718
STRG.3161.1	1274	STRG.3161	-	-	IntronInclusion	89.6817	300	95.8011	313	323.356	0	272	0.936124	0.958466	AGGT-AGGC/AGGC-AGCT	49.886
STRG.3161.2	1264	STRG.3161	-	-	AlternativeSplicingSite	5.05804	8	95.8011	313	323.356	0	20	0.0527973	0.0255591	AGGT-AGGC	41.02
STRG.3225.1	1741	STRG.3225	SPBC776.05	gpc1	Reference	7.69748	34	10.1296	37	94.4141	0	403	0.759903	0.918919	AGGT-AGTT/AGGT-AGGT/TGGT-AGCT/ATGT-AGTG/GCGT-AGTT/CAGT-AGTT	68.4614
STRG.3225.2	1612	STRG.3225	-	-	AlternativeSplicingSite	1.48263	1	10.1296	37	94.4141	0	334	0.146366	0.027027	AGGT-AGTT/AGGT-AGGT/TGGT-AGCT/ATGT-AGTG/GCGT-AGTT/CAGT-AGTT	38.07
STRG.3225.3	1385	STRG.3225	-	-	AlternativeSplicingSite	0.949449	2	10.1296	37	94.4141	0	151	0.0937306	0.0540541	AGGT-AGTT/GCGT-AGCT/ATGT-AGTG/GCGT-AGTT/CAGT-AGTT	62.2
STRG.4018.1	1377	STRG.4018	SPCC24B10.06	-	Reference	33.2775	128	41.1647	162	541.929	0	156	0.808398	0.790123	CAGT-AGCT/TTGT-AGTC	59.9771
STRG.4018.2	1300	STRG.4018	-	-	AlternativeSplicingSite	7.88722	34	41.1647	162	541.929	0	68	0.191602	0.209877	CAGT-AGCT/AGGC-AGTC	60.747
STRG.4164.1	3632	STRG.4164	SPCC1281.08	wtf11	Reference	2.63407	12	6.92686	19	0	0	264	0.380268	0.631579	AGGT-AGCT/GCGT-AGGC/ATGT-AGTA/TGGT-AGGT	63.1933
STRG.4164.2	3613	STRG.4164	-	-	AlternativeSplicingSite	2.39445	7	6.92686	19	0	0	258	0.345677	0.368421	AGGT-AGCT/GCGT-AGGC/ATGT-AGGT	56.85
STRG.4231.1	1520	STRG.4231	SPCC663.17	wtf15	Reference	4.1245	12	10.9221	43	13.86	0	255	0.37763	0.27907	AGGT-AGAT/TTGT-AGAC/AGGT-AGTA/ATGT-AGCT	78.3575
STRG.4231.2	1486	STRG.4231	-	-	AlternativeSplicingSite	2.66112	1	10.9221	43	13.86	0	211	0.243646	0.0232558	AGGT-AGAT/TTGT-AGAC/CTGT-AGTA/ATGT-AGCT	58.65
STRG.4231.3	1764	STRG.4231	-	-	IntronRetention	1.07662	8	10.9221	43	13.86	0	51	0.0985724	0.186047	TTGT-AGAC/ATGT-AGCT	77.2443
STRG.4231.4	1465	STRG.4231	-	-	AlternativeSplicingSite	0.990056	0	10.9221	43	13.86	0	203	0.0906473	0	AGGT-AGAT/CGGT-AGAC/CAGT-AGCT	NA
STRG.4231.5	1626	STRG.4231	-	-	IntronRetention	0.798577	5	10.9221	43	13.86	0	157	0.0731159	0.116279	AGGT-AGAT/AGGT-AGTA	60.395
STRG.4231.6	1501	STRG.4231	-	-	AlternativeSplicingSite	0.676829	14	10.9221	43	13.86	0	215	0.0619689	0.325581	AGGT-AGAT/TTGT-AGAC/CAGT-AGCT	56.459
STRG.4231.7	1502	STRG.4231	-	-	AlternativeSplicingSite	0.594374	3	10.9221	43	13.86	0	239	0.0544195	0.0697674	AGGT-AGAT/TTGT-AGAC/AGGT-AGAT	48.38
STRG.4371.1	1978	STRG.4371	-	-	IntronRetention	2.72397	3	40.104	194	29.8613	0	228	0.0679227	0.0154639	AGGT-AGAA/GTGT-AGGT/TGGT-AGTT/GGGT-AGAA	105.245
STRG.4371.2	1884	STRG.4371	-	-	AlternativeSplicingSite	7.70408	4	40.104	194	29.8613	0	368	0.192102	0.0206186	AGGT-AGAA/GTGT-AGTT/TGGT-AGTT/GGGT-AGAA/AGGT-AGAA	51.98
STRG.4371.3	1818	STRG.4371	-	-	AlternativeSplicingSite	5.0558	2	40.104	194	29.8613	0	346	0.126067	0.0103093	AGGT-AGAA/GTGT-AGTT/TGGT-AGTT/GGGT-AGAA/AGGT-AGAA	33.22
STRG.4371.4	1732	STRG.4371	-	-	IntronRetention	4.76361	19	40.104	194	29.8613	0	330	0.118781	0.0979381	AGGT-AGAA/GTGT-AGAC/AGGT-AGGT/TGGT-AGTT/GGGT-AGAA	49.744
STRG.4371.5	1960	STRG.4371	-	-	ExonSkiping	4.19843	11	40.104	194	29.8613	0	177	0.104689	0.056701	AGGT-AGAA/GTGT-AGAC	38.3233
STRG.4371.6	1943	STRG.4371	-	-	IntronRetention	3.34972	32	40.104	194	29.8613	0	352	0.0835256	0.164948	AGGT-AGAA/GTGT-AGAC/AGGT-AGTT/TGGT-AGTT/GGGT-AGAA	63.0093
STRG.4371.7	1970	STRG.4371	-	-	IntronRetention	3.3617	22	40.104	194	29.8613	0	258	0.0838245	0.113402	AGGT-AGAA/GTGT-AGTT/GGGT-AGAA	54.5875
STRG.4371.8	1934	STRG.4371	-	-	IntronRetention	3.13957	9	40.104	194	29.8613	0	349	0.0782856	0.0463918	AGGT-AGAA/GTGT-AGTT/TGGT-AGTT/GGGT-AGAA	61.016
STRG.4371.9	1814	STRG.4371	SPCC1906.03	wtf19	Reference	2.39254	45	40.104	194	29.8613	0	393	0.0596583	0.231959	AGGT-AGAA/GTGT-AGAC/TGGT-AGTT/GGGT-AGAA/AGGT-AGAA	68.6136
STRG.4371.10	1894	STRG.4371	-	-	IntronRetention	2.37681	42	40.104	194	29.8613	0	236	0.0592661	0.216495	AGGT-AGAA/GTGT-AGTT/AGGT-AGAA	64.3967
STRG.4371.11	1494	STRG.4371	SPCC1906.03	wtf19	Reference	1.03781	5	40.104	194	29.8613	0	13	0.0258778	0.0257732	GTGT-AGAC/TGGT-AGTT/GGGT-AGAA/AGGT-AGAA	116.325
STRG.388.1	866	STRG.388	SPAC30D11.13	hus5	Reference	62.8586	272	71.0343	287	515.005	0	157	0.884906	0.947735	TTGT-AGGG/AGGT-AGAA/ATGT-AGGT/AGGT-AGAT/AAGT-AGAA	52.3054
STRG.388.2	800	STRG.388	-	-	ExonSkiping	8.17563	15	71.0343	287	515.005	0	149	0.115094	0.0522648	TTGT-AGGG/AGGT-AGGT/AGGT-AGAT/AAGT-AGAA	54.374
STRG.1606.1	2010	STRG.1606	SPAC29E6.01	pof11	Reference	22.5018	56	24.6668	61	58.7802	0	506	0.912231	0.918033	TGGT-AGAC/AAGT-AGGT	56.21
STRG.1606.2	1893	STRG.1606	-	-	ExonSkiping	2.16498	5	24.6668	61	58.7802	0	45	0.0877692	0.0819672	TGGT-AGGT	40.1567
STRG.2441.1	1173	STRG.2441	SPBC1709.04c	cyp3	Reference	21.9418	587	102.61	588	259.07	0	173	0.213836	0.998299	ATGT-AGAT/AAGT-AGGA/AGGT-AGAC/CGGT-AGGT/GTGT-AGGG	44.3093
STRG.2441.2	815	STRG.2441	-	-	ExonSkiping	57.1903	0	102.61	588	259.07	0	111	0.557355	0	ATGT-AGAT/AAGT-AGAC/CGGT-AGGT/GTGT-AGGG	NA
STRG.2441.4	885	STRG.2441	-	-	IntronRetention	8.4159	1	102.61	588	259.07	0	38	0.0820182	0.00170068	ATGT-AGAT/AAGT-AGGA/CGGT-AGGT/GTGT-AGGG	NA
STRG.2712.1	1310	STRG.2712	SPBP16F5.02	mcs2	Reference	47.7695	178	50.7403	181	136.5	0	322	0.94145	0.983425	GCGT-AGTC/TCGT-AGGT	52.3609
STRG.2712.2	1236	STRG.2712	-	-	ExonSkiping	2.97086	3	50.7403	181	136.5	0	108	0.0585503	0.0165746	GCGT-AGGT	67.675
STRG.2793.1	894	STRG.2793	SPBC23G7.16	ctr6	Reference	136.49	648	197.862	705	349.311	0	148	0.689821	0.919149	AGGT-AGAT/AAGT-AGCT/ATGT-AGGT/ACGT-AGGC	51.399
STRG.2793.2	869	STRG.2793	-	-	ExonSkiping	61.3728	57	197.862	705	349.311	0	136	0.310179	0.0808511	AGGT-AGAT/AAGT-AGCT/ATGT-AGGC	54.6643
STRG.3273.1	2016	STRG.3273	SPBC11C11.01	-	Reference	42.3704	55	50.4064	94	57.3003	0	466	0.840575	0.585106	GAGT-AGAG/ATGT-AGAG/AAGT-AGAA/AGGT-AGTC/AGGT-AGAT/AGGT-AGTT	67.4517
STRG.3273.2	1868	STRG.3273	-	-	IntronRetention	5.18714	33	50.4064	94	57.3003	0	42	0.102906	0.351064	GAGT-AGAG/AAGT-AGAA/AGGT-AGTC/AGGT-AGAT/AGGT-AGTT	58.3414
STRG.3273.3	1765	STRG.3273	-	-	ExonSkiping	2.84892	6	50.4064	94	57.3003	0	22	0.0565189	0.0638298	GAGT-AGAG/AAGT-AGAA/AGGT-AGTC/AGGT-AGAT/AGGT-AGTT	48.23
STRG.3380.1	2159	STRG.3380	SPBC16D10.07c	sir2	Reference	60.5142	178	64.9144	215	106.644	0	475	0.932214	0.827907	AGGT-AGAA/AGGT-AGGC/TGGT-AGCC/GAGT-AGTT/TGGT-AGGG	48.2947
STRG.3380.2	2127	STRG.3380	-	-	ExonSkiping	4.40027	37	64.9144	215	106.644	0	121	0.0677856	0.172093	AGGT-AGAA/AGGT-AGGC/TGGT-AGTT/TGGT-AGGG	55.9029
STRG.4457.1	1103	STRG.4457	SPCC830.10	ham1	Reference	134.182	566	153.25	566	652.487	0	188	0.875577	1	AAGT-AGTA/TTGT-AGTA/TTGT-AGGT/GTGT-AGGA/TGGT-AGGA/AGGT-AGCC	48.6861
STRG.4457.2	974	STRG.4457	-	-	ExonSkiping	19.0679	0	153.25	566	652.487	0	91	0.124423	0	AAGT-AGTA/TTGT-AGTA/TTGT-AGGT/GTGT-AGGA/AGGT-AGCC	NA

## Sheet: Retained_intron_RiboSeq
Transcript	Transcript_length_nt	Gene	Ref_gene	Gene_name	Isoform_type	TPM (Stringtie)	Counts RiboSeq intron	AA_length
STRG.154.1	632	STRG.154	-	-	IntronRetention	67.2025	6	14
STRG.154.2	932	STRG.154	SPAC227.10	pfd2	Reference	80.5323	0	114
STRG.573.2	1103	STRG.573	-	-	IntronRetention	35.6364	11	55
STRG.573.3	1057	STRG.573	SPAC23H4.16c	not11	Reference	29.6378	0	328
STRG.824.1	2725	STRG.824	-	-	IntronRetention	6.50014	9	29
STRG.824.2	1603	STRG.824	SPAC18G6.15	mal3	Reference	84.4449	0	308
STRG.879.1	2526	STRG.879	-	-	IntronRetention	132.61	23	26
STRG.879.2	1053	STRG.879	SPAC17G8.08c	gdt2	Reference	189.258	0	287
STRG.902.1	744	STRG.902	-	-	IntronRetention	194.792	11	45
STRG.902.2	725	STRG.902	SPAC15F9.03c	nxt2	Reference	70.2988	0	123
STRG.1030.1	632	STRG.1030	SPAC6F6.07c	rps13	Reference	2013.81	0	151
STRG.1030.2	695	STRG.1030	-	-	IntronRetention	1948.32	20	86
STRG.1231.1	1736	STRG.1231	SPAPB1E7.14	iec5	Reference	53.2185	0	144
STRG.1231.2	1781	STRG.1231	-	-	IntronRetention	23.9014	6	22
STRG.1759.2	817	STRG.1759	SPAC11H11.03c	-	Reference	45.3487	0	206
STRG.1759.3	3666	STRG.1759	-	-	IntronRetention	13.2175	18	77
STRG.1860.1	2191	STRG.1860	-	-	IntronRetention	34.4855	58	631
STRG.1860.2	2152	STRG.1860	SPAC22E12.10c	etp1	Reference	7.38574	0	616
STRG.1953.1	915	STRG.1953	SPAC11E3.10	-	Reference	141.845	0	162
STRG.1953.2	1082	STRG.1953	-	-	IntronRetention	16.4867	6	29
STRG.1957.1	550	STRG.1957	SPAC11E3.15	rpl22	Reference	7943.76	0	117
STRG.1957.2	584	STRG.1957	-	-	IntronRetention	3734.7	311	13
STRG.2236.2	1258	STRG.2236	-	-	IntronRetention	1746.4	8	19
STRG.2236.3	651	STRG.2236	SPBC839.05c	rps1701	Reference	97.2607	0	131
STRG.2420.1	855	STRG.2420	-	-	IntronRetention	553.058	5	20
STRG.2420.2	817	STRG.2420	SPBC337.14	rpb4	Reference	2.86061	0	135
STRG.3117.1	897	STRG.3117	SPBC2A9.09	plp2	Reference	245.1	0	233
STRG.3117.2	960	STRG.3117	-	-	IntronRetention	24.3438	7	254
STRG.3442.1	669	STRG.3442	-	-	IntronRetention	487.451	10	11
STRG.3442.2	615	STRG.3442	SPBC31F10.12	tma20	Reference	35.3399	0	181
STRG.3640.1	1251	STRG.3640	SPBC16A3.08c	oga1	Reference	509.263	0	284
STRG.3640.2	1629	STRG.3640	-	-	IntronRetention	66.2384	6	7
STRG.3703.1	1470	STRG.3703	-	-	IntronRetention	79.5783	23	38
STRG.3703.2	1408	STRG.3703	SPBC1289.02c	uap2	Reference	25.5595	0	367
STRG.4373.2	7633	STRG.4373	-	-	IntronRetention	8.21475	5	25
STRG.4373.3	2863	STRG.4373	SPCC18.09c	hnt3	Reference	6.68457	0	232

## Sheet: Novel antisense transcripts
gene_id	strand	RNA_seq_TPM	RNAseq_htseq_hits	coordenates	length
STRG.6.1	-	4.019515	25	chr_II_telomeric_gap:15734-17624	1890
STRG.15.1	-	2.239417	14	I:70373-71767	1394
STRG.28.1	-	24.006549	123	I:107736-108511	775
STRG.28.2	-	3.063748	123	I:107736-108511	775
STRG.28.3	-	1.629174	123	I:107736-108511	775
STRG.72.1	-	1.609800	5	I:240068-240706	638
STRG.88.1	-	2.465532	26	I:303060-304124	1064
STRG.132.1	-	3.797009	26	I:441146-442015	869
STRG.132.2	-	1.734647	26	I:441146-442015	869
STRG.134.1	-	5.248238	13	I:454629-455449	820
STRG.159.1	-	4.839489	12	I:461016-461642	626
STRG.159.2	-	1.540642	12	I:461016-461642	626
STRG.277.1	+	12.532984	8	I:783933-784331	398
STRG.278.1	+	9.095160	6	I:784804-786062	1258
STRG.297.1	-	2.973619	6	I:831664-832633	969
STRG.305.1	+	3.076828	18	I:857254-858132	878
STRG.305.2	+	1.075863	18	I:857254-858132	878
STRG.406.1	-	12.483649	100	I:1120588-1123948	3360
STRG.508.1	+	4.104109	2	I:1411341-1411777	436
STRG.547.1	+	6.108318	9	I:1505984-1506737	753
STRG.552.1	+	0.521710	62	I:1517305-1518873	1568
STRG.570.1	+	7.903220	25	I:1571666-1572960	1294
STRG.636.1	-	2.562283	28	I:1718270-1719806	1536
STRG.677.1	+	0.814147	16	I:1845454-1848666	3212
STRG.688.1	+	6.479383	82	I:1872070-1874013	1943
STRG.695.1	+	5.410401	67	I:1884603-1887375	2772
STRG.703.1	+	33.338049	38	I:2071820-2073556	1736
STRG.728.1	+	1.605809	8	I:1968062-1968787	725
STRG.800.1	+	7.657096	49	I:2171590-2172393	803
STRG.800.2	+	1.172550	49	I:2171689-2172226	537
STRG.876.1	+	3.867975	15	I:2349542-2349816	274
STRG.883.1	+	0.858814	12	I:2360295-2362127	1832
STRG.926.1	+	2.698076	2	I:2557942-2558288	346
STRG.957.1	+	2.292378	67	I:2468555-2472375	3820
STRG.997.1	-	0.385627	10	I:2649359-2650497	1138
STRG.1025.1	-	3.784995	15	I:2727362-2728543	1181
STRG.1031.1	-	9.618246	40	I:2748247-2748879	632
STRG.1114.1	+	3.317942	14	I:2967035-2967862	827
STRG.1115.1	+	4.337425	40	I:2967909-2971001	3092
STRG.1138.1	+	3.868463	7	I:3030753-3031598	845
STRG.1177.1	-	3.426340	15	I:3130010-3134243	4233
STRG.1197.1	-	1.761685	2	I:3252539-3253108	569
STRG.1288.1	-	4.346097	23	I:3560064-3560709	645
STRG.1350.1	-	14.515560	12	I:3676040-3677829	1789
STRG.1370.1	-	6.237784	40	I:3762534-3763924	1390
STRG.1370.2	-	2.338372	40	I:3762534-3763924	1390
STRG.1371.1	-	7.442280	18	I:3787319-3787956	637
STRG.1378.1	-	1.907810	8	I:3751671-3752178	507
STRG.1411.1	+	3.649913	33	I:3826330-3829277	2947
STRG.1418.1	-	15.132997	39	I:3841442-3842670	1228
STRG.1474.1	+	1.493095	5	I:4010251-4010604	353
STRG.1505.1	+	44.761474	14	I:4103745-4106061	2316
STRG.1572.1	+	3.291880	9	I:4309611-4310186	575
STRG.1620.1	-	8.150568	35	I:4526355-4527770	1415
STRG.1677.1	+	1.087248	27	I:4587265-4588196	931
STRG.1687.1	+	1.765573	13	I:4787180-4788923	1743
STRG.1699.1	+	2.410002	9	I:4629917-4630861	944
STRG.1700.1	+	3.614048	13	I:4631362-4632679	1317
STRG.1770.1	-	4.068983	12	I:4843827-4844425	598
STRG.1787.1	-	1.924411	8	I:4881453-4882694	1241
STRG.1788.1	-	4.855772	8	I:4882830-4883435	605
STRG.1802.1	-	2.832161	1	I:4911112-4911511	399
STRG.1822.1	-	6.885933	19	I:4961415-4962876	1461
STRG.1861.1	+	2.903077	22	I:5042141-5044357	2216
STRG.1943.1	+	1.559329	25	I:5277502-5283573	6071
STRG.1956.1	-	13.882369	51	I:5311894-5314579	2685
STRG.1988.1	-	46.735926	138	I:5437922-5439499	1577
STRG.1991.1	-	3.771806	11	I:5442836-5443476	640
STRG.2006.1	-	16.514626	91	I:5445066-5447102	2036
STRG.2009.1	+	13.121165	1	I:5453881-5454247	366
STRG.2021.1	-	8.699793	66	I:5504103-5509227	5124
STRG.2062.1	+	4.856180	12	II:118306-118945	639
STRG.2066.1	-	5.228431	18	II:128655-129908	1253
STRG.2066.2	-	1.715939	18	II:128655-129908	1253
STRG.2094.1	-	6.583922	41	II:212575-215355	2780
STRG.2158.1	-	3.719041	13	II:389435-390346	911
STRG.2159.1	-	4.079771	7	II:390996-391496	500
STRG.2160.1	-	3.684811	32	II:393665-396042	2377
STRG.2212.1	-	2.566439	7	II:574660-575211	551
STRG.2213.1	-	3.359048	34	II:577639-581043	3404
STRG.2218.1	+	6.737429	6	II:591650-592646	996
STRG.2274.1	-	32.064676	43	II:723458-725735	2277
STRG.2300.1	-	2.970084	10	II:792441-793851	1410
STRG.2323.1	+	3.950716	2	II:852787-853451	664
STRG.2354.1	-	10.411260	101	II:948983-950686	1703
STRG.2365.1	+	13.677001	101	II:972790-974888	2098
STRG.2373.1	-	5.104238	60	II:991987-996159	4172
STRG.2399.1	-	10.670338	25	II:1184320-1185189	869
STRG.2401.1	+	8.665101	25	II:1190916-1191234	318
STRG.2447.1	-	27.996429	0	II:1112829-1113245	416
STRG.2521.1	-	0.459328	4	II:1335846-1336893	1047
STRG.2584.1	+	11.821811	19	II:1514692-1516313	1621
STRG.2633.1	+	1.723961	13	II:1678209-1679592	1383
STRG.2634.1	+	3.176265	11	II:1750476-1751472	996
STRG.2685.1	-	4.494189	0	II:1796783-1797279	496
STRG.2704.1	-	2.091196	12	II:1868715-1869738	1023
STRG.2704.2	-	0.750201	45	II:1868715-1869738	1023
STRG.2735.1	+	4.331218	45	II:1962051-1963415	1364
STRG.2757.1	+	3.143505	9	II:2034908-2035648	740
STRG.2828.1	+	2.591681	18	II:2194907-2196365	1458
STRG.2845.1	-	3.315195	3	II:2238258-2238773	515
STRG.2888.1	+	3.371443	1	II:2354681-2355039	358
STRG.2903.1	-	19.590371	48	II:2384737-2386966	2229
STRG.2960.1	-	14.614293	49	II:2531235-2532214	979
STRG.2963.1	-	1.398872	5	II:2536240-2537793	1553
STRG.2999.1	-	43.791031	271	II:2640709-2641706	997
STRG.3019.1	-	5.510727	31	II:2703039-2704547	1508
STRG.3031.1	-	2.657577	11	II:2768585-2769380	795
STRG.3057.1	+	7.572059	21	II:2797743-2798477	734
STRG.3087.1	+	5.566267	24	II:2894549-2895403	854
STRG.3089.1	-	9.376025	88	II:2895683-2896843	1160
STRG.3235.1	-	2.281757	28	II:3202328-3204151	1823
STRG.3275.1	-	3.703450	4	II:3347302-3347829	527
STRG.3286.1	+	11.531808	41	II:3368246-3372271	4025
STRG.3377.1	-	1.158976	31	II:3599808-3604924	5116
STRG.3470.1	+	1.726471	3	II:3855608-3856089	481
STRG.3507.1	+	7.532522	35	II:3953213-3953759	546
STRG.3518.1	+	32.164132	63	II:3974387-3976321	1934
STRG.3518.2	+	2.913795	63	II:3974387-3976321	1934
STRG.3550.1	+	1.882409	7	II:4107992-4108883	891
STRG.3584.1	+	2.032695	9	II:4120121-4120643	522
STRG.3596.1	-	2.969357	9	II:4146867-4147334	467
STRG.3600.1	+	3.549653	14	II:4156972-4157454	482
STRG.3662.1	-	10.408587	37	II:4346386-4350054	3668
STRG.3668.1	-	8.392321	30	II:4414140-4414544	404
STRG.3681.1	-	2.418276	15	II:4457490-4460313	2823
STRG.3720.1	-	2.217149	13	III:54495-56580	2085
STRG.3723.1	-	4.930829	24	III:61273-62811	1538
STRG.3764.1	-	10.954764	25	III:244566-245508	942
STRG.3765.1	-	33.852135	225	III:245530-248076	2546
STRG.3765.2	-	2.746182	225	III:246431-248076	1645
STRG.3847.1	+	0.621833	1	III:389972-390470	498
STRG.3862.1	+	3.861316	18	III:426226-426997	771
STRG.3888.1	+	1.678778	28	III:517635-518602	967
STRG.3910.1	+	7.610523	21	III:601616-602874	1258
STRG.4051.1	-	4.792501	16	III:1064293-1064964	671
STRG.4098.1	-	2.598976	5	III:1196567-1197063	496
STRG.4105.1	-	4.393481	52	III:1213497-1214177	680
STRG.4114.1	-	2.298857	7	III:1244194-1245129	935
STRG.4146.1	-	2.221487	9	III:1342141-1342786	645
STRG.4177.1	+	3.108918	18	III:1425025-1426267	1242
STRG.4191.1	+	4.818518	43	III:1499807-1502365	2558
STRG.4201.1	-	3.930234	20	III:1514346-1516020	1674
STRG.4205.1	+	1.611763	12	III:1534828-1535300	472
STRG.4220.1	+	0.930380	7	III:1580655-1581355	700
STRG.4247.1	+	5.439047	36	III:1683512-1684486	974
STRG.4247.2	+	0.578642	36	III:1683512-1684486	974
STRG.4247.3	+	0.518831	36	III:1683512-1684486	974
STRG.4304.1	+	2.699155	14	III:1807409-1808261	852
STRG.4347.1	-	0.586907	3	III:1903224-1905328	2104
STRG.4351.1	-	1.613631	18	III:1918383-1921409	3026
STRG.4383.1	+	3.571116	18	III:1999501-2000513	1012
STRG.4401.1	-	1.446936	7	III:2068554-2072257	3703
STRG.4402.1	-	3.005356	17	III:2072382-2073629	1247
STRG.4444.1	+	2.164315	6	III:2210039-2210496	457
STRG.4481.1	+	3.412855	28	III:2271463-2274136	2673
STRG.4493.1	+	4.503659	130	III:2298919-2300356	1437
STRG.4509.1	+	1.820185	75	III:2354672-2361476	6804
*RNAseq_htseq_hits are obtained using htseq-count with the 2cleans_MAPQ corrected bam and the antisense new transcripts annotated by stringtie.

## Sheet: Novel intergenic transcripts
gene_id	strand	RNAseq_TPM	RNAseq_htseq_hits	coordenates	length
STRG.2.1	+	1.515409	6	chr_II_telomeric_gap:3682-4685	1003
STRG.10.1	+	1.091813	5	I:48779-50036	1257
STRG.138.1	-	3.557877	26	I:410407-411635	1228
STRG.164.1	+	1.868549	6	I:473137-473374	237
STRG.195.1	-	2.972077	24	I:553675-554942	1267
STRG.255.1	-	1.659147	1	I:718483-718867	384
STRG.339.1	-	2.216532	8	I:902196-902892	696
STRG.393.1	+	2.315071	8	I:1103909-1104577	668
STRG.447.1	+	5.110279	43	I:1253776-1254668	892
STRG.447.2	+	3.692193	43	I:1253776-1254668	892
STRG.699.1	+	4.610831	18	I:2064013-2064512	499
STRG.1039.1	+	2.348936	9	I:2802983-2803438	455
STRG.1062.1	-	4.213045	6	I:2786572-2787015	443
STRG.1192.1	+	7.682077	8	I:3285878-3286366	488
STRG.1291.1	+	2.064027	6	I:3572743-3573227	484
STRG.1313.1	-	7.113539	3	I:3513149-3513673	524
STRG.1345.1	-	2.814250	11	I:3664580-3665661	1081
STRG.1374.1	-	1.562327	6	I:3743615-3744010	395
STRG.1379.1	-	1.533939	6	I:3700930-3701426	496
STRG.1380.1	-	2.157085	7	I:3701814-3702343	529
STRG.1453.1	-	3.820721	16	I:3934217-3934831	614
STRG.1740.1	-	2.781803	11	I:4739538-4739996	458
STRG.1784.1	+	3.088632	4	I:4873282-4873895	613
STRG.2069.1	+	0.911966	4	II:130715-131493	778
STRG.2339.1	+	2.202323	8	II:888795-889174	379
STRG.2442.1	-	2.300760	8	II:1105948-1106295	347
STRG.2494.1	-	2.716472	7	II:1306979-1307304	325
STRG.2560.1	+	28.602202	346	II:1455334-1456737	1403
STRG.2560.2	+	2.118902	346	II:1455334-1456737	1403
STRG.2625.1	-	3.103495	12	II:1660010-1660487	477
STRG.2665.1	-	8.857385	17	II:1727788-1728626	838
STRG.2736.1	-	0.457873	4	II:1962659-1963415	756
STRG.2791.1	-	6.244287	8	II:2098100-2098635	535
STRG.2858.1	+	1.842277	6	II:2294213-2294850	637
STRG.2924.1	+	1.908397	7	II:2443262-2443889	627
STRG.2983.1	-	2.806149	9	II:2593580-2594167	587
STRG.3238.1	+	5.528073	18	II:3237053-3237622	569
STRG.3287.1	-	1.307327	4	II:3372493-3373209	716
STRG.3420.1	-	2.323091	5	II:3721104-3721555	451
STRG.3446.1	+	4.328700	16	II:3784606-3785290	684
STRG.3452.1	+	10.559242	34	II:3801198-3801746	548
STRG.3521.1	-	1.756388	8	II:3982169-3983100	931
STRG.3572.1	+	4.409650	22	II:4091422-4092043	621
STRG.3623.1	-	6.357199	1	II:4230891-4231495	604
STRG.3623.2	-	1.804231	1	II:4230891-4231495	604
STRG.3661.1	+	3.175014	5	II:4345710-4346276	566
STRG.3670.1	+	15.802955	112	II:4419080-4420025	945
STRG.3671.1	-	3.113524	4	II:4439383-4439913	530
STRG.3705.1	+	3.083809	0	II:4387407-4387681	274
STRG.3713.1	-	4.728839	0	II:4403107-4403719	612
STRG.3827.1	-	4.110714	29	III:369622-371050	1428
STRG.3944.1	+	5.188646	11	III:719018-719331	313
STRG.4039.1	+	2.461222	8	III:1069317-1070865	1548
STRG.4041.1	-	1.841299	1	III:1138491-1139177	686
STRG.4139.1	-	1.998039	9	III:1322947-1323517	570
STRG.4449.1	-	5.733531	36	III:2182631-2183462	831
*RNAseq_htseq_hits are obtained using htseq-count with the 2cleans_MAPQ corrected bam and the antisense new transcripts annotated by stringtie.

## Sheet: Novel transcripts translated
Antisense
Gene_id	Chr	Start_codon	Start_pos	Stop_pos	Protein_len(aa)	Transcript_len(nt)	Sequence
STRG.6	chr_II_telomeric_gap	ATG	1052	1193	46	1846	MLPSFFSFFDDGSSSSEDSEELMAMSGNFKDILFILWKSAIKEKRP
STRG.800.2	I	ATG	110	281	56	482	MDLFSQLVRSTFHRNYQPLGGRVTFSFGLIKSNGGPNAPCKIGFWPTLGDLLEFRI
STRG.1411	I	ATG	666	825	52	2948	MLSIVLKNRGSVGDMKETRGITSTLASKMSLFSKDWAKNPFSILYPESIMAS
STRG.1988	I	ATG	48	105	18	1578	MDFITSSTVNIDVLLAKS
STRG.2094	II	ATG	2462	2624	53	2781	MPRLVACFHTTFVWASTPALPSIMATAPSNTATDRSTSKVKSAWPGVSIKLIL
STRG.2401	II	ATG	60	192	43	319	MNWMHFRLSKVDFPLNLEMDNLALYVKNLSCFKKCHFTWAVAL
STRG.2999	II	GTG	252	312	19	998	VITGQTLQQYFCMATTFVF
STRG.4201	III	ATG	12	90	25	1675	MANDCRMSIISKAVVLAKFNAECPL
Intergenic
Gene_id	Peptide_id	Chr	Start_codon	Start_pos	Stop_pos	Protein_len(aa)	Transcript_len(nt)	Sequence
STRG.2		chr_II_telomeric_gap	ATG	23	71	15	1004	MLFDVTEQKCFIGTI
STRG.1453		I	ATG	501	603	33	615	MRSLYCAVSVEMRLREICNMNFLLGRKILSIHV
STRG.2560.1	STRG.2560.1-1	II	ATG	312	390	25	1404	MRLLFCLCSPSHLSFDDVVKKLEKE
STRG.2560.1	STRG.2560.1-2	II	ATG	472	739	88	1404	MVAVINDSWVIPFPTRIELIYRFLRSASNFELKFLVCHIMFVACGRGWVTRENNKAKTQTFVKCGVGRFEAFALSYVMTFSKWIRKWK
STRG.2665		II	TTG	60	93	10	639	LFVTMTVRSS

## Sheet: Missing Pombase 3'UTR
3'UTRs not present in the annotations
ID	length
SPAC750.01	744
SPBC16D10.10	47
SPBC1709.20	86
SPCC1840.13	115
SPMTR.01	100
SPBC32H8.08c	164
SPAC4H3.17	423
SPBC2F12.17	141
SPBC18E5.14c	908
SPAC3A11.06	27
SPAC12B10.11	203
SPAC23C4.04c	25
SPAC1952.04c	132
SPCC18B5.02c	192
SPBP4H10.10	186
SPBC25H2.10c	18
SPBC3D6.16	263
SPBC30D10.21	206
SPCC757.06	551
SPAC30D11.02c	294
SPBPB21E7.08	441
SPBC2G2.10c	110
SPBP4H10.12	256
SPAC227.19c	384
SPCC70.08c	298
SPBC14C8.19	418
SPAC19G12.17	1122
SPAC22F3.15	450
SPAC3C7.02c	429
SPAC18G6.13	73
SPCC285.06c	474
SPCC24B10.12	104
SPCC548.02c	503
SPBC1706.02c	441
SPCC1884.01	531
SPAC2E12.05	532
SPCC830.02	523
SPCC550.01c	67
SPAC8E11.03c	453
SPAC12B10.15c	270
SPBC32H8.06	638
SPAC27E2.12	113
SPCC553.12c	801
SPCC584.12	878
SPCC584.01c	1058
SPCC1450.08c	550
SPBC16E9.17c	91
SPAC2F7.09c	200
SPAC17A5.12	52
SPAC17A5.13	642
SPAC11D3.02c	201
SPBP22H7.09c	194
SPCC16C4.11	264
SPAC7D4.15c	357
SPAC19D5.09c	454
SPAC1F3.09	53
SPCC576.19c	71
SPAC4D7.15	168
SPAC1687.08	171
SPAC14C4.03	228
SPBC3H7.06c	457
SPAPB1A10.16	180
SPAC750.06c	284
SPBC56F2.06	51
SPAC1486.11	85
SPAC17G8.15	46
SPAC57A10.06	79
SPAC186.07c	131
SPAP27G11.11c	666
SPAC2F3.07c	404
SPBC25H2.14	140
SPAC27E2.11c	1519
SPBC23G7.17c	483
SPAC1250.07	160
SPCC306.10	1030
	256	median
	341.373	average

## Sheet: Missing Pombase 5'UTR
5'UTRs not present in the annotations
ID	length
SPAC23D3.14c	23
SPAC9G1.15c	141
SPCC70.09c	57
SPBC530.16	180
SPBC725.12	83
SPAC7D4.15c	33
SPBC8D2.23	116
SPCC622.21	202
SPAC17G8.15	430
SPBC4.01	107
SPBC1718.02	159
SPAC589.11	2
SPAPB1A10.03	194
SPAC4D7.14	171
SPBC32H8.06	188
SPAC22A12.02c	31
SPAC1D4.06c	333
SPBC119.14	64
SPAC22F3.04	285
SPCC576.16c	306
SPBC1711.14	217
SPBC3D6.16	125
SPBC30D10.21	240
SPAC56F8.12	235
SPCC18.19c	278
SPCC18B5.02c	54
SPAC11D3.20	279
SPBC56F2.03	379
SPAC3H5.13	258
SPAC1F7.14c	486
SPAC29B12.12	290
SPCC830.04c	235
SPAC18G6.13	328
SPBC3E7.04c	391
SPCC1393.14	379
SPAC23C11.08	454
SPCC24B10.13	409
SPBC16D10.05	263
SPCC584.12	449
SPAC1A6.10	52
SPBC21C3.20c	263
SPBC460.05	736
SPBC1198.12	640
SPCC584.02	812
SPBC18E5.09c	701
SPAC823.17	332
SPAC24C9.15c	769
SPCC1620.04c	995
SPCC1840.12	1029
SPCC1020.01c	1831
SPCC1840.13	1662
SPBC1773.08c	42
SPCC330.20	78
SPCC285.06c	70
SPBC24C6.13	336
SPCC417.15	92
SPBC337.02c	561
SPAC3G9.16c	485
SPBC1706.02c	348
SPAC6G9.13c	60
SPBP35G2.03c	124
SPAC16A10.08c	177
SPCC1442.11c	46
SPAC23E2.02	320
SPAC27E2.05	848
SPAC29E6.04	95
SPCC645.11c	73
SPAC22F8.03c	28
SPAC343.07	89
SPBC947.03c	128
SPAC8C9.19	72
SPAC6B12.19	192
SPCC4G3.06c	131
SPBC2F12.17	1549
SPAC5H10.01	103
SPAC17A5.04c	269
SPCC830.02	280
SPAC25B8.08	208
SPBC1861.07	87
SPBP4H10.09	258
SPCC1753.03c	468
SPBC8D2.19	196
SPAC4D7.15	91
SPCC1259.14c	248
SPCC663.14c	292
SPBC28E12.02	602
SPBP4H10.12	353
SPBC3H7.06c	151
SPAC750.06c	197
SPBC3B8.10	53
SPAC8E11.08c	96
SPBC15D4.08c	2
SPAC11H11.05c	552
SPBC2G2.10c	161
SPAC27E2.12	321
SPAPB24D3.05c	250
SPBC530.02	87
SPAC186.07c	35
SPBC887.22	20
SPAC926.10	280
SPBC29A3.01	579
SPCC663.06c	47
SPCC306.10	205
	217	median
