# Supplementary material for: Native RNA sequencing in fission yeast reveals frequent alternative splicing isoforms
Source: HighWire-hosted journal article supplement (doi:10.1101/gr.276516.121), 2022-05-26
Supplement: Supplemental_Table_S9.xlsx [file Supplemental_Table_S9.xlsx]

## Sheet: README
Supplemental Table S9 comprises a list of annotated long non-coding RNAs containing ORFs with translation evidence (RibORF score > 0.7).
Gene_id	Gene identifier in the Pombase database.
Start_codon	Sequence of the start codon.
Coordinates	Genomics coordinates of the translated open reading frame (ORF), comprising number of chromosome, start position and end position.
ORF_length	ORF length is given in nucleotides, inlcuding the STOP codon.
read_num	Number of mapped Ribo-Seq reads.
ORF_length (aa)	ORF length is given in amino acids, minimum value is 9.

## Sheet: Supplemental_Table_S9
Gene_id	Start_codon	Coordinates	ORF_length	Transcript_length	read_num	ribORF_score	ORF_length(aa)
SPNCRNA.19.1_3	ATG	I:51207-51309	102	426	11	0.9516	33
SPNCRNA.605.1_4	ATG	I:91077-91194	117	3090	13	1.1693	38
SPNCRNA.619.1_12	ATG	I:190138-190201	63	2025	12	1.1525	20
SPNCRNA.621.1_4	ATG	I:204184-204235	51	726	41	0.9582	16
SPNCRNA.622.1_60	GTG	I:208321-208378	57	2627	47	0.9943	18
SPNCRNA.623.1_17	ATG	I:215419-215530	111	2402	48	1.0584	36
SPNCRNA.628.1_42	ATG	I:240069-240255	186	1620	55	1.0748	61
SPNCRNA.634.1_2	ATG	I:274674-274887	213	2363	15	0.9709	70
SPNCRNA.634.1_8	ACG	I:274471-274699	228	2363	19	0.8224	75
SPNCRNA.659.1_49	ATG	I:527992-528112	120	1901	14	0.9395	39
SPNCRNA.663.1_16	ACG	I:591867-591933	66	1803	25	0.7015	21
SPNCRNA.668.1_1	ATG	I:632603-632762	159	697	39	0.9817	52
SPNCRNA.670.1_3	ATG	I:644566-644605	39	724	22	0.9654	12
SPNCRNA.671.1_25	ATG	I:660835-660889	54	4025	27	0.7172	17
SPNCRNA.671.1_60	ATG	I:661758-661815	57	4025	130	0.976	18
SPNCRNA.671.1_66	ATG	I:661811-661967	156	4025	66	0.979	51
SPNCRNA.675.1_59	ATG	I:678685-678778	93	1910	12	0.7829	30
SPNCRNA.677.1_4	ATG	I:732201-732234	33	2608	42	0.9843	10
SPNCRNA.685.1_15	ATG	I:791186-791258	72	848	16	0.7846	23
SPNCRNA.686.1_57	CTG	I:793476-793509	33	1624	20	0.7667	10
SPNCRNA.696.1_22	ATG	I:920022-920196	174	1055	11	0.7096	57
SPNCRNA.699.1_9	ATG	I:948876-948951	75	651	50	1.0279	24
SPNCRNA.708.1_1	ATG	I:1048823-1048853	30	2076	27	0.9138	9
SPNCRNA.709.1_14	ATG	I:1058030-1058102	72	592	32	0.9607	23
SPNCRNA.711.1_10	ATG	I:1100278-1100413	135	1673	26	0.8449	44
SPNCRNA.713.1_3	ATG	I:1129228-1129312	84	2444	37	0.8557	27
SPNCRNA.716.1_3	ATG	I:1147853-1147943	90	1463	49	1.0653	29
SPNCRNA.716.1_11	TTG	I:1147738-1147831	93	1463	12	1.0492	30
SPNCRNA.722.1_4	ATG	I:1199606-1199675	69	2850	121	0.8412	22
SPNCRNA.724.1_16	ATG	I:1206657-1206729	72	4561	12	0.906	23
SPNCRNA.725.1_2	CTG	I:1220946-1220985	39	4620	16	1.1496	12
SPNCRNA.82.1_3	GTG	I:1234477-1234516	39	399	40	0.9625	12
SPNCRNA.82.1_7	ATG	I:1234559-1234595	36	399	37	1.0401	11
SPNCRNA.728.1_25	ATG	I:1238191-1238227	36	3207	15	1.099	11
SPNCRNA.728.1_75	ATG	I:1237231-1237270	39	3207	14	1.1776	12
SPNCRNA.728.1_94	CTG	I:1236771-1236834	63	3207	11	0.7516	20
SPNCRNA.736.1_16	ATG	I:1358886-1359036	150	2567	15	0.9951	49
SPNCRNA.58.1_7	ATG	I:1393384-1393417	33	447	41	0.8401	10
SPNCRNA.740.1_8	CTG	I:1399196-1399232	36	579	13	0.7466	11
SPNCRNA.751.1_4	ATG	I:1646928-1647021	93	584	20	0.8807	30
SPNCRNA.756.1_14	ACG	I:1712370-1712409	39	540	12	0.8021	12
SPNCRNA.762.1_9	ATG	I:1792679-1792748	69	3185	17	1.0708	22
SPNCRNA.763.1_22	ATG	I:1813957-1814134	177	2482	11	1.0059	58
SPNCRNA.764.1_6	ATG	I:1839999-1840128	129	1469	22	0.8403	42
SPNCRNA.178.1_3	ATG	I:1844161-1844317	156	1210	31	0.8626	51
SPNCRNA.767.1_3	ATG	I:1874876-1874954	78	836	19	0.7362	25
SPNCRNA.771.1_76	CTG	I:1900192-1900252	60	2175	17	0.8794	19
SPNCRNA.783.1_1	ATG	I:1957662-1957845	183	1424	43	0.9294	60
SPNCRNA.785.1_47	ATG	I:2000032-2000086	54	1332	100	0.8596	17
SPNCRNA.792.1_17	ATG	I:2093380-2093518	138	721	72	0.9374	45
SPNCRNA.794.1_23	ATG	I:2095211-2095283	72	867	19	0.7538	23
SPNCRNA.796.1_4	CTG	I:2125604-2125679	75	2538	20	0.7468	24
SPNCRNA.796.1_7	TTG	I:2125442-2125580	138	2538	12	0.8616	45
SPNCRNA.796.1_31	ATG	I:2124876-2125110	234	2538	11	0.8516	77
SPNCRNA.800.1_3	ATG	I:2154291-2154363	72	625	12	1.2623	23
SPNCRNA.800.1_9	ATG	I:2154132-2154219	87	625	118	0.9077	28
SPNCRNA.801.1_124	ATG	I:2179002-2179101	99	2423	11	0.8519	32
SPNCRNA.804.1_3	ATG	I:2199572-2199695	123	644	24	1.2096	40
SPNCRNA.189.1_8	ATG	I:2248690-2248807	117	407	22	1.0587	38
SPNCRNA.808.1_4	ATG	I:2265600-2265750	150	290	49	0.9344	49
SPNCRNA.812.1_24	ATG	I:2323504-2323573	69	2780	12	0.7288	22
SPNCRNA.813.1_40	ATG	I:2326653-2326818	165	1427	15	0.824	54
SPNCRNA.815.1_16	ATG	I:2337784-2337859	75	1847	14	0.8946	24
SPNCRNA.59.1_5	ATG	I:2362562-2362646	84	337	14	1.021	27
SPNCRNA.827.1_22	ATG	I:2443488-2443587	99	1257	12	0.8925	32
SPNCRNA.828.1_49	ATG	I:2451285-2451471	186	1424	20	1.004	61
SPNCRNA.833.1_2	ATG	I:2529796-2529847	51	2159	12	1.0676	16
SPNCRNA.837.1_2	ATG	I:2553991-2554108	117	1899	31	0.8122	38
SPNCRNA.839.1_12	ATG	I:2566347-2566467	120	2240	12	1.048	39
SPNCRNA.839.1_38	GTG	I:2565821-2565872	51	2240	28	1.0941	16
SPNCRNA.841.1_6	ATG	I:2607781-2607904	123	1643	14	0.7383	40
SPNCRNA.849.1_5	ATG	I:2752736-2752865	129	1695	13	0.8407	42
SPNCRNA.857.1_1	ATG	I:2872146-2872224	78	2172	12	1.0549	25
SPNCRNA.857.1_47	TTG	I:2872684-2872777	93	2172	18	0.7143	30
SPNCRNA.862.1_3	TTG	I:2938180-2938219	39	1847	25	0.7389	12
SPNCRNA.862.1_42	ATG	I:2939267-2939375	108	1847	48	0.9504	35
SPNCRNA.863.1_5	ATG	I:2940202-2940694	492	1628	17	1.1697	163
SPNCRNA.863.1_33	ATG	I:2939690-2940035	345	1628	41	0.8614	114
SPNCRNA.873.1_4	ATG	I:3004686-3004827	141	728	42	0.9255	46
SPNCRNA.01.1_5	ATG	I:3003865-3004054	189	1101	11	0.8597	62
SPNCRNA.876.1_40	ATG	I:3031280-3031415	135	2038	29	0.7763	44
SPNCRNA.885.1_12	CTG	I:3093737-3093782	45	1691	11	0.7161	14
SPNCRNA.887.1_29	ATG	I:3117845-3117929	84	2258	13	1.3332	27
SPNCRNA.896.1_2	ATG	I:3228252-3228345	93	1878	14	0.7425	30
SPNCRNA.896.1_20	ATG	I:3227920-3227989	69	1878	15	0.9436	22
SPNCRNA.907.1_2	TTG	I:3405749-3405857	108	392	22	0.7329	35
SPNCRNA.909.1_24	ATG	I:3456302-3456365	63	1729	21	1.1173	20
SPNCRNA.914.1_10	ATG	I:3507460-3507493	33	1117	16	0.8555	10
SPNCRNA.920.1_2	ATG	I:3584997-3585051	54	1255	21	0.9288	17
SPNCRNA.923.1_5	ATG	I:3635733-3635796	63	717	20	1.1604	20
SPNCRNA.934.1_56	ATG	I:3747110-3747182	72	2832	49	1.0729	23
SPNCRNA.952.1_6	ATG	I:3975712-3975784	72	1578	16	1.4019	23
SPNCRNA.953.1_25	TTG	I:3981479-3981578	99	1818	12	0.8023	32
SPNCRNA.953.1_35	ATG	I:3981663-3981810	147	1818	26	1.0256	48
SPNCRNA.954.1_47	CTG	I:3992286-3992559	273	2219	12	0.9084	90
SPNCRNA.954.1_81	ATG	I:3992792-3992972	180	2219	16	1.0921	59
SPNCRNA.954.1_95	ATG	I:3993239-3993281	42	2219	12	0.8691	13
SPNCRNA.959.1_30	ATG	I:4119880-4119931	51	1222	17	0.91	16
SPNCRNA.963.1_13	ATG	I:4140339-4140423	84	965	13	0.7701	27
SPNCRNA.964.1_17	ACG	I:4143470-4143575	105	1614	13	1.2744	34
SPNCRNA.971.1_21	ATG	I:4206303-4206399	96	1188	11	1.2689	31
SPNCRNA.976.1_6	ATG	I:4294367-4294409	42	538	37	0.7776	13
SPNCRNA.979.1_21	ATG	I:4344295-4344367	72	2637	20	0.8375	23
SPNCRNA.981.1_28	ATG	I:4367135-4367225	90	1039	23	1.0387	29
SPNCRNA.989.1_14	ATG	I:4456252-4456492	240	2168	13	0.8132	79
SPNCRNA.990.1_2	ATG	I:4458229-4458259	30	3047	38	1.0452	9
SPNCRNA.990.1_9	ATG	I:4458357-4458468	111	3047	22	0.7763	36
SPNCRNA.130.1_6	ATG	I:4516203-4516359	156	1001	67	0.7264	51
SPNCRNA.1002.1_19	TTG	I:4592965-4593028	63	1730	13	0.8579	20
SPNCRNA.1007.1_15	ATG	I:4637521-4637671	150	1036	81	0.8648	49
SPNCRNA.1014.1_8	ATG	I:4673311-4673386	75	554	20	0.7944	24
SPNCRNA.1016.1_11	ATG	I:4689725-4689782	57	529	20	0.8695	18
SPNCRNA.1021.1_3	ATG	I:4748591-4748825	234	4039	25	1.0374	77
SPNCRNA.1021.1_146	ATG	I:4751788-4751890	102	4039	22	0.8292	33
SPNCRNA.1035.1_3	ATG	I:4911259-4911334	75	355	17	1.049	24
SPNCRNA.1035.1_6	ATG	I:4911303-4911426	123	355	15	1.008	40
SPNCRNA.1044.1_35	ATG	I:5075094-5075277	183	3408	14	0.9858	60
SPNCRNA.1052.1_14	ATG	I:5153366-5153480	114	1509	17	1.2646	37
SPNCRNA.1052.1_29	ATG	I:5153011-5153197	186	1509	21	0.7123	61
SPNCRNA.1053.1_33	ATG	I:5153247-5153343	96	1298	13	0.9422	31
SPNCRNA.1067.1_5	ATG	I:5293018-5293168	150	785	24	0.9724	49
SPNCRNA.1069.1_5	ATG	I:5309367-5309433	66	2169	34	1.0452	21
SPNCRNA.1073.1_4	ATG	I:5328941-5328983	42	499	31	0.8384	13
SPNCRNA.1077.1_7	ATG	I:5360740-5360995	255	1276	13	0.8327	84
SPNCRNA.1081.1_22	ATG	I:5416752-5416869	117	1062	16	0.8827	38
SPNCRNA.1081.1_27	ACG	I:5416840-5417020	180	1062	15	0.8959	59
SPNCRNA.1083.1_1	ATG	I:5428041-5428146	105	1298	21	0.9072	34
SPNCRNA.1083.1_15	ATG	I:5427774-5427894	120	1298	13	0.7172	39
SPNCRNA.1083.1_23	CTG	I:5427566-5427710	144	1298	47	0.7186	47
SPNCRNA.1087.1_15	ATG	I:5472947-5472986	39	3119	20	0.8833	12
SPNCRNA.1093.1_17	ATG	I:5497286-5497397	111	896	12	1.0756	36
SPNCRNA.1096.1_3	ATG	III:39239-39275	36	1662	21	1.3027	11
SPNCRNA.1097.1_1	ATG	III:41323-41374	51	1798	12	0.9976	16
SPNCRNA.1097.1_4	ATG	III:41200-41284	84	1798	21	1.1784	27
SPNCRNA.1100.1_49	ATG	III:48423-48495	72	1370	11	1.4798	23
SPNCRNA.1101.1_51	ATG	III:77395-77470	75	2268	21	0.8468	24
SPNCRNA.1103.1_7	ATG	III:91132-91198	66	1845	11	0.8906	21
SPNCRNA.1111.1_4	ATG	III:119300-119372	72	934	12	0.8352	23
SPNCRNA.1116.1_13	ATG	III:173267-173405	138	2697	26	0.8485	45
SPNCRNA.1119.1_10	ATG	III:218041-218158	117	891	21	0.8888	38
SPNCRNA.1119.1_16	ATG	III:217885-218020	135	891	15	0.9906	44
SPNCRNA.1125.1_2	TTG	III:285680-285740	60	675	13	0.7383	19
SPNCRNA.1125.1_3	ATG	III:285732-285777	45	675	15	0.7062	14
SPNCRNA.1129.1_17	ATG	III:309550-309619	69	1149	19	1.0777	22
SPNCRNA.462.1_4	ATG	III:322497-322527	30	282	14	1.0012	9
SPNCRNA.1138.1_60	ATG	III:435288-435531	243	3429	21	1.0377	80
SPNCRNA.1140.1_24	ATG	III:469154-469262	108	1913	11	0.8179	35
SPNCRNA.1142.1_23	CTG	III:514761-514812	51	795	11	0.7422	16
SPNCRNA.1145.1_12	ATG	III:595013-595061	48	885	12	1.1176	15
SPNCRNA.1153.1_9	ATG	III:717968-718034	66	1265	26	0.7929	21
SPNCRNA.1157.1_27	ATG	III:764309-764393	84	1956	19	0.7897	27
SPNCRNA.1157.1_43	ATG	III:764671-764911	240	1956	33	0.9889	79
SPNCRNA.1158.1_23	ATG	III:766358-766565	207	1926	15	0.7197	68
SPNCRNA.1161.1_6	CTG	III:916968-917088	120	535	14	0.7094	39
SPNCRNA.128.1_34	ACG	III:990284-990347	63	893	94	0.8394	20
SPNCRNA.1167.1_12	ATG	III:1021260-1021356	96	1253	20	0.9237	31
SPNCRNA.1167.1_27	ATG	III:1021695-1021815	120	1253	12	0.7251	39
SPNCRNA.1175.1_27	ATG	III:1157004-1157088	84	1015	32	0.9971	27
SPNCRNA.1177.1_2	ATG	III:1173165-1173237	72	4349	33	0.8838	23
SPNCRNA.1177.1_21	ATG	III:1172604-1172805	201	4349	11	0.7561	66
SPNCRNA.1183.1_12	ATG	III:1268391-1268511	120	582	38	0.8521	39
SPNCRNA.1191.1_63	ATG	III:1386345-1386450	105	3091	70	0.9478	34
SPNCRNA.1192.1_1	ATG	III:1400743-1400791	48	793	11	0.9033	15
SPNCRNA.1194.1_2	ATG	III:1410860-1411034	174	1620	59	1.0358	57
SPNCRNA.1195.1_9	ACG	III:1421923-1421956	33	3364	17	1.4691	10
SPNCRNA.1198.1_10	ATG	III:1457409-1457520	111	1593	11	1.0418	36
SPNCRNA.1204.1_36	ATG	III:1551622-1551700	78	1258	26	1.0523	25
SPNCRNA.1208.1_50	CTG	III:1588100-1588451	351	1942	11	1.1343	116
SPNCRNA.1214.1_2	ATG	III:1652720-1652822	102	1890	35	0.9892	33
SPNCRNA.1215.1_10	ATG	III:1673956-1674007	51	2356	18	0.7641	16
SPNCRNA.1216.1_6	ATG	III:1674760-1674814	54	618	15	0.9746	17
SPNCRNA.1222.1_13	ATG	III:1720012-1720072	60	1124	15	1.1185	19
SPNCRNA.1230.1_22	ATG	III:1796188-1796374	186	1154	76	0.8828	61
SPNCRNA.1231.1_38	ATG	III:1800334-1800427	93	1219	14	1.0556	30
SPNCRNA.1232.1_5	ATG	III:1804389-1804482	93	971	17	1.0308	30
SPNCRNA.1234.1_100	ATG	III:1837980-1838055	75	2594	21	0.8634	24
SPNCRNA.1236.1_12	ATG	III:1860248-1860341	93	615	161	1.0059	30
SPNCRNA.1241.1_10	ATG	III:1894147-1894216	69	745	12	1.3689	22
SPNCRNA.1253.1_4	ATG	III:2008148-2008193	45	1781	35	0.9571	14
SPNCRNA.1253.1_7	ACG	III:2008200-2008359	159	1781	13	0.9592	52
SPNCRNA.1261.1_50	ATG	III:2096054-2096093	39	992	17	0.9142	12
SPNCRNA.1263.1_2	TTG	III:2111298-2111355	57	5317	66	0.709	18
SPNCRNA.1264.1_15	ATG	III:2117437-2117518	81	1747	12	1.0311	26
SPNCRNA.1275.1_30	ATG	III:2236963-2237062	99	1294	11	0.8216	32
SPNCRNA.1276.1_21	ATG	III:2241666-2241786	120	2275	22	0.7376	39
SPNCRNA.1278.1_22	ATG	III:2258131-2258269	138	2176	12	0.7209	45
SPNCRNA.1281.1_10	ATG	III:2290132-2290207	75	1257	16	0.9196	24
SPNCRNA.1281.1_17	ATG	III:2290009-2290111	102	1257	17	1.0922	33
SPNCRNA.1292.1_13	ATG	III:2367906-2367936	30	1252	13	1.1787	9
SPNCRNA.1292.1_28	ATG	III:2368137-2368554	417	1252	18	0.9806	138
SPNCRNA.29.1_2	ATG	III:2419073-2419103	30	749	11	1.1343	9
SPNCRNA.1296.1_2	ATG	III:2423093-2423168	75	850	20	1.2777	24
SPNCRNA.1298.1_4	ATG	III:2433271-2433397	126	751	12	0.8931	41
SPNCRNA.1299.1_11	TTG	III:2448920-2449076	156	743	12	0.8809	51
SPNCRNA.1305.1_42	ATG	II:72255-72369	114	1844	52	0.9996	37
SPNCRNA.1306.1_2	TTG	II:80067-80184	117	1244	69	0.7014	38
SPNCRNA.291.1_5	ACG	II:104321-104408	87	1364	11	1.0969	28
SPNCRNA.1316.1_60	ACG	II:147320-147350	30	3107	13	1.0505	9
SPNCRNA.1334.1_3	GTG	II:275709-275742	33	749	18	0.8903	10
SPNCRNA.1343.1_18	ATG	II:354346-354391	45	1543	37	1.0771	14
SPNCRNA.1344.1_15	ATG	II:356701-356776	75	1269	22	1.046	24
SPNCRNA.304.1_92	ATG	II:361011-361071	60	2585	40	0.9985	19
SPNCRNA.1351.1_3	TTG	II:387818-387848	30	1186	39	0.9956	9
SPNCRNA.1352.1_7	ATG	II:389224-389377	153	1343	19	0.9533	50
SPNCRNA.1355.1_4	ATG	II:413201-413330	129	675	12	1.0638	42
SPNCRNA.1355.1_12	ATG	II:413160-413205	45	675	15	0.8887	14
SPNCRNA.1357.1_29	TTG	II:438624-438669	45	2153	12	0.8034	14
SPNCRNA.1358.1_54	ATG	II:444943-445036	93	1681	17	0.9297	30
SPNCRNA.1360.1_4	ATG	II:450905-450971	66	811	12	1.2585	21
SPNCRNA.1366.1_32	ATG	II:521450-521690	240	2320	14	0.8214	79
SPNCRNA.1368.1_14	ATG	II:538837-538921	84	2416	77	0.8151	27
SPNCRNA.1368.1_31	ATG	II:538372-538438	66	2416	22	1.3035	21
SPNCRNA.316.1_9	ATG	II:592213-592348	135	815	26	1.126	44
SPNCRNA.1381.1_7	ATG	II:701636-701678	42	1781	28	1.1645	13
SPNCRNA.1381.1_11	ATG	II:701501-701621	120	1781	12	1.185	39
SPNCRNA.1382.1_28	ATG	II:714791-714959	168	1245	63	0.9032	55
SPNCRNA.1399.1_2	ATG	II:948971-949046	75	1158	26	0.7398	24
SPNCRNA.1400.1_24	ATG	II:963510-963621	111	699	25	1.0294	36
SPNCRNA.1403.1_22	ATG	II:1001173-1001413	240	1028	50	0.8558	79
SPNCRNA.1417.1_20	ATG	II:1160482-1160527	45	2191	16	1.0521	14
SPNCRNA.1422.1_15	ATG	II:1240727-1240856	129	1102	11	0.9416	42
SPNCRNA.1423.1_14	ATG	II:1264117-1264201	84	760	23	0.9459	27
SPNCRNA.1426.1_20	ATG	II:1281769-1281829	60	854	15	0.9798	19
SPNCRNA.1426.1_31	ATG	II:1281522-1281633	111	854	11	0.9859	36
SPNCRNA.1431.1_7	ATG	II:1354467-1354542	75	1648	21	0.7738	24
SPNCRNA.1439.1_34	ATG	II:1526812-1526983	171	1131	13	1.0663	56
SPNCRNA.1440.1_17	ATG	II:1532570-1532615	45	1016	20	1.2409	14
SPNCRNA.1443.1_62	ATG	II:1556242-1556404	162	2796	21	1.2	53
SPNCRNA.1447.1_165	ATG	II:1565990-1566116	126	3570	28	1.0699	41
SPNCRNA.1456.1_51	ATG	II:1713130-1713187	57	1576	32	1.1965	18
SPNCRNA.1458.1_28	ATG	II:1738349-1738445	96	1189	17	0.7747	31
SPNCRNA.1458.1_34	ATG	II:1738071-1738353	282	1189	22	1.0319	93
SPNCRNA.1466.1_1	ATG	II:1812083-1812272	189	1622	30	0.8219	62
SPNCRNA.1476.1_41	ATG	II:1929463-1929535	72	1850	11	0.986	23
SPNCRNA.388.1_2	ATG	II:2115740-2115812	72	1576	31	0.9957	23
SPNCRNA.1489.1_46	ATG	II:2138140-2138200	60	2012	19	0.7498	19
SPNCRNA.1494.1_4	ATG	II:2212069-2212213	144	1827	62	0.9481	47
SPNCRNA.1498.1_47	ATG	II:2244963-2245104	141	1784	11	1.1394	46
SPNCRNA.1503.1_78	ATG	II:2328693-2328756	63	3270	15	1.0971	20
SPNCRNA.1504.1_14	ATG	II:2328987-2329053	66	1010	27	0.9969	21
SPNCRNA.1504.1_29	ATG	II:2329306-2329459	153	1010	33	0.8808	50
SPNCRNA.1504.1_35	ATG	II:2329403-2329580	177	1010	26	0.8042	58
SPNCRNA.1515.1_19	ATG	II:2450239-2450398	159	874	30	0.8872	52
SPNCRNA.1516.1_28	ATG	II:2462577-2462715	138	1211	19	1.0774	45
SPNCRNA.1517.1_40	ATG	II:2463319-2463439	120	1554	13	1.1959	39
SPNCRNA.1518.1_38	ATG	II:2467239-2467296	57	2019	14	0.9165	18
SPNCRNA.1532.1_8	ATG	II:2586111-2586186	75	1542	22	1.1021	24
SPNCRNA.1537.1_1	ATG	II:2631054-2631090	36	1278	32	0.7763	11
SPNCRNA.1537.1_17	ATG	II:2631280-2631334	54	1278	12	0.8696	17
SPNCRNA.1538.1_5	ATG	II:2637273-2637399	126	2997	106	0.8642	41
SPNCRNA.1543.1_3	ATG	II:2678494-2678584	90	1547	18	0.9122	29
SPNCRNA.1544.1_8	ATG	II:2684122-2684164	42	1669	29	1.1361	13
SPNCRNA.1544.1_20	ATG	II:2684388-2684517	129	1669	32	1.042	42
SPNCRNA.1544.1_37	ATG	II:2684864-2685020	156	1669	16	0.8858	51
SPNCRNA.1545.1_23	ATG	II:2720188-2720236	48	907	49	0.7038	15
SPNCRNA.1547.1_5	ATG	II:2764271-2764322	51	222	12	1.0121	16
SPNCRNA.1548.1_3	ATG	II:2764368-2764476	108	1018	50	0.7164	35
SPNCRNA.1550.1_6	ATG	II:2806097-2806208	111	1610	15	0.9031	36
SPNCRNA.1563.1_9	ATG	II:2927460-2927544	84	2522	19	0.7766	27
SPNCRNA.1564.1_13	ATG	II:2935663-2935789	126	1253	29	0.932	41
SPNCRNA.1567.1_11	ATG	II:2959277-2959394	117	2078	11	1.0072	38
SPNCRNA.1567.1_31	ATG	II:2959742-2959784	42	2078	17	0.9026	13
SPNCRNA.1567.1_33	ATG	II:2959797-2959854	57	2078	16	0.8571	18
SPNCRNA.1567.1_57	ATG	II:2960425-2960482	57	2078	20	0.9477	18
SPNCRNA.1568.1_6	ATG	II:2980042-2980117	75	668	28	1.1911	24
SPNCRNA.1576.1_2	CTG	II:3031607-3031667	60	1229	20	1.0333	19
SPNCRNA.1581.1_3	ATG	II:3127477-3127573	96	743	69	0.9186	31
SPNCRNA.1584.1_15	ATG	II:3162605-3162692	87	1333	47	0.8676	28
SPNCRNA.1585.1_19	TTG	II:3166834-3166885	51	977	11	0.8928	16
SPNCRNA.1588.1_2	TTG	II:3228950-3228989	39	1748	20	0.9269	12
SPNCRNA.1597.1_2	ATG	II:3390967-3391117	150	2977	111	1.075	49
SPNCRNA.1597.1_9	ATG	II:3391180-3391414	234	2977	381	0.7206	77
SPNCRNA.1600.1_4	ATG	II:3460970-3461015	45	809	96	0.9724	14
SPNCRNA.1600.1_8	ATG	II:3460885-3460951	66	809	33	0.9037	21
SPNCRNA.1602.1_43	CTG	II:3473217-3473268	51	1819	19	1.0659	16
SPNCRNA.1602.1_45	ATG	II:3473162-3473198	36	1819	23	0.8465	11
SPNCRNA.1615.1_2	ATG	II:3560726-3560846	120	1730	68	0.9736	39
SPNCRNA.1616.1_30	ATG	II:3573315-3573408	93	1580	13	1.0773	30
SPNCRNA.1621.1_4	ATG	II:3597685-3597763	78	660	79	1.0676	25
SPNCRNA.1625.1_8	ATG	II:3625518-3625662	144	3404	16	1.0609	47
SPNCRNA.1625.1_116	ATG	II:3623334-3623373	39	3404	13	1.378	12
SPNCRNA.1626.1_7	ATG	II:3630916-3630949	33	5113	67	1.1576	10
SPNCRNA.1626.1_13	ATG	II:3630713-3630791	78	5113	284	0.9789	25
SPNCRNA.1626.1_185	ATG	II:3627091-3627394	303	5113	12	1.1791	100
SPNCRNA.427.1_3	GTG	II:3670346-3670409	63	536	24	0.8724	20
SPNCRNA.1630.1_59	ATG	II:3688676-3688730	54	2137	53	1.1579	17
SPNCRNA.1630.1_67	ATG	II:3688475-3688604	129	2137	37	1.1166	42
SPNCRNA.1635.1_18	ATG	II:3752930-3753083	153	1238	19	0.9022	50
SPNCRNA.1643.1_64	ATG	II:3812657-3812756	99	2361	20	0.858	32
SPNCRNA.1643.1_69	CTG	II:3812765-3812816	51	2361	12	0.7682	16
SPNCRNA.1644.1_7	ATG	II:3829252-3829297	45	2675	19	0.7012	14
SPNCRNA.1644.1_13	ACG	II:3829154-3829196	42	2675	20	0.718	13
SPNCRNA.1644.1_22	TTG	II:3828936-3829005	69	2675	11	1.0179	22
SPNCRNA.1644.1_30	ATG	II:3828831-3828897	66	2675	13	0.9947	21
SPNCRNA.1645.1_17	ATG	II:3858336-3858465	129	2870	21	0.9216	42
SPNCRNA.111.1_71	ATG	II:3980606-3980654	48	3776	528	0.8379	15
SPNCRNA.1658.1_28	ATG	II:4039566-4039662	96	4284	39	0.7519	31
SPNCRNA.1666.1_6	ATG	II:4088312-4088378	66	502	12	1.0149	21
SPNCRNA.1671.1_4	ATG	II:4120961-4121060	99	2113	92	0.9546	32
SPNCRNA.1678.1_44	ATG	II:4189390-4189648	258	2007	18	1.0706	85
SPNCRNA.438.1_4	ATG	II:4195959-4196001	42	1198	28	1.2941	13
SPNCRNA.438.1_5	ATG	II:4195822-4195921	99	1198	15	1.1298	32
SPNCRNA.438.1_16	ATG	II:4195446-4195647	201	1198	18	0.7474	66
SPNCRNA.1690.1_17	ATG	II:4426549-4426753	204	2467	13	0.9127	67
SPNCRNA.1691.1_32	ATG	II:4429763-4429868	105	1503	52	0.8084	34
SPNCRNA.1693.1_27	ATG	II:4435927-4435960	33	1182	43	1.2836	10
SPNCRNA.532.1_2	ATG	II:4466233-4466302	69	878	13	0.7366	22
